# Supplementary material for: A reliable analytical procedure to determine the carbon isotopic signature of CO2-bearing COH fluids generated in petrological experiments
Source: Copernicus journal article supplement (doi:10.5194/ejm-37-25-2025), 2025-01-17
Supplement: Supplementary file 1 [file ejm-37-25-2025-supplement.zip]

## Sheet: Table S1
Table S1. IRMS δ13C determination of QMS CO2 calibration mixture at room temperature (28 °C) and at QMS operative temperature (105 °)
QMS line T: 28 °C (room T)
Sample	δ13C
QMS_CO2_calib_4_1	-42.385
QMS_CO2_calib_4_2	-42.364
QMS_CO2_calib_4_3	-42.418
QMS_CO2_calib_4_4	-42.394
QMS_CO2_calib_4_5	-42.286
QMS_CO2_calib_4_6	-42.336
QMS_CO2_calib_4_7	-42.229
QMS_CO2_calib_4_8	-42.234
Average (1σ)	-42.33(7)
QMS line T: 105 °C
Sample	δ13C
QMS_CO2_calib_1_1	-42.677
QMS_CO2_calib_1_2	-42.711
QMS_CO2_calib_1_3	-42.705
QMS_CO2_calib_1_4	-42.64
QMS_CO2_calib_1_5	-42.662
QMS_CO2_calib_1_6	-42.646
QMS_CO2_calib_1_7	-42.679
QMS_CO2_calib_1_8	-42.547
Average (1σ)	-42.66(5)
Sample	δ13C
QMS_CO2_calib_2_1	-42.536
QMS_CO2_calib_2_2	-42.502
QMS_CO2_calib_2_3	-42.405
QMS_CO2_calib_2_4	-42.46
QMS_CO2_calib_2_5	-42.521
QMS_CO2_calib_2_6	-42.411
QMS_CO2_calib_2_7	-42.393
QMS_CO2_calib_2_8	-42.415
Average (1σ)	-42.46(6)
Sample	δ13C
QMS_CO2_calib_3_1	-42.666
QMS_CO2_calib_3_2	-42.615
QMS_CO2_calib_3_3	-42.613
QMS_CO2_calib_3_4	-42.604
QMS_CO2_calib_3_5	-42.582
QMS_CO2_calib_3_6	-42.585
QMS_CO2_calib_3_7	-42.529
QMS_CO2_calib_3_8	-42.46
Average(1σ)	-42.58(6)

## Sheet: Table S2
Table S2. Raw data from QMS for the OAA decomposition experiments. Signal intensities are expressed in arbitrary units.
OAA_1 (total pressure = 0.026 bar, furnace T = 87.5 °C, initial reactor position = 6 mm)
Time (s)	Total signal intesity	m/z 2	m/z 12	m/z 14	m/z 15	m/z 18	m/z 40	m/z 28	m/z 32	m/z 44	m/z 33	m/z 34	m/z 48	m/z 64
0	1.58875e-07	1.6731e-09	-2.15779e-10	-1.72661e-10	-2.44168e-10	3.04003e-10	3.24304e-07	9.54871e-10	-1.08125e-11	-1.67127e-10	-2.28904e-10	-2.27614e-10	-2.28827e-10	-2.35636e-10
7	1.58319e-07	1.66862e-09	-2.32295e-10	-1.74894e-10	-2.39742e-10	2.78064e-10	3.24485e-07	9.7078e-10	1.69817e-11	-1.82443e-10	-2.31359e-10	-2.40408e-10	-2.30562e-10	-2.21153e-10
14	1.58359e-07	1.65938e-09	-2.28035e-10	-1.68379e-10	-2.30557e-10	2.92337e-10	3.24312e-07	9.84328e-10	-1.11249e-11	-1.48448e-10	-2.36781e-10	-2.22702e-10	-2.33461e-10	-2.41045e-10
21	1.58317e-07	1.67019e-09	-2.40015e-10	-1.70591e-10	-2.32749e-10	2.86731e-10	3.24717e-07	9.62712e-10	5.17809e-12	-1.90245e-10	-2.34925e-10	-2.516e-10	-2.29796e-10	-2.40375e-10
28	1.58339e-07	1.67304e-09	-2.47566e-10	-1.81109e-10	-2.24868e-10	2.88838e-10	3.24566e-07	9.73165e-10	-3.82807e-12	-1.70325e-10	-2.34272e-10	-2.25451e-10	-2.25083e-10	-2.28827e-10
35	1.58389e-07	1.64629e-09	-2.44775e-10	-1.84475e-10	-2.27171e-10	3.05913e-10	3.24377e-07	9.40909e-10	-8.91718e-12	-1.72331e-10	-2.39078e-10	-2.40294e-10	-2.45096e-10	-2.19596e-10
42	1.58323e-07	1.66949e-09	-2.21963e-10	-1.75193e-10	-2.27546e-10	2.66942e-10	3.25015e-07	9.71136e-10	1.42247e-11	-1.64069e-10	-2.42275e-10	-2.38697e-10	-2.36922e-10	-2.55392e-10
49	1.58674e-07	1.64907e-09	-2.21721e-10	-1.62788e-10	-2.33705e-10	2.93593e-10	3.2519e-07	1.37722e-09	6.91122e-11	-7.64454e-11	-2.27533e-10	-2.37703e-10	-2.33391e-10	-2.41038e-10
56	1.58512e-07	1.65928e-09	-1.99445e-10	-1.14323e-10	-2.34734e-10	3.69347e-10	3.22593e-07	3.27932e-09	2.58726e-10	6.86701e-10	-2.24744e-10	-2.50955e-10	-2.26492e-10	-2.36068e-10
63	1.57824e-07	1.65719e-09	-1.36905e-10	-3.43984e-11	-2.20391e-10	5.24121e-10	3.18978e-07	5.10857e-09	4.06861e-10	1.83987e-09	-2.17055e-10	-2.26076e-10	-2.47641e-10	-2.23507e-10
70	1.57008e-07	1.7246e-09	-8.73849e-11	-7.45115e-12	-2.31116e-10	6.8684e-10	3.16773e-07	6.1411e-09	4.93869e-10	2.8717e-09	-2.27587e-10	-2.32672e-10	-2.31019e-10	-2.32945e-10
77	1.56476e-07	1.75045e-09	-4.55385e-11	1.68006e-11	-2.26368e-10	8.59962e-10	3.1468e-07	6.77056e-09	5.16466e-10	3.36124e-09	-2.27983e-10	-2.36375e-10	-2.34378e-10	-2.27711e-10
84	1.563e-07	1.79374e-09	6.1257e-13	4.0918e-11	-2.34715e-10	9.66423e-10	3.1423e-07	6.90871e-09	4.83228e-10	3.5838e-09	-2.37491e-10	-2.22808e-10	-2.42696e-10	-2.38508e-10
91	1.56209e-07	1.86675e-09	3.10631e-12	1.09961e-11	-2.15124e-10	1.08425e-09	3.14593e-07	6.89834e-09	4.58715e-10	3.49215e-09	-2.36192e-10	-2.40402e-10	-2.33685e-10	-2.40485e-10
98	1.56302e-07	1.86923e-09	2.06552e-11	1.29596e-13	-2.31022e-10	1.06295e-09	3.15013e-07	6.71664e-09	4.52247e-10	3.34261e-09	-2.31195e-10	-2.28585e-10	-2.41052e-10	-2.55853e-10
105	1.56435e-07	1.88896e-09	-1.30204e-11	-4.76933e-12	-2.20578e-10	1.12358e-09	3.14821e-07	6.40996e-09	4.13988e-10	3.15783e-09	-2.44971e-10	-2.36265e-10	-2.39937e-10	-2.36179e-10
112	1.5658e-07	1.93685e-09	-4.84972e-11	-2.2831e-11	-2.26333e-10	1.14241e-09	3.16334e-07	6.1131e-09	4.38472e-10	2.98799e-09	-2.27047e-10	-2.46009e-10	-2.38639e-10	-2.34422e-10
119	1.56739e-07	1.90499e-09	-4.75045e-11	-4.02028e-11	-2.31267e-10	1.1463e-09	3.17025e-07	5.76795e-09	3.91704e-10	2.74589e-09	-2.33056e-10	-2.223e-10	-2.43233e-10	-2.39999e-10
126	1.56843e-07	1.92687e-09	-5.8051e-11	-4.69044e-11	-2.17862e-10	1.14562e-09	3.17595e-07	5.4828e-09	3.60593e-10	2.54817e-09	-2.24785e-10	-2.25447e-10	-2.43698e-10	-2.19696e-10
133	1.57855e-07	1.91717e-09	-9.29798e-11	-5.9218e-11	-2.19463e-10	1.14586e-09	3.20543e-07	5.22363e-09	3.67898e-10	2.34017e-09	-2.32375e-10	-2.3662e-10	-2.37599e-10	-2.26571e-10
140	1.58522e-07	1.95331e-09	-8.22725e-11	-3.90147e-11	-2.40907e-10	1.15861e-09	3.22001e-07	4.94496e-09	3.33797e-10	2.13044e-09	-2.37404e-10	-2.54904e-10	-2.35393e-10	-2.28366e-10
147	1.589e-07	1.93353e-09	-7.4312e-11	-6.95927e-11	-2.3549e-10	1.08363e-09	3.22269e-07	4.7133e-09	3.0794e-10	2.03231e-09	-2.35029e-10	-2.4434e-10	-2.3201e-10	-2.4691e-10
154	1.59103e-07	1.95712e-09	-1.1593e-10	-7.7071e-11	-2.32461e-10	1.08576e-09	3.23028e-07	4.49656e-09	2.841e-10	1.84851e-09	-2.47919e-10	-2.38025e-10	-2.50769e-10	-2.31791e-10
161	1.59265e-07	1.93026e-09	-9.69013e-11	-6.41257e-11	-2.28354e-10	1.07289e-09	3.23976e-07	4.26976e-09	2.50327e-10	1.68177e-09	-2.36479e-10	-2.2818e-10	-2.32977e-10	-2.43265e-10
168	1.59507e-07	1.92515e-09	-1.12463e-10	-5.97829e-11	-2.26467e-10	1.02813e-09	3.24367e-07	4.04313e-09	2.57793e-10	1.57115e-09	-2.52636e-10	-2.34912e-10	-2.36832e-10	-2.51554e-10
175	1.59438e-07	1.91168e-09	-1.44009e-10	-1.12467e-10	-2.25589e-10	1.05526e-09	3.24155e-07	3.82292e-09	2.51975e-10	1.44239e-09	-2.32783e-10	-2.34215e-10	-2.4525e-10	-2.31351e-10
182	1.59475e-07	1.91186e-09	-1.47983e-10	-9.3308e-11	-2.23788e-10	1.03462e-09	3.24793e-07	3.6834e-09	2.38211e-10	1.33023e-09	-2.44488e-10	-2.3519e-10	-2.41517e-10	-2.43675e-10
189	1.59485e-07	1.91795e-09	-1.57554e-10	-1.12675e-10	-2.3454e-10	9.37128e-10	3.25264e-07	3.46216e-09	1.91569e-10	1.22158e-09	-2.27812e-10	-2.4891e-10	-2.46758e-10	-2.44222e-10
196	1.59492e-07	1.90616e-09	-1.30548e-10	-8.72861e-11	-2.26767e-10	9.6076e-10	3.24937e-07	3.31179e-09	1.67154e-10	1.12954e-09	-2.49405e-10	-2.56046e-10	-2.45041e-10	-2.35646e-10
203	1.59221e-07	1.896e-09	-1.54664e-10	-1.05233e-10	-2.44141e-10	9.52583e-10	3.23577e-07	3.1168e-09	1.85106e-10	1.0197e-09	-2.28837e-10	-2.24118e-10	-2.38471e-10	-2.4356e-10
210	1.5819e-07	1.91634e-09	-1.71873e-10	-9.42928e-11	-2.34529e-10	9.0501e-10	3.23178e-07	2.98106e-09	1.60214e-10	9.39773e-10	-2.43438e-10	-2.4553e-10	-2.33311e-10	-2.49649e-10
217	1.57849e-07	1.88089e-09	-1.6401e-10	-1.21107e-10	-2.35284e-10	8.97174e-10	3.22613e-07	2.85993e-09	1.74927e-10	8.64086e-10	-2.39661e-10	-2.33384e-10	-2.48025e-10	-2.34832e-10
224	1.57812e-07	1.90964e-09	-1.66149e-10	-1.19637e-10	-2.23982e-10	8.52499e-10	3.22585e-07	2.75332e-09	1.44739e-10	7.86702e-10	-2.47017e-10	-2.4588e-10	-2.48447e-10	-2.248e-10
231	1.57881e-07	1.86221e-09	-1.89866e-10	-1.34262e-10	-2.25194e-10	8.68841e-10	3.2314e-07	2.61887e-09	1.3638e-10	7.36097e-10	-2.47948e-10	-2.40663e-10	-2.49542e-10	-2.33409e-10
238	1.57832e-07	1.89862e-09	-1.82966e-10	-1.19079e-10	-2.40576e-10	8.32545e-10	3.23151e-07	2.50484e-09	1.42868e-10	6.5054e-10	-2.30692e-10	-2.33171e-10	-2.44528e-10	-2.37971e-10
245	1.57997e-07	1.86896e-09	-1.79484e-10	-1.26631e-10	-2.29174e-10	8.55292e-10	3.23307e-07	2.41444e-09	1.11062e-10	5.87688e-10	-2.35422e-10	-2.25678e-10	-2.42633e-10	-2.33483e-10
252	1.58052e-07	1.87556e-09	-1.93857e-10	-1.48351e-10	-2.33241e-10	8.14867e-10	3.23686e-07	2.32839e-09	1.20173e-10	5.40194e-10	-2.53389e-10	-2.34661e-10	-2.30004e-10	-2.46013e-10
259	1.57993e-07	1.88512e-09	-1.99471e-10	-1.53906e-10	-2.33528e-10	7.58332e-10	3.23977e-07	2.29322e-09	1.2021e-10	4.93084e-10	-2.35088e-10	-2.44968e-10	-2.23653e-10	-2.44721e-10
266	1.58064e-07	1.86859e-09	-1.90849e-10	-1.36018e-10	-2.31261e-10	7.75822e-10	3.2338e-07	2.19206e-09	8.19154e-11	4.58177e-10	-2.10066e-10	-2.47825e-10	-2.35649e-10	-2.13626e-10
273	1.5806e-07	1.81571e-09	-1.94133e-10	-1.13853e-10	-2.24594e-10	7.55606e-10	3.24069e-07	2.13163e-09	1.1566e-10	3.94473e-10	-2.3053e-10	-2.48195e-10	-2.56599e-10	-2.42714e-10
280	1.58109e-07	1.85897e-09	-1.84138e-10	-1.50349e-10	-2.24389e-10	7.39531e-10	3.24438e-07	2.06001e-09	9.49323e-11	3.32484e-10	-2.44231e-10	-2.45969e-10	-2.3835e-10	-2.22222e-10
287	1.58086e-07	1.86256e-09	-2.01106e-10	-1.35593e-10	-2.30487e-10	7.17103e-10	3.24149e-07	1.98536e-09	1.13749e-10	3.27508e-10	-2.44381e-10	-2.40988e-10	-2.50444e-10	-2.37348e-10
294	1.58099e-07	1.85906e-09	-2.1091e-10	-1.53864e-10	-2.42429e-10	6.97514e-10	3.24238e-07	1.93502e-09	9.45737e-11	2.90736e-10	-2.36867e-10	-2.42864e-10	-2.48604e-10	-2.2292e-10
301	1.5812e-07	1.86277e-09	-2.03316e-10	-1.10136e-10	-2.36397e-10	6.87772e-10	3.24448e-07	1.89814e-09	7.37279e-11	2.52822e-10	-2.47477e-10	-2.32213e-10	-2.37791e-10	-2.38493e-10
308	1.58135e-07	1.85672e-09	-2.28687e-10	-1.66905e-10	-2.32171e-10	6.50708e-10	3.24918e-07	1.81293e-09	7.11842e-11	2.17565e-10	-2.40061e-10	-2.41735e-10	-2.43129e-10	-2.43994e-10
315	1.5818e-07	1.86612e-09	-2.14262e-10	-1.52165e-10	-2.25182e-10	6.57494e-10	3.24776e-07	1.74937e-09	6.26163e-11	2.15587e-10	-2.27431e-10	-2.55719e-10	-2.46565e-10	-2.36712e-10
322	1.5822e-07	1.82217e-09	-2.02965e-10	-1.63598e-10	-2.25938e-10	6.54394e-10	3.24914e-07	1.75126e-09	6.97968e-11	1.91207e-10	-2.34129e-10	-2.46256e-10	-2.33568e-10	-2.55865e-10
329	1.58232e-07	1.78428e-09	-1.98996e-10	-1.55281e-10	-2.30176e-10	6.35442e-10	3.25075e-07	1.73192e-09	4.86937e-11	1.50876e-10	-2.3596e-10	-2.1413e-10	-2.21322e-10	-2.49088e-10
336	1.58243e-07	1.8091e-09	-2.14156e-10	-1.60467e-10	-2.26988e-10	6.56162e-10	3.25144e-07	1.6661e-09	5.05785e-11	1.49583e-10	-2.52586e-10	-2.32041e-10	-2.29817e-10	-2.4063e-10
343	1.58249e-07	1.80575e-09	-2.31955e-10	-1.51307e-10	-2.30212e-10	6.32758e-10	3.25053e-07	1.59612e-09	7.42146e-11	1.02949e-10	-2.45016e-10	-2.45562e-10	-2.51304e-10	-2.38523e-10
350	1.58327e-07	1.80655e-09	-2.31109e-10	-1.37269e-10	-2.35795e-10	6.3256e-10	3.25525e-07	1.57839e-09	6.34461e-11	9.85134e-11	-2.36939e-10	-2.30953e-10	-2.24859e-10	-2.39123e-10
357	1.58268e-07	1.78456e-09	-2.33785e-10	-1.51602e-10	-2.43901e-10	6.04758e-10	3.25405e-07	1.55493e-09	4.01312e-11	7.44238e-11	-2.35748e-10	-2.29731e-10	-2.45242e-10	-2.36789e-10
364	1.58248e-07	1.79768e-09	-2.18013e-10	-1.39305e-10	-2.45371e-10	6.07965e-10	3.24869e-07	1.55215e-09	6.42362e-11	6.41018e-11	-2.45343e-10	-2.33844e-10	-2.53824e-10	-2.25836e-10
371	1.58235e-07	1.77915e-09	-2.09668e-10	-1.69335e-10	-2.51488e-10	5.99788e-10	3.25813e-07	1.4952e-09	3.99378e-11	3.98166e-11	-2.41044e-10	-2.31161e-10	-2.32367e-10	-2.54789e-10
378	1.58261e-07	1.81773e-09	-2.16023e-10	-1.43257e-10	-2.31701e-10	5.81416e-10	3.25425e-07	1.50793e-09	8.46044e-11	2.73449e-11	-2.46957e-10	-2.31897e-10	-2.47846e-10	-2.40114e-10
385	1.58284e-07	1.78152e-09	-2.13787e-10	-1.71723e-10	-2.25271e-10	5.98786e-10	3.252e-07	1.48666e-09	3.60433e-11	2.64549e-11	-2.30284e-10	-2.3559e-10	-2.44965e-10	-2.33438e-10
392	1.58311e-07	1.80474e-09	-2.1908e-10	-1.81482e-10	-2.34163e-10	5.43634e-10	3.25567e-07	1.43328e-09	3.7759e-11	5.17634e-11	-2.33912e-10	-2.29411e-10	-2.50248e-10	-2.14189e-10
399	1.58245e-07	1.80282e-09	-2.24785e-10	-1.75288e-10	-2.31383e-10	5.74749e-10	3.25767e-07	1.44556e-09	5.53635e-11	-3.58855e-12	-2.48186e-10	-2.42495e-10	-2.40601e-10	-2.44393e-10
406	1.58276e-07	1.77798e-09	-2.25725e-10	-1.69076e-10	-2.36453e-10	5.83701e-10	3.25177e-07	1.40115e-09	5.76224e-11	-1.00781e-11	-2.4541e-10	-2.42334e-10	-2.46515e-10	-2.50054e-10
413	1.58312e-07	1.76702e-09	-2.42245e-10	-1.49677e-10	-2.32386e-10	5.39752e-10	3.25702e-07	1.38777e-09	3.65906e-11	-2.50409e-11	-2.35729e-10	-2.31488e-10	-2.53274e-10	-2.31984e-10
420	1.58358e-07	1.81061e-09	-2.09896e-10	-1.48571e-10	-2.25244e-10	5.7489e-10	3.25939e-07	1.37554e-09	4.41954e-11	-2.80389e-11	-2.24706e-10	-2.29913e-10	-2.36005e-10	-2.30413e-10
427	1.5838e-07	1.81575e-09	-2.35836e-10	-1.68456e-10	-2.27934e-10	5.53064e-10	3.2528e-07	1.38101e-09	2.38342e-11	-1.94345e-11	-2.38494e-10	-2.44111e-10	-2.3532e-10	-2.16597e-10
434	1.58355e-07	1.78749e-09	-2.32027e-10	-1.67765e-10	-2.0297e-10	5.40523e-10	3.25616e-07	1.33016e-09	2.80074e-11	-1.45449e-11	-2.31315e-10	-2.42152e-10	-2.36499e-10	-2.40348e-10
441	1.58337e-07	1.78334e-09	-2.23255e-10	-1.5955e-10	-2.15453e-10	5.23698e-10	3.26062e-07	1.30991e-09	3.79144e-11	-5.55527e-11	-2.32811e-10	-2.47542e-10	-2.38264e-10	-2.21142e-10
448	1.58328e-07	1.77911e-09	-2.44671e-10	-1.73702e-10	-2.35802e-10	5.20212e-10	3.25516e-07	1.31647e-09	3.10947e-11	-6.83939e-11	-2.15299e-10	-2.38019e-10	-2.61044e-10	-2.32112e-10
455	1.58338e-07	1.77429e-09	-2.29382e-10	-1.72416e-10	-2.25279e-10	5.17608e-10	3.25249e-07	1.27879e-09	4.70705e-11	-4.59417e-11	-2.37907e-10	-2.40654e-10	-2.45846e-10	-2.50594e-10
462	1.5836e-07	1.77811e-09	-2.15759e-10	-1.65163e-10	-2.27133e-10	5.21788e-10	3.25935e-07	1.31737e-09	4.64721e-11	-7.22639e-11	-2.38969e-10	-2.19761e-10	-2.27223e-10	-2.35195e-10
469	1.58384e-07	1.77777e-09	-2.26745e-10	-1.71391e-10	-2.30934e-10	5.07362e-10	3.26012e-07	1.30297e-09	2.71789e-11	-6.80373e-11	-2.42622e-10	-2.50036e-10	-2.53015e-10	-2.51088e-10
476	1.58412e-07	1.75311e-09	-2.41057e-10	-1.63546e-10	-2.41178e-10	5.13982e-10	3.25552e-07	1.28771e-09	4.86299e-11	-9.84217e-11	-2.2949e-10	-2.17042e-10	-2.31569e-10	-2.44224e-10
483	1.58325e-07	1.79069e-09	-2.08821e-10	-1.71146e-10	-2.29193e-10	5.0497e-10	3.25838e-07	1.29635e-09	2.11387e-11	-7.29561e-11	-2.41034e-10	-2.40633e-10	-2.30174e-10	-2.45045e-10
490	1.58345e-07	1.76129e-09	-2.32674e-10	-1.58597e-10	-2.29141e-10	4.85489e-10	3.25684e-07	1.26232e-09	5.26029e-11	-8.82864e-11	-2.33355e-10	-2.18884e-10	-2.23612e-10	-2.45963e-10
497	1.58322e-07	1.7422e-09	-2.26409e-10	-1.75092e-10	-2.41687e-10	4.95257e-10	3.25323e-07	1.26634e-09	3.97728e-11	-8.9747e-11	-2.43749e-10	-2.288e-10	-2.35226e-10	-2.45492e-10
504	1.58345e-07	1.7344e-09	-2.30139e-10	-1.59568e-10	-2.48527e-10	4.92442e-10	3.25391e-07	1.23228e-09	4.01209e-11	-7.00493e-11	-2.28516e-10	-2.29647e-10	-2.43656e-10	-2.43772e-10
511	1.58354e-07	1.78625e-09	-2.3224e-10	-1.73508e-10	-2.38817e-10	4.90821e-10	3.25873e-07	1.23396e-09	1.11728e-11	-1.12827e-10	-2.46834e-10	-2.41471e-10	-2.28997e-10	-2.47548e-10
518	1.58373e-07	1.74688e-09	-2.35167e-10	-1.54371e-10	-2.35622e-10	4.82786e-10	3.25477e-07	1.2134e-09	3.91342e-11	-1.04883e-10	-2.30141e-10	-2.50111e-10	-2.41903e-10	-2.46194e-10
525	1.58378e-07	1.7201e-09	-2.40769e-10	-1.71452e-10	-2.2209e-10	4.70961e-10	3.25537e-07	1.23157e-09	2.62081e-11	-9.66851e-11	-2.27245e-10	-2.35494e-10	-2.58925e-10	-2.36282e-10
532	1.58354e-07	1.7619e-09	-2.3593e-10	-1.46414e-10	-2.31648e-10	4.84507e-10	3.26111e-07	1.2137e-09	2.23169e-11	-9.43636e-11	-2.27647e-10	-2.55397e-10	-2.45273e-10	-2.4428e-10
539	1.58349e-07	1.75653e-09	-2.39523e-10	-1.73185e-10	-2.52858e-10	4.83546e-10	3.2578e-07	1.24267e-09	6.05201e-12	-9.99793e-11	-2.33943e-10	-2.48602e-10	-2.41214e-10	-2.3965e-10
546	1.58347e-07	1.74453e-09	-2.41329e-10	-1.75622e-10	-2.33007e-10	4.62809e-10	3.25528e-07	1.23052e-09	3.54742e-11	-1.12313e-10	-2.33884e-10	-2.43899e-10	-2.50431e-10	-2.43998e-10
553	1.58336e-07	1.74401e-09	-2.36696e-10	-1.71519e-10	-2.20711e-10	4.51746e-10	3.25911e-07	1.23661e-09	3.30437e-11	-1.01564e-10	-2.44711e-10	-2.3116e-10	-2.41911e-10	-2.42709e-10
560	1.58349e-07	1.77538e-09	-2.27575e-10	-1.55481e-10	-2.15231e-10	4.75361e-10	3.2552e-07	1.20135e-09	4.39288e-11	-1.02735e-10	-2.43458e-10	-2.46826e-10	-2.44947e-10	-2.53185e-10
567	1.58336e-07	1.77003e-09	-2.27877e-10	-1.64259e-10	-2.29456e-10	4.65603e-10	3.25265e-07	1.20001e-09	4.39589e-11	-1.10742e-10	-2.35062e-10	-2.42152e-10	-2.41071e-10	-2.43307e-10
574	1.5836e-07	1.74603e-09	-2.27992e-10	-1.95102e-10	-2.45861e-10	4.52865e-10	3.25998e-07	1.18899e-09	2.24938e-11	-1.07746e-10	-2.47916e-10	-2.36694e-10	-2.43963e-10	-2.51391e-10
581	1.5832e-07	1.75689e-09	-2.11818e-10	-1.81649e-10	-2.39634e-10	4.72405e-10	3.25435e-07	1.20415e-09	1.23793e-11	-7.84685e-11	-2.28243e-10	-2.16751e-10	-2.48651e-10	-2.23777e-10
588	1.58345e-07	1.74487e-09	-2.36698e-10	-1.71754e-10	-2.24957e-10	4.62662e-10	3.25926e-07	1.22598e-09	3.70933e-11	-1.3269e-10	-2.32454e-10	-2.3632e-10	-2.32296e-10	-2.52429e-10
595	1.58364e-07	1.73213e-09	-2.47989e-10	-1.8421e-10	-2.34834e-10	4.45727e-10	3.26e-07	1.17771e-09	2.34206e-11	-1.2824e-10	-2.39153e-10	-2.32669e-10	-2.30406e-10	-2.27851e-10
602	1.58397e-07	1.76233e-09	-2.35363e-10	-1.66766e-10	-2.32564e-10	4.52552e-10	3.25715e-07	1.16358e-09	1.6642e-11	-1.12386e-10	-2.45266e-10	-2.54726e-10	-2.44907e-10	-2.36304e-10
609	1.5843e-07	1.73197e-09	-2.27122e-10	-1.78895e-10	-2.20196e-10	4.42791e-10	3.25348e-07	1.20882e-09	1.10907e-12	-1.30639e-10	-2.23086e-10	-2.34673e-10	-2.44047e-10	-2.42957e-10
616	1.58373e-07	1.75813e-09	-2.34665e-10	-1.70044e-10	-2.2488e-10	4.39846e-10	3.25827e-07	1.19262e-09	3.42641e-11	-1.14437e-10	-2.33893e-10	-2.35492e-10	-2.44197e-10	-2.47961e-10
623	1.58384e-07	1.78698e-09	-2.28591e-10	-1.74003e-10	-2.35806e-10	4.66096e-10	3.26042e-07	1.22295e-09	2.13827e-11	-1.17913e-10	-2.39574e-10	-2.29779e-10	-2.31405e-10	-2.24397e-10
630	1.58388e-07	1.75574e-09	-2.33154e-10	-1.82199e-10	-2.33746e-10	4.51031e-10	3.25563e-07	1.15804e-09	3.08896e-11	-1.54489e-10	-2.24482e-10	-2.22787e-10	-2.39399e-10	-2.39328e-10
637	1.58353e-07	1.71067e-09	-2.32039e-10	-1.67216e-10	-2.49064e-10	4.53882e-10	3.26026e-07	1.16355e-09	3.04519e-11	-1.39777e-10	-2.243e-10	-2.373e-10	-2.31906e-10	-2.4082e-10
644	1.58394e-07	1.76199e-09	-2.34936e-10	-1.60643e-10	-2.11599e-10	4.39518e-10	3.26284e-07	1.18936e-09	1.60002e-11	-1.4534e-10	-2.25671e-10	-2.36389e-10	-2.45266e-10	-2.50873e-10
651	1.58421e-07	1.72851e-09	-2.30853e-10	-1.71195e-10	-2.32891e-10	4.26012e-10	3.25619e-07	1.16053e-09	5.45322e-11	-1.33539e-10	-2.47505e-10	-2.43791e-10	-2.32904e-10	-2.44787e-10
658	1.5841e-07	1.73839e-09	-2.37386e-10	-1.81308e-10	-2.32622e-10	4.40394e-10	3.25335e-07	1.18354e-09	2.02178e-11	-1.28028e-10	-2.39789e-10	-2.43927e-10	-2.37556e-10	-2.62622e-10
665	1.58362e-07	1.76707e-09	-2.43314e-10	-1.51805e-10	-2.3685e-10	4.24886e-10	3.25921e-07	1.16534e-09	3.0008e-11	-1.55598e-10	-2.4446e-10	-2.39463e-10	-2.45262e-10	-2.3277e-10
672	1.58421e-07	1.70714e-09	-2.22576e-10	-1.7872e-10	-2.17879e-10	4.32779e-10	3.2601e-07	1.13015e-09	1.34197e-11	-1.51921e-10	-2.37447e-10	-2.48788e-10	-2.24525e-10	-2.41206e-10
679	1.58429e-07	1.73312e-09	-2.31829e-10	-1.6196e-10	-2.44887e-10	4.46205e-10	3.25859e-07	1.18201e-09	2.38444e-11	-1.55212e-10	-2.44853e-10	-2.53946e-10	-2.35632e-10	-2.34407e-10
686	1.58423e-07	1.7279e-09	-2.39896e-10	-1.89226e-10	-2.28497e-10	4.13086e-10	3.26325e-07	1.14733e-09	3.83157e-12	-1.45699e-10	-2.39746e-10	-2.45747e-10	-2.26822e-10	-2.24708e-10
693	1.58447e-07	1.7189e-09	-2.32513e-10	-1.85974e-10	-2.26973e-10	3.97808e-10	3.2591e-07	1.17281e-09	2.65672e-11	-1.37619e-10	-2.43962e-10	-2.37295e-10	-2.21505e-10	-2.38211e-10
700	1.58443e-07	1.73929e-09	-2.35791e-10	-1.86301e-10	-2.0411e-10	4.26431e-10	3.25595e-07	1.14457e-09	3.31337e-11	-1.42426e-10	-2.44399e-10	-2.5288e-10	-2.36123e-10	-2.38011e-10
707	1.58354e-07	1.73909e-09	-2.21364e-10	-1.66658e-10	-2.36942e-10	4.27287e-10	3.25762e-07	1.14986e-09	2.3447e-11	-1.25614e-10	-2.46003e-10	-2.35644e-10	-2.54347e-10	-2.35909e-10
714	1.58385e-07	1.75328e-09	-2.38425e-10	-1.81694e-10	-2.43783e-10	4.12919e-10	3.26202e-07	1.14125e-09	3.36752e-11	-1.65149e-10	-2.44108e-10	-2.40917e-10	-2.33231e-10	-2.37361e-10
721	1.58392e-07	1.73785e-09	-2.34118e-10	-1.73603e-10	-2.13739e-10	4.04817e-10	3.25563e-07	1.13487e-09	7.63438e-12	-1.23609e-10	-2.41433e-10	-2.32057e-10	-2.21134e-10	-2.25616e-10
728	1.58397e-07	1.75356e-09	-2.30155e-10	-1.71271e-10	-2.10444e-10	4.25298e-10	3.25872e-07	1.12333e-09	1.35705e-11	-1.31362e-10	-2.27871e-10	-2.44634e-10	-2.46365e-10	-2.3335e-10
735	1.58444e-07	1.73256e-09	-2.46339e-10	-1.63634e-10	-2.2875e-10	4.11706e-10	3.26039e-07	1.09536e-09	2.16016e-11	-1.59904e-10	-2.3129e-10	-2.46648e-10	-2.3798e-10	-2.51431e-10
742	1.58429e-07	1.7276e-09	-2.34075e-10	-1.70629e-10	-2.3293e-10	4.1698e-10	3.25644e-07	1.11786e-09	7.87107e-12	-1.57224e-10	-2.22899e-10	-2.54487e-10	-2.35678e-10	-2.39983e-10
749	1.58409e-07	1.71599e-09	-2.36741e-10	-1.53806e-10	-2.3546e-10	4.21697e-10	3.25783e-07	1.14919e-09	9.49161e-12	-1.51132e-10	-2.51342e-10	-2.48501e-10	-2.38039e-10	-2.48201e-10
756	1.58432e-07	1.70727e-09	-2.36978e-10	-1.69137e-10	-2.34161e-10	4.19272e-10	3.26021e-07	1.12675e-09	-2.98015e-13	-1.57538e-10	-2.45177e-10	-2.28144e-10	-2.30307e-10	-2.27754e-10
763	1.58433e-07	1.71581e-09	-2.397e-10	-1.7754e-10	-2.36211e-10	4.06616e-10	3.25958e-07	1.11972e-09	2.24092e-11	-1.59634e-10	-2.39534e-10	-2.34206e-10	-2.30216e-10	-2.40104e-10
770	1.58454e-07	1.74512e-09	-2.34564e-10	-1.74686e-10	-2.39014e-10	3.87545e-10	3.25482e-07	1.14081e-09	1.53189e-11	-1.40376e-10	-2.42196e-10	-2.39623e-10	-2.42873e-10	-2.30524e-10
777	1.58447e-07	1.68749e-09	-2.38541e-10	-1.76501e-10	-2.26674e-10	4.20252e-10	3.25981e-07	1.13112e-09	2.68029e-11	-1.4595e-10	-2.3204e-10	-2.27451e-10	-2.28754e-10	-2.54015e-10
784	1.58461e-07	1.72327e-09	-2.19816e-10	-1.9531e-10	-2.28143e-10	4.03632e-10	3.25915e-07	1.15379e-09	1.18307e-11	-1.3697e-10	-2.36922e-10	-2.55193e-10	-2.44973e-10	-2.33453e-10
791	1.58465e-07	1.68857e-09	-2.24238e-10	-1.78846e-10	-2.20644e-10	3.98647e-10	3.25845e-07	1.13556e-09	5.21928e-11	-1.4122e-10	-2.46559e-10	-2.489e-10	-2.55618e-10	-2.14059e-10
798	1.58508e-07	1.71569e-09	-2.38734e-10	-1.69243e-10	-2.25892e-10	4.00558e-10	3.25915e-07	1.12138e-09	1.48299e-11	-1.5478e-10	-2.1022e-10	-2.50816e-10	-2.31823e-10	-2.25998e-10
805	1.58455e-07	1.71395e-09	-2.36177e-10	-1.76855e-10	-2.17575e-10	3.86434e-10	3.26036e-07	1.15571e-09	3.95349e-11	-1.214e-10	-2.3653e-10	-2.36135e-10	-2.59007e-10	-2.37205e-10
812	1.58478e-07	1.69654e-09	-2.46877e-10	-1.69822e-10	-2.19615e-10	3.96769e-10	3.2535e-07	1.11672e-09	1.86368e-11	-1.42669e-10	-2.47644e-10	-2.54231e-10	-2.43786e-10	-2.39578e-10
819	1.58513e-07	1.70404e-09	-2.40621e-10	-1.64598e-10	-1.97459e-10	3.73355e-10	3.25681e-07	1.12127e-09	4.00916e-11	-1.52737e-10	-2.45892e-10	-2.36576e-10	-2.34536e-10	-2.33259e-10
826	1.58422e-07	1.7448e-09	-2.48214e-10	-1.63687e-10	-2.19028e-10	4.19835e-10	3.26456e-07	1.13359e-09	1.20476e-11	-1.49807e-10	-2.52152e-10	-2.46463e-10	-2.31474e-10	-2.47275e-10
833	1.58438e-07	1.69452e-09	-2.45715e-10	-1.89819e-10	-2.30437e-10	4.14778e-10	3.25716e-07	1.12728e-09	1.61905e-11	-1.45863e-10	-2.30139e-10	-2.2783e-10	-2.31229e-10	-2.49921e-10
840	1.58459e-07	1.72257e-09	-2.33046e-10	-1.62886e-10	-2.46996e-10	4.03953e-10	3.25917e-07	1.12229e-09	1.1979e-11	-1.32802e-10	-2.31897e-10	-2.47696e-10	-2.3285e-10	-2.32187e-10
847	1.5849e-07	1.68709e-09	-2.29799e-10	-1.65734e-10	-2.57026e-10	3.67946e-10	3.26352e-07	1.14141e-09	1.99845e-11	-1.6787e-10	-2.42514e-10	-2.30384e-10	-2.4297e-10	-2.37304e-10
854	1.58459e-07	1.71965e-09	-2.32776e-10	-1.83621e-10	-2.38364e-10	3.83762e-10	3.26039e-07	1.1389e-09	2.99228e-11	-1.53782e-10	-2.35061e-10	-2.39729e-10	-2.49649e-10	-2.04339e-10
861	1.58382e-07	1.74179e-09	-2.26154e-10	-1.6295e-10	-2.42478e-10	4.09491e-10	3.25872e-07	1.14877e-09	5.35591e-12	-1.59411e-10	-2.34922e-10	-2.58544e-10	-2.47161e-10	-2.12751e-10
868	1.58478e-07	1.70918e-09	-2.36165e-10	-1.78149e-10	-2.29897e-10	3.95056e-10	3.2616e-07	1.15698e-09	2.01597e-11	-1.27883e-10	-2.53797e-10	-2.43226e-10	-2.42438e-10	-2.37353e-10
875	1.58497e-07	1.75101e-09	-2.24887e-10	-1.7762e-10	-2.37159e-10	3.83244e-10	3.25814e-07	1.13652e-09	3.57638e-13	-1.56902e-10	-2.31331e-10	-2.42099e-10	-2.49141e-10	-2.5122e-10
882	1.58432e-07	1.72644e-09	-2.41756e-10	-1.70936e-10	-2.23146e-10	4.04617e-10	3.25967e-07	1.1366e-09	1.10936e-11	-1.33069e-10	-2.44678e-10	-2.25511e-10	-2.47046e-10	-2.22711e-10
889	1.58415e-07	1.71413e-09	-2.3309e-10	-1.5986e-10	-2.39648e-10	4.13104e-10	3.25946e-07	1.15011e-09	-7.11562e-12	-1.63175e-10	-2.47125e-10	-2.39812e-10	-2.49793e-10	-2.34594e-10
896	1.58471e-07	1.69462e-09	-2.35593e-10	-1.54147e-10	-2.15789e-10	3.66975e-10	3.26523e-07	1.10544e-09	3.4139e-11	-1.51812e-10	-2.46388e-10	-2.38314e-10	-2.52559e-10	-2.53451e-10
903	1.58438e-07	1.72725e-09	-2.42494e-10	-1.85562e-10	-2.28831e-10	3.61539e-10	3.25593e-07	1.09923e-09	1.42496e-11	-1.45222e-10	-2.32478e-10	-2.20923e-10	-2.406e-10	-2.42757e-10
910	1.58427e-07	1.72484e-09	-2.16497e-10	-1.82329e-10	-2.2461e-10	3.96376e-10	3.25873e-07	1.10881e-09	2.34995e-12	-1.52596e-10	-2.38486e-10	-2.37637e-10	-2.17662e-10	-2.36362e-10
917	1.58426e-07	1.69561e-09	-2.3499e-10	-1.80458e-10	-2.32704e-10	3.62181e-10	3.26325e-07	1.1157e-09	2.9531e-11	-1.26707e-10	-2.38255e-10	-2.44887e-10	-2.36444e-10	-2.5143e-10
924	1.58432e-07	1.7205e-09	-2.38529e-10	-1.7726e-10	-2.22266e-10	4.0865e-10	3.25859e-07	1.12829e-09	2.70108e-11	-1.39697e-10	-2.56766e-10	-2.34288e-10	-2.40732e-10	-2.46908e-10
931	1.58456e-07	1.72233e-09	-2.1995e-10	-1.84284e-10	-2.26143e-10	3.97029e-10	3.26193e-07	1.12223e-09	3.9263e-11	-1.55328e-10	-2.50038e-10	-2.47929e-10	-2.2858e-10	-2.35803e-10
938	1.58449e-07	1.73875e-09	-2.36799e-10	-1.67866e-10	-2.23184e-10	3.60773e-10	3.26484e-07	1.12014e-09	1.29315e-11	-1.39079e-10	-2.23166e-10	-2.46686e-10	-2.11438e-10	-2.47839e-10
945	1.58505e-07	1.71047e-09	-2.41315e-10	-1.73796e-10	-2.30368e-10	3.82282e-10	3.26206e-07	1.14472e-09	-1.41174e-12	-1.59439e-10	-2.42799e-10	-2.48487e-10	-2.4013e-10	-2.38264e-10
952	1.58545e-07	1.72695e-09	-2.48685e-10	-1.81678e-10	-2.39106e-10	3.76552e-10	3.25936e-07	1.11385e-09	1.58434e-11	-1.58587e-10	-2.3466e-10	-2.34745e-10	-2.46113e-10	-2.36158e-10
959	1.58503e-07	1.71672e-09	-2.36033e-10	-1.83451e-10	-2.2412e-10	3.72789e-10	3.26167e-07	1.09393e-09	2.72371e-11	-1.55344e-10	-2.50642e-10	-2.32002e-10	-2.37088e-10	-2.37205e-10
966	1.58549e-07	1.72587e-09	-2.56496e-10	-1.86336e-10	-2.41398e-10	3.82683e-10	3.26539e-07	1.10148e-09	5.88197e-12	-1.67772e-10	-2.41193e-10	-2.30607e-10	-2.58499e-10	-2.47323e-10
973	1.5851e-07	1.69059e-09	-2.23412e-10	-1.91808e-10	-2.21279e-10	3.5002e-10	3.25488e-07	1.12462e-09	6.28613e-14	-1.81493e-10	-2.36249e-10	-2.30618e-10	-2.42854e-10	-2.25686e-10
980	1.58465e-07	1.74433e-09	-2.30832e-10	-1.75029e-10	-2.34093e-10	3.6886e-10	3.25973e-07	1.10292e-09	1.08282e-11	-1.35631e-10	-2.44998e-10	-2.29759e-10	-2.28442e-10	-2.5989e-10
987	1.58511e-07	1.72844e-09	-2.19593e-10	-1.87097e-10	-2.45136e-10	3.75515e-10	3.2677e-07	1.13723e-09	1.71617e-11	-1.52133e-10	-2.26443e-10	-2.2263e-10	-2.55409e-10	-2.31129e-10
994	1.58548e-07	1.74768e-09	-2.3004e-10	-1.6453e-10	-2.40685e-10	3.47333e-10	3.26293e-07	1.15059e-09	-2.15053e-11	-1.56455e-10	-2.35886e-10	-2.30897e-10	-2.38791e-10	-2.49233e-10
1001	1.58574e-07	1.70531e-09	-2.46595e-10	-2.0269e-10	-2.38508e-10	3.47237e-10	3.2569e-07	1.13887e-09	8.56434e-13	-1.69607e-10	-2.445e-10	-2.54295e-10	-2.38492e-10	-2.52986e-10
1008	1.58609e-07	1.71822e-09	-2.26627e-10	-1.82635e-10	-2.2452e-10	3.76667e-10	3.26256e-07	1.10085e-09	1.5401e-11	-1.4577e-10	-2.49683e-10	-2.45564e-10	-2.26274e-10	-2.28273e-10
1015	1.5858e-07	1.7206e-09	-2.45981e-10	-1.71656e-10	-2.33246e-10	3.67184e-10	3.26397e-07	1.14077e-09	3.53762e-11	-1.54969e-10	-2.39666e-10	-2.48224e-10	-2.26612e-10	-2.37685e-10
1022	1.58559e-07	1.6893e-09	-2.27685e-10	-1.66983e-10	-2.35193e-10	3.6192e-10	3.25953e-07	1.10253e-09	9.24982e-12	-1.40758e-10	-2.21177e-10	-2.41673e-10	-2.56438e-10	-2.42727e-10
1029	1.5852e-07	1.72506e-09	-2.08004e-10	-1.89201e-10	-2.41158e-10	3.39166e-10	3.26452e-07	1.08724e-09	8.55308e-12	-1.51978e-10	-2.39419e-10	-2.43919e-10	-2.31592e-10	-2.37397e-10
1036	1.5855e-07	1.69978e-09	-2.39424e-10	-1.77294e-10	-2.31325e-10	3.58204e-10	3.26053e-07	1.12439e-09	1.60972e-11	-1.70352e-10	-2.3828e-10	-2.27709e-10	-2.36769e-10	-2.40201e-10
1043	1.58611e-07	1.71536e-09	-2.52895e-10	-1.70339e-10	-2.20436e-10	3.57714e-10	3.26142e-07	1.10885e-09	-2.19197e-12	-1.60883e-10	-2.60806e-10	-2.32307e-10	-2.31422e-10	-2.30581e-10
1050	1.5858e-07	1.69541e-09	-2.28169e-10	-1.86645e-10	-2.19134e-10	3.67402e-10	3.25889e-07	1.11493e-09	3.25423e-11	-1.73791e-10	-2.2743e-10	-2.43277e-10	-2.34943e-10	-2.41344e-10
1057	1.58504e-07	1.70971e-09	-2.35957e-10	-1.80974e-10	-2.41107e-10	3.70401e-10	3.26483e-07	1.13508e-09	2.65228e-11	-1.54522e-10	-2.31838e-10	-2.29279e-10	-2.33403e-10	-2.29732e-10
1064	1.58484e-07	1.72145e-09	-2.34803e-10	-1.70831e-10	-2.28528e-10	3.67911e-10	3.262e-07	1.12455e-09	2.51651e-11	-1.37154e-10	-2.48268e-10	-2.51225e-10	-2.46472e-10	-2.4322e-10
1071	1.58588e-07	1.67715e-09	-2.46778e-10	-1.89403e-10	-2.56528e-10	3.55421e-10	3.26017e-07	1.10706e-09	-6.74303e-12	-1.51133e-10	-2.32613e-10	-2.34196e-10	-2.57263e-10	-2.27667e-10
1078	1.58589e-07	1.73471e-09	-2.26511e-10	-1.83245e-10	-2.2458e-10	3.59308e-10	3.26179e-07	1.1297e-09	2.20618e-11	-1.48845e-10	-2.468e-10	-2.23981e-10	-2.42069e-10	-2.34311e-10
1085	1.58631e-07	1.71793e-09	-2.36683e-10	-1.81783e-10	-2.3815e-10	3.60024e-10	3.26526e-07	1.07878e-09	2.88781e-11	-1.41573e-10	-2.40661e-10	-2.53653e-10	-2.39595e-10	-2.43995e-10
1092	1.58717e-07	1.7256e-09	-1.99495e-10	-1.96112e-10	-2.17874e-10	3.99791e-10	3.26182e-07	1.1158e-09	9.15877e-13	-1.30195e-10	-2.40794e-10	-2.51129e-10	-2.3535e-10	-2.53696e-10
1099	1.58604e-07	1.71823e-09	-2.43177e-10	-1.5772e-10	-2.41189e-10	3.78046e-10	3.26029e-07	1.11091e-09	1.43753e-11	-1.59507e-10	-2.22673e-10	-2.3161e-10	-2.40318e-10	-2.44169e-10
1106	1.58579e-07	1.72749e-09	-2.53119e-10	-1.8296e-10	-2.37849e-10	3.42966e-10	3.2601e-07	1.0991e-09	7.22862e-12	-1.45124e-10	-2.36679e-10	-2.24766e-10	-2.40673e-10	-2.34896e-10
1113	1.58605e-07	1.71796e-09	-2.43583e-10	-1.83177e-10	-2.36992e-10	3.96826e-10	3.26281e-07	1.07732e-09	1.88048e-11	-1.37853e-10	-2.27211e-10	-2.39281e-10	-2.35628e-10	-2.44684e-10
1120	1.58551e-07	1.71834e-09	-2.35339e-10	-1.75411e-10	-2.406e-10	3.54709e-10	3.25965e-07	1.10417e-09	1.27148e-11	-1.63745e-10	-2.45898e-10	-2.4562e-10	-2.36345e-10	-2.39001e-10
1127	1.58554e-07	1.72654e-09	-2.50642e-10	-1.66466e-10	-2.39623e-10	3.73681e-10	3.26065e-07	1.09502e-09	6.74409e-12	-1.49577e-10	-2.34819e-10	-2.53074e-10	-2.28176e-10	-2.35909e-10
1134	1.58569e-07	1.67268e-09	-2.4222e-10	-1.68804e-10	-2.27372e-10	3.72263e-10	3.26343e-07	1.11302e-09	2.02973e-12	-1.6864e-10	-2.40541e-10	-2.48205e-10	-2.52064e-10	-2.36939e-10
1141	1.58558e-07	1.71827e-09	-2.44826e-10	-1.76401e-10	-2.30866e-10	3.57616e-10	3.25586e-07	1.12652e-09	1.02491e-12	-1.73773e-10	-2.44926e-10	-2.41926e-10	-2.43193e-10	-2.46727e-10
1148	1.58547e-07	1.69365e-09	-2.41425e-10	-1.7549e-10	-2.37889e-10	3.68805e-10	3.25765e-07	1.09926e-09	2.25109e-11	-1.43191e-10	-2.41323e-10	-2.4032e-10	-2.40186e-10	-2.42487e-10
1155	1.58559e-07	1.6849e-09	-2.42009e-10	-1.92969e-10	-2.61941e-10	3.47749e-10	3.26434e-07	1.0948e-09	7.88763e-13	-1.60852e-10	-2.35923e-10	-2.43685e-10	-2.44602e-10	-2.36394e-10
1162	1.58556e-07	1.71644e-09	-2.35598e-10	-1.73918e-10	-2.46997e-10	3.81012e-10	3.26646e-07	1.12944e-09	6.86853e-12	-1.4407e-10	-2.32568e-10	-2.45026e-10	-2.42275e-10	-2.19058e-10
1169	1.58598e-07	1.69634e-09	-2.4007e-10	-1.7289e-10	-2.30445e-10	3.69096e-10	3.25721e-07	1.09261e-09	-5.51522e-12	-1.51763e-10	-2.34908e-10	-2.4488e-10	-2.44882e-10	-2.27166e-10
1176	1.58569e-07	1.7115e-09	-2.15341e-10	-1.73812e-10	-2.44281e-10	3.60114e-10	3.2622e-07	1.10213e-09	4.56066e-11	-1.60027e-10	-2.49812e-10	-2.31102e-10	-2.3347e-10	-2.43851e-10
1183	1.58583e-07	1.71119e-09	-2.29032e-10	-1.58594e-10	-2.26466e-10	3.57994e-10	3.26216e-07	1.132e-09	1.07463e-11	-1.70755e-10	-2.40704e-10	-2.45934e-10	-2.25811e-10	-2.3031e-10
1190	1.58555e-07	1.72611e-09	-2.41617e-10	-1.68594e-10	-2.40073e-10	3.47403e-10	3.26023e-07	1.11384e-09	2.26361e-11	-1.32548e-10	-2.48201e-10	-2.33537e-10	-2.4566e-10	-2.54589e-10
1197	1.58611e-07	1.74484e-09	-2.53903e-10	-1.82031e-10	-2.3901e-10	3.38412e-10	3.25794e-07	1.10499e-09	-2.44103e-12	-1.53672e-10	-2.3257e-10	-2.18468e-10	-2.35801e-10	-2.44233e-10
1204	1.58625e-07	1.69873e-09	-2.47705e-10	-1.68192e-10	-2.28259e-10	3.6263e-10	3.25752e-07	1.12019e-09	7.3121e-12	-1.65072e-10	-2.37853e-10	-2.28791e-10	-2.33008e-10	-2.41095e-10
1211	1.58624e-07	1.67917e-09	-2.47055e-10	-1.85515e-10	-2.34182e-10	3.67462e-10	3.26608e-07	1.1325e-09	1.4451e-11	-1.72513e-10	-2.388e-10	-2.55884e-10	-2.4522e-10	-2.62984e-10
1218	1.58614e-07	1.70564e-09	-2.40466e-10	-1.91706e-10	-2.27391e-10	3.58497e-10	3.25915e-07	1.11454e-09	2.98716e-12	-1.70976e-10	-2.46127e-10	-2.47695e-10	-2.4197e-10	-2.51815e-10
1225	1.58548e-07	1.72576e-09	-2.46836e-10	-1.70886e-10	-2.38595e-10	3.46352e-10	3.25408e-07	1.08596e-09	3.00748e-11	-1.63638e-10	-2.51303e-10	-2.43814e-10	-2.44416e-10	-2.59497e-10
1232	1.58567e-07	1.72429e-09	-2.35153e-10	-1.80503e-10	-2.23035e-10	3.71883e-10	3.26073e-07	1.09975e-09	3.12654e-11	-1.48007e-10	-2.50279e-10	-2.30152e-10	-2.51136e-10	-2.53596e-10
1239	1.58612e-07	1.6776e-09	-2.44004e-10	-1.70255e-10	-2.34615e-10	3.84595e-10	3.25987e-07	1.08148e-09	-1.24116e-11	-1.68873e-10	-2.43016e-10	-2.4838e-10	-2.4547e-10	-2.31329e-10
1246	1.58603e-07	1.71459e-09	-2.08825e-10	-1.66896e-10	-2.28906e-10	3.6796e-10	3.25542e-07	1.1251e-09	1.48733e-11	-1.54477e-10	-2.25652e-10	-2.48097e-10	-2.33262e-10	-2.40121e-10
1253	1.58615e-07	1.71105e-09	-2.27736e-10	-1.77549e-10	-2.12827e-10	3.46315e-10	3.25582e-07	1.12407e-09	1.28025e-11	-1.66169e-10	-2.43597e-10	-2.32857e-10	-2.12396e-10	-2.3437e-10
1260	1.58538e-07	1.70495e-09	-2.28853e-10	-1.56395e-10	-2.21622e-10	3.60575e-10	3.25685e-07	1.0892e-09	7.7526e-12	-1.60852e-10	-2.2976e-10	-2.352e-10	-2.56266e-10	-2.46034e-10
1267	1.58532e-07	1.71878e-09	-2.31211e-10	-1.87512e-10	-2.27463e-10	3.51783e-10	3.26268e-07	1.08324e-09	9.58674e-12	-1.66142e-10	-2.36066e-10	-2.36081e-10	-2.33574e-10	-2.50393e-10
1274	1.5856e-07	1.71125e-09	-2.51291e-10	-1.84796e-10	-2.26062e-10	3.5202e-10	3.25569e-07	1.08996e-09	1.12708e-12	-1.62655e-10	-2.60531e-10	-2.32203e-10	-2.55158e-10	-2.51917e-10
1281	1.5859e-07	1.6997e-09	-2.19759e-10	-1.74549e-10	-2.41032e-10	3.54072e-10	3.25794e-07	1.10838e-09	1.3752e-11	-1.65385e-10	-2.46098e-10	-2.45172e-10	-2.33377e-10	-2.4224e-10
1288	1.58582e-07	1.69426e-09	-2.37848e-10	-1.84582e-10	-2.39619e-10	3.67373e-10	3.25969e-07	1.09677e-09	5.95778e-12	-1.56827e-10	-2.45219e-10	-2.52028e-10	-2.24138e-10	-2.38356e-10
1295	1.58578e-07	1.71267e-09	-2.31346e-10	-1.81677e-10	-2.30946e-10	3.27128e-10	3.26355e-07	1.09217e-09	1.52507e-11	-1.48057e-10	-2.45997e-10	-2.27614e-10	-2.41677e-10	-2.52641e-10
1302	1.58634e-07	1.69811e-09	-2.45978e-10	-1.61474e-10	-2.41161e-10	3.57771e-10	3.25695e-07	1.0982e-09	3.2291e-11	-1.50695e-10	-2.39716e-10	-2.36207e-10	-2.59779e-10	-2.38274e-10
1309	1.58606e-07	1.68046e-09	-2.22569e-10	-1.85025e-10	-2.58518e-10	3.35542e-10	3.25785e-07	1.11294e-09	5.06196e-13	-1.79871e-10	-2.39572e-10	-2.4577e-10	-2.29634e-10	-2.36567e-10
1316	1.5862e-07	1.70063e-09	-2.37446e-10	-1.68009e-10	-2.49652e-10	3.4409e-10	3.26216e-07	1.07584e-09	-1.02114e-11	-1.69464e-10	-2.50769e-10	-2.43274e-10	-2.4407e-10	-2.44806e-10
1323	1.58602e-07	1.70705e-09	-2.2275e-10	-1.75455e-10	-2.43592e-10	3.72919e-10	3.2566e-07	1.08824e-09	1.77706e-11	-1.72917e-10	-2.4206e-10	-2.56085e-10	-2.39646e-10	-2.33372e-10
1330	1.58578e-07	1.67731e-09	-2.36558e-10	-1.78305e-10	-2.50875e-10	3.72806e-10	3.25501e-07	1.097e-09	7.20221e-12	-1.41037e-10	-2.45586e-10	-2.3794e-10	-2.34742e-10	-2.35806e-10
1337	1.58596e-07	1.68263e-09	-2.4052e-10	-1.76383e-10	-2.2813e-10	3.40305e-10	3.25734e-07	1.0809e-09	1.15445e-11	-1.66316e-10	-2.16698e-10	-2.5795e-10	-2.46177e-10	-2.46265e-10
1344	1.58642e-07	1.70271e-09	-2.25814e-10	-1.99265e-10	-2.35237e-10	3.59444e-10	3.26411e-07	1.09555e-09	1.92221e-11	-1.62772e-10	-2.49992e-10	-2.37091e-10	-2.44217e-10	-2.32772e-10
1351	1.58641e-07	1.72408e-09	-2.33405e-10	-1.41868e-10	-2.45474e-10	3.46285e-10	3.25854e-07	1.11509e-09	7.67682e-12	-1.56166e-10	-2.38675e-10	-2.38925e-10	-2.56551e-10	-2.6531e-10
1358	1.58657e-07	1.69695e-09	-2.28383e-10	-1.67242e-10	-2.45307e-10	3.41627e-10	3.25717e-07	1.08486e-09	-4.95299e-12	-1.60976e-10	-2.39568e-10	-2.51175e-10	-2.42562e-10	-2.58331e-10
1365	1.58661e-07	1.7094e-09	-2.32912e-10	-1.8796e-10	-2.3385e-10	3.48637e-10	3.26142e-07	1.0788e-09	3.74945e-13	-1.56039e-10	-2.53976e-10	-2.36407e-10	-2.48168e-10	-2.36487e-10
1372	1.58657e-07	1.67761e-09	-2.33856e-10	-1.79577e-10	-2.48109e-10	3.62557e-10	3.26367e-07	1.09921e-09	2.34274e-11	-1.75212e-10	-2.51065e-10	-2.43687e-10	-2.34699e-10	-2.27396e-10
1379	1.58649e-07	1.71838e-09	-2.24742e-10	-1.90606e-10	-2.23447e-10	3.48916e-10	3.26023e-07	1.09251e-09	2.81352e-11	-1.71348e-10	-2.55778e-10	-2.46023e-10	-2.53599e-10	-2.3291e-10
1386	1.58694e-07	1.70595e-09	-2.31406e-10	-1.70265e-10	-2.21759e-10	3.69049e-10	3.25867e-07	1.10888e-09	1.07669e-11	-1.4618e-10	-2.1941e-10	-2.55758e-10	-2.54479e-10	-2.45702e-10
1393	1.58621e-07	1.73681e-09	-2.42246e-10	-1.99904e-10	-2.28671e-10	3.34216e-10	3.26221e-07	1.08594e-09	5.75178e-12	-1.30356e-10	-2.51257e-10	-2.5509e-10	-2.37107e-10	-2.55602e-10
1400	1.58661e-07	1.70878e-09	-2.31991e-10	-1.63247e-10	-2.45189e-10	3.78127e-10	3.26253e-07	1.10846e-09	1.01045e-11	-1.61581e-10	-2.24444e-10	-2.3336e-10	-2.38211e-10	-2.32265e-10
1407	1.58684e-07	1.67412e-09	-2.30765e-10	-1.78632e-10	-2.28345e-10	3.44117e-10	3.26224e-07	1.09473e-09	-6.70899e-12	-1.43302e-10	-2.25271e-10	-2.28884e-10	-2.38323e-10	-2.37075e-10
1414	1.58685e-07	1.70321e-09	-2.35773e-10	-1.78321e-10	-2.33108e-10	3.60908e-10	3.2613e-07	1.10643e-09	-1.58507e-11	-1.47764e-10	-2.44682e-10	-2.39664e-10	-2.45816e-10	-2.32346e-10
1421	1.58684e-07	1.69832e-09	-2.44333e-10	-1.68571e-10	-2.41697e-10	3.24398e-10	3.2621e-07	1.07374e-09	1.16191e-14	-1.7565e-10	-2.44963e-10	-2.50742e-10	-2.31465e-10	-2.40352e-10
1428	1.5868e-07	1.71434e-09	-2.33039e-10	-1.67952e-10	-2.37571e-10	3.32608e-10	3.26236e-07	1.10193e-09	1.99086e-11	-1.69386e-10	-2.48359e-10	-2.40773e-10	-2.34086e-10	-2.42456e-10
1435	1.5871e-07	1.69684e-09	-2.29417e-10	-1.90986e-10	-2.44507e-10	3.43288e-10	3.25791e-07	1.0728e-09	-6.11836e-12	-1.42546e-10	-2.40603e-10	-2.44097e-10	-2.55232e-10	-2.34594e-10
1442	1.58695e-07	1.69204e-09	-2.27103e-10	-1.75562e-10	-2.24748e-10	3.43938e-10	3.26098e-07	1.06179e-09	2.84766e-11	-1.67428e-10	-2.3111e-10	-2.36312e-10	-2.42502e-10	-2.48131e-10
1449	1.58696e-07	1.69982e-09	-2.28238e-10	-1.89991e-10	-2.32199e-10	3.43301e-10	3.26479e-07	1.09798e-09	-5.70443e-12	-1.64529e-10	-2.34962e-10	-2.54502e-10	-2.38065e-10	-2.41502e-10
1456	1.58696e-07	1.68897e-09	-2.38288e-10	-1.91079e-10	-2.37336e-10	3.47095e-10	3.25831e-07	1.11436e-09	-3.4526e-12	-1.66479e-10	-2.28895e-10	-2.35808e-10	-2.16794e-10	-2.41544e-10
1463	1.58675e-07	1.69154e-09	-2.34282e-10	-1.57695e-10	-2.13238e-10	3.3032e-10	3.25917e-07	1.09579e-09	3.15198e-11	-1.78079e-10	-2.33192e-10	-2.43852e-10	-2.50484e-10	-2.18874e-10
1470	1.58711e-07	1.69509e-09	-2.36391e-10	-1.68005e-10	-2.2609e-10	3.15891e-10	3.26259e-07	1.09495e-09	3.41141e-11	-1.8197e-10	-2.53718e-10	-2.47695e-10	-2.43164e-10	-2.4735e-10
1477	1.58677e-07	1.68642e-09	-2.43107e-10	-1.76181e-10	-2.30959e-10	3.26076e-10	3.26246e-07	1.13095e-09	1.46725e-11	-1.55567e-10	-2.37599e-10	-2.45193e-10	-2.48175e-10	-2.62537e-10
1484	1.58649e-07	1.66429e-09	-2.19332e-10	-1.79849e-10	-2.19516e-10	3.3012e-10	3.25998e-07	1.10109e-09	2.01351e-11	-1.86047e-10	-2.37417e-10	-2.4972e-10	-2.4157e-10	-2.37907e-10
1491	1.58717e-07	1.75286e-09	-2.41123e-10	-1.50163e-10	-2.26309e-10	3.40122e-10	3.25975e-07	1.08165e-09	1.26517e-11	-1.63376e-10	-2.4959e-10	-2.46583e-10	-2.29037e-10	-2.34749e-10
1498	1.58717e-07	1.7111e-09	-2.34122e-10	-1.77154e-10	-2.20018e-10	3.46515e-10	3.26351e-07	1.10346e-09	2.4644e-11	-1.64566e-10	-2.48208e-10	-2.24181e-10	-2.32227e-10	-2.54815e-10
1505	1.58717e-07	1.70943e-09	-2.38063e-10	-1.6598e-10	-2.31967e-10	3.38793e-10	3.2588e-07	1.12207e-09	-1.23966e-11	-1.68295e-10	-2.40654e-10	-2.36713e-10	-2.31031e-10	-2.52972e-10
1512	1.58685e-07	1.69362e-09	-2.37685e-10	-1.72526e-10	-2.21324e-10	3.24472e-10	3.25831e-07	1.08227e-09	1.26146e-11	-1.72428e-10	-2.32815e-10	-2.40943e-10	-2.42253e-10	-2.37589e-10
1519	1.58656e-07	1.73352e-09	-2.37155e-10	-1.74739e-10	-2.40069e-10	3.47207e-10	3.26339e-07	1.09042e-09	2.2642e-12	-1.49777e-10	-2.22994e-10	-2.28631e-10	-2.31015e-10	-2.35552e-10
1526	1.58717e-07	1.69744e-09	-2.477e-10	-1.80893e-10	-2.27082e-10	3.5521e-10	3.26409e-07	1.11056e-09	1.62771e-11	-1.76512e-10	-2.14687e-10	-2.19753e-10	-2.46912e-10	-2.35032e-10
1533	1.58699e-07	1.71278e-09	-2.37337e-10	-1.78526e-10	-2.39363e-10	3.42624e-10	3.26056e-07	1.10217e-09	3.0215e-12	-1.76395e-10	-2.47129e-10	-2.57559e-10	-2.36726e-10	-2.48401e-10
1540	1.58609e-07	1.72407e-09	-2.23327e-10	-1.66457e-10	-2.41575e-10	3.47047e-10	3.2589e-07	1.08336e-09	-4.40132e-12	-1.80032e-10	-2.70399e-10	-2.32014e-10	-2.25117e-10	-2.51605e-10
1547	1.58631e-07	1.69142e-09	-2.40976e-10	-1.69883e-10	-2.40799e-10	3.32456e-10	3.26276e-07	1.0894e-09	2.38426e-12	-1.5689e-10	-2.54898e-10	-2.46113e-10	-2.45026e-10	-2.34664e-10
1554	1.58636e-07	1.67364e-09	-2.47519e-10	-1.92072e-10	-2.36489e-10	3.49893e-10	3.26178e-07	1.09424e-09	3.59857e-11	-1.55604e-10	-2.43026e-10	-2.43683e-10	-2.50428e-10	-2.39766e-10
OAA_2 (total pressure = 0.025 bar, furnace T = 86.7 °C, initial reactor position = 6 mm)
Time (s)	Total signal intesity	m/z 2	m/z 12	m/z 14	m/z 15	m/z 18	m/z 40	m/z 28	m/z 32	m/z 44	m/z 33	m/z 34	m/z 48	m/z 64
0	1.54529e-07	1.64778e-09	-2.2244e-10	-1.74933e-10	-2.16613e-10	2.43857e-10	3.10517e-07	9.142e-10	-2.12926e-11	-1.78713e-10	-2.25223e-10	-2.42685e-10	-2.48717e-10	-2.52344e-10
7	1.54089e-07	1.62638e-09	-2.52971e-10	-1.8478e-10	-2.39525e-10	2.52919e-10	3.10723e-07	9.16971e-10	-2.84337e-11	-1.88171e-10	-2.29991e-10	-2.48146e-10	-2.45324e-10	-2.42266e-10
14	1.5403e-07	1.63912e-09	-2.15846e-10	-1.77979e-10	-2.20412e-10	2.27531e-10	3.11375e-07	9.33739e-10	-3.16258e-11	-1.78664e-10	-2.53128e-10	-2.35186e-10	-2.37983e-10	-2.35985e-10
21	1.54001e-07	1.59602e-09	-2.48406e-10	-1.72827e-10	-2.31524e-10	2.6241e-10	3.11045e-07	8.92638e-10	-2.9356e-11	-1.73515e-10	-2.32518e-10	-2.28728e-10	-2.35131e-10	-2.39033e-10
28	1.53984e-07	1.63084e-09	-2.4042e-10	-1.72285e-10	-2.47161e-10	2.16529e-10	3.11321e-07	9.17082e-10	-2.5705e-11	-1.71869e-10	-2.18886e-10	-2.25938e-10	-2.45479e-10	-2.34512e-10
35	1.53996e-07	1.61062e-09	-2.3256e-10	-1.77432e-10	-2.39475e-10	2.53797e-10	3.11309e-07	9.18919e-10	-2.34881e-11	-1.83364e-10	-2.28091e-10	-2.37157e-10	-2.46715e-10	-2.45454e-10
42	1.53946e-07	1.58764e-09	-2.3524e-10	-1.71853e-10	-2.39526e-10	2.06425e-10	3.10932e-07	9.19967e-10	-5.23408e-11	-1.96709e-10	-2.34813e-10	-2.43912e-10	-2.35564e-10	-2.45065e-10
49	1.54196e-07	1.60616e-09	-2.41173e-10	-1.61125e-10	-2.33536e-10	2.41495e-10	3.11871e-07	1.16434e-09	-4.53675e-12	-1.46199e-10	-2.37595e-10	-2.52863e-10	-2.35763e-10	-2.30637e-10
56	1.5418e-07	1.64296e-09	-2.20766e-10	-1.34007e-10	-2.3884e-10	2.86802e-10	3.099e-07	2.3852e-09	9.44226e-11	3.81032e-10	-2.41686e-10	-2.42078e-10	-2.4653e-10	-2.41259e-10
63	1.53659e-07	1.61691e-09	-1.60987e-10	-1.03999e-10	-2.38203e-10	3.99485e-10	3.07596e-07	3.45669e-09	1.81261e-10	1.38301e-09	-2.26056e-10	-2.2864e-10	-2.36732e-10	-2.29684e-10
70	1.53027e-07	1.67401e-09	-1.27801e-10	-1.10964e-10	-2.25736e-10	4.96375e-10	3.05539e-07	4.12289e-09	2.11474e-10	2.26794e-09	-2.24775e-10	-2.14708e-10	-2.29225e-10	-2.28053e-10
77	1.52574e-07	1.68163e-09	-8.66498e-11	-1.16186e-10	-2.413e-10	6.45891e-10	3.03631e-07	4.48376e-09	2.03083e-10	2.81033e-09	-2.37234e-10	-2.39179e-10	-2.16676e-10	-2.41764e-10
84	1.52316e-07	1.71268e-09	-6.91095e-11	-7.65493e-11	-2.15089e-10	7.36482e-10	3.03441e-07	4.63766e-09	2.16819e-10	2.95542e-09	-2.24699e-10	-2.35628e-10	-2.40963e-10	-2.532e-10
91	1.52315e-07	1.74168e-09	-6.31928e-11	-1.07068e-10	-2.28486e-10	7.99451e-10	3.03601e-07	4.68161e-09	1.74432e-10	2.9712e-09	-2.22676e-10	-2.30728e-10	-2.30884e-10	-2.34146e-10
98	1.52371e-07	1.76656e-09	-4.75446e-11	-1.00448e-10	-2.29423e-10	8.27886e-10	3.03827e-07	4.55475e-09	1.58996e-10	2.81423e-09	-2.31144e-10	-2.40396e-10	-2.16672e-10	-2.36424e-10
105	1.52533e-07	1.80937e-09	-7.00301e-11	-1.12226e-10	-2.08417e-10	8.31348e-10	3.04699e-07	4.36565e-09	1.62709e-10	2.64161e-09	-2.40544e-10	-2.47342e-10	-2.31904e-10	-2.42903e-10
112	1.52696e-07	1.8398e-09	-9.18809e-11	-9.69402e-11	-2.12131e-10	8.72661e-10	3.04775e-07	4.19925e-09	1.62876e-10	2.44745e-09	-2.39788e-10	-2.04459e-10	-2.39902e-10	-2.38099e-10
119	1.52738e-07	1.81544e-09	-1.01466e-10	-1.1466e-10	-2.38862e-10	8.76341e-10	3.05842e-07	4.02148e-09	1.38836e-10	2.28787e-09	-2.3958e-10	-2.51266e-10	-2.4013e-10	-2.42251e-10
126	1.52915e-07	1.83221e-09	-6.62653e-11	-1.08034e-10	-2.12884e-10	8.92753e-10	3.06311e-07	3.85418e-09	1.20837e-10	2.13276e-09	-2.35453e-10	-2.35739e-10	-2.30381e-10	-2.49166e-10
133	1.53793e-07	1.86883e-09	-1.06139e-10	-1.17052e-10	-2.0578e-10	8.84039e-10	3.08562e-07	3.65167e-09	1.09328e-10	1.94561e-09	-2.23716e-10	-2.06017e-10	-2.46118e-10	-2.35947e-10
140	1.54449e-07	1.86952e-09	-1.12486e-10	-1.02733e-10	-2.26483e-10	8.69819e-10	3.0978e-07	3.50375e-09	1.24112e-10	1.81246e-09	-2.40973e-10	-2.46152e-10	-2.51321e-10	-2.26272e-10
147	1.54793e-07	1.89949e-09	-1.00943e-10	-1.33969e-10	-2.30725e-10	8.56511e-10	3.09966e-07	3.36344e-09	8.74608e-11	1.63574e-09	-2.36668e-10	-2.50019e-10	-2.39767e-10	-2.33618e-10
154	1.54893e-07	1.83229e-09	-1.31298e-10	-1.29307e-10	-2.24164e-10	8.84563e-10	3.10804e-07	3.22653e-09	1.02479e-10	1.52732e-09	-2.14508e-10	-2.272e-10	-2.39271e-10	-2.54737e-10
161	1.55044e-07	1.88984e-09	-1.33402e-10	-1.44276e-10	-2.37343e-10	8.37866e-10	3.10989e-07	3.07643e-09	7.08845e-11	1.42244e-09	-2.34122e-10	-2.52592e-10	-2.66707e-10	-2.25701e-10
168	1.55189e-07	1.86308e-09	-1.31498e-10	-1.33408e-10	-2.11682e-10	8.26058e-10	3.11985e-07	2.94944e-09	9.83685e-11	1.29933e-09	-2.41593e-10	-2.35512e-10	-2.41252e-10	-2.4114e-10
175	1.55249e-07	1.85191e-09	-1.55507e-10	-1.31745e-10	-2.41622e-10	7.94648e-10	3.11834e-07	2.80605e-09	8.78113e-11	1.20827e-09	-2.40876e-10	-2.43178e-10	-2.41201e-10	-2.5729e-10
182	1.55335e-07	1.83914e-09	-1.33228e-10	-1.4359e-10	-2.35545e-10	8.12145e-10	3.12262e-07	2.67017e-09	7.09282e-11	1.11332e-09	-2.30448e-10	-2.36062e-10	-2.54465e-10	-2.35654e-10
189	1.55457e-07	1.81848e-09	-1.46437e-10	-1.23994e-10	-2.41466e-10	7.90276e-10	3.12493e-07	2.58788e-09	8.38831e-11	1.00772e-09	-2.40434e-10	-2.47523e-10	-2.48155e-10	-2.58624e-10
196	1.55488e-07	1.81964e-09	-1.96096e-10	-1.28238e-10	-2.26491e-10	7.58589e-10	3.12679e-07	2.45689e-09	6.85513e-11	9.04307e-10	-2.47446e-10	-2.41659e-10	-2.43859e-10	-2.47196e-10
203	1.55068e-07	1.8472e-09	-1.84093e-10	-1.41358e-10	-2.01813e-10	7.35614e-10	3.11162e-07	2.35698e-09	5.57048e-11	8.38276e-10	-2.29174e-10	-2.43945e-10	-2.22899e-10	-2.4437e-10
210	1.54133e-07	1.79082e-09	-1.86147e-10	-1.45043e-10	-2.52202e-10	7.32049e-10	3.10046e-07	2.27103e-09	6.04059e-11	7.59245e-10	-2.39469e-10	-2.49727e-10	-2.5494e-10	-2.15342e-10
217	1.53839e-07	1.8404e-09	-1.89089e-10	-1.52224e-10	-2.18168e-10	7.42445e-10	3.1057e-07	2.17623e-09	4.32371e-11	6.65318e-10	-2.22144e-10	-2.42025e-10	-2.41833e-10	-2.43479e-10
224	1.53776e-07	1.83348e-09	-1.7978e-10	-1.58422e-10	-2.34976e-10	6.68931e-10	3.0955e-07	2.10133e-09	5.99147e-11	5.91938e-10	-2.4308e-10	-2.48578e-10	-2.21127e-10	-2.40597e-10
231	1.53753e-07	1.83382e-09	-1.96538e-10	-1.70809e-10	-2.32487e-10	6.46769e-10	3.10429e-07	2.00843e-09	3.02827e-11	5.68477e-10	-2.23851e-10	-2.48816e-10	-2.49097e-10	-2.45187e-10
238	1.53877e-07	1.82742e-09	-2.06284e-10	-1.7281e-10	-2.21741e-10	6.66868e-10	3.10055e-07	1.95664e-09	4.01968e-11	4.81542e-10	-2.40037e-10	-2.1426e-10	-2.3608e-10	-2.61913e-10
245	1.53857e-07	1.79131e-09	-2.17654e-10	-1.42226e-10	-2.40948e-10	6.32486e-10	3.10659e-07	1.8871e-09	5.80511e-11	4.16148e-10	-2.44316e-10	-2.32326e-10	-2.36051e-10	-2.49035e-10
252	1.5385e-07	1.80798e-09	-2.14155e-10	-1.56477e-10	-2.39533e-10	6.40638e-10	3.10646e-07	1.85747e-09	1.37594e-11	4.19694e-10	-2.45014e-10	-2.2546e-10	-2.37833e-10	-2.40242e-10
259	1.53855e-07	1.79351e-09	-1.98196e-10	-1.63584e-10	-2.28521e-10	6.20085e-10	3.10927e-07	1.78646e-09	3.65138e-11	3.49509e-10	-2.36806e-10	-2.40569e-10	-2.50765e-10	-2.15021e-10
266	1.53927e-07	1.80259e-09	-2.05999e-10	-1.52128e-10	-2.40945e-10	6.17754e-10	3.10945e-07	1.71662e-09	2.24671e-11	3.10363e-10	-2.44673e-10	-2.56159e-10	-2.42399e-10	-2.20014e-10
273	1.53962e-07	1.81237e-09	-2.2404e-10	-1.6471e-10	-2.37852e-10	5.65204e-10	3.11025e-07	1.71046e-09	6.51355e-12	3.26271e-10	-2.51399e-10	-2.18711e-10	-2.3252e-10	-2.37533e-10
280	1.53996e-07	1.77949e-09	-2.00065e-10	-1.60576e-10	-2.31064e-10	5.72008e-10	3.1142e-07	1.66856e-09	4.54682e-12	2.44424e-10	-2.55128e-10	-2.44488e-10	-2.47738e-10	-2.36382e-10
287	1.5403e-07	1.81021e-09	-2.14753e-10	-1.65077e-10	-2.30985e-10	5.86173e-10	3.10658e-07	1.6623e-09	1.07885e-12	2.61813e-10	-2.38433e-10	-2.54878e-10	-2.47181e-10	-2.34464e-10
294	1.53995e-07	1.76862e-09	-2.03591e-10	-1.53659e-10	-2.24013e-10	5.81068e-10	3.11885e-07	1.58662e-09	-1.27531e-12	1.62737e-10	-2.41338e-10	-2.41414e-10	-2.50352e-10	-2.50407e-10
301	1.54043e-07	1.79438e-09	-2.12269e-10	-1.69793e-10	-2.41693e-10	5.67977e-10	3.11219e-07	1.5196e-09	-1.61641e-11	1.76175e-10	-2.5022e-10	-2.55523e-10	-2.5303e-10	-2.47155e-10
308	1.54093e-07	1.76084e-09	-2.11935e-10	-1.68064e-10	-2.22951e-10	5.44676e-10	3.11577e-07	1.5501e-09	6.50164e-12	1.44339e-10	-2.28704e-10	-2.40183e-10	-2.49244e-10	-2.38746e-10
315	1.54053e-07	1.76731e-09	-2.17107e-10	-1.82128e-10	-2.34051e-10	5.56019e-10	3.11793e-07	1.49247e-09	-5.048e-12	1.04792e-10	-2.4534e-10	-2.37349e-10	-2.48446e-10	-2.36158e-10
322	1.54047e-07	1.75316e-09	-2.26828e-10	-1.64921e-10	-2.26475e-10	5.54385e-10	3.11553e-07	1.44133e-09	-9.59087e-12	1.2179e-10	-2.50927e-10	-2.45849e-10	-2.33671e-10	-2.31284e-10
329	1.5406e-07	1.78864e-09	-2.18035e-10	-1.74338e-10	-2.33924e-10	5.22461e-10	3.121e-07	1.41718e-09	-3.88129e-14	8.98598e-11	-2.4331e-10	-2.35044e-10	-2.52979e-10	-2.49409e-10
336	1.54044e-07	1.75706e-09	-2.30763e-10	-1.74783e-10	-2.36041e-10	4.94267e-10	3.11414e-07	1.38328e-09	3.49202e-11	6.88027e-11	-2.30922e-10	-2.35367e-10	-2.3102e-10	-2.45383e-10
343	1.54033e-07	1.72642e-09	-2.37858e-10	-1.84226e-10	-2.35689e-10	5.39247e-10	3.11767e-07	1.38958e-09	2.43187e-11	4.06871e-11	-2.45009e-10	-2.40479e-10	-2.2943e-10	-2.26341e-10
350	1.54052e-07	1.74877e-09	-2.06922e-10	-1.56886e-10	-2.48823e-10	5.0072e-10	3.12013e-07	1.36302e-09	-2.05178e-11	5.01263e-11	-2.51212e-10	-2.42333e-10	-2.39987e-10	-2.4917e-10
357	1.54069e-07	1.74873e-09	-2.50113e-10	-1.71425e-10	-2.30393e-10	4.76885e-10	3.11342e-07	1.35219e-09	7.67945e-12	3.79587e-11	-2.48091e-10	-2.32516e-10	-2.39927e-10	-2.61433e-10
364	1.54076e-07	1.71878e-09	-2.32324e-10	-1.86591e-10	-2.38284e-10	4.7232e-10	3.11839e-07	1.35566e-09	1.50295e-12	4.92247e-11	-2.41897e-10	-2.15963e-10	-2.30899e-10	-2.52462e-10
371	1.54094e-07	1.74144e-09	-2.07942e-10	-1.6696e-10	-2.45901e-10	4.76193e-10	3.12072e-07	1.31178e-09	-1.38312e-11	1.12065e-11	-2.39536e-10	-2.45514e-10	-2.5171e-10	-2.30304e-10
378	1.54074e-07	1.72182e-09	-2.16622e-10	-1.8769e-10	-2.40636e-10	4.91089e-10	3.11806e-07	1.297e-09	-3.00884e-11	-7.98897e-12	-2.19856e-10	-2.4782e-10	-2.33551e-10	-2.27349e-10
385	1.54067e-07	1.75576e-09	-2.35814e-10	-1.89161e-10	-2.34195e-10	4.95155e-10	3.12287e-07	1.27755e-09	-2.36298e-13	-3.41464e-11	-2.47134e-10	-2.46717e-10	-2.51067e-10	-2.57312e-10
392	1.54067e-07	1.73351e-09	-2.48789e-10	-1.74342e-10	-2.33259e-10	4.45287e-10	3.1188e-07	1.25091e-09	-5.37957e-12	-2.74357e-11	-2.46178e-10	-2.29104e-10	-2.35283e-10	-2.40885e-10
399	1.54068e-07	1.72849e-09	-2.39308e-10	-1.72905e-10	-2.32738e-10	4.73099e-10	3.11808e-07	1.27861e-09	-2.69016e-11	-5.09616e-11	-2.33277e-10	-2.48593e-10	-2.33091e-10	-2.52161e-10
406	1.54072e-07	1.73717e-09	-2.28358e-10	-1.55169e-10	-2.48175e-10	4.53229e-10	3.12045e-07	1.25021e-09	1.44696e-11	-6.03248e-11	-2.46245e-10	-2.45662e-10	-2.4107e-10	-2.49542e-10
413	1.54097e-07	1.73441e-09	-2.31146e-10	-1.54933e-10	-2.53281e-10	4.4921e-10	3.11696e-07	1.23016e-09	-1.59122e-11	-6.43322e-11	-2.48468e-10	-2.23067e-10	-2.30879e-10	-2.3105e-10
420	1.54059e-07	1.73102e-09	-2.408e-10	-1.44955e-10	-2.28009e-10	4.25649e-10	3.12343e-07	1.23639e-09	4.77821e-12	-7.69038e-11	-2.50657e-10	-2.31605e-10	-2.44691e-10	-2.32888e-10
427	1.541e-07	1.7198e-09	-2.54383e-10	-1.47053e-10	-2.39786e-10	4.61617e-10	3.12254e-07	1.22703e-09	-4.17954e-12	-9.57402e-11	-2.57834e-10	-2.51698e-10	-2.4554e-10	-2.36302e-10
434	1.5404e-07	1.74848e-09	-2.23355e-10	-1.85433e-10	-2.39543e-10	4.03142e-10	3.11702e-07	1.17266e-09	-2.82329e-12	-5.90218e-11	-2.28778e-10	-2.58051e-10	-2.48043e-10	-2.32791e-10
441	1.5407e-07	1.70825e-09	-2.42897e-10	-1.85274e-10	-2.45504e-10	4.49466e-10	3.11573e-07	1.18254e-09	1.85676e-11	-9.79555e-11	-2.44315e-10	-2.5272e-10	-2.38243e-10	-2.44214e-10
448	1.54072e-07	1.74009e-09	-2.40286e-10	-1.76968e-10	-2.39687e-10	4.31347e-10	3.12325e-07	1.19069e-09	9.21238e-12	-9.65884e-11	-2.38496e-10	-2.53344e-10	-2.36797e-10	-2.36488e-10
455	1.54078e-07	1.69497e-09	-2.38719e-10	-1.8209e-10	-2.49194e-10	4.2579e-10	3.11977e-07	1.15752e-09	-7.09331e-12	-1.07634e-10	-2.37894e-10	-2.5593e-10	-2.41566e-10	-2.55766e-10
462	1.54093e-07	1.70767e-09	-2.28018e-10	-1.59492e-10	-2.39641e-10	4.31114e-10	3.12133e-07	1.17478e-09	-1.11168e-11	-9.62666e-11	-2.47194e-10	-2.44466e-10	-2.44909e-10	-2.5299e-10
469	1.5408e-07	1.72582e-09	-2.22007e-10	-1.87664e-10	-2.21271e-10	4.27169e-10	3.12238e-07	1.15481e-09	4.26438e-12	-9.72355e-11	-2.51636e-10	-2.27289e-10	-2.56232e-10	-2.38241e-10
476	1.54079e-07	1.73696e-09	-2.36315e-10	-1.51101e-10	-2.28556e-10	4.30925e-10	3.11968e-07	1.1568e-09	-1.58009e-11	-9.54087e-11	-2.33633e-10	-2.43674e-10	-2.48733e-10	-2.26564e-10
483	1.54095e-07	1.72511e-09	-2.39138e-10	-1.76919e-10	-2.46726e-10	3.98147e-10	3.11755e-07	1.13893e-09	-1.967e-11	-1.29082e-10	-2.1437e-10	-2.44394e-10	-2.54616e-10	-2.57002e-10
490	1.54128e-07	1.68648e-09	-2.26836e-10	-1.73737e-10	-2.33454e-10	4.03918e-10	3.12293e-07	1.17612e-09	-2.55718e-11	-1.24887e-10	-2.23077e-10	-2.42938e-10	-2.58974e-10	-2.46209e-10
497	1.54093e-07	1.7089e-09	-2.20976e-10	-1.67916e-10	-2.42102e-10	3.95515e-10	3.1215e-07	1.13879e-09	1.69972e-11	-1.29183e-10	-2.43082e-10	-2.33329e-10	-2.57579e-10	-2.41903e-10
504	1.54075e-07	1.69641e-09	-2.51077e-10	-1.83928e-10	-2.35536e-10	4.17746e-10	3.11819e-07	1.11768e-09	-6.00189e-12	-8.53442e-11	-2.31116e-10	-2.53782e-10	-2.35415e-10	-2.33883e-10
511	1.54029e-07	1.73471e-09	-2.27635e-10	-1.48048e-10	-2.39119e-10	4.08277e-10	3.12047e-07	1.11424e-09	-9.84684e-12	-1.21584e-10	-2.32804e-10	-2.49401e-10	-2.39565e-10	-2.30316e-10
518	1.54031e-07	1.73385e-09	-2.39265e-10	-1.77901e-10	-2.17973e-10	4.00894e-10	3.12302e-07	1.12458e-09	-2.02029e-11	-1.33348e-10	-2.29352e-10	-2.54944e-10	-2.50466e-10	-2.67806e-10
525	1.54066e-07	1.69747e-09	-2.30247e-10	-1.83448e-10	-2.35928e-10	4.12282e-10	3.12205e-07	1.12689e-09	-2.75404e-11	-1.24295e-10	-2.4715e-10	-2.45213e-10	-2.38749e-10	-2.47212e-10
532	1.54061e-07	1.66936e-09	-2.30032e-10	-1.79992e-10	-2.51379e-10	3.89799e-10	3.11832e-07	1.1442e-09	-2.64752e-11	-1.30925e-10	-2.27177e-10	-2.27755e-10	-2.4094e-10	-2.38093e-10
539	1.54106e-07	1.71034e-09	-2.29483e-10	-2.01638e-10	-2.31178e-10	3.74987e-10	3.12232e-07	1.12961e-09	-1.36748e-13	-1.27129e-10	-2.36251e-10	-2.53403e-10	-2.61466e-10	-2.32435e-10
546	1.54079e-07	1.68775e-09	-2.43985e-10	-1.71808e-10	-2.30288e-10	3.92489e-10	3.1211e-07	1.10076e-09	-1.9389e-11	-1.23803e-10	-2.50507e-10	-2.48644e-10	-2.54733e-10	-2.36096e-10
553	1.54111e-07	1.66132e-09	-2.37253e-10	-1.71032e-10	-2.50163e-10	3.91819e-10	3.1204e-07	1.08394e-09	-3.02685e-11	-1.31155e-10	-2.45783e-10	-2.46779e-10	-2.60351e-10	-2.29537e-10
560	1.54107e-07	1.73867e-09	-2.44398e-10	-1.63229e-10	-2.56879e-10	3.68691e-10	3.12212e-07	1.11027e-09	-2.54954e-11	-1.52348e-10	-2.48015e-10	-2.51304e-10	-2.52152e-10	-2.35245e-10
567	1.54067e-07	1.73286e-09	-2.09121e-10	-1.94779e-10	-2.31362e-10	3.70042e-10	3.12082e-07	1.09864e-09	-2.13367e-11	-1.19793e-10	-2.38435e-10	-2.45886e-10	-2.46476e-10	-2.37929e-10
574	1.54056e-07	1.68922e-09	-2.40799e-10	-1.84155e-10	-2.13054e-10	3.69203e-10	3.12047e-07	1.10582e-09	-8.69898e-12	-1.26892e-10	-2.51735e-10	-2.37491e-10	-2.62742e-10	-2.61381e-10
581	1.54045e-07	1.68808e-09	-2.40488e-10	-1.82681e-10	-2.46634e-10	3.92632e-10	3.12194e-07	1.11452e-09	-1.55318e-11	-1.48446e-10	-2.45608e-10	-2.53926e-10	-2.34458e-10	-2.46736e-10
588	1.54096e-07	1.70142e-09	-2.40984e-10	-1.80267e-10	-2.34756e-10	3.44601e-10	3.12394e-07	1.05908e-09	-2.83375e-11	-1.7132e-10	-2.50827e-10	-2.56956e-10	-2.4273e-10	-2.51946e-10
595	1.54148e-07	1.69173e-09	-2.53034e-10	-1.78149e-10	-2.38593e-10	3.87877e-10	3.11922e-07	1.07718e-09	5.1084e-12	-1.70632e-10	-2.55914e-10	-2.51008e-10	-2.55577e-10	-2.34578e-10
602	1.54142e-07	1.70759e-09	-2.37968e-10	-1.79215e-10	-2.28927e-10	3.63839e-10	3.12085e-07	1.0654e-09	-4.61922e-11	-1.42313e-10	-2.24031e-10	-2.39924e-10	-2.41454e-10	-2.46825e-10
609	1.54118e-07	1.71476e-09	-2.47301e-10	-1.74336e-10	-2.30808e-10	3.55572e-10	3.12377e-07	1.0873e-09	-1.05154e-11	-1.46686e-10	-2.34811e-10	-2.29695e-10	-2.59145e-10	-2.18698e-10
616	1.54138e-07	1.69713e-09	-2.39416e-10	-1.8627e-10	-2.45299e-10	3.71249e-10	3.12449e-07	1.12738e-09	-3.03644e-11	-1.57116e-10	-2.41475e-10	-2.61481e-10	-2.43034e-10	-2.27253e-10
623	1.54121e-07	1.70177e-09	-1.98343e-10	-1.79161e-10	-2.35644e-10	3.32824e-10	3.12026e-07	1.09239e-09	1.39611e-12	-1.52495e-10	-2.63252e-10	-2.58915e-10	-2.43868e-10	-2.49008e-10
630	1.54104e-07	1.69003e-09	-2.1358e-10	-1.75353e-10	-2.34619e-10	3.61604e-10	3.12801e-07	1.0797e-09	-3.37099e-11	-1.53688e-10	-2.45754e-10	-2.30711e-10	-2.48451e-10	-2.47886e-10
637	1.54126e-07	1.70611e-09	-2.33227e-10	-1.82067e-10	-2.41634e-10	3.68445e-10	3.12201e-07	1.09494e-09	-1.5122e-11	-1.45048e-10	-2.59873e-10	-2.36086e-10	-2.43596e-10	-2.36277e-10
644	1.54183e-07	1.70617e-09	-2.52192e-10	-1.65776e-10	-2.22764e-10	3.75676e-10	3.12111e-07	1.09402e-09	-3.82294e-11	-1.52976e-10	-2.41052e-10	-2.3684e-10	-2.57939e-10	-2.53239e-10
651	1.54185e-07	1.67468e-09	-2.45507e-10	-1.95456e-10	-2.42628e-10	3.37207e-10	3.12362e-07	1.07539e-09	2.2311e-13	-1.56903e-10	-2.30427e-10	-2.53661e-10	-2.16917e-10	-2.28161e-10
658	1.54243e-07	1.68611e-09	-2.42107e-10	-1.77369e-10	-2.35866e-10	3.5901e-10	3.12566e-07	1.0841e-09	-2.86899e-11	-1.3439e-10	-2.40118e-10	-2.44162e-10	-2.4986e-10	-2.53846e-10
665	1.54247e-07	1.68096e-09	-2.35003e-10	-1.80607e-10	-2.37568e-10	3.51581e-10	3.12464e-07	1.06561e-09	-3.2647e-11	-1.61782e-10	-2.39597e-10	-2.37533e-10	-2.61837e-10	-2.46209e-10
672	1.54232e-07	1.68176e-09	-2.37763e-10	-1.92554e-10	-2.27544e-10	3.45195e-10	3.12107e-07	1.10175e-09	-1.25927e-11	-1.63648e-10	-2.25195e-10	-2.35086e-10	-2.69955e-10	-2.46512e-10
679	1.54213e-07	1.6706e-09	-2.49999e-10	-1.85593e-10	-2.43715e-10	3.37016e-10	3.12712e-07	1.07399e-09	-5.64833e-12	-1.81142e-10	-2.50129e-10	-2.44755e-10	-2.36222e-10	-2.48967e-10
686	1.54163e-07	1.66294e-09	-2.43735e-10	-1.8738e-10	-2.37611e-10	3.54992e-10	3.12305e-07	1.05247e-09	-1.72871e-12	-1.59905e-10	-2.38986e-10	-2.4121e-10	-2.30082e-10	-2.38392e-10
693	1.54178e-07	1.66002e-09	-2.3613e-10	-1.87551e-10	-2.48197e-10	3.57359e-10	3.12134e-07	1.07464e-09	-3.53391e-11	-1.59547e-10	-2.33806e-10	-2.48489e-10	-2.46308e-10	-2.58706e-10
700	1.54258e-07	1.68159e-09	-2.42792e-10	-1.95193e-10	-2.34514e-10	3.52795e-10	3.13127e-07	1.08118e-09	-3.29403e-11	-1.55424e-10	-2.51004e-10	-2.48298e-10	-2.355e-10	-2.60389e-10
707	1.54292e-07	1.70047e-09	-2.44423e-10	-1.71267e-10	-2.39989e-10	3.47931e-10	3.12216e-07	1.07175e-09	-8.30333e-12	-1.6295e-10	-2.51642e-10	-2.57777e-10	-2.24717e-10	-2.34819e-10
714	1.54263e-07	1.68444e-09	-2.33033e-10	-1.84696e-10	-2.34385e-10	3.35053e-10	3.12551e-07	1.09049e-09	-1.47207e-11	-1.21867e-10	-2.39284e-10	-2.58289e-10	-2.68127e-10	-2.04215e-10
721	1.5428e-07	1.65072e-09	-2.42302e-10	-1.82543e-10	-2.07387e-10	3.44458e-10	3.12986e-07	1.07148e-09	-1.39938e-11	-1.59261e-10	-2.38999e-10	-2.36704e-10	-2.40506e-10	-2.52442e-10
728	1.54295e-07	1.6663e-09	-2.50704e-10	-1.68872e-10	-2.08367e-10	3.24974e-10	3.12711e-07	1.07719e-09	-3.78755e-11	-1.62706e-10	-2.53221e-10	-2.46257e-10	-2.62427e-10	-2.4426e-10
735	1.54306e-07	1.65e-09	-2.05063e-10	-1.56104e-10	-2.33692e-10	3.11131e-10	3.12918e-07	1.08063e-09	-2.59824e-11	-1.62625e-10	-2.51574e-10	-2.46816e-10	-2.55864e-10	-2.56582e-10
742	1.54351e-07	1.65782e-09	-2.49764e-10	-1.83145e-10	-2.43974e-10	3.44092e-10	3.13007e-07	1.09072e-09	5.28839e-12	-1.41562e-10	-2.55636e-10	-2.58728e-10	-2.44178e-10	-2.60241e-10
749	1.54349e-07	1.66527e-09	-2.47778e-10	-1.82579e-10	-2.39273e-10	3.20858e-10	3.12504e-07	1.0674e-09	-2.49595e-11	-1.75017e-10	-2.39074e-10	-2.46365e-10	-2.43334e-10	-2.43081e-10
756	1.54334e-07	1.65708e-09	-2.42075e-10	-1.93951e-10	-2.36796e-10	3.15336e-10	3.12853e-07	1.0734e-09	-5.91149e-12	-1.718e-10	-2.53512e-10	-2.39132e-10	-2.60696e-10	-2.47477e-10
763	1.5436e-07	1.62581e-09	-2.3642e-10	-1.67693e-10	-2.27995e-10	3.15118e-10	3.12898e-07	1.03663e-09	-2.47905e-11	-1.49295e-10	-2.39422e-10	-2.59801e-10	-2.32765e-10	-2.3139e-10
770	1.54355e-07	1.64502e-09	-2.29882e-10	-1.78341e-10	-2.34152e-10	3.14619e-10	3.13064e-07	1.07868e-09	-1.93162e-11	-1.66847e-10	-2.49244e-10	-2.51948e-10	-2.3392e-10	-2.29103e-10
777	1.54386e-07	1.71081e-09	-2.57196e-10	-1.90523e-10	-2.45334e-10	3.25319e-10	3.13298e-07	1.06517e-09	-2.26636e-11	-1.61006e-10	-2.42525e-10	-2.3568e-10	-2.47268e-10	-2.39092e-10
784	1.54381e-07	1.70505e-09	-2.58451e-10	-1.71544e-10	-2.47502e-10	3.05848e-10	3.12558e-07	1.05712e-09	-7.83813e-12	-1.82515e-10	-2.38557e-10	-2.37409e-10	-2.34337e-10	-2.42992e-10
791	1.54396e-07	1.68138e-09	-2.47535e-10	-1.5689e-10	-2.42561e-10	3.08798e-10	3.1285e-07	1.05825e-09	-1.274e-11	-1.66534e-10	-2.50038e-10	-2.42626e-10	-2.48054e-10	-2.39998e-10
798	1.54377e-07	1.66002e-09	-2.40984e-10	-2.01625e-10	-2.45441e-10	3.22128e-10	3.13321e-07	1.03291e-09	-9.4854e-12	-1.56058e-10	-2.43289e-10	-2.35188e-10	-2.37572e-10	-2.50805e-10
805	1.54428e-07	1.64974e-09	-2.46674e-10	-1.583e-10	-2.38841e-10	3.10494e-10	3.12588e-07	1.04391e-09	-2.27042e-11	-1.52252e-10	-2.43453e-10	-2.54804e-10	-2.57687e-10	-2.41724e-10
812	1.54383e-07	1.68481e-09	-2.46477e-10	-1.8037e-10	-2.50403e-10	3.39515e-10	3.13288e-07	1.06548e-09	-2.2334e-11	-1.62527e-10	-2.36903e-10	-2.36673e-10	-2.32978e-10	-2.60668e-10
819	1.54321e-07	1.677e-09	-2.38067e-10	-1.9215e-10	-2.35873e-10	3.25739e-10	3.12831e-07	1.07647e-09	1.58728e-11	-1.69383e-10	-2.46796e-10	-2.60468e-10	-2.63634e-10	-2.48204e-10
826	1.54305e-07	1.68478e-09	-2.49807e-10	-1.95353e-10	-2.39537e-10	3.0522e-10	3.12661e-07	1.05808e-09	-4.06729e-11	-1.68627e-10	-2.46009e-10	-2.37505e-10	-2.46548e-10	-2.52561e-10
833	1.54346e-07	1.67488e-09	-2.41106e-10	-1.94017e-10	-2.22622e-10	3.23415e-10	3.13232e-07	1.04926e-09	-3.09292e-11	-1.5418e-10	-2.43168e-10	-2.49301e-10	-2.64064e-10	-2.54409e-10
840	1.54413e-07	1.68871e-09	-2.27862e-10	-1.85022e-10	-2.5972e-10	3.27096e-10	3.13024e-07	1.02343e-09	-4.99673e-12	-1.70729e-10	-2.62636e-10	-2.58173e-10	-2.36299e-10	-2.48792e-10
847	1.5436e-07	1.70738e-09	-2.34898e-10	-1.95616e-10	-2.33435e-10	3.07514e-10	3.12297e-07	1.05615e-09	-2.95034e-11	-1.60612e-10	-2.46808e-10	-2.52536e-10	-2.42483e-10	-2.41195e-10
854	1.54378e-07	1.70396e-09	-2.43806e-10	-1.88446e-10	-2.165e-10	3.27188e-10	3.12795e-07	1.0303e-09	-8.42155e-13	-1.76137e-10	-2.51309e-10	-2.54933e-10	-2.34405e-10	-2.5113e-10
861	1.54357e-07	1.69605e-09	-2.25702e-10	-1.7333e-10	-2.43709e-10	3.19428e-10	3.12712e-07	1.04704e-09	-2.01698e-11	-1.60941e-10	-2.59207e-10	-2.5139e-10	-2.55559e-10	-2.43097e-10
868	1.54358e-07	1.67614e-09	-2.37695e-10	-1.84781e-10	-2.42472e-10	3.60655e-10	3.12707e-07	1.06226e-09	-2.19652e-11	-1.62869e-10	-2.60132e-10	-2.48326e-10	-2.43721e-10	-2.43582e-10
875	1.54338e-07	1.6592e-09	-2.38513e-10	-1.66653e-10	-2.44464e-10	3.06266e-10	3.13072e-07	1.02886e-09	-3.02808e-11	-1.75162e-10	-2.56008e-10	-2.37878e-10	-2.51813e-10	-2.30457e-10
882	1.5428e-07	1.69928e-09	-2.31999e-10	-1.74125e-10	-2.31673e-10	3.43202e-10	3.12525e-07	1.03804e-09	-2.40578e-11	-1.70001e-10	-2.52679e-10	-2.29414e-10	-2.56674e-10	-2.3709e-10
889	1.54357e-07	1.66646e-09	-2.43858e-10	-1.59556e-10	-2.33716e-10	3.09361e-10	3.12846e-07	1.06071e-09	-1.23771e-11	-1.67552e-10	-2.36171e-10	-2.36231e-10	-2.36475e-10	-2.39836e-10
896	1.54382e-07	1.66196e-09	-2.43246e-10	-1.83609e-10	-2.45127e-10	3.17642e-10	3.12757e-07	1.07473e-09	-3.52293e-11	-1.70304e-10	-2.53778e-10	-2.56333e-10	-2.5739e-10	-2.4872e-10
903	1.5434e-07	1.70285e-09	-2.42155e-10	-1.67106e-10	-2.21559e-10	2.68871e-10	3.12363e-07	1.01607e-09	-1.44013e-11	-1.6116e-10	-2.40377e-10	-2.48515e-10	-2.54164e-10	-2.36355e-10
910	1.54339e-07	1.68292e-09	-2.4104e-10	-1.85259e-10	-2.40854e-10	3.42442e-10	3.12926e-07	1.02111e-09	-3.00434e-11	-1.76377e-10	-2.51519e-10	-2.36973e-10	-2.52574e-10	-2.25035e-10
917	1.54331e-07	1.6692e-09	-2.23519e-10	-1.78326e-10	-2.41162e-10	3.15305e-10	3.13177e-07	1.06964e-09	-1.34983e-11	-1.74264e-10	-2.38483e-10	-2.52893e-10	-2.44593e-10	-2.53739e-10
924	1.54402e-07	1.69457e-09	-2.3976e-10	-1.80272e-10	-2.50299e-10	2.97784e-10	3.12399e-07	1.05807e-09	-2.29679e-11	-1.64748e-10	-2.45211e-10	-2.40482e-10	-2.60087e-10	-2.53647e-10
931	1.54387e-07	1.70459e-09	-2.37439e-10	-1.83332e-10	-2.22574e-10	3.23661e-10	3.12882e-07	1.1024e-09	-3.16219e-11	-1.67642e-10	-2.56309e-10	-2.50763e-10	-2.35269e-10	-2.56416e-10
938	1.54299e-07	1.71012e-09	-2.41481e-10	-1.75174e-10	-1.99843e-10	3.28467e-10	3.12981e-07	1.03753e-09	-1.93012e-11	-1.87397e-10	-2.5398e-10	-2.62249e-10	-2.63889e-10	-2.49616e-10
945	1.54374e-07	1.66466e-09	-2.29359e-10	-1.80146e-10	-2.56424e-10	3.32183e-10	3.12611e-07	1.06537e-09	7.59927e-12	-1.65958e-10	-2.44283e-10	-2.39875e-10	-2.4902e-10	-2.39749e-10
952	1.54375e-07	1.68122e-09	-2.33865e-10	-1.66339e-10	-2.3339e-10	3.18151e-10	3.13073e-07	1.00329e-09	-1.72407e-11	-1.75672e-10	-2.51137e-10	-2.49244e-10	-2.45238e-10	-2.55752e-10
959	1.54385e-07	1.68227e-09	-2.42093e-10	-1.86024e-10	-2.37156e-10	2.90132e-10	3.13172e-07	1.07638e-09	-3.41944e-11	-1.67412e-10	-2.69221e-10	-2.61168e-10	-2.46466e-10	-2.14339e-10
966	1.54388e-07	1.6608e-09	-2.3194e-10	-1.78779e-10	-2.49972e-10	3.24803e-10	3.12665e-07	1.00802e-09	-6.81395e-13	-1.73415e-10	-2.44189e-10	-2.49561e-10	-2.38284e-10	-2.536e-10
973	1.5436e-07	1.66455e-09	-2.46693e-10	-1.90755e-10	-2.57309e-10	3.13537e-10	3.1315e-07	1.00898e-09	6.34303e-12	-1.66352e-10	-2.37829e-10	-2.47815e-10	-2.50184e-10	-2.38258e-10
980	1.54331e-07	1.66096e-09	-2.34868e-10	-1.68287e-10	-2.35674e-10	3.00558e-10	3.12645e-07	1.05399e-09	-1.3305e-11	-1.85755e-10	-2.52637e-10	-2.34386e-10	-2.5076e-10	-2.47244e-10
987	1.54361e-07	1.68731e-09	-2.51571e-10	-2.00916e-10	-2.42238e-10	3.14437e-10	3.12646e-07	1.0277e-09	-3.46203e-12	-1.67868e-10	-2.41459e-10	-2.36171e-10	-2.41613e-10	-2.45457e-10
994	1.54378e-07	1.67329e-09	-2.26611e-10	-1.76547e-10	-2.50762e-10	3.04386e-10	3.13121e-07	1.03099e-09	-1.90461e-11	-1.73928e-10	-2.54824e-10	-2.42264e-10	-2.4235e-10	-2.3593e-10
1001	1.54374e-07	1.64082e-09	-2.53664e-10	-1.74474e-10	-2.29681e-10	3.1868e-10	3.12507e-07	1.03924e-09	-1.92061e-11	-1.75114e-10	-2.58346e-10	-2.45725e-10	-2.35749e-10	-2.50612e-10
1008	1.54433e-07	1.67005e-09	-2.56806e-10	-1.7177e-10	-2.46173e-10	2.94027e-10	3.12517e-07	1.02868e-09	-1.9641e-11	-1.62552e-10	-2.50951e-10	-2.33537e-10	-2.47966e-10	-2.65074e-10
1015	1.54429e-07	1.68577e-09	-2.51436e-10	-1.73783e-10	-2.43473e-10	2.9557e-10	3.13232e-07	1.04845e-09	2.18847e-12	-1.65584e-10	-2.52757e-10	-2.53845e-10	-2.67739e-10	-2.4721e-10
1022	1.54473e-07	1.65066e-09	-2.51697e-10	-1.81653e-10	-2.50068e-10	3.17424e-10	3.12765e-07	1.09063e-09	-2.16973e-11	-1.6529e-10	-2.44556e-10	-2.25386e-10	-2.45814e-10	-2.49788e-10
1029	1.54388e-07	1.69737e-09	-2.45616e-10	-1.60312e-10	-2.42964e-10	2.92256e-10	3.13144e-07	1.05573e-09	-2.72175e-11	-1.74666e-10	-2.45606e-10	-2.45789e-10	-2.40397e-10	-2.34954e-10
1036	1.54375e-07	1.66056e-09	-2.53019e-10	-1.80364e-10	-2.46287e-10	3.13138e-10	3.12292e-07	1.04979e-09	-4.07479e-11	-1.70506e-10	-2.49797e-10	-2.53652e-10	-2.59598e-10	-2.52194e-10
1043	1.54361e-07	1.66512e-09	-2.49635e-10	-1.74791e-10	-2.29943e-10	3.21574e-10	3.13052e-07	1.01754e-09	-5.05918e-11	-1.75436e-10	-2.31092e-10	-2.40816e-10	-2.55197e-10	-2.48724e-10
1050	1.54389e-07	1.65586e-09	-2.56096e-10	-1.97567e-10	-2.40601e-10	3.30721e-10	3.12817e-07	1.02601e-09	-2.08616e-11	-1.734e-10	-2.44027e-10	-2.48517e-10	-2.49106e-10	-2.51473e-10
1057	1.54382e-07	1.67042e-09	-2.43578e-10	-2.10409e-10	-2.45163e-10	3.20528e-10	3.12597e-07	9.98881e-10	-1.54544e-11	-1.85622e-10	-2.50097e-10	-2.32269e-10	-2.4132e-10	-2.3269e-10
1064	1.54404e-07	1.68719e-09	-2.44554e-10	-1.9877e-10	-2.22526e-10	2.99461e-10	3.13236e-07	1.0447e-09	-1.08403e-11	-1.79688e-10	-2.37444e-10	-2.44117e-10	-2.53911e-10	-2.2185e-10
1071	1.54421e-07	1.66383e-09	-2.33043e-10	-1.71986e-10	-2.40955e-10	3.2468e-10	3.12587e-07	1.02881e-09	-1.61398e-11	-1.64651e-10	-2.47163e-10	-2.28334e-10	-2.56272e-10	-2.33503e-10
1078	1.5438e-07	1.65735e-09	-2.40923e-10	-1.82107e-10	-2.52759e-10	3.40635e-10	3.12541e-07	1.04947e-09	-8.36379e-12	-1.7765e-10	-2.47779e-10	-2.56563e-10	-2.31291e-10	-2.25648e-10
1085	1.54374e-07	1.68896e-09	-2.4602e-10	-1.62442e-10	-2.29013e-10	3.09784e-10	3.13505e-07	1.06686e-09	-1.78011e-11	-1.61939e-10	-2.56168e-10	-2.52096e-10	-2.54949e-10	-2.47424e-10
1092	1.54405e-07	1.67926e-09	-2.33425e-10	-2.00103e-10	-2.50048e-10	3.00487e-10	3.12552e-07	1.04476e-09	-2.87719e-11	-1.55266e-10	-2.20516e-10	-2.69076e-10	-2.2809e-10	-2.52754e-10
1099	1.54339e-07	1.62342e-09	-2.45422e-10	-1.59918e-10	-2.42517e-10	2.98821e-10	3.1275e-07	9.97529e-10	-3.21021e-11	-1.66028e-10	-2.35606e-10	-2.57444e-10	-2.38403e-10	-2.34359e-10
1106	1.54361e-07	1.68891e-09	-2.45965e-10	-2.02055e-10	-2.41008e-10	2.90465e-10	3.12944e-07	1.05913e-09	-2.89717e-11	-1.64993e-10	-2.67789e-10	-2.43266e-10	-2.45334e-10	-2.49348e-10
1113	1.54359e-07	1.6728e-09	-2.50809e-10	-1.60863e-10	-2.44259e-10	2.96935e-10	3.12551e-07	1.05596e-09	-9.00075e-12	-1.79386e-10	-2.40229e-10	-2.45741e-10	-2.353e-10	-2.34884e-10
1120	1.54303e-07	1.69628e-09	-2.4379e-10	-1.74193e-10	-2.38023e-10	2.85513e-10	3.12867e-07	1.01402e-09	-1.14713e-11	-1.64472e-10	-2.54774e-10	-2.4673e-10	-2.28542e-10	-2.49173e-10
1127	1.54316e-07	1.7146e-09	-2.31953e-10	-1.88593e-10	-2.43394e-10	3.01325e-10	3.12856e-07	1.03605e-09	-2.39886e-11	-1.60383e-10	-2.43849e-10	-2.38695e-10	-2.43525e-10	-2.52293e-10
1134	1.54316e-07	1.70465e-09	-2.3932e-10	-1.80653e-10	-2.46073e-10	2.8787e-10	3.12776e-07	1.04007e-09	-1.92816e-11	-1.83275e-10	-2.52809e-10	-2.43139e-10	-2.22787e-10	-2.58995e-10
1141	1.54337e-07	1.67075e-09	-2.34019e-10	-1.76963e-10	-2.20178e-10	3.01514e-10	3.12701e-07	1.05236e-09	-3.53244e-12	-1.62791e-10	-2.43682e-10	-2.36535e-10	-2.50388e-10	-2.5102e-10
1148	1.54309e-07	1.64388e-09	-2.33131e-10	-1.96806e-10	-2.35855e-10	3.14418e-10	3.12081e-07	1.04303e-09	-1.59334e-11	-1.74971e-10	-2.50145e-10	-2.40657e-10	-2.62544e-10	-2.59824e-10
1155	1.5427e-07	1.63819e-09	-2.47298e-10	-1.87344e-10	-2.38263e-10	3.10363e-10	3.1262e-07	1.04388e-09	-1.49354e-11	-1.80866e-10	-2.40521e-10	-2.35829e-10	-2.48267e-10	-2.37769e-10
1162	1.5424e-07	1.68152e-09	-2.41759e-10	-1.78697e-10	-2.40235e-10	2.92766e-10	3.12792e-07	1.03912e-09	8.8743e-13	-1.8799e-10	-2.32056e-10	-2.43492e-10	-2.486e-10	-2.40117e-10
1169	1.54274e-07	1.65243e-09	-2.49544e-10	-1.83336e-10	-2.49371e-10	3.21194e-10	3.12423e-07	1.02568e-09	-2.70562e-11	-1.76808e-10	-2.39585e-10	-2.03806e-10	-2.5342e-10	-2.52706e-10
1176	1.54286e-07	1.64258e-09	-2.36993e-10	-2.09157e-10	-2.45748e-10	2.8515e-10	3.12601e-07	1.03306e-09	-2.2186e-11	-1.7556e-10	-2.36264e-10	-2.52631e-10	-2.38301e-10	-2.33571e-10
1183	1.54339e-07	1.67774e-09	-2.42058e-10	-1.70271e-10	-2.42546e-10	2.95663e-10	3.12581e-07	1.01869e-09	-3.05893e-11	-1.66159e-10	-2.44063e-10	-2.49775e-10	-2.58085e-10	-2.67211e-10
1190	1.54346e-07	1.67368e-09	-2.35672e-10	-1.80327e-10	-2.53709e-10	2.67522e-10	3.12463e-07	1.02464e-09	-1.98378e-12	-1.78327e-10	-2.57646e-10	-2.53426e-10	-2.48188e-10	-2.46018e-10
1197	1.54306e-07	1.69455e-09	-2.45998e-10	-1.80632e-10	-2.47287e-10	2.95825e-10	3.12402e-07	1.03952e-09	-3.00763e-11	-1.66793e-10	-2.58527e-10	-2.48216e-10	-2.37662e-10	-2.43444e-10
1204	1.54318e-07	1.68414e-09	-2.57503e-10	-1.5982e-10	-2.43353e-10	3.08827e-10	3.13046e-07	1.03212e-09	-1.47e-11	-1.69277e-10	-2.47596e-10	-2.52022e-10	-2.5325e-10	-2.59008e-10
1211	1.54337e-07	1.64672e-09	-2.37083e-10	-2.06085e-10	-2.31906e-10	3.05783e-10	3.12724e-07	1.02445e-09	-2.36597e-11	-1.65482e-10	-2.29571e-10	-2.54594e-10	-2.49522e-10	-2.48232e-10
1218	1.54274e-07	1.64866e-09	-2.30992e-10	-1.92154e-10	-2.34788e-10	3.03635e-10	3.12622e-07	1.05506e-09	-3.14605e-11	-1.81854e-10	-2.49479e-10	-2.38204e-10	-2.52624e-10	-2.44239e-10
1225	1.54272e-07	1.67407e-09	-2.50382e-10	-1.91272e-10	-2.39549e-10	2.91604e-10	3.1277e-07	1.0271e-09	-3.12427e-11	-1.47308e-10	-2.48275e-10	-2.41977e-10	-2.17223e-10	-2.51201e-10
1232	1.54332e-07	1.64638e-09	-2.38839e-10	-1.72452e-10	-2.31147e-10	2.85197e-10	3.12499e-07	9.86202e-10	-1.60358e-11	-1.7303e-10	-2.51833e-10	-2.43177e-10	-2.58275e-10	-2.40331e-10
1239	1.54265e-07	1.647e-09	-2.62207e-10	-1.72023e-10	-2.37628e-10	2.76002e-10	3.12424e-07	1.05118e-09	-1.34446e-11	-1.17382e-10	-2.50656e-10	-2.44376e-10	-2.40935e-10	-2.3801e-10
1246	1.54215e-07	1.63985e-09	-2.42671e-10	-1.68989e-10	-2.23894e-10	3.13167e-10	3.12938e-07	1.05688e-09	-3.15912e-11	-1.85366e-10	-2.56455e-10	-2.54983e-10	-2.54098e-10	-2.53075e-10
1253	1.54212e-07	1.64968e-09	-2.408e-10	-1.70606e-10	-2.50269e-10	3.11713e-10	3.12277e-07	1.03948e-09	-5.51746e-12	-1.56192e-10	-2.32212e-10	-2.53313e-10	-2.19814e-10	-2.43997e-10
1260	1.54247e-07	1.65756e-09	-2.47764e-10	-1.84025e-10	-2.44876e-10	2.8299e-10	3.12374e-07	1.02794e-09	-1.92336e-11	-1.62149e-10	-2.52005e-10	-2.48745e-10	-2.51029e-10	-2.40038e-10
1267	1.54311e-07	1.69703e-09	-2.43655e-10	-1.72435e-10	-2.34936e-10	2.74028e-10	3.12846e-07	9.99936e-10	-1.63068e-11	-1.5126e-10	-2.63923e-10	-2.42339e-10	-2.4263e-10	-2.54589e-10
1274	1.54286e-07	1.68603e-09	-2.44848e-10	-1.86772e-10	-2.28101e-10	3.02448e-10	3.12702e-07	1.02583e-09	-2.68245e-11	-1.75523e-10	-2.48827e-10	-2.46631e-10	-2.53312e-10	-2.47771e-10
1281	1.54306e-07	1.67198e-09	-2.35187e-10	-1.98193e-10	-2.2734e-10	3.08063e-10	3.12324e-07	1.00456e-09	-2.043e-11	-1.70162e-10	-2.51058e-10	-2.36565e-10	-2.5418e-10	-2.4079e-10
1288	1.54298e-07	1.66286e-09	-2.46767e-10	-1.57384e-10	-2.47248e-10	2.68757e-10	3.12258e-07	1.02347e-09	-2.49198e-11	-1.34562e-10	-2.53791e-10	-2.43153e-10	-2.64978e-10	-2.25034e-10
1295	1.54225e-07	1.66877e-09	-2.53336e-10	-1.8684e-10	-2.48014e-10	2.85721e-10	3.13031e-07	9.99351e-10	-3.18436e-11	-1.8541e-10	-2.366e-10	-2.28809e-10	-2.53233e-10	-2.45576e-10
1302	1.54215e-07	1.66785e-09	-2.46329e-10	-1.71034e-10	-2.467e-10	3.14807e-10	3.12019e-07	1.02051e-09	-2.95078e-11	-1.81668e-10	-2.4592e-10	-2.53155e-10	-2.56601e-10	-2.4335e-10
1309	1.54154e-07	1.68702e-09	-2.511e-10	-1.83922e-10	-2.34818e-10	2.83389e-10	3.12216e-07	1.01579e-09	-4.91056e-12	-1.66305e-10	-2.35622e-10	-2.52272e-10	-2.54685e-10	-2.38431e-10
1316	1.54154e-07	1.66251e-09	-2.4855e-10	-1.80627e-10	-2.33778e-10	2.85938e-10	3.12887e-07	1.0547e-09	-1.76198e-11	-1.75605e-10	-2.60921e-10	-2.59776e-10	-2.31805e-10	-2.26853e-10
1323	1.54175e-07	1.63382e-09	-2.40821e-10	-1.85137e-10	-2.39761e-10	2.8482e-10	3.124e-07	1.03049e-09	-3.67281e-12	-1.63287e-10	-2.47345e-10	-2.41462e-10	-2.40537e-10	-2.5747e-10
1330	1.54202e-07	1.64788e-09	-2.43145e-10	-2.01399e-10	-2.40151e-10	2.81142e-10	3.1213e-07	1.04287e-09	-4.05037e-12	-1.82207e-10	-2.61731e-10	-2.52259e-10	-2.51633e-10	-2.45191e-10
1337	1.54211e-07	1.62307e-09	-2.46791e-10	-1.82164e-10	-2.37623e-10	2.76497e-10	3.12865e-07	1.02051e-09	-1.62408e-12	-1.66919e-10	-2.55248e-10	-2.48443e-10	-2.38551e-10	-2.64638e-10
1344	1.54187e-07	1.69349e-09	-2.38485e-10	-1.92189e-10	-2.38098e-10	2.86524e-10	3.12468e-07	1.00834e-09	-3.99752e-11	-1.83653e-10	-2.46922e-10	-2.52528e-10	-2.47679e-10	-2.39954e-10
1351	1.54238e-07	1.69825e-09	-2.39756e-10	-1.74751e-10	-2.47616e-10	2.75192e-10	3.12042e-07	1.00455e-09	-3.3076e-11	-1.79223e-10	-2.45998e-10	-2.24292e-10	-2.49368e-10	-2.49146e-10
1358	1.54173e-07	1.6696e-09	-2.54195e-10	-1.80933e-10	-2.48371e-10	2.67524e-10	3.12548e-07	1.04558e-09	-2.90469e-11	-1.6472e-10	-2.49525e-10	-2.47392e-10	-2.46339e-10	-2.49679e-10
1365	1.5415e-07	1.66602e-09	-2.58565e-10	-1.7331e-10	-2.23921e-10	2.91842e-10	3.12326e-07	1.01551e-09	-1.67436e-11	-1.75357e-10	-2.20904e-10	-2.51851e-10	-2.48348e-10	-2.52214e-10
1372	1.54148e-07	1.66251e-09	-2.61366e-10	-1.82333e-10	-2.40807e-10	2.94405e-10	3.11908e-07	1.03141e-09	-3.98107e-11	-1.56092e-10	-2.45073e-10	-2.50024e-10	-2.34842e-10	-2.49878e-10
1379	1.54106e-07	1.68157e-09	-2.35629e-10	-1.7511e-10	-2.45598e-10	2.67768e-10	3.12128e-07	1.07126e-09	-4.35089e-11	-1.75842e-10	-2.47876e-10	-2.47911e-10	-2.60124e-10	-2.39377e-10
1386	1.54094e-07	1.68538e-09	-2.5156e-10	-1.90417e-10	-2.61268e-10	2.81888e-10	3.12619e-07	1.03027e-09	-3.55289e-11	-1.70902e-10	-2.48138e-10	-2.52292e-10	-2.39606e-10	-2.60187e-10
1393	1.54151e-07	1.64405e-09	-2.44094e-10	-1.82145e-10	-2.47064e-10	2.82712e-10	3.12345e-07	1.04616e-09	-3.56732e-13	-1.8446e-10	-2.47812e-10	-2.46393e-10	-2.57175e-10	-2.52e-10
1400	1.54223e-07	1.65343e-09	-2.44197e-10	-1.80887e-10	-2.31483e-10	3.12334e-10	3.11776e-07	1.0626e-09	-4.21776e-11	-1.88523e-10	-2.60745e-10	-2.36234e-10	-2.44138e-10	-2.39866e-10
1407	1.5421e-07	1.6896e-09	-2.48206e-10	-1.7901e-10	-2.46225e-10	2.81157e-10	3.12595e-07	1.02158e-09	-1.72805e-11	-1.75663e-10	-2.39693e-10	-2.41712e-10	-2.59845e-10	-2.43262e-10
1414	1.54242e-07	1.676e-09	-2.20897e-10	-1.87054e-10	-2.55784e-10	2.9099e-10	3.12428e-07	1.03204e-09	-2.81965e-11	-1.85347e-10	-2.45433e-10	-2.45975e-10	-2.45289e-10	-2.51868e-10
1421	1.54235e-07	1.65335e-09	-2.29449e-10	-1.78566e-10	-2.35685e-10	2.86175e-10	3.1204e-07	1.01103e-09	-2.79961e-11	-1.81855e-10	-2.32081e-10	-2.48868e-10	-2.43944e-10	-2.25519e-10
1428	1.54208e-07	1.65632e-09	-2.47919e-10	-1.93657e-10	-2.41419e-10	2.90548e-10	3.12339e-07	1.00864e-09	-3.33372e-11	-1.63249e-10	-2.44478e-10	-2.31865e-10	-2.39905e-10	-2.68541e-10
1435	1.54213e-07	1.6346e-09	-2.30145e-10	-1.76365e-10	-2.48969e-10	2.74837e-10	3.12554e-07	1.0217e-09	-4.37968e-11	-1.75463e-10	-2.4717e-10	-2.49691e-10	-2.40715e-10	-2.43692e-10
1442	1.5426e-07	1.68059e-09	-2.45557e-10	-1.70191e-10	-2.3879e-10	2.83288e-10	3.1224e-07	1.02889e-09	-1.92554e-11	-1.91369e-10	-2.56819e-10	-2.54098e-10	-2.54217e-10	-2.429e-10
1449	1.54263e-07	1.66104e-09	-2.65997e-10	-1.86296e-10	-2.41319e-10	2.94794e-10	3.1266e-07	9.85493e-10	-3.45398e-11	-1.65115e-10	-2.57916e-10	-2.5144e-10	-2.56337e-10	-2.611e-10
1456	1.54265e-07	1.68235e-09	-2.33194e-10	-1.86788e-10	-2.33399e-10	2.73305e-10	3.12499e-07	1.00483e-09	-2.45781e-11	-1.74882e-10	-2.49648e-10	-2.44408e-10	-2.56297e-10	-2.41484e-10
1463	1.54284e-07	1.6787e-09	-2.61258e-10	-1.9226e-10	-2.26932e-10	2.93753e-10	3.12611e-07	1.04331e-09	-1.42156e-11	-1.80515e-10	-2.27468e-10	-2.31515e-10	-2.48045e-10	-2.30114e-10
1470	1.54229e-07	1.64771e-09	-2.49912e-10	-1.81481e-10	-2.53006e-10	2.82678e-10	3.12578e-07	1.03422e-09	-3.18703e-11	-1.72627e-10	-2.56276e-10	-2.4668e-10	-2.22598e-10	-2.26993e-10
1477	1.54235e-07	1.63563e-09	-2.5542e-10	-1.77163e-10	-2.41258e-10	2.87598e-10	3.12996e-07	9.82104e-10	-1.80806e-11	-1.68879e-10	-2.54335e-10	-2.49535e-10	-2.57341e-10	-2.52966e-10
1484	1.54201e-07	1.66046e-09	-2.3389e-10	-1.87817e-10	-2.42949e-10	3.00849e-10	3.12115e-07	1.03963e-09	-4.66685e-11	-1.74283e-10	-2.40728e-10	-2.51664e-10	-2.57537e-10	-2.5645e-10
1491	1.5432e-07	1.65112e-09	-2.29386e-10	-1.71573e-10	-2.46341e-10	2.88169e-10	3.12336e-07	1.02153e-09	-3.29567e-11	-1.73233e-10	-2.49101e-10	-2.49908e-10	-2.30381e-10	-2.40462e-10
1498	1.54261e-07	1.6545e-09	-2.46418e-10	-1.70223e-10	-2.51714e-10	2.80285e-10	3.1245e-07	1.03599e-09	-9.23409e-12	-1.56805e-10	-2.46009e-10	-2.49742e-10	-2.32885e-10	-2.39728e-10
1505	1.54211e-07	1.66904e-09	-2.43434e-10	-1.70663e-10	-2.51846e-10	2.8178e-10	3.1215e-07	1.00611e-09	-2.06851e-11	-1.60643e-10	-2.38585e-10	-2.46646e-10	-2.48173e-10	-2.45458e-10
1512	1.5425e-07	1.66521e-09	-2.43265e-10	-1.54987e-10	-2.21209e-10	2.76109e-10	3.12448e-07	1.03658e-09	-1.58834e-11	-1.86572e-10	-2.4262e-10	-2.32613e-10	-2.51945e-10	-2.5759e-10
1519	1.54218e-07	1.66905e-09	-2.45866e-10	-1.76471e-10	-2.36699e-10	2.75036e-10	3.12535e-07	1.0336e-09	-1.49765e-11	-1.85546e-10	-2.52783e-10	-2.47187e-10	-2.5521e-10	-2.45491e-10
1526	1.54201e-07	1.68918e-09	-2.44615e-10	-1.85597e-10	-2.284e-10	3.05776e-10	3.12602e-07	1.00496e-09	-4.37666e-11	-1.82592e-10	-2.41359e-10	-2.28235e-10	-2.51332e-10	-2.40284e-10
1533	1.5425e-07	1.69948e-09	-2.39088e-10	-1.65705e-10	-2.41763e-10	2.97745e-10	3.12043e-07	1.02802e-09	-1.35894e-11	-1.67987e-10	-2.39507e-10	-2.61573e-10	-2.4398e-10	-2.48327e-10
1540	1.54222e-07	1.65308e-09	-2.38554e-10	-1.83087e-10	-2.26696e-10	3.15608e-10	3.12725e-07	1.0419e-09	-1.35687e-11	-1.56166e-10	-2.60879e-10	-2.56469e-10	-2.53583e-10	-2.40692e-10
1547	1.54223e-07	1.63227e-09	-2.37938e-10	-1.97022e-10	-2.49957e-10	2.89916e-10	3.12464e-07	1.02915e-09	-8.11758e-12	-1.76192e-10	-2.6633e-10	-2.42121e-10	-2.60806e-10	-2.55978e-10
1554	1.54261e-07	1.68422e-09	-2.49447e-10	-1.76848e-10	-2.17698e-10	3.02482e-10	3.12384e-07	1.00939e-09	-1.48092e-11	-1.92001e-10	-2.46614e-10	-2.42224e-10	-2.60665e-10	-2.61032e-10
OAA_3 (total pressure = 0.030 bar, furnace T = 85.1 °C, initial reactor position = 6 mm)
Time (s)	Total signal intesity	m/z 2	m/z 12	m/z 14	m/z 15	m/z 18	m/z 40	m/z 28	m/z 32	m/z 44	m/z 33	m/z 34	m/z 48	m/z 64
0	1.56647e-07	1.29601e-09	-1.59969e-10	-1.23734e-10	-1.62354e-10	3.67701e-10	3.09212e-07	9.72275e-10	3.87956e-11	-1.00576e-10	-1.6793e-10	-1.85584e-10	-1.73833e-10	-1.87786e-10
7	1.56195e-07	1.3034e-09	-1.75003e-10	-1.06607e-10	-1.73458e-10	3.57967e-10	3.10069e-07	9.52633e-10	4.0307e-11	-1.11237e-10	-1.73388e-10	-1.81657e-10	-1.80993e-10	-1.88443e-10
14	1.56275e-07	1.25823e-09	-1.9118e-10	-1.02335e-10	-1.66144e-10	3.6116e-10	3.09687e-07	9.75954e-10	4.2251e-11	-1.10935e-10	-1.81061e-10	-1.68887e-10	-1.7732e-10	-1.54812e-10
21	1.56151e-07	1.27864e-09	-1.77636e-10	-1.16554e-10	-1.82257e-10	3.53202e-10	3.09848e-07	9.48073e-10	6.2083e-11	-9.34767e-11	-1.75669e-10	-1.57809e-10	-1.84662e-10	-1.74291e-10
28	1.56089e-07	1.30703e-09	-1.6111e-10	-1.30658e-10	-1.58964e-10	3.68103e-10	3.09557e-07	9.49022e-10	4.94721e-11	-1.01346e-10	-1.8384e-10	-1.87206e-10	-1.7283e-10	-1.77957e-10
35	1.56092e-07	1.26898e-09	-1.54747e-10	-1.12126e-10	-1.73961e-10	3.72089e-10	3.09838e-07	9.74282e-10	4.38457e-11	-1.0003e-10	-1.5178e-10	-1.69925e-10	-1.54719e-10	-1.78176e-10
42	1.56119e-07	1.28468e-09	-1.70584e-10	-1.22827e-10	-1.66663e-10	3.51302e-10	3.09819e-07	9.8127e-10	5.60437e-11	-1.08633e-10	-1.66756e-10	-1.78229e-10	-1.75877e-10	-1.73194e-10
49	1.56384e-07	1.29786e-09	-1.71532e-10	-1.07056e-10	-1.77046e-10	3.59164e-10	3.10294e-07	1.34818e-09	1.02795e-10	-1.60405e-11	-1.9412e-10	-1.77124e-10	-1.92831e-10	-1.82282e-10
56	1.56336e-07	1.33653e-09	-1.4706e-10	-8.034e-11	-1.59895e-10	4.1176e-10	3.08098e-07	2.73246e-09	2.31279e-10	7.82614e-10	-1.74682e-10	-1.66219e-10	-1.84512e-10	-1.78662e-10
63	1.55693e-07	1.31442e-09	-9.15789e-11	-3.75657e-11	-1.74718e-10	5.48519e-10	3.05335e-07	3.94149e-09	2.88732e-10	1.94628e-09	-1.72259e-10	-1.744e-10	-1.77441e-10	-1.8014e-10
70	1.54926e-07	1.34661e-09	-1.16704e-11	-3.88596e-11	-1.63132e-10	6.84621e-10	3.03344e-07	4.65339e-09	3.19941e-10	2.90722e-09	-1.89169e-10	-1.69322e-10	-1.87072e-10	-1.75992e-10
77	1.54481e-07	1.36309e-09	9.25768e-12	-2.77559e-11	-1.62972e-10	8.33468e-10	3.01543e-07	5.03044e-09	3.20254e-10	3.3787e-09	-1.85248e-10	-1.64029e-10	-1.66696e-10	-1.67839e-10
84	1.54256e-07	1.41394e-09	1.09609e-11	-2.69482e-11	-1.61544e-10	9.11252e-10	3.01841e-07	5.19488e-09	2.92912e-10	3.51776e-09	-1.80886e-10	-1.91337e-10	-1.74545e-10	-1.71214e-10
91	1.54229e-07	1.43299e-09	3.91387e-11	-1.25272e-11	-1.62021e-10	1.00063e-09	3.0118e-07	5.18263e-09	3.12551e-10	3.49961e-09	-1.80036e-10	-1.70169e-10	-1.7792e-10	-1.70493e-10
98	1.54245e-07	1.43257e-09	3.5904e-11	-5.83824e-12	-1.70119e-10	1.09318e-09	3.02181e-07	4.98285e-09	2.82089e-10	3.3487e-09	-1.65596e-10	-1.70884e-10	-1.72209e-10	-1.74505e-10
105	1.54437e-07	1.48488e-09	1.50513e-11	-3.9529e-11	-1.50999e-10	1.09743e-09	3.02188e-07	4.88529e-09	2.67238e-10	3.13986e-09	-1.76367e-10	-1.93685e-10	-1.6509e-10	-1.69277e-10
112	1.54492e-07	1.47137e-09	-4.60401e-12	-4.44332e-11	-1.70741e-10	1.14489e-09	3.03095e-07	4.65028e-09	2.68325e-10	2.91695e-09	-1.71975e-10	-1.6822e-10	-1.75933e-10	-1.81174e-10
119	1.54616e-07	1.47733e-09	-1.91278e-12	-4.47273e-11	-1.66442e-10	1.14256e-09	3.03693e-07	4.4056e-09	2.63157e-10	2.71175e-09	-1.85001e-10	-1.82668e-10	-1.79007e-10	-1.90098e-10
126	1.55484e-07	1.49076e-09	-2.10244e-11	-4.40551e-11	-1.83003e-10	1.12693e-09	3.0555e-07	4.21874e-09	2.38553e-10	2.50824e-09	-1.58281e-10	-1.77233e-10	-1.79405e-10	-1.71351e-10
133	1.56166e-07	1.51472e-09	-1.40247e-11	-4.80177e-11	-1.67494e-10	1.12786e-09	3.07302e-07	4.05219e-09	2.31941e-10	2.37884e-09	-1.70698e-10	-1.77252e-10	-1.73166e-10	-1.72611e-10
140	1.56517e-07	1.49321e-09	-3.44286e-11	-4.07218e-11	-1.59974e-10	1.11889e-09	3.07484e-07	3.85388e-09	2.36397e-10	2.18685e-09	-1.5801e-10	-1.72624e-10	-1.63893e-10	-1.85132e-10
147	1.56709e-07	1.49038e-09	-4.87558e-11	-4.72158e-11	-1.66777e-10	1.10855e-09	3.08441e-07	3.67143e-09	2.14012e-10	2.06298e-09	-1.86447e-10	-1.77936e-10	-1.83918e-10	-1.79203e-10
154	1.56956e-07	1.49367e-09	-6.13515e-11	-7.16498e-11	-1.53782e-10	1.11586e-09	3.0884e-07	3.50923e-09	2.27544e-10	1.88427e-09	-1.64704e-10	-1.77118e-10	-1.7781e-10	-1.76969e-10
161	1.57041e-07	1.51612e-09	-4.25197e-11	-7.44041e-11	-1.65355e-10	1.0723e-09	3.0975e-07	3.37674e-09	1.92748e-10	1.73537e-09	-1.71993e-10	-1.74275e-10	-1.76027e-10	-1.80252e-10
168	1.57113e-07	1.4776e-09	-7.15955e-11	-7.40877e-11	-1.80488e-10	1.13168e-09	3.09874e-07	3.23654e-09	1.89912e-10	1.63442e-09	-1.77746e-10	-1.81381e-10	-1.61584e-10	-1.8317e-10
175	1.57214e-07	1.50218e-09	-8.25995e-11	-8.24287e-11	-1.78191e-10	1.05029e-09	3.10396e-07	3.06584e-09	1.51445e-10	1.49047e-09	-1.7766e-10	-1.727e-10	-1.75072e-10	-1.88279e-10
182	1.57268e-07	1.51304e-09	-1.10745e-10	-8.37007e-11	-1.71798e-10	1.07534e-09	3.10254e-07	2.96142e-09	2.01557e-10	1.4e-09	-1.6378e-10	-1.78124e-10	-1.71778e-10	-1.86041e-10
189	1.5729e-07	1.48626e-09	-9.36582e-11	-7.37842e-11	-1.70295e-10	1.02574e-09	3.10441e-07	2.81944e-09	1.79663e-10	1.28005e-09	-1.81647e-10	-1.82355e-10	-1.54018e-10	-1.76671e-10
196	1.57341e-07	1.49725e-09	-8.55331e-11	-9.49863e-11	-1.7098e-10	1.01545e-09	3.1043e-07	2.68166e-09	1.46953e-10	1.17878e-09	-1.78328e-10	-1.75568e-10	-1.48094e-10	-1.65617e-10
203	1.5636e-07	1.47964e-09	-1.21996e-10	-1.05438e-10	-1.62471e-10	9.95125e-10	3.08283e-07	2.60465e-09	1.53702e-10	1.07157e-09	-1.73312e-10	-1.79941e-10	-1.70997e-10	-1.78785e-10
210	1.55896e-07	1.49162e-09	-9.70834e-11	-6.96257e-11	-1.68459e-10	9.73508e-10	3.08724e-07	2.51999e-09	1.53541e-10	9.6956e-10	-1.85598e-10	-1.71606e-10	-1.84527e-10	-1.80925e-10
217	1.55787e-07	1.47989e-09	-1.12985e-10	-9.21293e-11	-1.74463e-10	9.57789e-10	3.08228e-07	2.37438e-09	1.37798e-10	8.82288e-10	-1.85493e-10	-1.77752e-10	-1.94317e-10	-1.88485e-10
224	1.5578e-07	1.50437e-09	-1.18813e-10	-5.76461e-11	-1.49506e-10	9.19112e-10	3.08554e-07	2.31724e-09	1.45485e-10	8.24246e-10	-1.85681e-10	-1.65159e-10	-1.84268e-10	-1.57052e-10
231	1.55791e-07	1.49313e-09	-1.27225e-10	-1.01671e-10	-1.70006e-10	9.36188e-10	3.08378e-07	2.21857e-09	1.26631e-10	7.31256e-10	-1.78954e-10	-1.86428e-10	-1.79532e-10	-1.72332e-10
238	1.55817e-07	1.46615e-09	-1.33437e-10	-8.50578e-11	-1.62925e-10	9.14945e-10	3.08904e-07	2.17134e-09	1.17189e-10	7.08632e-10	-1.61114e-10	-1.84487e-10	-1.87339e-10	-1.72434e-10
245	1.55769e-07	1.46735e-09	-1.16692e-10	-9.2851e-11	-1.67813e-10	8.98093e-10	3.08803e-07	2.08523e-09	1.36222e-10	6.56631e-10	-1.67937e-10	-1.67894e-10	-1.72706e-10	-1.70532e-10
252	1.55832e-07	1.44457e-09	-1.49427e-10	-9.01244e-11	-1.67107e-10	8.39507e-10	3.08947e-07	2.05207e-09	1.30289e-10	6.07542e-10	-1.7357e-10	-1.76976e-10	-1.8189e-10	-1.79774e-10
259	1.55899e-07	1.45698e-09	-1.23197e-10	-9.30567e-11	-1.68025e-10	8.48712e-10	3.08853e-07	1.90946e-09	1.42425e-10	5.20685e-10	-1.84684e-10	-1.8978e-10	-1.73958e-10	-1.77368e-10
266	1.55869e-07	1.45995e-09	-1.35259e-10	-1.07212e-10	-1.6789e-10	8.62805e-10	3.09122e-07	1.91734e-09	1.25605e-10	5.01737e-10	-1.68384e-10	-1.7862e-10	-1.76624e-10	-1.88688e-10
273	1.55852e-07	1.48488e-09	-1.60368e-10	-8.59522e-11	-1.58592e-10	8.24996e-10	3.09534e-07	1.87366e-09	1.24968e-10	4.24339e-10	-1.59753e-10	-1.87431e-10	-1.71147e-10	-1.92812e-10
280	1.55867e-07	1.46336e-09	-1.55602e-10	-1.16154e-10	-1.63515e-10	8.17022e-10	3.09609e-07	1.81079e-09	9.97608e-11	4.32309e-10	-1.53452e-10	-1.73468e-10	-1.75702e-10	-1.69119e-10
287	1.55835e-07	1.45556e-09	-1.34482e-10	-1.06947e-10	-1.69936e-10	8.14645e-10	3.09732e-07	1.74472e-09	9.23181e-11	3.63937e-10	-1.65301e-10	-1.81121e-10	-1.74578e-10	-1.68913e-10
294	1.55937e-07	1.49043e-09	-1.57091e-10	-1.20512e-10	-1.60144e-10	8.00733e-10	3.09295e-07	1.71954e-09	1.17415e-10	3.35316e-10	-1.77986e-10	-1.74542e-10	-1.80619e-10	-1.78904e-10
301	1.55942e-07	1.45759e-09	-1.51759e-10	-9.4622e-11	-1.50492e-10	7.64175e-10	3.09648e-07	1.69021e-09	1.19291e-10	3.29679e-10	-1.77061e-10	-1.81115e-10	-1.92117e-10	-1.83907e-10
308	1.56026e-07	1.43802e-09	-1.48639e-10	-1.0407e-10	-1.67051e-10	7.82231e-10	3.09465e-07	1.6439e-09	1.00844e-10	2.86799e-10	-1.655e-10	-1.71439e-10	-1.77368e-10	-1.79448e-10
315	1.56014e-07	1.44766e-09	-1.65822e-10	-1.2346e-10	-1.75436e-10	7.54235e-10	3.10013e-07	1.64871e-09	9.12028e-11	2.61699e-10	-1.76569e-10	-1.83834e-10	-1.88585e-10	-1.84393e-10
322	1.5597e-07	1.44334e-09	-1.58314e-10	-1.05748e-10	-1.59947e-10	7.37611e-10	3.09904e-07	1.57989e-09	1.08938e-10	2.5259e-10	-1.7907e-10	-1.72953e-10	-1.7859e-10	-1.65246e-10
329	1.55989e-07	1.44221e-09	-1.70274e-10	-1.16529e-10	-1.64765e-10	7.52994e-10	3.0988e-07	1.52824e-09	8.09379e-11	2.23639e-10	-1.6555e-10	-1.78779e-10	-1.8384e-10	-1.65463e-10
336	1.56073e-07	1.43691e-09	-1.56146e-10	-1.20317e-10	-1.69926e-10	7.36155e-10	3.10374e-07	1.5106e-09	7.47336e-11	1.94084e-10	-1.6717e-10	-1.77277e-10	-1.77396e-10	-1.73464e-10
343	1.56048e-07	1.41997e-09	-1.58295e-10	-1.13021e-10	-1.81237e-10	7.26761e-10	3.10188e-07	1.46742e-09	9.24437e-11	1.55384e-10	-1.69077e-10	-1.72884e-10	-1.87817e-10	-1.71663e-10
350	1.56064e-07	1.41921e-09	-1.59093e-10	-1.00277e-10	-1.70489e-10	6.94793e-10	3.10165e-07	1.48943e-09	8.17461e-11	1.43553e-10	-1.74268e-10	-1.86285e-10	-1.86906e-10	-1.92535e-10
357	1.56096e-07	1.42518e-09	-1.66985e-10	-1.06799e-10	-1.63307e-10	6.79865e-10	3.10397e-07	1.46786e-09	1.04698e-10	1.49387e-10	-1.77809e-10	-1.57325e-10	-1.85108e-10	-1.61855e-10
364	1.56074e-07	1.43798e-09	-1.67955e-10	-1.05951e-10	-1.78302e-10	6.79163e-10	3.10365e-07	1.40183e-09	9.59922e-11	1.16256e-10	-1.86356e-10	-1.76273e-10	-1.76372e-10	-1.76656e-10
371	1.56067e-07	1.41407e-09	-1.63483e-10	-1.13187e-10	-1.74408e-10	7.02601e-10	3.10648e-07	1.39508e-09	8.93808e-11	1.22686e-10	-1.7164e-10	-1.79762e-10	-1.74358e-10	-1.74267e-10
378	1.56044e-07	1.42171e-09	-1.54403e-10	-1.16054e-10	-1.60096e-10	6.67534e-10	3.10454e-07	1.38915e-09	9.05455e-11	8.62538e-11	-1.75005e-10	-1.64981e-10	-1.5175e-10	-1.84222e-10
385	1.56047e-07	1.42564e-09	-1.52964e-10	-1.1529e-10	-1.69329e-10	6.88125e-10	3.10649e-07	1.3615e-09	1.03447e-10	8.97742e-11	-1.77422e-10	-1.67495e-10	-1.69349e-10	-1.60735e-10
392	1.56038e-07	1.48064e-09	-1.68542e-10	-1.0025e-10	-1.77556e-10	6.49131e-10	3.10395e-07	1.36992e-09	9.17739e-11	7.97692e-11	-1.85152e-10	-1.78019e-10	-1.74022e-10	-1.81236e-10
399	1.56089e-07	1.43769e-09	-1.65116e-10	-1.08194e-10	-1.58592e-10	6.56026e-10	3.10991e-07	1.35134e-09	8.93805e-11	5.49148e-11	-1.68938e-10	-1.74312e-10	-1.82148e-10	-1.79627e-10
406	1.56096e-07	1.41126e-09	-1.72075e-10	-1.01649e-10	-1.66765e-10	6.29864e-10	3.10574e-07	1.36716e-09	9.95644e-11	4.32165e-11	-1.68472e-10	-1.75066e-10	-1.59819e-10	-1.89652e-10
413	1.56121e-07	1.4136e-09	-1.59891e-10	-1.11303e-10	-1.64147e-10	6.00474e-10	3.10978e-07	1.31006e-09	7.66184e-11	5.76443e-11	-1.68365e-10	-1.86604e-10	-1.86674e-10	-1.81009e-10
420	1.5613e-07	1.42704e-09	-1.60325e-10	-1.16483e-10	-1.80895e-10	6.00783e-10	3.10419e-07	1.33965e-09	7.87e-11	5.17812e-11	-1.81304e-10	-1.60199e-10	-1.82665e-10	-1.68944e-10
427	1.56156e-07	1.38816e-09	-1.53332e-10	-1.20019e-10	-1.85729e-10	5.94209e-10	3.10806e-07	1.28764e-09	7.57021e-11	4.15609e-11	-1.69372e-10	-1.86312e-10	-1.79039e-10	-1.69815e-10
434	1.56208e-07	1.40214e-09	-1.66168e-10	-8.64077e-11	-1.67441e-10	6.07299e-10	3.10725e-07	1.30277e-09	7.0638e-11	2.68201e-11	-1.82125e-10	-1.69467e-10	-1.72778e-10	-1.63246e-10
441	1.56198e-07	1.43279e-09	-1.52676e-10	-9.24123e-11	-1.58921e-10	6.12699e-10	3.11195e-07	1.28615e-09	1.12252e-10	1.89336e-11	-1.83118e-10	-1.82399e-10	-1.86549e-10	-1.89928e-10
448	1.5623e-07	1.42753e-09	-1.72599e-10	-1.14471e-10	-1.76705e-10	5.89733e-10	3.11114e-07	1.27712e-09	7.41736e-11	-5.74084e-12	-1.8198e-10	-1.58482e-10	-1.88264e-10	-1.8334e-10
455	1.56204e-07	1.40943e-09	-1.65755e-10	-1.1232e-10	-1.66105e-10	6.12508e-10	3.11001e-07	1.26401e-09	8.83888e-11	-1.21767e-13	-1.69982e-10	-1.75313e-10	-1.77944e-10	-1.64926e-10
462	1.56117e-07	1.4185e-09	-1.73403e-10	-1.13338e-10	-1.59896e-10	5.86971e-10	3.11e-07	1.26127e-09	7.6892e-11	-6.89688e-12	-1.65732e-10	-1.67297e-10	-1.84215e-10	-1.6781e-10
469	1.561e-07	1.42229e-09	-1.66077e-10	-8.83516e-11	-1.65455e-10	5.75912e-10	3.11e-07	1.23885e-09	8.6365e-11	-3.46209e-11	-1.71538e-10	-1.7963e-10	-1.82453e-10	-1.91619e-10
476	1.56142e-07	1.39554e-09	-1.46636e-10	-1.05757e-10	-1.6833e-10	5.78842e-10	3.11428e-07	1.24712e-09	7.50578e-11	-1.72993e-11	-1.66082e-10	-1.73723e-10	-1.89462e-10	-1.72529e-10
483	1.5617e-07	1.41162e-09	-1.68199e-10	-1.06745e-10	-1.62297e-10	5.78599e-10	3.11229e-07	1.26279e-09	7.8115e-11	-7.80156e-12	-1.8202e-10	-1.86122e-10	-1.60093e-10	-1.81322e-10
490	1.5622e-07	1.43153e-09	-1.68899e-10	-9.47377e-11	-1.63457e-10	5.93822e-10	3.11261e-07	1.23676e-09	7.69077e-11	-2.32286e-11	-1.68907e-10	-1.77595e-10	-1.78546e-10	-1.87429e-10
497	1.56187e-07	1.42316e-09	-1.73393e-10	-1.05159e-10	-1.63761e-10	5.59963e-10	3.10853e-07	1.20468e-09	7.89424e-11	-4.23125e-11	-1.70797e-10	-1.75713e-10	-1.73635e-10	-1.85893e-10
504	1.56204e-07	1.39903e-09	-1.56638e-10	-1.10922e-10	-1.69653e-10	5.58754e-10	3.11332e-07	1.21369e-09	9.19565e-11	-2.08291e-11	-1.7829e-10	-1.81743e-10	-1.76494e-10	-1.67235e-10
511	1.56191e-07	1.44115e-09	-1.72719e-10	-9.74085e-11	-1.39993e-10	5.47717e-10	3.11495e-07	1.19896e-09	9.88659e-11	-4.2467e-11	-1.8912e-10	-1.71457e-10	-1.88544e-10	-1.77173e-10
518	1.56175e-07	1.43398e-09	-1.64394e-10	-9.60434e-11	-1.62774e-10	5.7478e-10	3.11168e-07	1.24654e-09	9.20909e-11	-3.37352e-11	-1.82423e-10	-1.69988e-10	-1.67111e-10	-1.81148e-10
525	1.56181e-07	1.39348e-09	-1.58982e-10	-8.58641e-11	-1.68762e-10	5.58912e-10	3.11243e-07	1.21463e-09	8.93982e-11	-1.70924e-11	-1.69225e-10	-1.70861e-10	-1.85009e-10	-1.63408e-10
532	1.56173e-07	1.41458e-09	-1.60024e-10	-1.1278e-10	-1.70265e-10	5.6419e-10	3.11206e-07	1.18688e-09	7.84153e-11	-4.42783e-11	-1.83018e-10	-1.76144e-10	-1.60126e-10	-1.85085e-10
539	1.56163e-07	1.39765e-09	-1.5571e-10	-9.46558e-11	-1.7491e-10	5.46573e-10	3.11367e-07	1.21569e-09	8.91697e-11	-4.40651e-11	-1.64127e-10	-1.91541e-10	-1.638e-10	-1.86119e-10
546	1.56261e-07	1.40264e-09	-1.71638e-10	-1.1063e-10	-1.77705e-10	5.29813e-10	3.11055e-07	1.18237e-09	5.90095e-11	-5.19207e-11	-1.65693e-10	-1.7314e-10	-1.82307e-10	-1.74706e-10
553	1.56274e-07	1.38806e-09	-1.69798e-10	-9.93991e-11	-1.65744e-10	5.3039e-10	3.11511e-07	1.20192e-09	8.52242e-11	-5.62693e-11	-1.90801e-10	-1.76657e-10	-1.7624e-10	-1.7607e-10
560	1.56215e-07	1.39074e-09	-1.64863e-10	-1.10684e-10	-1.71995e-10	5.29199e-10	3.10947e-07	1.21998e-09	7.68187e-11	-6.62506e-11	-1.67611e-10	-1.78655e-10	-1.65223e-10	-1.79064e-10
567	1.56253e-07	1.40218e-09	-1.6803e-10	-1.26891e-10	-1.69874e-10	5.28073e-10	3.1172e-07	1.21658e-09	8.55914e-11	-4.873e-11	-1.80675e-10	-1.82735e-10	-1.68624e-10	-1.70689e-10
574	1.56223e-07	1.43784e-09	-1.67631e-10	-1.01977e-10	-1.63377e-10	5.4237e-10	3.1108e-07	1.18001e-09	6.77121e-11	-3.91034e-11	-1.92392e-10	-1.7241e-10	-1.70515e-10	-1.70388e-10
581	1.5627e-07	1.39813e-09	-1.72449e-10	-1.08726e-10	-1.70712e-10	5.28359e-10	3.11695e-07	1.18392e-09	7.51525e-11	-2.66815e-11	-1.84587e-10	-1.65335e-10	-1.78319e-10	-1.70529e-10
588	1.56163e-07	1.42792e-09	-1.55215e-10	-1.07149e-10	-1.53732e-10	5.41857e-10	3.11336e-07	1.18871e-09	7.23135e-11	-2.51465e-11	-1.84758e-10	-1.79651e-10	-1.68372e-10	-1.73794e-10
595	1.56134e-07	1.39384e-09	-1.71342e-10	-9.62196e-11	-1.82462e-10	5.54007e-10	3.11277e-07	1.2016e-09	7.49749e-11	-7.03042e-11	-1.67905e-10	-1.82966e-10	-1.66955e-10	-1.80251e-10
602	1.56185e-07	1.37947e-09	-1.68801e-10	-1.22888e-10	-1.64439e-10	5.37056e-10	3.11495e-07	1.16778e-09	7.95635e-11	-7.10823e-11	-1.76712e-10	-1.88539e-10	-1.69714e-10	-1.80928e-10
609	1.56211e-07	1.41839e-09	-1.75873e-10	-1.07576e-10	-1.69821e-10	5.31556e-10	3.11145e-07	1.18133e-09	7.68289e-11	-5.57412e-11	-1.66502e-10	-1.70639e-10	-1.62631e-10	-1.70324e-10
616	1.56198e-07	1.39445e-09	-1.70769e-10	-1.17791e-10	-1.67349e-10	5.35805e-10	3.11328e-07	1.16145e-09	7.37825e-11	-7.72852e-11	-1.8664e-10	-1.86763e-10	-1.79163e-10	-1.76108e-10
623	1.56229e-07	1.3861e-09	-1.81453e-10	-1.06145e-10	-1.66511e-10	4.85684e-10	3.1126e-07	1.16016e-09	7.89184e-11	-6.09546e-11	-1.65329e-10	-1.70056e-10	-1.73076e-10	-1.71682e-10
630	1.56216e-07	1.37915e-09	-1.66601e-10	-1.02216e-10	-1.67858e-10	5.01634e-10	3.11915e-07	1.16843e-09	7.16301e-11	-7.75671e-11	-1.69844e-10	-1.83312e-10	-1.78123e-10	-1.80228e-10
637	1.56173e-07	1.38918e-09	-1.68329e-10	-1.1448e-10	-1.75303e-10	4.85295e-10	3.1142e-07	1.15893e-09	7.3274e-11	-5.62844e-11	-1.85751e-10	-1.83728e-10	-1.6825e-10	-1.68417e-10
644	1.56144e-07	1.38694e-09	-1.75246e-10	-1.07924e-10	-1.77996e-10	5.25978e-10	3.11286e-07	1.18168e-09	1.04615e-10	-6.73358e-11	-1.93346e-10	-1.68389e-10	-1.70623e-10	-1.62922e-10
651	1.5613e-07	1.38062e-09	-1.64262e-10	-1.12693e-10	-1.58644e-10	5.16325e-10	3.11385e-07	1.16222e-09	6.51096e-11	-6.24597e-11	-1.8624e-10	-1.5451e-10	-1.78328e-10	-1.81553e-10
658	1.56226e-07	1.41305e-09	-1.77114e-10	-9.49857e-11	-1.6939e-10	5.16688e-10	3.11541e-07	1.13655e-09	6.37067e-11	-6.07295e-11	-1.75436e-10	-1.83037e-10	-1.62118e-10	-1.81939e-10
665	1.56174e-07	1.38424e-09	-1.68353e-10	-1.03715e-10	-1.77271e-10	4.79552e-10	3.11327e-07	1.18036e-09	1.10892e-10	-8.00515e-11	-1.6944e-10	-1.68815e-10	-1.75842e-10	-1.75731e-10
672	1.56119e-07	1.3736e-09	-1.61019e-10	-1.17757e-10	-1.78351e-10	4.79196e-10	3.11046e-07	1.15029e-09	8.94693e-11	-6.87837e-11	-1.68669e-10	-1.79281e-10	-1.71778e-10	-1.80837e-10
679	1.56103e-07	1.40144e-09	-1.64335e-10	-1.40494e-10	-1.71956e-10	4.87512e-10	3.11596e-07	1.15594e-09	8.33051e-11	-6.53034e-11	-1.65059e-10	-1.79846e-10	-1.66924e-10	-1.77493e-10
686	1.56179e-07	1.40249e-09	-1.61265e-10	-1.0393e-10	-1.77695e-10	4.88169e-10	3.11095e-07	1.1726e-09	6.85951e-11	-5.5799e-11	-1.57872e-10	-1.66464e-10	-1.89236e-10	-1.84454e-10
693	1.56207e-07	1.36597e-09	-1.6936e-10	-1.15334e-10	-1.77954e-10	4.99312e-10	3.11424e-07	1.16695e-09	7.78497e-11	-5.67626e-11	-1.69258e-10	-1.68524e-10	-1.97333e-10	-1.78226e-10
700	1.56142e-07	1.40005e-09	-1.75655e-10	-1.00716e-10	-1.75587e-10	4.71639e-10	3.10828e-07	1.13802e-09	7.49831e-11	-7.89064e-11	-1.88031e-10	-1.66263e-10	-1.82134e-10	-1.82955e-10
707	1.56198e-07	1.37496e-09	-1.70413e-10	-1.12663e-10	-1.7176e-10	4.6658e-10	3.11343e-07	1.1379e-09	6.78886e-11	-7.91265e-11	-1.82124e-10	-1.57059e-10	-1.78072e-10	-1.79837e-10
714	1.5613e-07	1.41036e-09	-1.77086e-10	-8.54566e-11	-1.59388e-10	4.82494e-10	3.11108e-07	1.14265e-09	7.58779e-11	-8.44058e-11	-1.65033e-10	-1.82716e-10	-1.82597e-10	-1.81548e-10
721	1.56132e-07	1.41084e-09	-1.682e-10	-1.32495e-10	-1.69662e-10	4.82434e-10	3.11059e-07	1.17481e-09	7.97036e-11	-5.81898e-11	-1.73549e-10	-1.6195e-10	-1.85653e-10	-1.79978e-10
728	1.5616e-07	1.40398e-09	-1.60667e-10	-1.01861e-10	-1.77132e-10	4.827e-10	3.11421e-07	1.14507e-09	8.08739e-11	-7.77769e-11	-1.76198e-10	-1.84185e-10	-1.81652e-10	-1.77705e-10
735	1.56161e-07	1.40804e-09	-1.77857e-10	-1.1174e-10	-1.7373e-10	4.55757e-10	3.11223e-07	1.12806e-09	8.62647e-11	-7.73394e-11	-1.60939e-10	-1.76848e-10	-1.77513e-10	-1.88405e-10
742	1.56145e-07	1.39872e-09	-1.7084e-10	-1.26797e-10	-1.63459e-10	4.93243e-10	3.10831e-07	1.14785e-09	7.04387e-11	-8.62215e-11	-1.64611e-10	-1.6541e-10	-1.78017e-10	-1.77906e-10
749	1.56102e-07	1.36644e-09	-1.81751e-10	-1.06746e-10	-1.43345e-10	4.67703e-10	3.11135e-07	1.14065e-09	5.8372e-11	-7.06269e-11	-1.63334e-10	-1.79085e-10	-1.74842e-10	-1.69519e-10
756	1.56137e-07	1.38259e-09	-1.76285e-10	-1.15054e-10	-1.49746e-10	4.74698e-10	3.11202e-07	1.14921e-09	6.70316e-11	-6.3904e-11	-1.74367e-10	-1.81707e-10	-1.8913e-10	-1.70333e-10
763	1.5617e-07	1.36815e-09	-1.64493e-10	-9.43325e-11	-1.62437e-10	4.75562e-10	3.11494e-07	1.15929e-09	7.91875e-11	-9.59088e-11	-1.79091e-10	-1.76227e-10	-1.85447e-10	-1.77871e-10
770	1.56162e-07	1.38298e-09	-1.51087e-10	-9.44997e-11	-1.69252e-10	4.72142e-10	3.1107e-07	1.1345e-09	7.68205e-11	-8.49121e-11	-1.7543e-10	-1.85029e-10	-1.75235e-10	-1.54574e-10
777	1.56134e-07	1.39776e-09	-1.4908e-10	-1.14091e-10	-1.60894e-10	4.39753e-10	3.11384e-07	1.13073e-09	8.18785e-11	-6.57708e-11	-1.75149e-10	-1.76143e-10	-1.89822e-10	-1.73227e-10
784	1.56173e-07	1.37479e-09	-1.75163e-10	-1.22697e-10	-1.64665e-10	4.47821e-10	3.1114e-07	1.12678e-09	5.18841e-11	-9.04804e-11	-1.73316e-10	-1.66448e-10	-1.83969e-10	-1.567e-10
791	1.56084e-07	1.41599e-09	-1.52183e-10	-1.22496e-10	-1.58456e-10	4.6396e-10	3.10898e-07	1.11979e-09	7.73812e-11	-8.24803e-11	-1.73729e-10	-1.79558e-10	-1.62885e-10	-1.73135e-10
798	1.5612e-07	1.41761e-09	-1.64613e-10	-1.12596e-10	-1.66145e-10	4.81028e-10	3.11224e-07	1.15505e-09	7.20515e-11	-9.84889e-11	-1.73132e-10	-1.81751e-10	-1.71645e-10	-1.68269e-10
805	1.56149e-07	1.39737e-09	-1.79004e-10	-9.65347e-11	-1.75652e-10	4.48162e-10	3.11186e-07	1.11138e-09	6.31415e-11	-7.0774e-11	-1.82393e-10	-1.7873e-10	-1.72638e-10	-1.85319e-10
812	1.56146e-07	1.40741e-09	-1.69874e-10	-1.06973e-10	-1.77022e-10	4.36794e-10	3.11366e-07	1.14036e-09	7.13063e-11	-8.95675e-11	-1.68613e-10	-1.74249e-10	-1.63553e-10	-1.81858e-10
819	1.56027e-07	1.38728e-09	-1.7009e-10	-1.06261e-10	-1.78052e-10	4.95077e-10	3.11111e-07	1.13597e-09	8.79803e-11	-8.64026e-11	-1.78948e-10	-1.75326e-10	-1.62227e-10	-1.81234e-10
826	1.56024e-07	1.38261e-09	-1.87014e-10	-1.21079e-10	-1.61391e-10	4.61512e-10	3.11113e-07	1.14145e-09	6.85106e-11	-6.26105e-11	-1.7795e-10	-1.82615e-10	-1.85654e-10	-1.68656e-10
833	1.56035e-07	1.41905e-09	-1.73179e-10	-1.1493e-10	-1.75782e-10	4.38554e-10	3.11145e-07	1.13419e-09	8.25217e-11	-7.4698e-11	-1.64862e-10	-1.56135e-10	-1.93024e-10	-1.74399e-10
840	1.56112e-07	1.3658e-09	-1.49941e-10	-1.293e-10	-1.58072e-10	4.44019e-10	3.11229e-07	1.11837e-09	8.95296e-11	-9.02236e-11	-1.57607e-10	-1.76234e-10	-1.61882e-10	-1.57238e-10
847	1.56067e-07	1.3602e-09	-1.64701e-10	-8.62458e-11	-1.57069e-10	4.50028e-10	3.11528e-07	1.12284e-09	9.04662e-11	-8.77872e-11	-1.73559e-10	-1.9369e-10	-1.68874e-10	-1.68046e-10
854	1.56058e-07	1.40112e-09	-1.75619e-10	-9.01173e-11	-1.70468e-10	4.51332e-10	3.11321e-07	1.12871e-09	9.5729e-11	-9.49405e-11	-1.73933e-10	-1.78761e-10	-1.87386e-10	-1.7054e-10
861	1.56132e-07	1.39709e-09	-1.78893e-10	-1.19356e-10	-1.58521e-10	4.49989e-10	3.11202e-07	1.13973e-09	7.35488e-11	-9.82853e-11	-1.61855e-10	-1.73233e-10	-1.73817e-10	-1.5967e-10
868	1.56046e-07	1.39429e-09	-1.80344e-10	-1.23225e-10	-1.5148e-10	4.69305e-10	3.11226e-07	1.14332e-09	7.03124e-11	-8.10995e-11	-1.76661e-10	-1.63135e-10	-1.83334e-10	-1.84764e-10
875	1.56092e-07	1.39787e-09	-1.78338e-10	-1.14623e-10	-1.8076e-10	4.62947e-10	3.11379e-07	1.13444e-09	6.62423e-11	-9.56605e-11	-1.47068e-10	-1.81519e-10	-1.72701e-10	-1.70925e-10
882	1.56053e-07	1.37136e-09	-1.5187e-10	-1.16782e-10	-1.78345e-10	4.41671e-10	3.11239e-07	1.1311e-09	7.29311e-11	-9.31935e-11	-1.86853e-10	-1.78576e-10	-1.73524e-10	-1.77298e-10
889	1.56021e-07	1.39582e-09	-1.53434e-10	-9.53113e-11	-1.78357e-10	4.35771e-10	3.11307e-07	1.1336e-09	9.33873e-11	-9.30501e-11	-1.76311e-10	-1.89995e-10	-1.78325e-10	-1.82635e-10
896	1.56047e-07	1.35704e-09	-1.77996e-10	-9.99765e-11	-1.63548e-10	4.48532e-10	3.10719e-07	1.12498e-09	6.37913e-11	-8.69751e-11	-1.70096e-10	-1.84031e-10	-1.55067e-10	-1.72651e-10
903	1.56059e-07	1.38832e-09	-1.83435e-10	-1.25404e-10	-1.65688e-10	4.18474e-10	3.113e-07	1.11733e-09	6.27835e-11	-8.88453e-11	-1.77976e-10	-1.76974e-10	-1.77419e-10	-1.79598e-10
910	1.56103e-07	1.39537e-09	-1.64056e-10	-1.22818e-10	-1.60844e-10	4.53671e-10	3.10808e-07	1.12569e-09	7.08561e-11	-8.59901e-11	-1.75764e-10	-1.69066e-10	-1.92329e-10	-1.63816e-10
917	1.56133e-07	1.37783e-09	-1.72805e-10	-1.09512e-10	-1.65323e-10	4.25358e-10	3.11624e-07	1.11996e-09	6.00927e-11	-7.9933e-11	-1.8117e-10	-1.68944e-10	-1.76949e-10	-1.64407e-10
924	1.56072e-07	1.3549e-09	-1.62711e-10	-1.28759e-10	-1.78344e-10	4.48442e-10	3.10664e-07	1.13778e-09	7.51317e-11	-8.1017e-11	-1.9046e-10	-1.71075e-10	-1.66607e-10	-1.93204e-10
931	1.56012e-07	1.38854e-09	-1.69734e-10	-1.16378e-10	-1.55464e-10	4.47508e-10	3.11264e-07	1.12397e-09	6.71873e-11	-7.97497e-11	-1.74656e-10	-1.71537e-10	-1.76155e-10	-1.78957e-10
938	1.56027e-07	1.40414e-09	-1.6905e-10	-1.26033e-10	-1.48314e-10	4.2196e-10	3.10794e-07	1.12349e-09	8.75243e-11	-9.20775e-11	-1.87999e-10	-1.68546e-10	-1.75743e-10	-1.83008e-10
945	1.55987e-07	1.36372e-09	-1.65457e-10	-9.4424e-11	-1.64698e-10	4.18282e-10	3.11339e-07	1.11598e-09	6.71848e-11	-8.52443e-11	-1.7294e-10	-1.85282e-10	-1.65481e-10	-1.75187e-10
952	1.56059e-07	1.39573e-09	-1.66701e-10	-1.161e-10	-1.52871e-10	4.5494e-10	3.11068e-07	1.09143e-09	5.88745e-11	-8.89107e-11	-1.78422e-10	-1.78242e-10	-1.75702e-10	-1.73139e-10
959	1.56032e-07	1.39811e-09	-1.68991e-10	-1.16762e-10	-1.78794e-10	4.22354e-10	3.1133e-07	1.09646e-09	5.88664e-11	-1.02899e-10	-1.80132e-10	-1.62752e-10	-1.74033e-10	-1.80651e-10
966	1.56013e-07	1.39764e-09	-1.71155e-10	-1.05529e-10	-1.77546e-10	4.41039e-10	3.11194e-07	1.10147e-09	6.2431e-11	-1.00262e-10	-1.68606e-10	-1.74569e-10	-1.72338e-10	-1.8377e-10
973	1.5611e-07	1.37101e-09	-1.85149e-10	-1.05832e-10	-1.74544e-10	4.28169e-10	3.1135e-07	1.13665e-09	6.64079e-11	-7.6726e-11	-1.76491e-10	-1.83922e-10	-1.83958e-10	-1.76159e-10
980	1.56127e-07	1.40078e-09	-1.66906e-10	-1.14766e-10	-1.86189e-10	4.29379e-10	3.10761e-07	1.14283e-09	7.06757e-11	-9.07152e-11	-1.74529e-10	-1.65923e-10	-1.74461e-10	-1.78312e-10
987	1.56107e-07	1.38776e-09	-1.62885e-10	-1.13879e-10	-1.65494e-10	4.32827e-10	3.11109e-07	1.13548e-09	4.82566e-11	-8.58276e-11	-1.64043e-10	-1.65799e-10	-1.86296e-10	-1.79186e-10
994	1.5606e-07	1.36567e-09	-1.78449e-10	-9.47426e-11	-1.72091e-10	3.92814e-10	3.10881e-07	1.12853e-09	6.5318e-11	-1.01613e-10	-1.64872e-10	-1.78431e-10	-1.65535e-10	-1.6579e-10
1001	1.56074e-07	1.35906e-09	-1.78607e-10	-1.41902e-10	-1.72456e-10	4.17672e-10	3.11442e-07	1.1051e-09	7.09848e-11	-1.00946e-10	-1.64278e-10	-1.72003e-10	-1.73654e-10	-1.87296e-10
1008	1.5599e-07	1.36625e-09	-1.72865e-10	-1.07819e-10	-1.6438e-10	3.97521e-10	3.10891e-07	1.12487e-09	7.2668e-11	-8.19443e-11	-1.67055e-10	-1.77387e-10	-1.80697e-10	-1.71823e-10
1015	1.56102e-07	1.37218e-09	-1.73167e-10	-1.17236e-10	-1.65502e-10	4.40015e-10	3.11251e-07	1.08517e-09	7.98375e-11	-7.1729e-11	-1.71835e-10	-1.75121e-10	-1.76872e-10	-1.67235e-10
1022	1.56046e-07	1.392e-09	-1.8267e-10	-1.20368e-10	-1.70093e-10	4.45062e-10	3.10656e-07	1.1126e-09	8.24489e-11	-8.23082e-11	-1.79179e-10	-1.74584e-10	-1.71554e-10	-1.66758e-10
1029	1.56023e-07	1.41524e-09	-1.71502e-10	-1.18746e-10	-1.71381e-10	4.28159e-10	3.11093e-07	1.10793e-09	5.24627e-11	-9.44914e-11	-1.62328e-10	-1.74685e-10	-1.77071e-10	-1.71726e-10
1036	1.56075e-07	1.39049e-09	-1.66048e-10	-1.12965e-10	-1.66641e-10	3.97979e-10	3.10916e-07	1.11972e-09	8.04583e-11	-8.52184e-11	-1.70637e-10	-1.73299e-10	-1.79194e-10	-1.69988e-10
1043	1.56053e-07	1.42262e-09	-1.47939e-10	-1.25918e-10	-1.85749e-10	4.32109e-10	3.10752e-07	1.10444e-09	7.24619e-11	-1.07747e-10	-1.87719e-10	-1.74284e-10	-1.64254e-10	-1.70614e-10
1050	1.55998e-07	1.38141e-09	-1.78798e-10	-1.06742e-10	-1.88853e-10	4.23664e-10	3.11317e-07	1.11556e-09	1.13342e-10	-8.49281e-11	-1.6258e-10	-1.8166e-10	-1.76458e-10	-1.59778e-10
1057	1.56092e-07	1.37509e-09	-1.66257e-10	-8.82365e-11	-1.58873e-10	4.35538e-10	3.10838e-07	1.1563e-09	5.89992e-11	-8.27113e-11	-1.78005e-10	-1.57018e-10	-1.8492e-10	-1.7808e-10
1064	1.55995e-07	1.40944e-09	-1.62412e-10	-1.10049e-10	-1.72039e-10	4.02204e-10	3.11244e-07	1.10123e-09	6.28326e-11	-9.33655e-11	-1.84005e-10	-1.76826e-10	-1.89352e-10	-1.85909e-10
1071	1.56029e-07	1.36637e-09	-1.69563e-10	-1.02158e-10	-1.76627e-10	4.10748e-10	3.11173e-07	1.12502e-09	7.27282e-11	-7.2934e-11	-1.82915e-10	-1.67317e-10	-1.63035e-10	-1.65924e-10
1078	1.5607e-07	1.3582e-09	-1.77483e-10	-1.03761e-10	-1.66873e-10	4.32212e-10	3.1081e-07	1.1291e-09	7.03165e-11	-8.4603e-11	-1.71972e-10	-1.85675e-10	-1.81435e-10	-1.79892e-10
1085	1.56003e-07	1.39646e-09	-1.68255e-10	-1.11072e-10	-1.49303e-10	4.06458e-10	3.10936e-07	1.0976e-09	1.00517e-10	-8.41172e-11	-1.86297e-10	-1.78363e-10	-1.99147e-10	-1.72464e-10
1092	1.5601e-07	1.3985e-09	-1.74379e-10	-1.03249e-10	-1.61673e-10	4.06083e-10	3.10513e-07	1.10941e-09	6.30502e-11	-7.59593e-11	-1.72208e-10	-1.66005e-10	-1.80867e-10	-1.87029e-10
1099	1.56082e-07	1.39237e-09	-1.64717e-10	-9.81153e-11	-1.7109e-10	4.34967e-10	3.11193e-07	1.12861e-09	6.5802e-11	-1.03162e-10	-1.80142e-10	-1.79727e-10	-1.76369e-10	-1.75876e-10
1106	1.56009e-07	1.39231e-09	-1.79771e-10	-9.67186e-11	-1.68847e-10	4.00441e-10	3.10741e-07	1.11687e-09	8.47648e-11	-1.0564e-10	-1.86495e-10	-1.80184e-10	-1.8258e-10	-1.87146e-10
1113	1.55991e-07	1.37746e-09	-1.65189e-10	-1.08191e-10	-1.74153e-10	3.91207e-10	3.1134e-07	1.09308e-09	8.53686e-11	-1.12542e-10	-1.68152e-10	-1.71465e-10	-1.83794e-10	-1.82043e-10
1120	1.55985e-07	1.41749e-09	-1.65789e-10	-1.03419e-10	-1.62816e-10	4.10039e-10	3.10706e-07	1.11299e-09	9.6959e-11	-8.30663e-11	-1.66641e-10	-1.81019e-10	-1.71492e-10	-1.69993e-10
1127	1.55953e-07	1.39389e-09	-1.742e-10	-1.23551e-10	-1.6519e-10	4.11951e-10	3.11443e-07	1.13564e-09	7.9691e-11	-9.46564e-11	-1.81105e-10	-1.63154e-10	-1.71691e-10	-1.63932e-10
1134	1.55992e-07	1.40981e-09	-1.57358e-10	-1.15845e-10	-1.5519e-10	4.19021e-10	3.10804e-07	1.09144e-09	7.63396e-11	-1.01022e-10	-1.72333e-10	-1.72147e-10	-1.71885e-10	-1.76557e-10
1141	1.56008e-07	1.41762e-09	-1.56688e-10	-1.08122e-10	-1.71808e-10	4.06919e-10	3.10801e-07	1.12323e-09	5.85347e-11	-1.05233e-10	-1.73741e-10	-1.6005e-10	-1.6837e-10	-1.75631e-10
1148	1.56063e-07	1.37029e-09	-1.65517e-10	-1.09222e-10	-1.73435e-10	3.90654e-10	3.10777e-07	1.15364e-09	6.9103e-11	-9.41999e-11	-1.82995e-10	-1.92333e-10	-1.86623e-10	-1.87428e-10
1155	1.56098e-07	1.36818e-09	-1.54973e-10	-1.13542e-10	-1.73471e-10	4.39875e-10	3.11266e-07	1.11799e-09	5.57412e-11	-8.43756e-11	-1.8211e-10	-1.64534e-10	-1.79664e-10	-1.67226e-10
1162	1.56052e-07	1.39596e-09	-1.80592e-10	-1.17946e-10	-1.54541e-10	4.1388e-10	3.1076e-07	1.12583e-09	5.82908e-11	-1.02146e-10	-1.8111e-10	-1.65873e-10	-1.76832e-10	-1.71583e-10
1169	1.56077e-07	1.39587e-09	-1.57223e-10	-1.33254e-10	-1.66727e-10	4.09477e-10	3.11077e-07	1.10094e-09	7.25443e-11	-8.59784e-11	-1.8034e-10	-1.82071e-10	-1.7666e-10	-1.90332e-10
1176	1.56024e-07	1.40399e-09	-1.72059e-10	-1.22657e-10	-1.64836e-10	4.30202e-10	3.1089e-07	1.10936e-09	7.36507e-11	-9.90712e-11	-1.6389e-10	-1.79954e-10	-1.73554e-10	-1.56448e-10
1183	1.56111e-07	1.39489e-09	-1.66602e-10	-1.14316e-10	-1.62048e-10	4.13817e-10	3.1111e-07	1.13179e-09	7.1855e-11	-7.70871e-11	-1.60963e-10	-1.72054e-10	-1.84572e-10	-1.72677e-10
1190	1.56073e-07	1.35706e-09	-1.65762e-10	-1.19838e-10	-1.74128e-10	3.92085e-10	3.1071e-07	1.09792e-09	8.06536e-11	-1.00452e-10	-1.81327e-10	-1.91895e-10	-1.73231e-10	-1.8267e-10
1197	1.56111e-07	1.36777e-09	-1.5673e-10	-1.12706e-10	-1.74098e-10	3.9764e-10	3.11051e-07	1.10418e-09	5.60667e-11	-1.02265e-10	-1.76875e-10	-1.78509e-10	-1.62239e-10	-1.72705e-10
1204	1.56137e-07	1.39013e-09	-1.78428e-10	-1.09132e-10	-1.78455e-10	4.33959e-10	3.11026e-07	1.1197e-09	8.22977e-11	-8.56423e-11	-1.81316e-10	-1.67971e-10	-1.8519e-10	-1.64439e-10
1211	1.56101e-07	1.38827e-09	-1.7434e-10	-1.00306e-10	-1.71748e-10	4.06851e-10	3.11033e-07	1.10761e-09	8.73555e-11	-9.89408e-11	-1.6494e-10	-1.7998e-10	-1.74693e-10	-1.92961e-10
1218	1.56113e-07	1.3645e-09	-1.61241e-10	-9.88722e-11	-1.75237e-10	4.15532e-10	3.10501e-07	1.11135e-09	8.20514e-11	-9.75002e-11	-1.63113e-10	-1.76157e-10	-1.74387e-10	-1.60614e-10
1225	1.5608e-07	1.37469e-09	-1.78341e-10	-1.17828e-10	-1.59227e-10	4.07308e-10	3.11303e-07	1.10565e-09	6.28321e-11	-8.8878e-11	-1.47838e-10	-1.7305e-10	-1.72436e-10	-1.69907e-10
1232	1.56039e-07	1.38884e-09	-1.70063e-10	-1.12719e-10	-1.6094e-10	4.09856e-10	3.11013e-07	1.11572e-09	6.19094e-11	-9.49136e-11	-1.75529e-10	-1.62118e-10	-1.79956e-10	-1.52524e-10
1239	1.56084e-07	1.39684e-09	-1.73776e-10	-1.14302e-10	-1.71498e-10	4.03278e-10	3.11252e-07	1.11771e-09	8.13617e-11	-8.43537e-11	-1.6731e-10	-1.86108e-10	-1.79605e-10	-1.83207e-10
1246	1.56099e-07	1.34955e-09	-1.68681e-10	-1.23819e-10	-1.60249e-10	4.18859e-10	3.10634e-07	1.13388e-09	4.22809e-11	-1.07721e-10	-1.74151e-10	-1.73937e-10	-1.83073e-10	-1.54227e-10
1253	1.56098e-07	1.36228e-09	-1.72838e-10	-8.45378e-11	-1.81597e-10	4.33217e-10	3.10986e-07	1.07565e-09	6.25604e-11	-9.77771e-11	-1.71691e-10	-1.75633e-10	-1.65483e-10	-1.81022e-10
1260	1.56127e-07	1.35672e-09	-1.74095e-10	-1.01914e-10	-1.69263e-10	4.12037e-10	3.10711e-07	1.11292e-09	6.95518e-11	-9.45556e-11	-1.75633e-10	-1.79113e-10	-1.47235e-10	-1.73449e-10
1267	1.56039e-07	1.39854e-09	-1.66914e-10	-1.21707e-10	-1.74903e-10	4.05332e-10	3.11239e-07	1.08595e-09	5.51644e-11	-8.49476e-11	-1.53253e-10	-1.82157e-10	-1.70842e-10	-1.77335e-10
1274	1.56114e-07	1.38386e-09	-1.61657e-10	-1.21895e-10	-1.5773e-10	3.82119e-10	3.10823e-07	1.11853e-09	7.44383e-11	-9.70986e-11	-1.80064e-10	-1.67595e-10	-1.86235e-10	-1.8045e-10
1281	1.56061e-07	1.39865e-09	-1.74077e-10	-1.20113e-10	-1.72111e-10	3.97208e-10	3.1128e-07	1.10716e-09	8.51863e-11	-8.75177e-11	-1.8164e-10	-1.6991e-10	-1.72245e-10	-1.75649e-10
1288	1.55984e-07	1.38591e-09	-1.51602e-10	-1.30602e-10	-1.60914e-10	4.23419e-10	3.1025e-07	1.11565e-09	8.47351e-11	-9.80702e-11	-1.72414e-10	-1.59971e-10	-1.6685e-10	-1.78403e-10
1295	1.56058e-07	1.36496e-09	-1.61098e-10	-9.98159e-11	-1.55286e-10	3.88898e-10	3.10963e-07	1.11947e-09	5.39211e-11	-7.62592e-11	-1.71572e-10	-1.631e-10	-1.76644e-10	-1.76333e-10
1302	1.56002e-07	1.37823e-09	-1.80315e-10	-1.18381e-10	-1.65152e-10	4.13897e-10	3.10881e-07	1.12829e-09	5.94971e-11	-9.25648e-11	-1.78492e-10	-1.79903e-10	-1.76283e-10	-1.64199e-10
1309	1.56006e-07	1.3612e-09	-1.64104e-10	-1.06636e-10	-1.6285e-10	4.03182e-10	3.10932e-07	1.10686e-09	6.30916e-11	-1.08222e-10	-1.56382e-10	-1.66244e-10	-1.87421e-10	-1.62172e-10
1316	1.56108e-07	1.4204e-09	-1.59944e-10	-1.05684e-10	-1.61203e-10	4.06159e-10	3.10838e-07	1.08618e-09	7.25643e-11	-7.11228e-11	-1.85619e-10	-1.48656e-10	-1.81856e-10	-1.56555e-10
1323	1.56132e-07	1.39373e-09	-1.72707e-10	-9.41655e-11	-1.67138e-10	3.89161e-10	3.10774e-07	1.09449e-09	9.32701e-11	-8.73638e-11	-1.73764e-10	-1.71974e-10	-1.78439e-10	-1.80532e-10
1330	1.56001e-07	1.40064e-09	-1.80028e-10	-1.21111e-10	-1.54397e-10	4.01945e-10	3.11258e-07	1.11752e-09	6.03136e-11	-1.01693e-10	-1.71581e-10	-1.81434e-10	-1.7577e-10	-1.66591e-10
1337	1.56007e-07	1.37618e-09	-1.6021e-10	-1.16219e-10	-1.77912e-10	4.05457e-10	3.10989e-07	1.11606e-09	7.57121e-11	-9.27484e-11	-1.729e-10	-1.75799e-10	-1.87593e-10	-1.72756e-10
1344	1.56049e-07	1.39538e-09	-1.7578e-10	-1.07721e-10	-1.79025e-10	4.29291e-10	3.10931e-07	1.10667e-09	6.32226e-11	-9.87961e-11	-1.76469e-10	-1.83956e-10	-1.59162e-10	-1.81192e-10
1351	1.56075e-07	1.37275e-09	-1.73179e-10	-1.06415e-10	-1.78246e-10	4.07215e-10	3.10943e-07	1.08961e-09	6.61728e-11	-9.62703e-11	-1.75551e-10	-1.67228e-10	-1.6456e-10	-1.7006e-10
1358	1.56045e-07	1.38892e-09	-1.55206e-10	-1.11946e-10	-1.56085e-10	4.10828e-10	3.10994e-07	1.12354e-09	8.44309e-11	-1.15517e-10	-1.76311e-10	-1.94884e-10	-1.81638e-10	-1.78447e-10
1365	1.56143e-07	1.41175e-09	-1.79901e-10	-1.15149e-10	-1.70277e-10	3.87968e-10	3.10801e-07	1.07957e-09	6.64018e-11	-9.61321e-11	-1.6184e-10	-1.73322e-10	-1.70367e-10	-1.80577e-10
1372	1.56109e-07	1.38002e-09	-1.70495e-10	-1.0705e-10	-1.50224e-10	3.9154e-10	3.10918e-07	1.13844e-09	6.46535e-11	-9.59278e-11	-1.82649e-10	-1.65629e-10	-1.63371e-10	-1.77646e-10
1379	1.56081e-07	1.37633e-09	-1.29064e-10	-1.1938e-10	-1.75905e-10	4.20253e-10	3.10814e-07	1.12059e-09	6.34077e-11	-9.43719e-11	-1.69626e-10	-1.5867e-10	-1.79888e-10	-1.72869e-10
1386	1.56029e-07	1.371e-09	-1.61735e-10	-1.13524e-10	-1.65621e-10	3.90437e-10	3.10876e-07	1.08682e-09	5.85116e-11	-9.82667e-11	-1.75898e-10	-1.77304e-10	-1.76991e-10	-1.72417e-10
1393	1.55981e-07	1.37316e-09	-1.49968e-10	-9.64332e-11	-1.44722e-10	4.04084e-10	3.10763e-07	1.08664e-09	7.88925e-11	-1.01177e-10	-1.65407e-10	-1.79901e-10	-1.68082e-10	-1.80007e-10
1400	1.56011e-07	1.38473e-09	-1.79136e-10	-1.2141e-10	-1.62695e-10	3.69861e-10	3.11003e-07	1.1093e-09	8.65661e-11	-1.15504e-10	-1.66227e-10	-1.74651e-10	-1.57358e-10	-1.80589e-10
1407	1.5592e-07	1.37837e-09	-1.74526e-10	-1.27012e-10	-1.53361e-10	3.91839e-10	3.10593e-07	1.11569e-09	1.03114e-10	-1.00254e-10	-1.62389e-10	-1.65021e-10	-1.83504e-10	-1.60748e-10
1414	1.55969e-07	1.42258e-09	-1.82053e-10	-1.0535e-10	-1.57395e-10	3.83564e-10	3.11138e-07	1.09507e-09	8.23929e-11	-1.09385e-10	-1.8264e-10	-1.80949e-10	-1.78367e-10	-1.77994e-10
1421	1.56006e-07	1.39052e-09	-1.6631e-10	-1.05303e-10	-1.78556e-10	3.86363e-10	3.10474e-07	1.12395e-09	7.90785e-11	-7.80251e-11	-1.68145e-10	-1.87014e-10	-1.76502e-10	-1.67501e-10
1428	1.55983e-07	1.36622e-09	-1.69698e-10	-9.73501e-11	-1.77517e-10	4.15085e-10	3.10724e-07	1.08827e-09	7.82761e-11	-1.01446e-10	-1.66423e-10	-1.83642e-10	-1.86971e-10	-1.72885e-10
1435	1.56011e-07	1.3963e-09	-1.63591e-10	-1.0739e-10	-1.66026e-10	3.93907e-10	3.1054e-07	1.10478e-09	6.47868e-11	-1.04913e-10	-1.6965e-10	-1.62939e-10	-1.83486e-10	-1.76075e-10
1442	1.56038e-07	1.37602e-09	-1.73962e-10	-1.09944e-10	-1.74894e-10	3.9422e-10	3.11084e-07	1.10534e-09	9.31299e-11	-9.42292e-11	-1.75228e-10	-1.84344e-10	-1.86569e-10	-1.7134e-10
1449	1.56012e-07	1.38163e-09	-1.70102e-10	-1.16773e-10	-1.55454e-10	3.80927e-10	3.10418e-07	1.10202e-09	6.01875e-11	-1.02e-10	-1.78794e-10	-1.88149e-10	-1.74735e-10	-1.81368e-10
1456	1.55999e-07	1.38329e-09	-1.75696e-10	-9.83204e-11	-1.71058e-10	3.71373e-10	3.11099e-07	1.08809e-09	7.89783e-11	-1.01935e-10	-1.89109e-10	-1.65682e-10	-1.66673e-10	-1.64207e-10
1463	1.56083e-07	1.36427e-09	-1.82892e-10	-1.00496e-10	-1.72667e-10	4.11987e-10	3.10652e-07	1.10655e-09	6.66556e-11	-1.05731e-10	-1.51581e-10	-1.78079e-10	-1.7699e-10	-1.77529e-10
1470	1.5604e-07	1.38414e-09	-1.63484e-10	-9.87875e-11	-1.69075e-10	3.86992e-10	3.1133e-07	1.10493e-09	6.16466e-11	-1.02988e-10	-1.81338e-10	-1.83504e-10	-1.62602e-10	-1.80054e-10
1477	1.55969e-07	1.37443e-09	-1.69634e-10	-1.07946e-10	-1.53485e-10	3.87863e-10	3.105e-07	1.10112e-09	6.43995e-11	-9.83136e-11	-1.79603e-10	-1.76035e-10	-1.72926e-10	-1.63424e-10
1484	1.56106e-07	1.40779e-09	-1.50534e-10	-1.01963e-10	-1.63785e-10	3.98567e-10	3.11006e-07	1.08231e-09	5.50526e-11	-9.20714e-11	-1.78679e-10	-1.8904e-10	-1.81937e-10	-1.69733e-10
1491	1.56006e-07	1.35408e-09	-1.73573e-10	-1.0768e-10	-1.73703e-10	4.1626e-10	3.10732e-07	1.08406e-09	7.59497e-11	-1.08432e-10	-1.77447e-10	-1.80601e-10	-1.73528e-10	-1.84294e-10
1498	1.55939e-07	1.39864e-09	-1.52403e-10	-9.59211e-11	-1.6977e-10	3.77401e-10	3.10941e-07	1.10176e-09	7.4828e-11	-8.2892e-11	-1.71247e-10	-1.67347e-10	-1.62985e-10	-1.82472e-10
1505	1.55926e-07	1.35091e-09	-1.84886e-10	-9.98081e-11	-1.62258e-10	3.87454e-10	3.10921e-07	1.09322e-09	5.08094e-11	-1.00196e-10	-1.74583e-10	-1.73649e-10	-1.73778e-10	-1.78124e-10
1512	1.5598e-07	1.38444e-09	-1.78018e-10	-1.16179e-10	-1.67099e-10	3.87559e-10	3.10636e-07	1.0796e-09	6.24211e-11	-9.24059e-11	-1.78313e-10	-1.81406e-10	-1.73802e-10	-1.71352e-10
1519	1.56111e-07	1.3753e-09	-1.70317e-10	-8.97674e-11	-1.64295e-10	3.83437e-10	3.11107e-07	1.09633e-09	3.96829e-11	-9.19312e-11	-1.81972e-10	-1.69582e-10	-1.90241e-10	-1.87853e-10
1526	1.56089e-07	1.39652e-09	-1.59727e-10	-1.07127e-10	-1.62498e-10	3.60562e-10	3.11188e-07	1.09744e-09	5.78188e-11	-9.44244e-11	-1.56785e-10	-1.65361e-10	-1.67999e-10	-1.83302e-10
1533	1.56001e-07	1.37406e-09	-1.85232e-10	-9.93094e-11	-1.50851e-10	3.5374e-10	3.10861e-07	1.09442e-09	8.0191e-11	-9.48317e-11	-1.72877e-10	-1.7946e-10	-1.81515e-10	-1.85047e-10
1540	1.55946e-07	1.40821e-09	-1.6872e-10	-1.25158e-10	-1.65334e-10	3.87662e-10	3.11073e-07	1.08829e-09	6.88278e-11	-9.20832e-11	-1.62764e-10	-1.80721e-10	-1.78372e-10	-1.78944e-10
1547	1.559e-07	1.38144e-09	-1.74401e-10	-1.12529e-10	-1.67823e-10	3.86661e-10	3.10608e-07	1.08377e-09	8.14265e-11	-8.90748e-11	-1.68748e-10	-1.61382e-10	-1.80054e-10	-1.75397e-10
1554	1.5596e-07	1.4041e-09	-1.53806e-10	-1.13694e-10	-1.80109e-10	3.82991e-10	3.10864e-07	1.0986e-09	5.83854e-11	-9.36473e-11	-1.68074e-10	-1.76408e-10	-1.78391e-10	-1.81397e-10
OAA_4 (total pressure = 0.024 bar, furnace T = 89.5 °C, initial reactor position = 6 mm)
Time (s)	Total signal intesity	m/z 2	m/z 12	m/z 14	m/z 15	m/z 18	m/z 40	m/z 28	m/z 32	m/z 44	m/z 33	m/z 34	m/z 48	m/z 64
0	1.56093e-07	1.57434e-09	-2.24687e-10	-1.70351e-10	-2.19994e-10	2.48485e-10	3.14442e-07	9.87964e-10	-4.90669e-12	-1.70258e-10	-2.24602e-10	-2.36616e-10	-2.04506e-10	-2.22492e-10
7	1.55644e-07	1.57042e-09	-1.97073e-10	-1.65944e-10	-2.25231e-10	2.69124e-10	3.14872e-07	9.70228e-10	1.67104e-11	-1.54815e-10	-2.25274e-10	-2.15188e-10	-2.44049e-10	-2.30521e-10
14	1.55728e-07	1.58284e-09	-2.2529e-10	-1.78329e-10	-2.1785e-10	2.54026e-10	3.14882e-07	9.70144e-10	-1.32239e-11	-1.72171e-10	-2.1818e-10	-2.158e-10	-2.19869e-10	-2.38329e-10
21	1.55658e-07	1.56627e-09	-2.37973e-10	-1.43035e-10	-2.30363e-10	2.95908e-10	3.14605e-07	9.50677e-10	3.89897e-12	-1.28808e-10	-2.26021e-10	-2.20834e-10	-2.30575e-10	-2.08901e-10
28	1.55691e-07	1.54966e-09	-2.29316e-10	-1.73526e-10	-2.23358e-10	2.73784e-10	3.14297e-07	9.67199e-10	-4.93335e-12	-1.76237e-10	-2.30223e-10	-2.37847e-10	-2.3837e-10	-2.24448e-10
35	1.5568e-07	1.55702e-09	-2.02568e-10	-1.87645e-10	-2.11089e-10	2.67574e-10	3.14966e-07	9.36408e-10	8.05551e-12	-1.64138e-10	-2.31297e-10	-2.24172e-10	-2.12516e-10	-2.38499e-10
42	1.55821e-07	1.57564e-09	-2.21564e-10	-1.6836e-10	-2.21937e-10	2.695e-10	3.1506e-07	9.75801e-10	-4.29692e-12	-1.81818e-10	-2.33317e-10	-2.18662e-10	-2.21451e-10	-2.26172e-10
49	1.56093e-07	3.4881e-09	-2.32328e-10	-1.66782e-10	-2.10123e-10	2.92089e-10	3.15379e-07	1.2177e-09	4.98099e-11	-1.25663e-10	-2.013e-10	-2.08098e-10	-2.11147e-10	-2.35574e-10
56	1.56018e-07	5.79445e-09	-2.08761e-10	-1.20168e-10	-2.31263e-10	3.44078e-10	3.1275e-07	2.81011e-09	2.56489e-10	3.35677e-10	-2.24691e-10	-2.23987e-10	-2.32899e-10	-2.2557e-10
63	1.55269e-07	6.80944e-09	-1.65724e-10	-2.11132e-11	-2.03476e-10	4.502e-10	3.10147e-07	4.58463e-09	3.9333e-10	1.42539e-09	-2.22072e-10	-2.26442e-10	-2.28871e-10	-2.18438e-10
70	1.54562e-07	7.09935e-09	-1.06829e-10	1.52416e-11	-2.24657e-10	5.86971e-10	3.06806e-07	5.59474e-09	4.63271e-10	2.58042e-09	-2.37465e-10	-2.32973e-10	-2.14872e-10	-2.30325e-10
77	1.54054e-07	7.10419e-09	-6.03465e-11	1.16779e-11	-2.03808e-10	6.77401e-10	3.05471e-07	6.18548e-09	5.26535e-10	3.26698e-09	-2.40779e-10	-2.11175e-10	-2.38497e-10	-2.32877e-10
84	1.53743e-07	6.84492e-09	-1.9947e-11	8.53347e-12	-2.45788e-10	8.04157e-10	3.04862e-07	6.47522e-09	4.9764e-10	3.5231e-09	-2.31795e-10	-2.36458e-10	-2.31637e-10	-2.19049e-10
91	1.53739e-07	6.56773e-09	-1.91305e-11	2.12458e-11	-2.24841e-10	8.52497e-10	3.04996e-07	6.43056e-09	4.5953e-10	3.52894e-09	-2.40597e-10	-2.26293e-10	-2.32322e-10	-2.39034e-10
98	1.53785e-07	6.2817e-09	-2.7205e-11	1.43538e-11	-2.3459e-10	9.01354e-10	3.05413e-07	6.23148e-09	4.70939e-10	3.36821e-09	-2.4212e-10	-2.24723e-10	-2.36852e-10	-2.27194e-10
105	1.53933e-07	6.04238e-09	-3.40788e-11	2.68728e-11	-2.32551e-10	9.35827e-10	3.06242e-07	5.99542e-09	4.405e-10	3.18321e-09	-2.131e-10	-2.34172e-10	-2.37356e-10	-2.24225e-10
112	1.54087e-07	5.75951e-09	-7.27747e-11	-1.48535e-11	-2.09834e-10	9.40525e-10	3.06484e-07	5.74319e-09	4.20616e-10	2.93486e-09	-2.42034e-10	-2.25902e-10	-2.22745e-10	-2.15735e-10
119	1.54165e-07	5.45178e-09	-4.09373e-11	-1.84275e-11	-2.00386e-10	9.68171e-10	3.07294e-07	5.47222e-09	3.76194e-10	2.75215e-09	-2.12664e-10	-2.30432e-10	-2.20931e-10	-2.41356e-10
126	1.54316e-07	5.23504e-09	-7.48922e-11	-3.209e-11	-2.29488e-10	9.42022e-10	3.08327e-07	5.14909e-09	3.60999e-10	2.53592e-09	-2.17372e-10	-2.06575e-10	-2.18562e-10	-2.17874e-10
133	1.55049e-07	5.03662e-09	-9.36293e-11	-2.2685e-11	-2.24511e-10	9.10398e-10	3.1027e-07	4.9482e-09	3.44673e-10	2.32738e-09	-2.32309e-10	-2.39983e-10	-2.17673e-10	-2.37943e-10
140	1.55831e-07	4.83626e-09	-8.65268e-11	-3.50552e-11	-2.23686e-10	9.07202e-10	3.11931e-07	4.64246e-09	3.25879e-10	2.17351e-09	-2.53044e-10	-2.38276e-10	-2.20135e-10	-2.3159e-10
147	1.56192e-07	4.63168e-09	-9.22948e-11	-5.38729e-11	-2.22164e-10	9.03366e-10	3.12039e-07	4.41278e-09	3.10083e-10	2.00977e-09	-2.38078e-10	-2.08497e-10	-2.29393e-10	-2.23349e-10
154	1.56328e-07	4.4299e-09	-1.1688e-10	-6.45339e-11	-2.15234e-10	8.8233e-10	3.13583e-07	4.23304e-09	2.74322e-10	1.83018e-09	-2.25975e-10	-2.23715e-10	-2.21425e-10	-2.31424e-10
161	1.56577e-07	4.26339e-09	-1.22743e-10	-4.86069e-11	-2.2927e-10	8.62876e-10	3.13522e-07	3.97997e-09	2.69875e-10	1.69628e-09	-2.25936e-10	-2.35405e-10	-2.20393e-10	-2.4015e-10
168	1.56615e-07	4.13772e-09	-1.23034e-10	-7.54674e-11	-2.3316e-10	8.63515e-10	3.1435e-07	3.83982e-09	2.53939e-10	1.5564e-09	-2.2348e-10	-2.15281e-10	-2.15958e-10	-2.20841e-10
175	1.56765e-07	3.96457e-09	-1.36377e-10	-6.60931e-11	-2.16736e-10	8.2769e-10	3.14185e-07	3.61771e-09	2.21899e-10	1.45388e-09	-2.32187e-10	-2.36354e-10	-2.28258e-10	-2.21136e-10
182	1.56791e-07	3.81731e-09	-1.47505e-10	-1.07994e-10	-2.30983e-10	8.48574e-10	3.15208e-07	3.44118e-09	2.24514e-10	1.35967e-09	-2.42497e-10	-2.17578e-10	-2.28995e-10	-2.06469e-10
189	1.56913e-07	3.63066e-09	-1.3362e-10	-1.01364e-10	-2.30071e-10	7.98169e-10	3.149e-07	3.32248e-09	2.27298e-10	1.21083e-09	-2.35719e-10	-2.30819e-10	-2.19114e-10	-2.35968e-10
196	1.57e-07	3.51371e-09	-1.71673e-10	-8.32351e-11	-2.1997e-10	8.20328e-10	3.1572e-07	3.11348e-09	1.96339e-10	1.11928e-09	-2.12299e-10	-2.12367e-10	-2.23176e-10	-2.28395e-10
203	1.56993e-07	3.36611e-09	-1.52518e-10	-1.12975e-10	-2.20701e-10	7.62969e-10	3.15421e-07	2.98553e-09	1.89826e-10	9.9058e-10	-2.16287e-10	-2.30563e-10	-2.11455e-10	-2.24145e-10
210	1.5635e-07	3.3067e-09	-1.64835e-10	-9.1894e-11	-2.17914e-10	7.3421e-10	3.14142e-07	2.86291e-09	1.66945e-10	9.19644e-10	-2.15662e-10	-2.35438e-10	-2.30263e-10	-2.35562e-10
217	1.55519e-07	3.14595e-09	-1.78569e-10	-9.35301e-11	-2.37432e-10	7.41104e-10	3.13349e-07	2.73754e-09	1.74436e-10	8.24007e-10	-2.26801e-10	-2.31729e-10	-2.34122e-10	-2.19581e-10
224	1.55378e-07	3.04175e-09	-1.66414e-10	-1.24582e-10	-2.38899e-10	7.49326e-10	3.1312e-07	2.57537e-09	1.52202e-10	7.6128e-10	-2.32951e-10	-2.1093e-10	-2.08568e-10	-2.42539e-10
231	1.55267e-07	2.95077e-09	-1.84683e-10	-1.12081e-10	-2.1374e-10	6.89478e-10	3.1336e-07	2.50533e-09	1.35754e-10	7.08638e-10	-2.32423e-10	-2.26445e-10	-2.51405e-10	-2.24748e-10
238	1.55336e-07	2.84074e-09	-1.96024e-10	-1.3637e-10	-2.22546e-10	7.0064e-10	3.13355e-07	2.39488e-09	1.55866e-10	6.33515e-10	-2.36074e-10	-2.20805e-10	-2.25174e-10	-2.35085e-10
245	1.55344e-07	2.80357e-09	-1.70955e-10	-1.16394e-10	-2.40739e-10	6.98477e-10	3.13663e-07	2.32358e-09	1.14773e-10	5.66208e-10	-2.26051e-10	-2.21193e-10	-2.37445e-10	-2.28719e-10
252	1.55435e-07	2.73438e-09	-1.7089e-10	-1.3951e-10	-2.24009e-10	6.81425e-10	3.13781e-07	2.20066e-09	1.34411e-10	5.14783e-10	-2.25212e-10	-2.27228e-10	-2.34229e-10	-2.41073e-10
259	1.55424e-07	2.66327e-09	-1.83996e-10	-1.32891e-10	-2.30374e-10	6.43878e-10	3.14096e-07	2.13866e-09	9.66554e-11	4.79464e-10	-2.38627e-10	-2.36931e-10	-2.40072e-10	-2.37784e-10
266	1.55521e-07	2.60767e-09	-1.79386e-10	-1.10742e-10	-2.25809e-10	6.46399e-10	3.14486e-07	2.05654e-09	1.33543e-10	4.41638e-10	-2.33716e-10	-2.32917e-10	-2.45528e-10	-2.4611e-10
273	1.55505e-07	2.53335e-09	-1.87871e-10	-1.29405e-10	-2.2513e-10	6.35602e-10	3.14186e-07	2.01083e-09	7.46293e-11	3.95215e-10	-2.19831e-10	-2.16381e-10	-2.35007e-10	-2.29199e-10
280	1.55573e-07	2.45679e-09	-1.94116e-10	-1.29591e-10	-2.18163e-10	6.28641e-10	3.14525e-07	1.95529e-09	8.5961e-11	3.54298e-10	-2.3217e-10	-2.08724e-10	-2.49816e-10	-2.26096e-10
287	1.55492e-07	2.38039e-09	-2.02307e-10	-1.47341e-10	-2.26168e-10	6.20322e-10	3.14565e-07	1.88661e-09	7.68828e-11	3.31811e-10	-2.24478e-10	-2.23261e-10	-2.30773e-10	-2.19781e-10
294	1.55575e-07	2.37248e-09	-2.02998e-10	-1.39853e-10	-2.1948e-10	6.19608e-10	3.14963e-07	1.86052e-09	6.99004e-11	2.82053e-10	-2.19456e-10	-2.34867e-10	-2.3792e-10	-2.47812e-10
301	1.55556e-07	2.34392e-09	-1.87986e-10	-1.2539e-10	-2.22176e-10	5.85332e-10	3.14453e-07	1.82756e-09	5.57203e-11	2.45647e-10	-2.25331e-10	-2.32308e-10	-2.46842e-10	-2.20451e-10
308	1.55637e-07	2.31053e-09	-2.15825e-10	-1.55641e-10	-2.34487e-10	5.87212e-10	3.15267e-07	1.74887e-09	8.73997e-11	2.27549e-10	-2.35661e-10	-2.25704e-10	-2.33866e-10	-2.32055e-10
315	1.55602e-07	2.19994e-09	-1.97058e-10	-1.41707e-10	-2.25653e-10	5.55418e-10	3.15262e-07	1.71739e-09	9.94221e-11	1.88744e-10	-2.12061e-10	-2.37408e-10	-2.27449e-10	-2.3102e-10
322	1.55679e-07	2.19937e-09	-2.13833e-10	-1.46057e-10	-2.35169e-10	5.51583e-10	3.15331e-07	1.67452e-09	7.82513e-11	1.71623e-10	-2.23387e-10	-2.24696e-10	-2.25231e-10	-2.24946e-10
329	1.55634e-07	2.14613e-09	-2.0207e-10	-1.38009e-10	-2.14187e-10	5.43842e-10	3.15026e-07	1.66682e-09	5.0477e-11	1.3847e-10	-2.25262e-10	-2.23566e-10	-2.23094e-10	-2.13465e-10
336	1.55679e-07	2.15581e-09	-2.04514e-10	-1.55197e-10	-2.29009e-10	5.26474e-10	3.15624e-07	1.57613e-09	5.73029e-11	1.3226e-10	-2.21669e-10	-2.35232e-10	-2.43174e-10	-2.26443e-10
343	1.55668e-07	2.12419e-09	-1.96902e-10	-1.61588e-10	-2.35069e-10	5.29355e-10	3.15385e-07	1.54411e-09	7.19084e-11	9.44338e-11	-2.33143e-10	-2.27689e-10	-2.33604e-10	-2.36014e-10
350	1.55752e-07	2.09043e-09	-2.05255e-10	-1.55197e-10	-2.24096e-10	5.45495e-10	3.1505e-07	1.52086e-09	4.56057e-11	8.85643e-11	-2.34341e-10	-2.22508e-10	-2.30899e-10	-2.30031e-10
357	1.55712e-07	2.04346e-09	-2.18433e-10	-1.50774e-10	-2.1012e-10	5.06529e-10	3.15913e-07	1.5195e-09	6.55661e-11	7.8373e-11	-2.21489e-10	-2.16088e-10	-2.49194e-10	-2.38408e-10
364	1.55834e-07	2.02358e-09	-2.18775e-10	-1.59777e-10	-2.2651e-10	5.28295e-10	3.1511e-07	1.4758e-09	5.80485e-11	8.18193e-11	-2.34686e-10	-2.32346e-10	-2.23657e-10	-2.47302e-10
371	1.55806e-07	1.98875e-09	-2.02153e-10	-1.51795e-10	-2.28685e-10	5.18058e-10	3.15826e-07	1.44902e-09	5.9468e-11	4.59187e-11	-2.17051e-10	-2.19331e-10	-2.04344e-10	-2.22645e-10
378	1.55775e-07	1.96948e-09	-1.96865e-10	-1.52092e-10	-2.16913e-10	5.00045e-10	3.15589e-07	1.44926e-09	6.31571e-11	2.69409e-11	-2.37815e-10	-2.2881e-10	-2.20962e-10	-2.22352e-10
385	1.55745e-07	1.97476e-09	-2.34603e-10	-1.59997e-10	-2.367e-10	5.07095e-10	3.15773e-07	1.4188e-09	7.41695e-11	1.95222e-11	-2.25775e-10	-2.31849e-10	-2.2707e-10	-2.29429e-10
392	1.55724e-07	1.9171e-09	-2.16834e-10	-1.57466e-10	-2.13152e-10	4.64979e-10	3.15792e-07	1.42175e-09	6.48442e-11	9.75015e-12	-2.34185e-10	-2.28322e-10	-2.22322e-10	-2.24706e-10
399	1.55824e-07	1.90071e-09	-2.08434e-10	-1.57612e-10	-2.20415e-10	5.17501e-10	3.15962e-07	1.36866e-09	3.38271e-11	-2.13407e-12	-2.16421e-10	-2.15366e-10	-2.479e-10	-2.25517e-10
406	1.5577e-07	1.89272e-09	-1.94187e-10	-1.58458e-10	-2.13321e-10	4.68683e-10	3.15728e-07	1.39958e-09	3.2303e-11	8.38578e-12	-2.33568e-10	-2.27854e-10	-2.30367e-10	-2.31524e-10
413	1.55804e-07	1.84948e-09	-1.92279e-10	-1.30869e-10	-2.03705e-10	4.94551e-10	3.16292e-07	1.35868e-09	4.20238e-11	-3.08956e-11	-2.11589e-10	-2.2745e-10	-2.47844e-10	-2.36089e-10
420	1.5584e-07	1.87683e-09	-2.16014e-10	-1.35661e-10	-2.26843e-10	4.97844e-10	3.15706e-07	1.33961e-09	5.41154e-11	-6.82745e-12	-2.31195e-10	-2.16847e-10	-2.32676e-10	-2.54127e-10
427	1.55721e-07	1.87833e-09	-2.05211e-10	-1.6368e-10	-2.13712e-10	4.91438e-10	3.15358e-07	1.3059e-09	4.82824e-11	-2.78639e-11	-2.25172e-10	-2.39405e-10	-2.33033e-10	-2.43251e-10
434	1.55795e-07	1.8416e-09	-2.18537e-10	-1.59061e-10	-2.21289e-10	4.3122e-10	3.16073e-07	1.30887e-09	5.65944e-11	-6.46679e-11	-2.28384e-10	-2.34829e-10	-2.293e-10	-2.15699e-10
441	1.55791e-07	1.79733e-09	-2.09893e-10	-1.4875e-10	-2.24469e-10	4.40016e-10	3.15993e-07	1.30264e-09	3.04023e-11	-6.1982e-11	-2.37681e-10	-2.29429e-10	-2.28977e-10	-2.28387e-10
448	1.55825e-07	1.81588e-09	-2.15312e-10	-1.66897e-10	-2.20701e-10	4.8703e-10	3.15878e-07	1.3047e-09	6.72511e-11	-5.58559e-11	-2.2896e-10	-2.40274e-10	-2.29881e-10	-2.34831e-10
455	1.55768e-07	1.83924e-09	-2.21707e-10	-1.74136e-10	-2.20676e-10	4.46524e-10	3.16331e-07	1.28215e-09	4.28338e-11	-6.24286e-11	-2.46839e-10	-2.21846e-10	-2.37487e-10	-2.28233e-10
462	1.55858e-07	1.83762e-09	-2.24328e-10	-1.44099e-10	-2.40482e-10	4.74572e-10	3.15618e-07	1.29103e-09	4.48804e-11	-6.70889e-11	-2.26309e-10	-2.18159e-10	-2.29495e-10	-2.29438e-10
469	1.55854e-07	1.77507e-09	-2.29505e-10	-1.59738e-10	-2.17775e-10	4.34349e-10	3.16373e-07	1.24708e-09	4.37283e-11	-6.30783e-11	-2.37856e-10	-2.20505e-10	-2.2828e-10	-2.16871e-10
476	1.55867e-07	1.80943e-09	-2.15314e-10	-1.59239e-10	-2.10801e-10	4.35698e-10	3.16084e-07	1.28241e-09	5.19249e-11	-7.45218e-11	-2.26674e-10	-2.33894e-10	-2.38686e-10	-2.25791e-10
483	1.55891e-07	1.73601e-09	-2.12791e-10	-1.50474e-10	-2.33462e-10	4.2478e-10	3.16558e-07	1.25942e-09	4.01758e-11	-8.43818e-11	-2.12867e-10	-2.23852e-10	-2.18581e-10	-2.38825e-10
490	1.55929e-07	1.76577e-09	-1.95526e-10	-1.5791e-10	-2.32763e-10	4.28128e-10	3.16074e-07	1.24915e-09	4.30159e-11	-7.87074e-11	-2.1369e-10	-2.30774e-10	-2.41151e-10	-2.17241e-10
497	1.55928e-07	1.79006e-09	-2.19414e-10	-1.50535e-10	-2.24788e-10	4.43226e-10	3.16613e-07	1.25138e-09	1.85212e-11	-9.00981e-11	-2.40043e-10	-2.26272e-10	-2.40769e-10	-2.36357e-10
504	1.55895e-07	1.74959e-09	-2.22393e-10	-1.61385e-10	-2.4458e-10	4.35905e-10	3.16158e-07	1.24203e-09	4.20216e-11	-9.90371e-11	-2.29086e-10	-2.30184e-10	-2.46605e-10	-2.33446e-10
511	1.55866e-07	1.7517e-09	-2.26795e-10	-1.62023e-10	-2.18091e-10	4.31946e-10	3.16512e-07	1.23139e-09	1.44546e-11	-7.72949e-11	-2.06412e-10	-2.34521e-10	-2.23225e-10	-2.28525e-10
518	1.55976e-07	1.75915e-09	-2.26689e-10	-1.47475e-10	-2.29283e-10	4.16089e-10	3.15991e-07	1.21983e-09	4.07648e-11	-9.5837e-11	-2.19156e-10	-2.17255e-10	-2.08347e-10	-2.37045e-10
525	1.5593e-07	1.72414e-09	-2.26815e-10	-1.59773e-10	-2.32082e-10	4.23896e-10	3.16393e-07	1.22018e-09	4.20184e-11	-9.35914e-11	-2.33953e-10	-2.28325e-10	-2.1756e-10	-2.3418e-10
532	1.55942e-07	1.71857e-09	-2.24824e-10	-1.68219e-10	-2.05932e-10	4.25823e-10	3.16634e-07	1.24918e-09	1.81682e-11	-1.12248e-10	-2.29114e-10	-2.46385e-10	-2.39984e-10	-2.23677e-10
539	1.55967e-07	1.72777e-09	-2.24899e-10	-1.83666e-10	-2.23497e-10	4.06975e-10	3.15689e-07	1.19047e-09	1.60938e-11	-9.37189e-11	-2.48766e-10	-2.10256e-10	-2.44579e-10	-2.29748e-10
546	1.56001e-07	1.73718e-09	-2.17649e-10	-1.5871e-10	-2.29372e-10	4.19721e-10	3.16326e-07	1.1898e-09	2.37358e-11	-1.03397e-10	-2.26411e-10	-2.38728e-10	-2.13428e-10	-2.01886e-10
553	1.56091e-07	1.7312e-09	-2.21111e-10	-1.63452e-10	-2.19223e-10	4.10429e-10	3.1601e-07	1.22666e-09	4.19675e-11	-8.60926e-11	-2.16467e-10	-2.14625e-10	-2.26097e-10	-2.42908e-10
560	1.56016e-07	1.71454e-09	-2.18399e-10	-1.43524e-10	-2.29461e-10	4.00286e-10	3.16795e-07	1.18522e-09	2.36616e-11	-1.11857e-10	-2.32264e-10	-2.28571e-10	-2.10803e-10	-2.23336e-10
567	1.56003e-07	1.70144e-09	-2.14092e-10	-1.74227e-10	-2.23219e-10	4.1611e-10	3.16252e-07	1.16936e-09	-1.52726e-11	-1.19982e-10	-2.36995e-10	-2.20684e-10	-2.21146e-10	-2.4584e-10
574	1.5608e-07	1.72685e-09	-2.19155e-10	-1.65292e-10	-2.08366e-10	4.04573e-10	3.16708e-07	1.16808e-09	4.42785e-11	-1.05847e-10	-2.31022e-10	-2.15447e-10	-2.21471e-10	-2.47867e-10
581	1.56034e-07	1.67941e-09	-2.18161e-10	-1.69962e-10	-2.35457e-10	4.18136e-10	3.16102e-07	1.18995e-09	2.25388e-11	-1.22804e-10	-2.36468e-10	-2.22623e-10	-2.28988e-10	-2.32049e-10
588	1.55994e-07	1.71687e-09	-2.23568e-10	-1.69674e-10	-2.16718e-10	3.90839e-10	3.16382e-07	1.18178e-09	1.53284e-11	-9.76603e-11	-2.29016e-10	-2.24042e-10	-2.29725e-10	-2.30995e-10
595	1.56013e-07	1.67639e-09	-2.18419e-10	-1.51869e-10	-2.20607e-10	3.7969e-10	3.16235e-07	1.16893e-09	1.63135e-11	-1.23612e-10	-2.45082e-10	-2.23334e-10	-2.39866e-10	-2.35544e-10
602	1.56015e-07	1.66544e-09	-2.12598e-10	-1.58117e-10	-2.34765e-10	4.01905e-10	3.16482e-07	1.19734e-09	2.94456e-11	-1.05082e-10	-2.3071e-10	-2.25331e-10	-2.30457e-10	-2.33814e-10
609	1.55954e-07	1.67979e-09	-1.95926e-10	-1.82626e-10	-2.20573e-10	3.86699e-10	3.1609e-07	1.17331e-09	2.33273e-11	-1.40198e-10	-2.23251e-10	-2.41333e-10	-2.37621e-10	-2.26694e-10
616	1.56024e-07	1.66874e-09	-2.15166e-10	-1.49977e-10	-2.25832e-10	4.21993e-10	3.16024e-07	1.18758e-09	-1.54706e-11	-1.02582e-10	-2.3608e-10	-2.13611e-10	-2.33936e-10	-2.24351e-10
623	1.55981e-07	1.65225e-09	-2.20786e-10	-1.58259e-10	-2.30489e-10	3.69297e-10	3.1623e-07	1.15212e-09	1.87287e-11	-1.21584e-10	-2.35303e-10	-2.35566e-10	-2.309e-10	-2.18132e-10
630	1.55975e-07	1.67243e-09	-2.10412e-10	-1.64245e-10	-2.15387e-10	3.69002e-10	3.16324e-07	1.19902e-09	3.83782e-11	-1.21743e-10	-2.2776e-10	-2.24249e-10	-2.25518e-10	-2.38478e-10
637	1.55989e-07	1.69937e-09	-2.14823e-10	-1.7195e-10	-2.07413e-10	4.14383e-10	3.16172e-07	1.18109e-09	1.8002e-11	-1.23158e-10	-2.23904e-10	-2.2066e-10	-2.4005e-10	-2.37866e-10
644	1.56065e-07	1.68801e-09	-2.20234e-10	-1.57906e-10	-2.16665e-10	3.82346e-10	3.16048e-07	1.14775e-09	2.84779e-11	-1.24085e-10	-2.30642e-10	-2.39534e-10	-2.39e-10	-2.26292e-10
651	1.55976e-07	1.64061e-09	-2.26835e-10	-1.62215e-10	-2.34537e-10	3.89021e-10	3.16631e-07	1.14238e-09	1.66529e-11	-1.45064e-10	-2.27141e-10	-2.26593e-10	-2.29782e-10	-2.35651e-10
658	1.56057e-07	1.66216e-09	-2.2557e-10	-1.43971e-10	-2.25503e-10	4.02506e-10	3.16163e-07	1.17572e-09	3.70131e-11	-1.42453e-10	-2.37192e-10	-2.40968e-10	-2.2191e-10	-2.30582e-10
665	1.56036e-07	1.68994e-09	-2.16103e-10	-1.71305e-10	-2.18549e-10	3.71101e-10	3.16325e-07	1.13387e-09	3.46777e-11	-1.23444e-10	-2.30936e-10	-2.41709e-10	-2.3458e-10	-2.41305e-10
672	1.56009e-07	1.6784e-09	-2.26427e-10	-1.71087e-10	-2.34517e-10	3.77108e-10	3.15911e-07	1.13861e-09	9.55663e-12	-1.19584e-10	-2.25483e-10	-2.37516e-10	-1.9946e-10	-2.35669e-10
679	1.56035e-07	1.65942e-09	-2.31739e-10	-1.69829e-10	-2.0366e-10	3.66308e-10	3.16412e-07	1.16842e-09	1.65656e-11	-1.39496e-10	-2.34102e-10	-2.4018e-10	-2.45236e-10	-2.30895e-10
686	1.56072e-07	1.64109e-09	-2.0708e-10	-1.57214e-10	-2.15002e-10	3.8732e-10	3.16059e-07	1.14084e-09	3.25365e-11	-1.41987e-10	-2.33106e-10	-2.2492e-10	-1.93737e-10	-2.42019e-10
693	1.56023e-07	1.63932e-09	-2.4529e-10	-1.5074e-10	-2.14177e-10	3.79779e-10	3.16826e-07	1.14608e-09	1.2569e-11	-1.26279e-10	-2.31406e-10	-2.31143e-10	-2.2534e-10	-2.21035e-10
700	1.56048e-07	1.68754e-09	-2.11113e-10	-1.67582e-10	-2.14817e-10	3.80185e-10	3.16216e-07	1.13127e-09	1.40782e-11	-1.23571e-10	-2.45854e-10	-2.33668e-10	-2.20015e-10	-2.43239e-10
707	1.55993e-07	1.67087e-09	-2.22257e-10	-1.54241e-10	-2.30586e-10	3.67595e-10	3.16857e-07	1.17193e-09	1.62857e-11	-1.2024e-10	-2.40646e-10	-2.383e-10	-2.30453e-10	-2.20987e-10
714	1.56028e-07	1.66721e-09	-2.14288e-10	-1.59952e-10	-2.30737e-10	3.60268e-10	3.16545e-07	1.16952e-09	5.42787e-12	-1.30156e-10	-2.24544e-10	-2.33683e-10	-2.39712e-10	-2.28366e-10
721	1.56054e-07	1.6222e-09	-2.22788e-10	-1.62688e-10	-2.30493e-10	3.61181e-10	3.16696e-07	1.15603e-09	5.14104e-12	-1.4272e-10	-2.14576e-10	-2.08538e-10	-2.43767e-10	-2.22339e-10
728	1.56e-07	1.65819e-09	-2.32261e-10	-1.49553e-10	-2.05911e-10	3.6717e-10	3.16164e-07	1.1436e-09	1.55673e-11	-1.37225e-10	-2.36157e-10	-2.26701e-10	-2.38289e-10	-2.35121e-10
735	1.5602e-07	1.64614e-09	-2.19104e-10	-1.7899e-10	-2.19869e-10	3.68736e-10	3.16812e-07	1.12825e-09	2.67875e-11	-1.47435e-10	-2.28863e-10	-2.20275e-10	-2.27455e-10	-2.26538e-10
742	1.56031e-07	1.63843e-09	-2.04608e-10	-1.74381e-10	-2.12793e-10	3.52425e-10	3.16515e-07	1.13352e-09	2.19236e-11	-1.51875e-10	-2.31417e-10	-2.14182e-10	-2.29007e-10	-2.25113e-10
749	1.56078e-07	1.63606e-09	-2.25354e-10	-1.69737e-10	-2.14558e-10	3.90277e-10	3.16872e-07	1.13994e-09	1.28163e-11	-1.33308e-10	-2.31222e-10	-2.15928e-10	-2.28468e-10	-2.26034e-10
756	1.56086e-07	1.6344e-09	-2.34995e-10	-1.78562e-10	-2.11096e-10	3.75661e-10	3.16641e-07	1.12548e-09	-3.5526e-12	-1.28115e-10	-2.33758e-10	-2.31664e-10	-2.27179e-10	-2.28148e-10
763	1.56138e-07	1.64253e-09	-2.41348e-10	-1.65129e-10	-2.31571e-10	3.67345e-10	3.16815e-07	1.12949e-09	3.02501e-11	-1.46033e-10	-2.42603e-10	-2.31252e-10	-2.1317e-10	-2.37599e-10
770	1.56115e-07	1.65548e-09	-2.29872e-10	-1.57221e-10	-2.16736e-10	3.63605e-10	3.16465e-07	1.11468e-09	1.4684e-11	-1.45922e-10	-2.06023e-10	-2.27205e-10	-2.29175e-10	-2.19649e-10
777	1.56113e-07	1.66154e-09	-2.36476e-10	-1.40516e-10	-2.38747e-10	3.54798e-10	3.16612e-07	1.14455e-09	-6.1095e-12	-1.33325e-10	-2.46032e-10	-2.32312e-10	-2.26062e-10	-2.42032e-10
784	1.56094e-07	1.64892e-09	-2.22896e-10	-1.46543e-10	-2.27662e-10	3.70798e-10	3.16512e-07	1.1396e-09	3.2798e-11	-1.4471e-10	-2.41139e-10	-2.31005e-10	-2.45443e-10	-2.26607e-10
791	1.56047e-07	1.65153e-09	-2.31077e-10	-1.44677e-10	-2.33257e-10	3.74832e-10	3.16173e-07	1.12972e-09	1.7576e-11	-1.53634e-10	-2.27288e-10	-2.2288e-10	-2.40134e-10	-2.3982e-10
798	1.56147e-07	1.6468e-09	-2.36984e-10	-1.40114e-10	-2.25137e-10	3.67683e-10	3.16984e-07	1.14349e-09	4.16105e-11	-1.32048e-10	-2.4484e-10	-2.23609e-10	-2.3161e-10	-2.21319e-10
805	1.5614e-07	1.64841e-09	-2.14368e-10	-1.48348e-10	-2.13262e-10	3.71819e-10	3.16284e-07	1.1193e-09	3.17094e-11	-1.37289e-10	-2.2649e-10	-2.15932e-10	-2.3691e-10	-2.31736e-10
812	1.56091e-07	1.6098e-09	-2.35203e-10	-1.65204e-10	-2.14075e-10	3.3848e-10	3.16508e-07	1.11464e-09	2.19043e-12	-1.28542e-10	-2.10773e-10	-2.4512e-10	-2.24402e-10	-2.36905e-10
819	1.56054e-07	1.63813e-09	-2.29026e-10	-1.82094e-10	-2.32097e-10	3.67718e-10	3.15968e-07	1.07723e-09	-4.24756e-13	-1.44866e-10	-2.29679e-10	-2.32e-10	-2.13729e-10	-2.21832e-10
826	1.56073e-07	1.66825e-09	-2.16928e-10	-1.62041e-10	-2.26101e-10	3.72592e-10	3.16887e-07	1.09692e-09	3.43155e-11	-1.47743e-10	-2.40128e-10	-2.28268e-10	-2.26711e-10	-2.27669e-10
833	1.5607e-07	1.63306e-09	-2.25238e-10	-1.71625e-10	-2.34698e-10	3.695e-10	3.16562e-07	1.13839e-09	4.2488e-11	-1.52379e-10	-2.15613e-10	-2.29146e-10	-2.25751e-10	-2.41391e-10
840	1.56061e-07	1.63106e-09	-2.39125e-10	-1.75021e-10	-2.3085e-10	3.30921e-10	3.16586e-07	1.1405e-09	2.79877e-11	-1.40555e-10	-2.20509e-10	-2.35171e-10	-2.37947e-10	-2.23223e-10
847	1.56051e-07	1.61364e-09	-2.02626e-10	-1.47466e-10	-2.32847e-10	3.52781e-10	3.16498e-07	1.10671e-09	2.84617e-11	-1.40915e-10	-2.25514e-10	-2.29568e-10	-2.39515e-10	-2.24107e-10
854	1.56075e-07	1.62362e-09	-2.1533e-10	-1.48295e-10	-2.21614e-10	3.53123e-10	3.16571e-07	1.12536e-09	3.01395e-11	-1.65805e-10	-2.44207e-10	-2.36612e-10	-2.38326e-10	-2.20599e-10
861	1.56104e-07	1.63527e-09	-2.40625e-10	-1.42068e-10	-2.40292e-10	3.43864e-10	3.16796e-07	1.0867e-09	3.70094e-11	-1.24807e-10	-2.24864e-10	-2.05725e-10	-2.3163e-10	-2.16367e-10
868	1.56085e-07	1.62627e-09	-2.27823e-10	-1.74732e-10	-2.31371e-10	3.46767e-10	3.16619e-07	1.11641e-09	2.61478e-11	-1.3419e-10	-2.35415e-10	-2.28238e-10	-2.45841e-10	-2.4618e-10
875	1.56036e-07	1.62558e-09	-2.34028e-10	-1.50855e-10	-2.22039e-10	3.71108e-10	3.16931e-07	1.13148e-09	-4.11779e-12	-1.4851e-10	-2.36263e-10	-2.23032e-10	-2.33162e-10	-2.40065e-10
882	1.56012e-07	1.62242e-09	-2.04175e-10	-1.57012e-10	-2.27478e-10	3.63525e-10	3.16298e-07	1.11648e-09	-2.82882e-12	-1.36878e-10	-2.30512e-10	-2.04213e-10	-2.30799e-10	-2.48039e-10
889	1.56014e-07	1.66967e-09	-2.15995e-10	-1.58534e-10	-2.13547e-10	3.39191e-10	3.16698e-07	1.12555e-09	2.51614e-11	-1.33686e-10	-2.30805e-10	-2.08481e-10	-2.30259e-10	-2.39217e-10
896	1.56116e-07	1.60511e-09	-2.29e-10	-1.51886e-10	-2.1086e-10	3.37323e-10	3.16576e-07	1.10517e-09	8.82682e-12	-1.31277e-10	-2.26926e-10	-2.34286e-10	-2.12398e-10	-2.14032e-10
903	1.56089e-07	1.62095e-09	-2.31917e-10	-1.65872e-10	-2.24446e-10	3.52391e-10	3.16812e-07	1.07638e-09	2.45667e-11	-1.28662e-10	-2.39606e-10	-2.37056e-10	-2.10249e-10	-2.23877e-10
910	1.56065e-07	1.60908e-09	-2.37759e-10	-1.64951e-10	-2.25661e-10	3.59855e-10	3.16526e-07	1.09806e-09	1.21189e-13	-1.42824e-10	-2.29752e-10	-2.28294e-10	-2.32547e-10	-2.40523e-10
917	1.5607e-07	1.62646e-09	-2.30903e-10	-1.58573e-10	-2.17784e-10	3.4678e-10	3.16683e-07	1.11797e-09	1.93155e-11	-1.50818e-10	-2.11921e-10	-2.30834e-10	-2.27994e-10	-2.36626e-10
924	1.56124e-07	1.61657e-09	-2.13731e-10	-1.60638e-10	-1.92031e-10	3.28339e-10	3.16965e-07	1.12407e-09	1.58075e-11	-1.44056e-10	-2.34205e-10	-2.29335e-10	-2.36114e-10	-2.21134e-10
931	1.56184e-07	1.61169e-09	-2.18855e-10	-1.56154e-10	-2.11709e-10	3.41433e-10	3.16824e-07	1.08947e-09	1.39693e-11	-1.48546e-10	-2.32373e-10	-2.23529e-10	-2.1874e-10	-2.12747e-10
938	1.56075e-07	1.62122e-09	-2.22666e-10	-1.60392e-10	-2.17727e-10	3.53306e-10	3.16817e-07	1.09118e-09	1.13951e-11	-1.58244e-10	-2.28812e-10	-2.23257e-10	-2.33204e-10	-2.3069e-10
945	1.56041e-07	1.59751e-09	-2.22756e-10	-1.70007e-10	-2.278e-10	3.28102e-10	3.16096e-07	1.10215e-09	1.96548e-11	-1.57045e-10	-2.3494e-10	-2.38554e-10	-2.38922e-10	-2.23831e-10
952	1.56086e-07	1.58066e-09	-2.18372e-10	-1.60239e-10	-2.16221e-10	3.69022e-10	3.16475e-07	1.11828e-09	2.59688e-11	-1.40631e-10	-2.10692e-10	-2.2628e-10	-2.08015e-10	-2.3071e-10
959	1.561e-07	1.62296e-09	-2.17215e-10	-1.51613e-10	-2.26478e-10	3.69284e-10	3.16454e-07	1.10709e-09	-6.43706e-12	-1.53135e-10	-2.26888e-10	-2.38214e-10	-2.37879e-10	-2.30984e-10
966	1.56157e-07	1.62527e-09	-2.34792e-10	-1.72328e-10	-2.24938e-10	3.52135e-10	3.17006e-07	1.13361e-09	2.0817e-11	-1.47374e-10	-2.19884e-10	-2.27788e-10	-2.329e-10	-2.27004e-10
973	1.5612e-07	1.648e-09	-2.28504e-10	-1.61168e-10	-2.40707e-10	3.29938e-10	3.16295e-07	1.11182e-09	1.30858e-11	-1.4451e-10	-2.42528e-10	-2.40074e-10	-2.35819e-10	-2.21221e-10
980	1.56135e-07	1.65134e-09	-2.18168e-10	-1.51052e-10	-2.23091e-10	3.51653e-10	3.16382e-07	1.12081e-09	6.14839e-12	-1.57662e-10	-2.21062e-10	-2.31406e-10	-2.44786e-10	-2.34132e-10
987	1.56088e-07	1.6419e-09	-2.31681e-10	-1.70435e-10	-2.3729e-10	3.25627e-10	3.16366e-07	1.08037e-09	2.52674e-11	-1.42996e-10	-2.35619e-10	-2.19908e-10	-2.34241e-10	-2.15336e-10
994	1.56127e-07	1.64179e-09	-2.27401e-10	-1.53764e-10	-2.22726e-10	3.74646e-10	3.16723e-07	1.10147e-09	2.65446e-11	-1.27887e-10	-2.30378e-10	-2.46379e-10	-2.24434e-10	-2.36846e-10
1001	1.56131e-07	1.64923e-09	-2.37518e-10	-1.70026e-10	-2.2503e-10	3.3092e-10	3.16348e-07	1.0897e-09	1.66651e-11	-1.58219e-10	-2.26978e-10	-2.14521e-10	-2.2083e-10	-2.31137e-10
1008	1.56171e-07	1.61958e-09	-2.20891e-10	-1.48375e-10	-2.36366e-10	3.47174e-10	3.16846e-07	1.08827e-09	3.91588e-11	-1.61333e-10	-2.31571e-10	-2.152e-10	-2.31848e-10	-2.47892e-10
1015	1.56221e-07	1.63805e-09	-2.32363e-10	-1.57098e-10	-2.17836e-10	3.29837e-10	3.1631e-07	1.13649e-09	-5.40933e-12	-1.31809e-10	-2.17204e-10	-2.35886e-10	-2.28909e-10	-2.1401e-10
1022	1.56121e-07	1.60874e-09	-2.24002e-10	-1.65519e-10	-2.33557e-10	3.55218e-10	3.16788e-07	1.09141e-09	2.16167e-11	-1.42272e-10	-2.23878e-10	-2.29914e-10	-2.24095e-10	-2.27727e-10
1029	1.56167e-07	1.6304e-09	-2.35837e-10	-1.64144e-10	-2.33385e-10	3.37959e-10	3.16476e-07	1.08049e-09	3.74499e-11	-1.42156e-10	-2.15758e-10	-2.39379e-10	-2.52294e-10	-2.28663e-10
1036	1.56175e-07	1.62591e-09	-2.15448e-10	-1.61678e-10	-2.33833e-10	3.3944e-10	3.16153e-07	1.08818e-09	2.98911e-11	-1.47976e-10	-2.25521e-10	-2.23918e-10	-2.2867e-10	-2.33126e-10
1043	1.56147e-07	1.62601e-09	-2.31143e-10	-1.62933e-10	-2.24118e-10	3.35743e-10	3.16666e-07	1.08285e-09	2.41949e-11	-1.38563e-10	-2.25078e-10	-2.26816e-10	-2.29215e-10	-2.31899e-10
1050	1.56203e-07	1.6229e-09	-2.20077e-10	-1.46298e-10	-2.13787e-10	3.15599e-10	3.16548e-07	1.09947e-09	2.1914e-11	-1.67076e-10	-2.15547e-10	-2.22559e-10	-2.22223e-10	-2.40633e-10
1057	1.56233e-07	1.6239e-09	-2.27864e-10	-1.588e-10	-2.0871e-10	3.44074e-10	3.16838e-07	1.09882e-09	1.91372e-11	-1.40999e-10	-2.08763e-10	-2.38483e-10	-2.34327e-10	-2.14067e-10
1064	1.5621e-07	1.58766e-09	-2.25281e-10	-1.57336e-10	-2.00727e-10	3.36539e-10	3.1681e-07	1.10379e-09	4.38133e-12	-1.60501e-10	-2.19076e-10	-2.36995e-10	-2.22186e-10	-2.29145e-10
1071	1.56133e-07	1.63734e-09	-2.20422e-10	-1.88024e-10	-2.15271e-10	3.46041e-10	3.16808e-07	1.09389e-09	1.37716e-11	-1.45692e-10	-2.29989e-10	-2.21396e-10	-2.24355e-10	-2.35131e-10
1078	1.56157e-07	1.63472e-09	-2.32618e-10	-1.63566e-10	-2.31907e-10	3.41261e-10	3.16519e-07	1.11863e-09	2.51676e-11	-1.36092e-10	-2.22274e-10	-2.31759e-10	-2.26321e-10	-2.3747e-10
1085	1.56187e-07	1.60789e-09	-2.34082e-10	-1.46575e-10	-2.23517e-10	3.34491e-10	3.16673e-07	1.09992e-09	4.17942e-11	-1.4419e-10	-2.2935e-10	-2.2518e-10	-2.33713e-10	-2.09581e-10
1092	1.56116e-07	1.61271e-09	-2.15604e-10	-1.64455e-10	-2.45346e-10	3.23258e-10	3.16469e-07	1.13021e-09	4.79219e-11	-1.49417e-10	-2.38509e-10	-2.11614e-10	-2.32479e-10	-2.28334e-10
1099	1.5617e-07	1.63122e-09	-2.25358e-10	-1.63625e-10	-2.31018e-10	3.18608e-10	3.17062e-07	1.10189e-09	2.48823e-11	-1.36409e-10	-2.31333e-10	-2.32722e-10	-2.32512e-10	-2.28732e-10
1106	1.56198e-07	1.60585e-09	-2.22523e-10	-1.66778e-10	-2.30952e-10	3.34882e-10	3.16488e-07	1.10154e-09	1.17298e-11	-1.55061e-10	-2.2893e-10	-2.36986e-10	-2.36564e-10	-2.31686e-10
1113	1.56135e-07	1.65207e-09	-2.40997e-10	-1.63374e-10	-2.4011e-10	3.51213e-10	3.16663e-07	1.10373e-09	-2.45328e-12	-1.5207e-10	-2.12257e-10	-2.42227e-10	-2.29028e-10	-2.26168e-10
1120	1.56202e-07	1.63708e-09	-2.20392e-10	-1.58842e-10	-2.09009e-10	3.31363e-10	3.1653e-07	1.1283e-09	6.16249e-12	-1.53109e-10	-2.15034e-10	-2.30654e-10	-2.31828e-10	-2.24723e-10
1127	1.56243e-07	1.63111e-09	-2.39194e-10	-1.57346e-10	-2.16252e-10	3.17774e-10	3.16983e-07	1.09464e-09	1.74042e-11	-1.47703e-10	-2.17462e-10	-2.21745e-10	-2.27767e-10	-2.07732e-10
1134	1.56169e-07	1.63235e-09	-2.27625e-10	-1.52087e-10	-2.24857e-10	3.2275e-10	3.16794e-07	1.08806e-09	2.66813e-11	-1.61337e-10	-1.99018e-10	-2.31948e-10	-2.14302e-10	-2.3964e-10
1141	1.56221e-07	1.63299e-09	-2.29128e-10	-1.54381e-10	-2.36562e-10	3.1292e-10	3.1678e-07	1.09002e-09	1.52605e-11	-1.58868e-10	-2.28375e-10	-2.19e-10	-2.43806e-10	-2.22851e-10
1148	1.56185e-07	1.64147e-09	-2.14808e-10	-1.52945e-10	-2.19357e-10	3.41489e-10	3.17124e-07	1.08004e-09	5.71136e-11	-1.25106e-10	-2.24132e-10	-2.33526e-10	-2.38466e-10	-2.25117e-10
1155	1.56194e-07	1.64332e-09	-2.14841e-10	-1.55905e-10	-2.22942e-10	3.33244e-10	3.16392e-07	1.09837e-09	-5.05016e-12	-1.56007e-10	-2.21943e-10	-2.12722e-10	-2.51522e-10	-2.2447e-10
1162	1.56266e-07	1.6329e-09	-2.22515e-10	-1.50123e-10	-2.23674e-10	3.20759e-10	3.17435e-07	1.07843e-09	7.92252e-12	-1.56616e-10	-2.4147e-10	-2.2956e-10	-2.3755e-10	-2.32206e-10
1169	1.5631e-07	1.59278e-09	-2.25869e-10	-1.74119e-10	-2.08698e-10	3.68662e-10	3.17037e-07	1.05986e-09	1.29653e-11	-1.68454e-10	-2.366e-10	-2.46884e-10	-2.26659e-10	-2.34744e-10
1176	1.5632e-07	1.61343e-09	-2.18565e-10	-1.54744e-10	-2.10106e-10	3.32031e-10	3.17277e-07	1.08982e-09	2.22542e-11	-1.41853e-10	-2.21453e-10	-2.36297e-10	-2.43084e-10	-2.21574e-10
1183	1.56297e-07	1.647e-09	-2.14254e-10	-1.76573e-10	-2.34886e-10	3.27699e-10	3.17277e-07	1.09494e-09	1.84124e-12	-1.48627e-10	-2.35915e-10	-2.35986e-10	-2.20009e-10	-2.25253e-10
1190	1.56244e-07	1.60549e-09	-2.27125e-10	-1.64104e-10	-2.16414e-10	3.12234e-10	3.16642e-07	1.0997e-09	1.14e-11	-1.6853e-10	-2.35038e-10	-2.42961e-10	-2.44589e-10	-2.41164e-10
1197	1.56251e-07	1.64466e-09	-2.12376e-10	-1.4245e-10	-2.20991e-10	3.35741e-10	3.17158e-07	1.08445e-09	7.07622e-12	-1.45451e-10	-2.2244e-10	-2.21867e-10	-2.2399e-10	-2.3566e-10
1204	1.56169e-07	1.62562e-09	-2.12811e-10	-1.69807e-10	-2.25299e-10	3.04876e-10	3.16715e-07	1.10501e-09	3.35667e-11	-1.32854e-10	-2.21813e-10	-2.21005e-10	-2.29226e-10	-2.29031e-10
1211	1.56257e-07	1.58588e-09	-2.29255e-10	-1.58476e-10	-2.21697e-10	3.13062e-10	3.17089e-07	1.09364e-09	2.86127e-11	-1.48006e-10	-2.19606e-10	-2.2698e-10	-2.27728e-10	-2.16603e-10
1218	1.56243e-07	1.62859e-09	-2.20193e-10	-1.62968e-10	-2.41906e-10	3.50984e-10	3.17057e-07	1.12285e-09	3.69906e-11	-1.66623e-10	-2.19458e-10	-2.31862e-10	-2.22314e-10	-2.36756e-10
1225	1.56297e-07	1.63457e-09	-2.30985e-10	-1.75668e-10	-2.09256e-10	3.42492e-10	3.16873e-07	1.0975e-09	1.86756e-11	-1.44927e-10	-2.34051e-10	-2.18078e-10	-2.1839e-10	-2.33587e-10
1232	1.56216e-07	1.63125e-09	-2.28375e-10	-1.68161e-10	-2.27878e-10	3.17192e-10	3.16985e-07	1.06685e-09	2.1616e-11	-1.51137e-10	-2.30239e-10	-2.02975e-10	-2.33596e-10	-2.11907e-10
1239	1.56272e-07	1.65637e-09	-2.19686e-10	-1.54295e-10	-2.23944e-10	3.1898e-10	3.16847e-07	1.10906e-09	2.83856e-11	-1.46001e-10	-2.19893e-10	-2.27416e-10	-2.23421e-10	-2.22567e-10
1246	1.56243e-07	1.62602e-09	-2.4146e-10	-1.70923e-10	-1.99501e-10	3.23228e-10	3.17029e-07	1.10949e-09	2.82903e-11	-1.58032e-10	-2.17738e-10	-2.38481e-10	-2.32549e-10	-2.20562e-10
1253	1.56276e-07	1.59805e-09	-2.23382e-10	-1.48741e-10	-2.2979e-10	3.23444e-10	3.17232e-07	1.09986e-09	1.85849e-11	-1.62834e-10	-2.03965e-10	-2.19744e-10	-2.20603e-10	-2.36501e-10
1260	1.56368e-07	1.63881e-09	-2.26918e-10	-1.57862e-10	-2.24023e-10	3.26382e-10	3.16895e-07	1.1087e-09	4.52356e-12	-1.50636e-10	-2.15045e-10	-2.18443e-10	-2.19251e-10	-2.40214e-10
1267	1.56266e-07	1.63182e-09	-2.28645e-10	-1.70282e-10	-2.45693e-10	3.33006e-10	3.17482e-07	1.11577e-09	-6.81279e-12	-1.4956e-10	-2.26635e-10	-2.25751e-10	-2.52802e-10	-2.27029e-10
1274	1.56251e-07	1.60603e-09	-2.29359e-10	-1.38954e-10	-2.18614e-10	3.19648e-10	3.1664e-07	1.1087e-09	7.10117e-12	-1.55199e-10	-2.39275e-10	-2.30561e-10	-2.32551e-10	-2.1526e-10
1281	1.56319e-07	1.64653e-09	-2.36759e-10	-1.65165e-10	-2.09096e-10	3.62899e-10	3.17184e-07	1.07525e-09	4.52295e-11	-1.64824e-10	-2.40653e-10	-2.3373e-10	-2.44638e-10	-2.23693e-10
1288	1.56224e-07	1.60602e-09	-2.3575e-10	-1.58862e-10	-2.16699e-10	3.49186e-10	3.16847e-07	1.08813e-09	1.52375e-11	-1.50037e-10	-2.2193e-10	-2.19496e-10	-2.27568e-10	-2.18723e-10
1295	1.5618e-07	1.63054e-09	-2.14709e-10	-1.53708e-10	-2.17277e-10	3.47412e-10	3.17028e-07	1.0836e-09	1.98722e-11	-1.53061e-10	-2.131e-10	-2.25813e-10	-2.26974e-10	-2.18531e-10
1302	1.56237e-07	1.6338e-09	-2.41352e-10	-1.65863e-10	-2.385e-10	3.31002e-10	3.16737e-07	1.08569e-09	2.23775e-11	-1.31046e-10	-2.21442e-10	-2.4008e-10	-2.36228e-10	-2.22623e-10
1309	1.56164e-07	1.63378e-09	-2.21764e-10	-1.69717e-10	-2.26462e-10	2.965e-10	3.1665e-07	1.11656e-09	1.60627e-11	-1.50222e-10	-2.19548e-10	-2.37816e-10	-2.22902e-10	-2.2547e-10
1316	1.56171e-07	1.62964e-09	-2.27691e-10	-1.4989e-10	-2.11648e-10	2.97492e-10	3.16458e-07	1.0825e-09	-1.9041e-12	-1.59514e-10	-2.33481e-10	-2.34115e-10	-2.31766e-10	-2.26602e-10
1323	1.56227e-07	1.65308e-09	-2.17733e-10	-1.55414e-10	-2.25156e-10	3.15259e-10	3.16539e-07	1.10974e-09	2.76291e-11	-1.58638e-10	-2.44933e-10	-2.25283e-10	-2.28326e-10	-2.22547e-10
1330	1.56259e-07	1.64863e-09	-2.30308e-10	-1.67551e-10	-2.31823e-10	3.33792e-10	3.16648e-07	1.09963e-09	9.63881e-12	-1.49472e-10	-2.37036e-10	-2.23043e-10	-2.28232e-10	-2.28306e-10
1337	1.56177e-07	1.62756e-09	-2.26411e-10	-1.55588e-10	-2.27752e-10	3.19656e-10	3.16773e-07	1.13658e-09	1.9347e-11	-1.34814e-10	-2.23465e-10	-2.37267e-10	-2.1787e-10	-2.20562e-10
1344	1.56238e-07	1.61228e-09	-2.39615e-10	-1.42306e-10	-2.23725e-10	3.20846e-10	3.16686e-07	1.07807e-09	2.0628e-11	-1.5556e-10	-2.34935e-10	-2.21668e-10	-2.20173e-10	-2.39761e-10
1351	1.56278e-07	1.62965e-09	-2.24702e-10	-1.58123e-10	-2.33389e-10	3.63289e-10	3.16405e-07	1.10723e-09	-1.24784e-12	-1.64358e-10	-2.31052e-10	-2.28638e-10	-2.24871e-10	-2.41385e-10
1358	1.56166e-07	1.60029e-09	-2.19977e-10	-1.5512e-10	-2.15429e-10	2.95132e-10	3.16972e-07	1.10206e-09	2.47669e-11	-1.41046e-10	-2.27911e-10	-2.27056e-10	-2.28405e-10	-2.31392e-10
1365	1.56198e-07	1.63153e-09	-2.11696e-10	-1.73873e-10	-2.33089e-10	3.27499e-10	3.16447e-07	1.0899e-09	-4.37818e-12	-1.55364e-10	-2.1507e-10	-2.39335e-10	-2.22691e-10	-2.32629e-10
1372	1.56224e-07	1.62303e-09	-2.2159e-10	-1.52229e-10	-2.18297e-10	3.2427e-10	3.16664e-07	1.06865e-09	3.5924e-11	-1.61174e-10	-2.39192e-10	-2.29888e-10	-2.42705e-10	-2.37038e-10
1379	1.56173e-07	1.643e-09	-2.25499e-10	-1.71847e-10	-2.19177e-10	3.05217e-10	3.16564e-07	1.09013e-09	1.89853e-12	-1.6922e-10	-2.28702e-10	-2.21036e-10	-2.24692e-10	-2.40581e-10
1386	1.5614e-07	1.60183e-09	-2.19172e-10	-1.62119e-10	-2.27876e-10	2.90424e-10	3.16325e-07	1.10932e-09	-1.84746e-11	-1.60702e-10	-2.21831e-10	-2.14546e-10	-2.16982e-10	-2.4405e-10
1393	1.56278e-07	1.62583e-09	-2.27264e-10	-1.37438e-10	-2.10335e-10	3.21585e-10	3.1672e-07	1.07695e-09	4.95099e-12	-1.47468e-10	-2.2447e-10	-2.41581e-10	-2.11185e-10	-2.41415e-10
1400	1.56197e-07	1.63457e-09	-2.20065e-10	-1.62096e-10	-2.17025e-10	3.339e-10	3.16207e-07	1.06579e-09	1.12613e-11	-1.58843e-10	-2.21048e-10	-2.33548e-10	-2.3798e-10	-2.0153e-10
1407	1.56238e-07	1.59161e-09	-2.27101e-10	-1.55012e-10	-2.25782e-10	3.35649e-10	3.16785e-07	1.0854e-09	8.13131e-12	-1.45848e-10	-2.30252e-10	-2.29408e-10	-2.34271e-10	-2.29736e-10
1414	1.56193e-07	1.63288e-09	-2.16677e-10	-1.5607e-10	-2.24968e-10	3.03685e-10	3.16694e-07	1.09174e-09	2.51938e-12	-1.72304e-10	-2.31188e-10	-2.35006e-10	-2.25454e-10	-2.19635e-10
1421	1.56205e-07	1.62411e-09	-2.31509e-10	-1.73739e-10	-2.33722e-10	3.36584e-10	3.16343e-07	1.07549e-09	2.53066e-11	-1.49089e-10	-2.4765e-10	-2.26972e-10	-2.30116e-10	-2.21096e-10
1428	1.56215e-07	1.62101e-09	-2.17884e-10	-1.65573e-10	-2.37467e-10	2.96447e-10	3.1679e-07	1.09521e-09	1.86049e-11	-1.59343e-10	-2.18158e-10	-2.40728e-10	-2.3867e-10	-2.29327e-10
1435	1.56263e-07	1.62118e-09	-2.24987e-10	-1.6898e-10	-2.25383e-10	3.22245e-10	3.16659e-07	1.10396e-09	7.5433e-13	-1.42325e-10	-2.362e-10	-2.29716e-10	-2.21849e-10	-2.15344e-10
1442	1.56139e-07	1.6204e-09	-2.20393e-10	-1.80532e-10	-2.19773e-10	3.20746e-10	3.16452e-07	1.04922e-09	2.30038e-11	-1.47927e-10	-2.19866e-10	-2.24203e-10	-2.27355e-10	-2.13169e-10
1449	1.56197e-07	1.65058e-09	-2.31601e-10	-1.40404e-10	-2.29949e-10	3.48795e-10	3.16816e-07	1.09514e-09	1.13335e-11	-1.54968e-10	-2.15515e-10	-2.3191e-10	-2.37627e-10	-2.40301e-10
1456	1.56121e-07	1.60699e-09	-2.18467e-10	-1.63551e-10	-2.16559e-10	3.28724e-10	3.16255e-07	1.08471e-09	6.60643e-12	-1.54455e-10	-2.22352e-10	-2.28099e-10	-2.14813e-10	-2.45882e-10
1463	1.56236e-07	1.603e-09	-2.3919e-10	-1.38754e-10	-2.18781e-10	3.19747e-10	3.16913e-07	1.08771e-09	8.95091e-12	-1.57128e-10	-2.24472e-10	-2.30882e-10	-2.30954e-10	-2.14228e-10
1470	1.5622e-07	1.63239e-09	-2.18544e-10	-1.67392e-10	-2.15436e-10	3.36724e-10	3.16643e-07	1.08438e-09	2.78354e-11	-1.57443e-10	-2.4181e-10	-2.40887e-10	-2.30663e-10	-2.08319e-10
1477	1.56199e-07	1.63063e-09	-2.3365e-10	-1.60186e-10	-2.10941e-10	3.31623e-10	3.16088e-07	1.07155e-09	4.38846e-11	-1.73619e-10	-2.19241e-10	-2.33049e-10	-2.33021e-10	-2.42693e-10
1484	1.56213e-07	1.62398e-09	-2.27551e-10	-1.65205e-10	-2.18222e-10	3.14603e-10	3.1666e-07	1.10193e-09	1.81458e-11	-1.71745e-10	-2.39794e-10	-2.30783e-10	-2.31204e-10	-2.39592e-10
1491	1.56092e-07	1.61311e-09	-2.21736e-10	-1.75634e-10	-2.16619e-10	3.47855e-10	3.16247e-07	1.08861e-09	2.27567e-11	-1.57032e-10	-2.07041e-10	-2.23906e-10	-2.27747e-10	-2.35414e-10
1498	1.56129e-07	1.62286e-09	-2.25044e-10	-1.54796e-10	-2.09112e-10	3.24395e-10	3.16613e-07	1.06938e-09	-7.714e-13	-1.51723e-10	-2.39e-10	-2.31918e-10	-2.15084e-10	-2.12808e-10
1505	1.56156e-07	1.64309e-09	-2.15546e-10	-1.54371e-10	-2.17523e-10	3.30296e-10	3.16755e-07	1.0771e-09	1.2611e-11	-1.48153e-10	-2.42086e-10	-2.25504e-10	-2.17813e-10	-2.22041e-10
1512	1.56096e-07	1.60379e-09	-2.20056e-10	-1.67765e-10	-2.2052e-10	3.09706e-10	3.16335e-07	1.07464e-09	3.76743e-11	-1.54111e-10	-2.38114e-10	-2.32043e-10	-2.24536e-10	-2.38512e-10
1519	1.56173e-07	1.60434e-09	-2.22884e-10	-1.49959e-10	-2.13683e-10	3.17651e-10	3.16734e-07	1.08333e-09	1.54881e-11	-1.37363e-10	-2.24329e-10	-2.3383e-10	-2.47813e-10	-2.39771e-10
1526	1.5616e-07	1.65043e-09	-2.305e-10	-1.77586e-10	-2.17979e-10	3.01418e-10	3.16858e-07	1.0868e-09	6.45929e-13	-1.6125e-10	-2.17455e-10	-2.25598e-10	-2.23965e-10	-2.29242e-10
1533	1.56139e-07	1.61787e-09	-2.29332e-10	-1.65048e-10	-2.12238e-10	3.20261e-10	3.16321e-07	1.1199e-09	1.68721e-11	-1.60901e-10	-2.48096e-10	-2.32179e-10	-2.34419e-10	-2.3177e-10
1540	1.56098e-07	1.58832e-09	-2.23539e-10	-1.69069e-10	-2.27949e-10	3.31283e-10	3.16762e-07	1.09056e-09	7.30164e-12	-1.64354e-10	-2.33177e-10	-2.29426e-10	-2.45267e-10	-2.31977e-10
1547	1.56098e-07	1.61864e-09	-2.10994e-10	-1.7242e-10	-2.38429e-10	3.25159e-10	3.16728e-07	1.07441e-09	7.38315e-13	-1.5915e-10	-2.36002e-10	-2.26993e-10	-2.15393e-10	-2.41574e-10
1554	1.56093e-07	1.57505e-09	-2.17326e-10	-1.59685e-10	-2.2597e-10	3.17292e-10	3.16509e-07	1.05949e-09	2.46171e-11	-1.64161e-10	-2.07397e-10	-2.22469e-10	-2.27334e-10	-2.2423e-10
OAA_5 (tube furnace)
Time (s)	Total signal intesity	m/z 2	m/z 12	m/z 14	m/z 15	m/z 18	m/z 40	m/z 28	m/z 32	m/z 44	m/z 33	m/z 34	m/z 48	m/z 64
0	1.56818e-07	1.8482e-09	-3.12304e-10	-2.54481e-10	-2.83358e-10	1.70077e-10	3.31643e-07	1.03104e-09	-7.21796e-11	-2.4006e-10	-3.02313e-10	-2.96799e-10	-2.93656e-10	-2.94265e-10
7	1.56214e-07	1.8411e-09	-2.96453e-10	-2.47682e-10	-2.94094e-10	1.83913e-10	3.31553e-07	1.06509e-09	-8.58255e-11	-2.48793e-10	-3.06382e-10	-3.08154e-10	-3.08333e-10	-3.22405e-10
14	1.56192e-07	1.85452e-09	-3.07518e-10	-2.48635e-10	-3.00133e-10	1.74758e-10	3.31822e-07	1.04805e-09	-9.17416e-11	-2.66873e-10	-3.0717e-10	-3.12863e-10	-3.16704e-10	-3.1554e-10
21	1.56117e-07	1.79097e-09	-2.94025e-10	-2.40447e-10	-2.9717e-10	2.09918e-10	3.31686e-07	1.15258e-09	-5.8051e-11	-2.5113e-10	-2.88278e-10	-2.98628e-10	-2.84468e-10	-3.09844e-10
28	1.56126e-07	1.83887e-09	-2.97286e-10	-2.16324e-10	-3.01084e-10	1.82011e-10	3.31102e-07	1.60035e-09	3.41086e-11	-2.5117e-10	-3.04868e-10	-3.24461e-10	-3.15487e-10	-3.0444e-10
35	1.56119e-07	1.8251e-09	-3.09317e-10	-1.68124e-10	-3.07061e-10	1.8629e-10	3.30526e-07	2.23503e-09	1.04407e-10	-2.04633e-10	-2.99019e-10	-3.24125e-10	-2.95148e-10	-2.89009e-10
42	1.56084e-07	1.79684e-09	-3.03786e-10	-1.60886e-10	-3.01458e-10	1.79265e-10	3.30052e-07	2.25119e-09	6.60304e-11	-2.61923e-10	-2.99325e-10	-3.16746e-10	-3.18035e-10	-3.0976e-10
49	1.56019e-07	1.81653e-09	-3.04626e-10	-1.91259e-10	-2.72675e-10	1.98449e-10	3.30694e-07	1.80242e-09	2.042e-11	-2.38503e-10	-2.96995e-10	-3.13736e-10	-3.0612e-10	-3.04867e-10
56	1.56076e-07	1.81354e-09	-3.03437e-10	-1.9791e-10	-2.98894e-10	1.86132e-10	3.31771e-07	1.46262e-09	-4.60965e-11	-2.35574e-10	-2.94236e-10	-3.06072e-10	-2.98705e-10	-3.0933e-10
63	1.5613e-07	1.85018e-09	-2.81808e-10	-2.39938e-10	-2.87395e-10	1.59231e-10	3.3165e-07	1.27119e-09	-4.39043e-11	-2.46128e-10	-3.1675e-10	-3.09109e-10	-3.18503e-10	-3.12844e-10
70	1.56394e-07	3.03952e-09	-3.06517e-10	-2.40853e-10	-2.90136e-10	1.74991e-10	3.31942e-07	1.2133e-09	-5.9675e-11	-2.63596e-10	-3.09299e-10	-2.95426e-10	-2.92783e-10	-3.22294e-10
77	1.56589e-07	8.12502e-09	-2.90752e-10	-2.53482e-10	-2.96782e-10	2.67152e-10	3.31352e-07	1.27967e-09	-6.37679e-11	-6.82558e-11	-3.02973e-10	-3.07648e-10	-2.99379e-10	-3.13916e-10
84	1.56812e-07	1.34842e-08	-2.87027e-10	-2.40396e-10	-2.93085e-10	3.1485e-10	3.29966e-07	1.90799e-09	-6.70296e-11	1.12255e-09	-3.1116e-10	-3.06624e-10	-3.17154e-10	-3.09019e-10
91	1.56578e-07	1.75895e-08	-1.6707e-10	-2.33108e-10	-3.08573e-10	4.86368e-10	3.24859e-07	3.74168e-09	-8.54084e-11	5.10293e-09	-3.07038e-10	-3.0565e-10	-3.04979e-10	-3.04194e-10
98	1.55052e-07	2.0219e-08	1.78038e-10	-2.21348e-10	-3.02349e-10	8.55405e-10	3.15006e-07	6.76278e-09	-8.89357e-11	1.1982e-08	-3.12326e-10	-3.18303e-10	-3.01307e-10	-3.14723e-10
105	1.53105e-07	2.2001e-08	5.81474e-10	-2.01636e-10	-2.75436e-10	1.33878e-09	3.04536e-07	9.76273e-09	-7.27705e-11	1.83372e-08	-3.26055e-10	-3.0119e-10	-3.14814e-10	-2.80681e-10
112	1.51743e-07	2.30032e-08	8.31366e-10	-1.96749e-10	-2.86363e-10	1.79594e-09	2.98106e-07	1.19615e-08	-1.01912e-10	2.25284e-08	-3.08872e-10	-3.11656e-10	-3.15753e-10	-2.87706e-10
119	1.51036e-07	2.33846e-08	1.03431e-09	-2.00824e-10	-2.77448e-10	2.17753e-09	2.94553e-07	1.33857e-08	-1.01489e-10	2.48295e-08	-2.91106e-10	-3.08058e-10	-3.05629e-10	-3.21845e-10
126	1.50679e-07	2.33106e-08	1.12014e-09	-1.89999e-10	-2.80006e-10	2.57012e-09	2.92051e-07	1.43693e-08	-6.21849e-11	2.60313e-08	-3.23672e-10	-3.0659e-10	-3.19071e-10	-3.0679e-10
133	1.50499e-07	2.25062e-08	1.17754e-09	-1.99862e-10	-2.83879e-10	2.82001e-09	2.90913e-07	1.48398e-08	-6.70221e-11	2.62944e-08	-3.05646e-10	-3.05913e-10	-2.94576e-10	-2.99468e-10
140	1.50407e-07	2.09667e-08	1.17044e-09	-1.7692e-10	-2.79868e-10	3.01506e-09	2.91467e-07	1.47028e-08	-5.77974e-11	2.54435e-08	-3.02735e-10	-3.06217e-10	-3.13561e-10	-3.15458e-10
147	1.50671e-07	1.83931e-08	1.06353e-09	-1.69469e-10	-2.81568e-10	3.00422e-09	2.95518e-07	1.34896e-08	-2.16053e-11	2.24023e-08	-3.0714e-10	-3.11907e-10	-2.96366e-10	-3.10193e-10
154	1.5141e-07	1.54597e-08	8.30933e-10	-1.62237e-10	-2.74367e-10	2.81193e-09	3.02974e-07	1.13787e-08	-7.63699e-11	1.73788e-08	-3.24909e-10	-3.16014e-10	-2.81466e-10	-3.11263e-10
161	1.52637e-07	1.26539e-08	5.41142e-10	-2.10232e-10	-2.65852e-10	2.56111e-09	3.11624e-07	8.86991e-09	-7.9809e-11	1.17485e-08	-2.94683e-10	-3.2646e-10	-3.03035e-10	-3.19299e-10
168	1.53861e-07	1.01434e-08	2.27261e-10	-1.87136e-10	-3.0838e-10	2.21971e-09	3.19239e-07	6.52471e-09	-7.69683e-11	6.9899e-09	-3.13262e-10	-3.21923e-10	-3.27605e-10	-2.99543e-10
175	1.54916e-07	8.27919e-09	1.59192e-11	-1.8739e-10	-3.0304e-10	1.92473e-09	3.24633e-07	4.81111e-09	-7.15529e-11	3.76026e-09	-3.07697e-10	-3.07872e-10	-3.09285e-10	-2.98807e-10
182	1.55638e-07	6.73717e-09	-1.113e-10	-2.03151e-10	-3.00608e-10	1.64603e-09	3.27954e-07	3.58052e-09	-6.98988e-11	1.91548e-09	-2.88059e-10	-3.16929e-10	-3.15638e-10	-3.14769e-10
189	1.56044e-07	5.6615e-09	-2.172e-10	-2.20475e-10	-3.04076e-10	1.41542e-09	3.30852e-07	2.84472e-09	-7.12226e-11	9.62425e-10	-3.12678e-10	-3.08922e-10	-3.22272e-10	-3.02514e-10
196	1.56266e-07	4.91223e-09	-2.3208e-10	-2.40943e-10	-2.89956e-10	1.29564e-09	3.32233e-07	2.48529e-09	-1.06626e-10	4.3682e-10	-3.09403e-10	-3.06414e-10	-3.06139e-10	-3.05556e-10
203	1.56572e-07	4.34426e-09	-2.50687e-10	-2.42361e-10	-2.90746e-10	1.15084e-09	3.33723e-07	2.17941e-09	-9.37644e-11	2.4301e-10	-2.8619e-10	-2.86617e-10	-3.11627e-10	-3.06083e-10
210	1.56769e-07	3.95569e-09	-2.80251e-10	-2.46118e-10	-2.94243e-10	1.03875e-09	3.34118e-07	2.05505e-09	-9.48689e-11	9.17889e-11	-3.11561e-10	-3.08171e-10	-3.2226e-10	-3.36535e-10
217	1.56862e-07	3.6725e-09	-2.80419e-10	-2.14667e-10	-2.66575e-10	1.00235e-09	3.34e-07	1.97096e-09	-7.25529e-11	6.32913e-11	-3.12485e-10	-2.86224e-10	-3.18016e-10	-3.16572e-10
224	1.56894e-07	3.36969e-09	-2.87441e-10	-2.35392e-10	-3.14326e-10	9.20571e-10	3.33959e-07	1.87875e-09	-8.52626e-11	3.56182e-11	-3.12381e-10	-3.06708e-10	-3.12662e-10	-3.12442e-10
231	1.56921e-07	3.25353e-09	-2.73693e-10	-2.32972e-10	-3.09436e-10	8.76165e-10	3.34184e-07	1.80738e-09	-7.14993e-11	6.71032e-12	-3.03515e-10	-2.97975e-10	-3.28505e-10	-3.0374e-10
238	1.56842e-07	3.08784e-09	-2.8594e-10	-2.18366e-10	-2.86775e-10	8.14388e-10	3.34428e-07	1.76689e-09	-9.59457e-11	1.4446e-11	-2.94696e-10	-3.03967e-10	-3.1418e-10	-3.09454e-10
245	1.56845e-07	2.98393e-09	-2.91621e-10	-2.29354e-10	-2.97701e-10	7.85857e-10	3.34088e-07	1.6941e-09	-1.08414e-10	-3.79697e-11	-3.16744e-10	-3.07766e-10	-3.10184e-10	-3.21666e-10
252	1.56776e-07	2.86248e-09	-2.84087e-10	-2.30916e-10	-2.8314e-10	7.53902e-10	3.34751e-07	1.70025e-09	-9.45546e-11	-2.4892e-11	-3.02402e-10	-3.1061e-10	-3.05799e-10	-3.20599e-10
259	1.56853e-07	2.8333e-09	-2.84617e-10	-2.17853e-10	-2.99057e-10	7.44506e-10	3.34538e-07	1.72803e-09	-8.74286e-11	-2.299e-11	-3.19907e-10	-2.96564e-10	-3.1146e-10	-3.01645e-10
266	1.56835e-07	2.75586e-09	-2.95255e-10	-2.41567e-10	-2.96848e-10	6.83561e-10	3.34404e-07	1.67458e-09	-8.25555e-11	-3.43699e-11	-2.91146e-10	-3.04985e-10	-2.99382e-10	-3.16993e-10
273	1.56483e-07	2.66479e-09	-3.05873e-10	-2.14048e-10	-2.88186e-10	6.99445e-10	3.33618e-07	1.67557e-09	-7.38409e-11	-3.94401e-12	-2.98416e-10	-3.03313e-10	-3.03637e-10	-2.93353e-10
280	1.56359e-07	2.6095e-09	-2.76856e-10	-2.41679e-10	-2.99613e-10	6.26842e-10	3.33033e-07	1.65739e-09	-9.61352e-11	-4.04216e-11	-3.09745e-10	-3.23492e-10	-3.07081e-10	-2.92032e-10
287	1.56299e-07	2.61237e-09	-2.71356e-10	-2.25492e-10	-2.65893e-10	6.48152e-10	3.33289e-07	1.60102e-09	-1.04835e-10	-5.35071e-11	-3.13385e-10	-3.33468e-10	-3.08611e-10	-3.05133e-10
294	1.56267e-07	2.53248e-09	-2.99955e-10	-2.23783e-10	-3.02469e-10	5.83892e-10	3.33593e-07	1.62897e-09	-5.22947e-11	-1.07385e-11	-3.04289e-10	-2.98109e-10	-2.91715e-10	-3.04099e-10
301	1.56296e-07	2.53001e-09	-2.92473e-10	-2.19325e-10	-2.84375e-10	5.91059e-10	3.33706e-07	1.62086e-09	-1.13508e-10	-5.10964e-11	-3.08355e-10	-3.12169e-10	-3.14559e-10	-3.11399e-10
308	1.56253e-07	2.47688e-09	-2.87302e-10	-2.36837e-10	-2.85279e-10	5.72098e-10	3.33561e-07	1.59354e-09	-7.66093e-11	-4.88732e-11	-3.2258e-10	-3.2358e-10	-3.18129e-10	-3.09679e-10
315	1.56273e-07	2.43959e-09	-2.75482e-10	-2.1858e-10	-2.95024e-10	5.79031e-10	3.3303e-07	1.5832e-09	-9.99476e-11	-4.75334e-11	-2.94687e-10	-3.19168e-10	-3.08114e-10	-2.64222e-10
322	1.56304e-07	2.42234e-09	-2.79891e-10	-2.36673e-10	-3.05087e-10	6.04638e-10	3.32693e-07	1.58318e-09	-5.65852e-11	-5.29624e-11	-3.16703e-10	-3.20227e-10	-2.76538e-10	-2.88754e-10
329	1.56273e-07	2.39529e-09	-2.90141e-10	-2.3113e-10	-3.00935e-10	5.46388e-10	3.33357e-07	1.56472e-09	-8.19804e-11	-6.64653e-11	-3.05918e-10	-3.14192e-10	-3.21352e-10	-3.11445e-10
336	1.56229e-07	2.39902e-09	-2.91597e-10	-2.47694e-10	-3.13112e-10	5.4058e-10	3.33742e-07	1.56976e-09	-7.61323e-11	-6.65849e-11	-3.13887e-10	-2.98202e-10	-3.12427e-10	-3.14554e-10
343	1.56277e-07	2.39539e-09	-3.06349e-10	-2.33212e-10	-3.05857e-10	5.23451e-10	3.33659e-07	1.57909e-09	-7.11563e-11	-4.24297e-11	-2.96952e-10	-3.10775e-10	-3.26049e-10	-3.19232e-10
350	1.56252e-07	2.36571e-09	-2.73515e-10	-2.12209e-10	-2.90574e-10	5.2188e-10	3.33233e-07	1.56778e-09	-9.84881e-11	-6.66729e-11	-3.09956e-10	-3.12e-10	-3.18609e-10	-2.98204e-10
357	1.56282e-07	2.33976e-09	-3.14894e-10	-2.45197e-10	-2.85546e-10	5.1057e-10	3.33166e-07	1.5443e-09	-7.22997e-11	-7.99047e-11	-3.0336e-10	-3.11019e-10	-3.22322e-10	-3.12786e-10
364	1.56299e-07	2.32916e-09	-3.03117e-10	-2.21497e-10	-2.92515e-10	5.21534e-10	3.33511e-07	1.55966e-09	-9.71089e-11	-7.48533e-11	-2.94036e-10	-3.13134e-10	-3.11041e-10	-3.15683e-10
371	1.56258e-07	2.33863e-09	-2.99709e-10	-2.10032e-10	-2.88533e-10	4.87673e-10	3.33509e-07	1.57014e-09	-6.98104e-11	-4.96357e-11	-3.14114e-10	-3.16949e-10	-3.09207e-10	-3.11002e-10
378	1.56265e-07	2.31723e-09	-2.79827e-10	-2.49607e-10	-3.14205e-10	4.91289e-10	3.33725e-07	1.52732e-09	-8.64981e-11	-4.09569e-11	-3.10053e-10	-3.13196e-10	-3.1087e-10	-3.29376e-10
385	1.5621e-07	2.29029e-09	-2.76819e-10	-2.34522e-10	-3.08778e-10	4.8795e-10	3.33524e-07	1.49932e-09	-9.27328e-11	-6.35423e-11	-3.00835e-10	-3.03504e-10	-3.16034e-10	-3.16275e-10
392	1.56274e-07	2.23505e-09	-3.02166e-10	-2.26181e-10	-2.98247e-10	5.11635e-10	3.33177e-07	1.52179e-09	-1.04511e-10	-9.85015e-11	-3.10955e-10	-3.15739e-10	-2.84959e-10	-3.16791e-10
399	1.56242e-07	2.28304e-09	-2.85814e-10	-2.3694e-10	-3.03132e-10	4.76196e-10	3.33129e-07	1.51756e-09	-8.01074e-11	-6.32239e-11	-3.0528e-10	-3.28776e-10	-3.12153e-10	-3.3039e-10
406	1.56263e-07	2.23462e-09	-2.93138e-10	-2.21799e-10	-3.02808e-10	4.82752e-10	3.33591e-07	1.49305e-09	-9.78737e-11	-7.78687e-11	-3.01265e-10	-3.13339e-10	-2.95203e-10	-3.19033e-10
413	1.5621e-07	2.24437e-09	-3.07175e-10	-2.04446e-10	-3.01713e-10	4.63945e-10	3.33958e-07	1.47959e-09	-6.63205e-11	-7.24265e-11	-3.12655e-10	-3.18855e-10	-2.93564e-10	-3.13047e-10
420	1.56237e-07	2.24507e-09	-2.8199e-10	-2.04387e-10	-2.89796e-10	4.53346e-10	3.34036e-07	1.48881e-09	-9.06412e-11	-4.03491e-11	-3.1067e-10	-3.12781e-10	-3.00733e-10	-3.08938e-10
427	1.56219e-07	2.23044e-09	-2.96026e-10	-2.18695e-10	-2.98494e-10	4.50174e-10	3.33995e-07	1.53595e-09	-9.73545e-11	-9.40126e-11	-2.97549e-10	-3.03479e-10	-2.88946e-10	-3.14926e-10
434	1.56219e-07	2.21798e-09	-3.00587e-10	-2.44803e-10	-3.10098e-10	4.65254e-10	3.33577e-07	1.50777e-09	-9.89469e-11	-7.56411e-11	-3.10528e-10	-3.15531e-10	-2.99926e-10	-3.12747e-10
441	1.56263e-07	2.23281e-09	-3.04097e-10	-2.33611e-10	-2.90092e-10	4.51284e-10	3.33112e-07	1.53042e-09	-9.11923e-11	-7.018e-11	-2.97575e-10	-3.01278e-10	-3.01426e-10	-3.19201e-10
448	1.56283e-07	2.20423e-09	-3.07493e-10	-2.21701e-10	-3.18659e-10	4.53096e-10	3.33403e-07	1.48791e-09	-8.09027e-11	-7.53213e-11	-3.15452e-10	-3.07671e-10	-3.09968e-10	-3.22752e-10
455	1.56252e-07	2.17616e-09	-3.01586e-10	-2.15704e-10	-2.68678e-10	4.21678e-10	3.33883e-07	1.47835e-09	-8.10914e-11	-1.06363e-10	-2.94446e-10	-3.13916e-10	-3.04435e-10	-3.28257e-10
462	1.56279e-07	2.14795e-09	-2.8858e-10	-2.26293e-10	-2.8483e-10	4.64188e-10	3.34262e-07	1.43161e-09	-8.27967e-11	-8.28275e-11	-3.08038e-10	-3.14525e-10	-3.05805e-10	-3.14509e-10
469	1.56309e-07	2.19059e-09	-2.8943e-10	-2.18342e-10	-3.00137e-10	4.31015e-10	3.3398e-07	1.49796e-09	-6.89064e-11	-1.1305e-10	-3.04859e-10	-3.27831e-10	-3.23558e-10	-2.95781e-10
476	1.56251e-07	2.14259e-09	-2.92515e-10	-2.10111e-10	-3.05714e-10	4.36188e-10	3.33712e-07	1.49062e-09	-1.18678e-10	-8.927e-11	-2.98995e-10	-2.98956e-10	-3.10519e-10	-3.14296e-10
483	1.5622e-07	2.14828e-09	-2.93777e-10	-2.12301e-10	-2.94108e-10	4.18508e-10	3.33225e-07	1.51444e-09	-8.93456e-11	-1.24595e-10	-3.18537e-10	-3.09212e-10	-3.10021e-10	-3.22728e-10
490	1.56252e-07	2.14131e-09	-2.89303e-10	-2.43382e-10	-2.96466e-10	4.15263e-10	3.33877e-07	1.48058e-09	-7.57782e-11	-1.07284e-10	-2.90798e-10	-3.1582e-10	-3.10446e-10	-3.05449e-10
497	1.56333e-07	2.15519e-09	-2.71964e-10	-2.33526e-10	-2.78012e-10	3.8699e-10	3.34016e-07	1.4631e-09	-7.14368e-11	-1.05345e-10	-3.00216e-10	-3.2884e-10	-3.18878e-10	-3.00757e-10
504	1.56311e-07	2.17628e-09	-3.06462e-10	-2.28608e-10	-3.00868e-10	4.03331e-10	3.33943e-07	1.45974e-09	-9.32292e-11	-8.99227e-11	-3.00825e-10	-3.19083e-10	-3.10852e-10	-3.1624e-10
511	1.56363e-07	2.11909e-09	-2.97681e-10	-2.33594e-10	-2.88454e-10	3.95278e-10	3.33802e-07	1.45912e-09	-8.53702e-11	-1.0234e-10	-2.88075e-10	-3.23016e-10	-3.14375e-10	-3.20702e-10
518	1.56333e-07	2.14863e-09	-3.07477e-10	-2.33215e-10	-3.05997e-10	3.96498e-10	3.3352e-07	1.45756e-09	-7.14748e-11	-9.85106e-11	-3.04134e-10	-3.16283e-10	-2.99969e-10	-3.08618e-10
525	1.56349e-07	2.08058e-09	-2.97066e-10	-2.44934e-10	-2.93388e-10	4.05967e-10	3.33357e-07	1.44403e-09	-1.08099e-10	-1.35291e-10	-3.07127e-10	-2.98495e-10	-3.1583e-10	-3.23576e-10
532	1.5629e-07	2.12799e-09	-3.13521e-10	-2.22716e-10	-2.91146e-10	4.15696e-10	3.32807e-07	1.4517e-09	-8.02758e-11	-1.08001e-10	-3.19181e-10	-2.99107e-10	-3.08654e-10	-2.84075e-10
539	1.563e-07	2.11523e-09	-2.99911e-10	-2.26152e-10	-2.81655e-10	3.48447e-10	3.33153e-07	1.47135e-09	-8.37524e-11	-1.17414e-10	-3.32653e-10	-3.02689e-10	-3.24107e-10	-3.10332e-10
546	1.56311e-07	2.10386e-09	-2.85591e-10	-2.08018e-10	-3.03005e-10	3.82006e-10	3.3375e-07	1.43383e-09	-9.8407e-11	-9.51464e-11	-3.06099e-10	-3.11102e-10	-3.12458e-10	-3.21673e-10
553	1.56316e-07	2.14281e-09	-2.95637e-10	-2.45009e-10	-3.22266e-10	4.03558e-10	3.33861e-07	1.47378e-09	-1.07997e-10	-1.21167e-10	-3.05867e-10	-3.02526e-10	-3.14848e-10	-3.20555e-10
560	1.56285e-07	2.11913e-09	-2.99915e-10	-2.20393e-10	-3.06355e-10	4.0262e-10	3.33965e-07	1.47043e-09	-8.93719e-11	-9.48434e-11	-3.23213e-10	-3.16965e-10	-3.12427e-10	-2.98176e-10
567	1.56312e-07	2.10702e-09	-3.11741e-10	-2.0548e-10	-3.0899e-10	3.9559e-10	3.33548e-07	1.44663e-09	-1.07378e-10	-9.82642e-11	-3.02378e-10	-3.14661e-10	-3.12864e-10	-3.10235e-10
574	1.56268e-07	2.08515e-09	-3.09353e-10	-2.33537e-10	-3.30964e-10	3.97822e-10	3.33502e-07	1.47282e-09	-6.07085e-11	-1.18272e-10	-3.10741e-10	-3.23012e-10	-3.09623e-10	-3.11867e-10
581	1.56321e-07	2.1033e-09	-2.94878e-10	-2.46474e-10	-3.09138e-10	4.15653e-10	3.33913e-07	1.4643e-09	-8.71057e-11	-1.11227e-10	-2.96185e-10	-3.1094e-10	-3.02081e-10	-3.24257e-10
588	1.56308e-07	2.10362e-09	-2.78866e-10	-2.39944e-10	-3.11951e-10	4.0907e-10	3.3374e-07	1.47632e-09	-1.02329e-10	-8.49164e-11	-3.12301e-10	-3.2103e-10	-3.19092e-10	-3.15501e-10
595	1.56403e-07	2.10145e-09	-3.0836e-10	-2.31876e-10	-3.2888e-10	3.57225e-10	3.33974e-07	1.4393e-09	-1.15939e-10	-1.37397e-10	-2.94592e-10	-3.14448e-10	-3.04188e-10	-3.09361e-10
602	1.56365e-07	2.11628e-09	-3.10224e-10	-2.2364e-10	-3.06225e-10	3.73372e-10	3.34352e-07	1.46885e-09	-9.66221e-11	-8.42977e-11	-3.24406e-10	-3.1188e-10	-3.02767e-10	-3.10545e-10
609	1.56314e-07	2.08804e-09	-2.94604e-10	-2.40175e-10	-2.89766e-10	3.65067e-10	3.33801e-07	1.43531e-09	-1.02248e-10	-1.2311e-10	-3.16666e-10	-3.11276e-10	-3.1529e-10	-2.96005e-10
616	1.56353e-07	2.1177e-09	-2.88244e-10	-2.41689e-10	-3.14259e-10	3.75245e-10	3.3361e-07	1.4224e-09	-1.13148e-10	-1.16684e-10	-3.21304e-10	-3.12495e-10	-3.1129e-10	-2.82697e-10
623	1.5631e-07	2.0804e-09	-3.07523e-10	-2.35795e-10	-2.89561e-10	3.7411e-10	3.33497e-07	1.46574e-09	-7.51829e-11	-1.04637e-10	-3.09729e-10	-2.84113e-10	-3.11535e-10	-3.08465e-10
630	1.56314e-07	2.10488e-09	-2.90287e-10	-2.40037e-10	-3.02494e-10	3.49589e-10	3.33709e-07	1.4463e-09	-8.36387e-11	-1.02054e-10	-3.11661e-10	-2.94914e-10	-3.25051e-10	-3.13746e-10
637	1.56426e-07	2.03604e-09	-2.84826e-10	-2.24512e-10	-2.93941e-10	3.67588e-10	3.33841e-07	1.45705e-09	-1.08214e-10	-1.20521e-10	-3.13816e-10	-2.94314e-10	-3.1524e-10	-3.07161e-10
644	1.56423e-07	2.06169e-09	-3.06104e-10	-2.37034e-10	-3.20008e-10	4.05044e-10	3.337e-07	1.42291e-09	-7.12356e-11	-1.11981e-10	-2.98259e-10	-3.15573e-10	-3.15921e-10	-3.10708e-10
651	1.5635e-07	2.05147e-09	-3.02366e-10	-2.46108e-10	-3.06196e-10	3.46032e-10	3.34314e-07	1.45208e-09	-1.04582e-10	-1.19591e-10	-3.05637e-10	-3.03616e-10	-2.99273e-10	-3.03237e-10
658	1.56323e-07	2.07997e-09	-2.90058e-10	-2.28489e-10	-2.96467e-10	3.66232e-10	3.34248e-07	1.47005e-09	-9.79298e-11	-1.24851e-10	-3.16105e-10	-2.91046e-10	-3.13124e-10	-3.18614e-10
665	1.56318e-07	2.08911e-09	-3.02392e-10	-2.19881e-10	-3.08675e-10	3.6528e-10	3.34187e-07	1.40063e-09	-1.31575e-10	-1.23828e-10	-3.08041e-10	-2.91249e-10	-3.00058e-10	-3.05871e-10
672	1.5635e-07	2.10052e-09	-3.17999e-10	-2.36942e-10	-3.07904e-10	3.91906e-10	3.33577e-07	1.47468e-09	-8.08643e-11	-1.32792e-10	-3.09154e-10	-3.08317e-10	-3.09464e-10	-3.03945e-10
679	1.56368e-07	2.0643e-09	-3.02352e-10	-2.35866e-10	-3.07436e-10	3.70266e-10	3.33916e-07	1.44275e-09	-1.12933e-10	-1.15201e-10	-2.99239e-10	-3.00877e-10	-3.1103e-10	-3.12399e-10
686	1.56392e-07	2.07144e-09	-3.16338e-10	-2.01069e-10	-2.9738e-10	3.45724e-10	3.33526e-07	1.46184e-09	-9.5624e-11	-1.37554e-10	-3.08578e-10	-2.90386e-10	-3.33519e-10	-3.17269e-10
693	1.56415e-07	2.06097e-09	-3.05412e-10	-2.16213e-10	-3.00585e-10	3.39786e-10	3.33416e-07	1.46063e-09	-9.87755e-11	-1.10639e-10	-3.18138e-10	-3.13134e-10	-3.28422e-10	-3.25776e-10
700	1.56409e-07	2.04744e-09	-3.056e-10	-2.12941e-10	-3.09858e-10	3.43758e-10	3.33773e-07	1.44341e-09	-1.00763e-10	-1.07273e-10	-3.11507e-10	-2.95848e-10	-2.94218e-10	-3.17628e-10
707	1.56374e-07	2.06534e-09	-3.08372e-10	-2.4218e-10	-3.07387e-10	3.69907e-10	3.33856e-07	1.46654e-09	-7.61559e-11	-1.09289e-10	-3.08449e-10	-3.04607e-10	-2.93982e-10	-3.06358e-10
714	1.56329e-07	2.08241e-09	-3.09975e-10	-2.25331e-10	-3.14408e-10	3.66037e-10	3.33843e-07	1.45383e-09	-1.09374e-10	-1.47934e-10	-3.14823e-10	-3.07994e-10	-3.07914e-10	-3.19702e-10
721	1.56351e-07	2.07547e-09	-3.15031e-10	-2.34042e-10	-3.02502e-10	3.85803e-10	3.33941e-07	1.44225e-09	-7.35022e-11	-1.39152e-10	-2.98315e-10	-2.99306e-10	-3.04463e-10	-3.14316e-10
728	1.56348e-07	2.04747e-09	-3.05353e-10	-2.32124e-10	-3.17127e-10	3.40222e-10	3.3394e-07	1.44105e-09	-5.34827e-11	-1.33498e-10	-2.96859e-10	-3.19497e-10	-3.18359e-10	-3.11476e-10
735	1.56321e-07	2.06638e-09	-2.92681e-10	-1.97073e-10	-3.13158e-10	3.57481e-10	3.33674e-07	1.41797e-09	-1.0402e-10	-1.31901e-10	-3.11059e-10	-3.23369e-10	-3.06334e-10	-2.96139e-10
742	1.56292e-07	2.04153e-09	-3.03938e-10	-2.21275e-10	-3.2303e-10	3.29579e-10	3.33877e-07	1.41413e-09	-7.72628e-11	-1.32868e-10	-3.02984e-10	-3.2194e-10	-3.09038e-10	-3.0038e-10
749	1.56313e-07	2.05638e-09	-3.03881e-10	-2.1393e-10	-3.02986e-10	3.36473e-10	3.33583e-07	1.40245e-09	-1.06929e-10	-1.42137e-10	-2.97929e-10	-3.25897e-10	-3.17652e-10	-3.18958e-10
756	1.56319e-07	2.01872e-09	-3.02384e-10	-2.15064e-10	-2.80108e-10	3.44018e-10	3.33473e-07	1.38797e-09	-7.70111e-11	-1.45776e-10	-2.90255e-10	-3.0004e-10	-3.08095e-10	-3.12876e-10
763	1.5636e-07	2.0219e-09	-2.90343e-10	-2.47843e-10	-3.10333e-10	3.49493e-10	3.33557e-07	1.40524e-09	-1.136e-10	-1.09177e-10	-3.19665e-10	-2.95286e-10	-3.18414e-10	-2.99016e-10
770	1.56337e-07	2.04035e-09	-2.99988e-10	-2.16774e-10	-2.92616e-10	3.59806e-10	3.33945e-07	1.42476e-09	-9.66329e-11	-1.25869e-10	-2.99249e-10	-3.03837e-10	-3.21436e-10	-3.21117e-10
777	1.56298e-07	2.02464e-09	-3.023e-10	-2.26711e-10	-3.18109e-10	3.38425e-10	3.34469e-07	1.44038e-09	-8.92447e-11	-1.16665e-10	-3.27089e-10	-2.93068e-10	-3.21131e-10	-3.04583e-10
784	1.5625e-07	2.05136e-09	-2.97708e-10	-2.07462e-10	-2.99665e-10	3.4024e-10	3.34095e-07	1.42805e-09	-7.89403e-11	-1.58212e-10	-3.13931e-10	-2.97437e-10	-3.22993e-10	-2.94817e-10
791	1.56301e-07	2.02724e-09	-3.11724e-10	-2.20838e-10	-3.05375e-10	3.57127e-10	3.33888e-07	1.42614e-09	-1.06847e-10	-1.22934e-10	-2.94429e-10	-3.07106e-10	-3.06008e-10	-3.09335e-10
798	1.56274e-07	2.03269e-09	-2.85733e-10	-2.14057e-10	-3.1522e-10	3.32714e-10	3.33588e-07	1.39235e-09	-8.39305e-11	-1.4246e-10	-3.16446e-10	-3.10628e-10	-3.16362e-10	-3.16858e-10
805	1.56238e-07	2.04371e-09	-2.99247e-10	-2.05968e-10	-3.03927e-10	3.42406e-10	3.33606e-07	1.38722e-09	-1.14368e-10	-1.25504e-10	-3.12394e-10	-3.12602e-10	-3.0083e-10	-3.07947e-10
812	1.56299e-07	2.00702e-09	-2.81733e-10	-2.48691e-10	-3.05696e-10	3.36509e-10	3.34012e-07	1.42559e-09	-1.13974e-10	-1.60944e-10	-3.07537e-10	-3.24316e-10	-3.00058e-10	-3.03016e-10
819	1.56348e-07	2.03672e-09	-3.02177e-10	-2.38655e-10	-3.01907e-10	3.15172e-10	3.34132e-07	1.388e-09	-9.23019e-11	-1.60553e-10	-3.0821e-10	-3.23893e-10	-3.04189e-10	-3.169e-10
826	1.56288e-07	2.05185e-09	-3.14738e-10	-2.10548e-10	-3.10365e-10	3.2328e-10	3.34493e-07	1.40712e-09	-9.82693e-11	-1.18245e-10	-3.07095e-10	-3.00935e-10	-3.18439e-10	-3.10847e-10
833	1.56305e-07	2.05e-09	-3.02464e-10	-2.36477e-10	-3.049e-10	3.21306e-10	3.34162e-07	1.41548e-09	-1.15082e-10	-1.06843e-10	-3.16707e-10	-3.12242e-10	-3.05554e-10	-3.09569e-10
840	1.56338e-07	2.01442e-09	-3.04715e-10	-2.26655e-10	-3.0237e-10	3.18075e-10	3.34192e-07	1.45399e-09	-8.45315e-11	-1.48795e-10	-3.24081e-10	-3.07902e-10	-3.18793e-10	-3.25515e-10
847	1.56368e-07	2.00849e-09	-2.97088e-10	-1.9739e-10	-3.05484e-10	3.26546e-10	3.33378e-07	1.43097e-09	-9.0539e-11	-1.62054e-10	-3.10717e-10	-3.07477e-10	-3.15286e-10	-3.10628e-10
854	1.56335e-07	2.01359e-09	-3.10312e-10	-2.25604e-10	-3.2036e-10	3.28217e-10	3.33649e-07	1.40845e-09	-1.19304e-10	-1.45494e-10	-3.01384e-10	-3.18424e-10	-3.06674e-10	-3.07634e-10
861	1.56331e-07	2.0309e-09	-2.93333e-10	-2.28421e-10	-3.00804e-10	3.28962e-10	3.33819e-07	1.43368e-09	-9.14902e-11	-1.36594e-10	-3.04829e-10	-3.21762e-10	-2.91952e-10	-3.00429e-10
868	1.56305e-07	2.00715e-09	-3.03007e-10	-2.42908e-10	-2.92582e-10	3.07682e-10	3.34033e-07	1.4041e-09	-9.36757e-11	-1.55324e-10	-3.12168e-10	-3.1722e-10	-3.12903e-10	-3.13658e-10
875	1.56317e-07	2.03591e-09	-2.96247e-10	-2.17056e-10	-3.03966e-10	3.14728e-10	3.34411e-07	1.41717e-09	-1.25865e-10	-1.37065e-10	-2.95161e-10	-3.21697e-10	-3.13041e-10	-3.19338e-10
882	1.56375e-07	1.99895e-09	-3.05509e-10	-2.3437e-10	-3.0702e-10	3.20888e-10	3.34275e-07	1.39152e-09	-7.07267e-11	-1.32058e-10	-3.15151e-10	-3.14476e-10	-3.09585e-10	-3.1895e-10
889	1.56398e-07	2.01187e-09	-3.16782e-10	-2.16463e-10	-3.06511e-10	3.25147e-10	3.33839e-07	1.40276e-09	-7.89492e-11	-1.20226e-10	-3.11257e-10	-3.11155e-10	-3.24514e-10	-3.2156e-10
896	1.56428e-07	2.01667e-09	-3.08732e-10	-2.41861e-10	-3.20524e-10	3.12379e-10	3.33766e-07	1.43405e-09	-9.9667e-11	-1.50074e-10	-3.1335e-10	-3.0756e-10	-3.2148e-10	-3.26056e-10
903	1.5638e-07	1.98799e-09	-3.07332e-10	-2.39799e-10	-3.03696e-10	3.09447e-10	3.33146e-07	1.44379e-09	-8.96391e-11	-1.31322e-10	-3.08394e-10	-2.98163e-10	-2.96324e-10	-3.14306e-10
910	1.56318e-07	2.0103e-09	-2.88803e-10	-2.34395e-10	-3.09531e-10	3.414e-10	3.33489e-07	1.37758e-09	-9.14935e-11	-1.19851e-10	-3.07804e-10	-3.13165e-10	-3.27256e-10	-3.09868e-10
917	1.56332e-07	1.98017e-09	-2.79689e-10	-2.46692e-10	-3.17352e-10	3.24206e-10	3.33807e-07	1.38676e-09	-7.8765e-11	-1.58001e-10	-3.00644e-10	-3.23499e-10	-3.06362e-10	-2.95494e-10
924	1.56356e-07	1.99073e-09	-2.9482e-10	-2.36263e-10	-2.80246e-10	2.96353e-10	3.33967e-07	1.40797e-09	-1.0819e-10	-1.64348e-10	-2.938e-10	-3.14833e-10	-3.06028e-10	-3.07751e-10
931	1.56364e-07	1.99507e-09	-3.22026e-10	-2.25586e-10	-2.93947e-10	3.41982e-10	3.34082e-07	1.41025e-09	-9.99104e-11	-1.27246e-10	-3.21258e-10	-3.23134e-10	-3.37166e-10	-2.98693e-10
938	1.56353e-07	1.97519e-09	-2.93129e-10	-2.47184e-10	-2.89283e-10	3.14883e-10	3.34392e-07	1.40459e-09	-9.92744e-11	-1.72828e-10	-3.05881e-10	-2.8844e-10	-3.11955e-10	-3.18118e-10
945	1.56358e-07	2.02042e-09	-2.84677e-10	-2.38125e-10	-3.10205e-10	3.27181e-10	3.34503e-07	1.40051e-09	-1.13646e-10	-1.48785e-10	-2.98618e-10	-3.27562e-10	-3.18765e-10	-3.35445e-10
952	1.56382e-07	2.00258e-09	-2.96343e-10	-2.02791e-10	-2.79783e-10	3.39219e-10	3.33989e-07	1.39544e-09	-9.61966e-11	-1.70738e-10	-3.09287e-10	-2.97363e-10	-3.08158e-10	-3.07451e-10
959	1.56345e-07	2.01645e-09	-2.74666e-10	-2.22048e-10	-3.13937e-10	3.33252e-10	3.33689e-07	1.41212e-09	-8.92411e-11	-1.60621e-10	-3.0715e-10	-3.11801e-10	-3.19614e-10	-3.14321e-10
966	1.56355e-07	1.99584e-09	-3.18108e-10	-2.30049e-10	-3.04727e-10	3.57764e-10	3.33515e-07	1.36785e-09	-8.31074e-11	-1.49582e-10	-3.05003e-10	-2.91535e-10	-3.18489e-10	-2.95494e-10
973	1.56375e-07	2.00447e-09	-2.94595e-10	-2.3985e-10	-2.93996e-10	3.06631e-10	3.34171e-07	1.40631e-09	-8.02116e-11	-1.38053e-10	-3.1854e-10	-2.79999e-10	-3.03499e-10	-3.29332e-10
980	1.56355e-07	1.97696e-09	-2.93452e-10	-2.45225e-10	-3.13759e-10	3.18952e-10	3.34441e-07	1.3708e-09	-9.22101e-11	-1.59221e-10	-2.79646e-10	-3.24472e-10	-3.02706e-10	-3.2916e-10
987	1.56395e-07	1.96386e-09	-3.10891e-10	-2.26051e-10	-3.046e-10	3.45929e-10	3.3458e-07	1.39888e-09	-1.17807e-10	-1.52158e-10	-3.23885e-10	-3.28472e-10	-3.19129e-10	-3.17748e-10
994	1.56376e-07	2.00845e-09	-2.94528e-10	-2.33151e-10	-3.07266e-10	3.08876e-10	3.34583e-07	1.39779e-09	-1.02879e-10	-1.57319e-10	-3.09897e-10	-3.11947e-10	-3.05424e-10	-3.07571e-10
1001	1.56389e-07	1.99715e-09	-3.12138e-10	-2.35088e-10	-2.86448e-10	3.51283e-10	3.33758e-07	1.37927e-09	-1.04675e-10	-1.61329e-10	-3.23747e-10	-3.32629e-10	-3.13617e-10	-3.02167e-10
1008	1.56367e-07	1.97007e-09	-2.89828e-10	-2.25807e-10	-3.22737e-10	2.89694e-10	3.34151e-07	1.42142e-09	-9.43373e-11	-1.55341e-10	-2.99333e-10	-3.03298e-10	-3.08505e-10	-3.08686e-10
1015	1.56402e-07	2.02079e-09	-2.97919e-10	-2.33132e-10	-2.9853e-10	3.26489e-10	3.33725e-07	1.40243e-09	-9.01148e-11	-1.80711e-10	-2.92314e-10	-3.32333e-10	-2.84046e-10	-3.05113e-10
1022	1.56379e-07	2.02756e-09	-3.02624e-10	-2.43165e-10	-2.97331e-10	3.14985e-10	3.34115e-07	1.37747e-09	-8.69983e-11	-1.62893e-10	-3.03415e-10	-3.17926e-10	-3.23416e-10	-2.9306e-10
1029	1.56412e-07	1.97595e-09	-3.13159e-10	-2.13159e-10	-3.17279e-10	3.38618e-10	3.3422e-07	1.41501e-09	-9.9617e-11	-1.78599e-10	-3.00993e-10	-3.00546e-10	-3.11488e-10	-3.02783e-10
1036	1.56441e-07	1.99345e-09	-3.07309e-10	-2.33205e-10	-3.13051e-10	2.96562e-10	3.34436e-07	1.40772e-09	-9.83877e-11	-1.55992e-10	-3.05751e-10	-3.29828e-10	-3.15595e-10	-3.29698e-10
1043	1.56455e-07	1.96136e-09	-3.03824e-10	-2.35395e-10	-3.08234e-10	3.12036e-10	3.34376e-07	1.42681e-09	-8.06884e-11	-1.5116e-10	-3.22341e-10	-3.27325e-10	-3.31154e-10	-3.19952e-10
1050	1.56424e-07	1.96649e-09	-3.09796e-10	-2.27046e-10	-3.04912e-10	3.19229e-10	3.3435e-07	1.40512e-09	-1.00033e-10	-1.5877e-10	-3.13298e-10	-3.15572e-10	-2.99284e-10	-3.32946e-10
1057	1.56425e-07	2.00843e-09	-2.88049e-10	-2.23206e-10	-3.07728e-10	2.94038e-10	3.33876e-07	1.36143e-09	-8.88634e-11	-1.8663e-10	-2.99465e-10	-3.22417e-10	-3.30536e-10	-3.24004e-10
1064	1.56425e-07	1.98621e-09	-3.09339e-10	-2.23236e-10	-3.09011e-10	3.04838e-10	3.34002e-07	1.36609e-09	-1.10798e-10	-1.3478e-10	-2.98429e-10	-3.21907e-10	-3.09833e-10	-3.09346e-10
1071	1.56437e-07	1.99958e-09	-2.79595e-10	-2.40864e-10	-3.03283e-10	3.14126e-10	3.33954e-07	1.40109e-09	-1.11878e-10	-1.42922e-10	-3.32402e-10	-3.09837e-10	-3.22917e-10	-3.17444e-10
1078	1.56361e-07	1.95978e-09	-3.04354e-10	-2.41701e-10	-3.18177e-10	2.95559e-10	3.33684e-07	1.38227e-09	-1.1004e-10	-1.58375e-10	-3.06144e-10	-2.90598e-10	-3.24762e-10	-3.25384e-10
1085	1.5646e-07	1.96698e-09	-3.06719e-10	-2.20699e-10	-3.12608e-10	3.40378e-10	3.34081e-07	1.3883e-09	-9.64693e-11	-1.57414e-10	-3.24465e-10	-3.14861e-10	-3.11782e-10	-2.96727e-10
1092	1.56403e-07	1.97166e-09	-3.00527e-10	-2.29691e-10	-2.91263e-10	3.11141e-10	3.34044e-07	1.37683e-09	-9.0502e-11	-1.45033e-10	-2.97731e-10	-3.15387e-10	-2.94339e-10	-3.17157e-10
1099	1.5639e-07	1.97534e-09	-3.02353e-10	-2.28456e-10	-3.02183e-10	3.25629e-10	3.34403e-07	1.38734e-09	-6.45931e-11	-1.55403e-10	-3.11978e-10	-3.34349e-10	-3.1835e-10	-3.24666e-10
1106	1.56437e-07	1.97304e-09	-3.15879e-10	-2.58326e-10	-3.11867e-10	3.19836e-10	3.34785e-07	1.39106e-09	-1.04518e-10	-1.42545e-10	-3.25847e-10	-3.28802e-10	-3.09852e-10	-3.10254e-10
1113	1.56501e-07	1.95024e-09	-2.94786e-10	-2.01377e-10	-2.91288e-10	3.07453e-10	3.34504e-07	1.36104e-09	-1.00611e-10	-1.53572e-10	-3.05133e-10	-3.12789e-10	-2.88763e-10	-3.01304e-10
1120	1.56451e-07	1.96269e-09	-3.01104e-10	-2.24489e-10	-3.00845e-10	3.05899e-10	3.33952e-07	1.37682e-09	-1.03446e-10	-1.11869e-10	-3.02631e-10	-3.15141e-10	-3.22519e-10	-3.20969e-10
1127	1.56434e-07	1.96576e-09	-2.95477e-10	-2.39634e-10	-3.0482e-10	3.49189e-10	3.33941e-07	1.40752e-09	-9.51522e-11	-1.36006e-10	-3.24898e-10	-3.2006e-10	-3.23975e-10	-3.29004e-10
1134	1.56403e-07	1.92804e-09	-3.07758e-10	-2.35583e-10	-3.06089e-10	2.98277e-10	3.33916e-07	1.38791e-09	-8.80374e-11	-1.72664e-10	-3.14683e-10	-3.07059e-10	-3.31217e-10	-3.24212e-10
1141	1.56445e-07	1.98909e-09	-3.19606e-10	-2.45907e-10	-3.13683e-10	3.40118e-10	3.33985e-07	1.37267e-09	-1.12109e-10	-1.39863e-10	-3.3047e-10	-3.08064e-10	-3.26912e-10	-3.2684e-10
1148	1.56449e-07	1.90907e-09	-3.11324e-10	-2.19209e-10	-3.18106e-10	3.22453e-10	3.34127e-07	1.39324e-09	-1.09395e-10	-1.19334e-10	-3.11134e-10	-3.22004e-10	-3.21026e-10	-2.87943e-10
1155	1.56461e-07	1.93822e-09	-2.95431e-10	-2.25232e-10	-3.02886e-10	2.80165e-10	3.34307e-07	1.37058e-09	-7.76049e-11	-1.49945e-10	-3.25681e-10	-3.22297e-10	-2.91442e-10	-3.29041e-10
1162	1.56414e-07	1.94772e-09	-3.08944e-10	-2.28224e-10	-3.05961e-10	3.17647e-10	3.34735e-07	1.35472e-09	-9.12865e-11	-1.51605e-10	-3.32692e-10	-3.17166e-10	-3.22382e-10	-3.16204e-10
1169	1.56416e-07	1.96804e-09	-2.86444e-10	-2.30304e-10	-3.19651e-10	2.71749e-10	3.34538e-07	1.35265e-09	-1.08066e-10	-1.59981e-10	-3.10882e-10	-3.09825e-10	-3.13787e-10	-3.10732e-10
1176	1.56392e-07	1.94778e-09	-3.0072e-10	-2.37341e-10	-2.93482e-10	3.16054e-10	3.34397e-07	1.37323e-09	-1.10354e-10	-1.34531e-10	-3.28447e-10	-3.22009e-10	-3.14309e-10	-3.25399e-10
1183	1.5646e-07	1.94358e-09	-3.17547e-10	-2.30749e-10	-3.00997e-10	3.10165e-10	3.3414e-07	1.35201e-09	-8.2017e-11	-1.45376e-10	-3.06109e-10	-3.19886e-10	-3.11701e-10	-3.16341e-10
1190	1.56476e-07	1.97391e-09	-2.88496e-10	-2.34275e-10	-3.06982e-10	3.33375e-10	3.34081e-07	1.36431e-09	-6.97127e-11	-1.59781e-10	-3.00707e-10	-3.16631e-10	-3.17627e-10	-3.05024e-10
1197	1.56507e-07	1.98208e-09	-2.97881e-10	-2.4355e-10	-3.08414e-10	2.9134e-10	3.34657e-07	1.39097e-09	-1.13646e-10	-1.42733e-10	-3.13896e-10	-3.25762e-10	-3.04865e-10	-3.1547e-10
1204	1.56557e-07	2.00237e-09	-3.07145e-10	-2.13921e-10	-3.14122e-10	2.95116e-10	3.34642e-07	1.3953e-09	-7.16947e-11	-1.84586e-10	-3.27264e-10	-3.15823e-10	-3.14799e-10	-3.20382e-10
1211	1.56491e-07	1.96187e-09	-2.96698e-10	-2.26584e-10	-3.2605e-10	3.20907e-10	3.34603e-07	1.40475e-09	-7.76823e-11	-1.4893e-10	-3.16748e-10	-3.13875e-10	-3.09317e-10	-3.13419e-10
1218	1.56453e-07	1.94715e-09	-3.02487e-10	-2.18149e-10	-3.03603e-10	3.00259e-10	3.35034e-07	1.36805e-09	-7.30098e-11	-1.40542e-10	-3.03855e-10	-3.25492e-10	-3.1499e-10	-3.02305e-10
1225	1.56578e-07	1.97552e-09	-3.03199e-10	-2.50525e-10	-3.25981e-10	3.03566e-10	3.34761e-07	1.38041e-09	-8.93752e-11	-1.19387e-10	-3.11642e-10	-3.21815e-10	-3.08631e-10	-2.9952e-10
1232	1.56505e-07	1.98351e-09	-3.02167e-10	-2.3805e-10	-2.93317e-10	2.82105e-10	3.34463e-07	1.37183e-09	-1.05364e-10	-1.46643e-10	-3.21885e-10	-3.32865e-10	-2.91791e-10	-2.90311e-10
1239	1.56497e-07	1.966e-09	-3.08719e-10	-2.39282e-10	-3.23296e-10	2.88989e-10	3.34304e-07	1.35019e-09	-8.74025e-11	-1.57833e-10	-3.06733e-10	-3.2107e-10	-3.04541e-10	-3.09138e-10
1246	1.56545e-07	1.97894e-09	-3.03197e-10	-2.40167e-10	-3.08171e-10	3.03025e-10	3.34387e-07	1.37944e-09	-6.12989e-11	-1.66546e-10	-2.99706e-10	-3.12278e-10	-3.30853e-10	-3.01381e-10
1253	1.56607e-07	2.00521e-09	-3.06638e-10	-2.27712e-10	-3.07562e-10	3.04222e-10	3.3415e-07	1.34683e-09	-8.48507e-11	-1.83604e-10	-3.22219e-10	-3.33826e-10	-3.04102e-10	-2.97932e-10
1260	1.56598e-07	1.95709e-09	-3.13632e-10	-2.13696e-10	-3.12316e-10	2.92172e-10	3.34777e-07	1.38194e-09	-6.67939e-11	-1.64144e-10	-3.39299e-10	-3.27622e-10	-3.25117e-10	-3.35263e-10
1267	1.56596e-07	1.93097e-09	-3.19994e-10	-1.97234e-10	-2.98573e-10	3.26845e-10	3.34984e-07	1.38429e-09	-5.19395e-11	-1.67843e-10	-3.09201e-10	-3.22587e-10	-3.12716e-10	-2.98323e-10
1274	1.56634e-07	1.92275e-09	-2.91673e-10	-2.29784e-10	-2.963e-10	2.7373e-10	3.35026e-07	1.34559e-09	-7.96487e-11	-1.65816e-10	-3.03223e-10	-2.93891e-10	-3.05104e-10	-3.12578e-10
1281	1.56572e-07	1.98033e-09	-3.03568e-10	-2.12556e-10	-2.84884e-10	2.74407e-10	3.34711e-07	1.33087e-09	-8.62253e-11	-1.51648e-10	-3.20527e-10	-3.06042e-10	-3.07642e-10	-3.09922e-10
1288	1.5658e-07	1.94591e-09	-2.82673e-10	-2.24909e-10	-2.97074e-10	3.06931e-10	3.3473e-07	1.38381e-09	-4.77078e-11	-1.85414e-10	-3.10353e-10	-2.99582e-10	-3.1371e-10	-2.93164e-10
1295	1.56611e-07	1.94034e-09	-2.90433e-10	-2.42218e-10	-2.89712e-10	2.92081e-10	3.34139e-07	1.3724e-09	-8.91266e-11	-1.7985e-10	-3.17022e-10	-3.24463e-10	-3.04616e-10	-3.09473e-10
1302	1.5661e-07	1.94555e-09	-3.05099e-10	-2.23579e-10	-3.11462e-10	2.57752e-10	3.34599e-07	1.36576e-09	-8.18668e-11	-1.65006e-10	-3.07347e-10	-3.17221e-10	-3.08333e-10	-3.02455e-10
1309	1.56647e-07	1.96629e-09	-3.08174e-10	-2.36755e-10	-3.19375e-10	3.07372e-10	3.34942e-07	1.40521e-09	-8.68133e-11	-1.94871e-10	-3.02928e-10	-3.24863e-10	-3.12968e-10	-3.23594e-10
1316	1.56646e-07	1.9798e-09	-3.00819e-10	-2.27035e-10	-2.88059e-10	2.86243e-10	3.34758e-07	1.3628e-09	-5.50971e-11	-1.69979e-10	-3.09639e-10	-3.1329e-10	-3.16194e-10	-3.1573e-10
1323	1.56662e-07	1.92546e-09	-3.03341e-10	-2.27763e-10	-3.17949e-10	3.12507e-10	3.35236e-07	1.37702e-09	-7.76227e-11	-1.72001e-10	-3.25504e-10	-3.14826e-10	-3.23465e-10	-3.1238e-10
1330	1.56681e-07	1.95606e-09	-3.11855e-10	-2.30943e-10	-2.97018e-10	3.0243e-10	3.34815e-07	1.35776e-09	-8.21284e-11	-1.79582e-10	-2.959e-10	-2.96522e-10	-3.11044e-10	-3.34205e-10
1337	1.56699e-07	1.99267e-09	-3.06904e-10	-2.50244e-10	-2.96524e-10	2.82921e-10	3.34727e-07	1.33579e-09	-9.08929e-11	-1.66156e-10	-3.1856e-10	-3.23001e-10	-3.20251e-10	-3.14831e-10
1344	1.56667e-07	1.95115e-09	-3.2059e-10	-2.11252e-10	-3.0905e-10	2.78825e-10	3.34905e-07	1.34141e-09	-7.51982e-11	-1.78379e-10	-3.12655e-10	-3.0815e-10	-3.27322e-10	-3.1261e-10
1351	1.56714e-07	1.96569e-09	-3.06442e-10	-2.50954e-10	-3.26132e-10	2.83711e-10	3.34711e-07	1.35356e-09	-5.6707e-11	-1.65392e-10	-2.95863e-10	-3.19229e-10	-3.23853e-10	-2.93015e-10
1358	1.56725e-07	1.94043e-09	-2.90323e-10	-2.3735e-10	-2.82715e-10	2.83835e-10	3.35053e-07	1.35384e-09	-6.11791e-11	-1.83341e-10	-3.15487e-10	-3.17028e-10	-3.29288e-10	-3.11136e-10
1365	1.56761e-07	1.92374e-09	-3.10965e-10	-2.31944e-10	-2.83217e-10	3.10717e-10	3.34965e-07	1.35774e-09	-5.50705e-11	-1.61723e-10	-3.16104e-10	-3.18742e-10	-3.22111e-10	-2.9978e-10
1372	1.56741e-07	1.92722e-09	-2.95147e-10	-2.15668e-10	-2.99528e-10	2.48507e-10	3.35326e-07	1.38327e-09	-5.56828e-11	-1.93737e-10	-3.05385e-10	-2.89708e-10	-3.19202e-10	-3.13107e-10
1379	1.56711e-07	1.92429e-09	-3.02837e-10	-2.32199e-10	-2.96032e-10	2.97889e-10	3.35646e-07	1.36851e-09	-4.6572e-11	-1.81994e-10	-3.19007e-10	-3.03286e-10	-3.16608e-10	-3.19395e-10
1386	1.56777e-07	1.96291e-09	-2.82769e-10	-2.32722e-10	-2.98349e-10	3.19867e-10	3.3525e-07	1.33613e-09	-4.64366e-11	-1.46722e-10	-3.15394e-10	-3.17909e-10	-3.12651e-10	-3.26268e-10
1393	1.56796e-07	1.95021e-09	-3.19604e-10	-2.38734e-10	-2.89378e-10	2.65834e-10	3.35475e-07	1.35657e-09	-5.17063e-11	-1.84762e-10	-3.08741e-10	-3.09187e-10	-3.27923e-10	-3.16151e-10
1400	1.56797e-07	1.91131e-09	-3.06178e-10	-2.36708e-10	-3.06011e-10	2.87778e-10	3.34769e-07	1.37779e-09	-7.14763e-11	-1.75042e-10	-3.29123e-10	-3.28863e-10	-3.00095e-10	-3.2541e-10
1407	1.56769e-07	1.90103e-09	-3.02175e-10	-2.39488e-10	-3.01383e-10	2.79232e-10	3.35248e-07	1.35736e-09	-8.854e-11	-1.67531e-10	-3.26023e-10	-2.98522e-10	-3.08924e-10	-3.12975e-10
1414	1.56778e-07	1.96753e-09	-3.17877e-10	-2.28123e-10	-2.80106e-10	3.19546e-10	3.34941e-07	1.33028e-09	-5.78877e-11	-1.71356e-10	-2.94213e-10	-3.14823e-10	-3.08425e-10	-3.19765e-10
1421	1.56776e-07	1.95223e-09	-3.0895e-10	-2.25248e-10	-3.11022e-10	3.0395e-10	3.34663e-07	1.34958e-09	-6.01858e-11	-1.8983e-10	-3.13102e-10	-3.20229e-10	-3.1001e-10	-3.14226e-10
1428	1.56826e-07	1.9279e-09	-3.27092e-10	-2.39452e-10	-2.97175e-10	2.35561e-10	3.34865e-07	1.34678e-09	-7.37092e-11	-1.83775e-10	-2.96158e-10	-3.25732e-10	-3.18666e-10	-3.27959e-10
1435	1.56806e-07	1.96154e-09	-3.04545e-10	-1.93974e-10	-3.01739e-10	3.11514e-10	3.35152e-07	1.38544e-09	-5.79914e-11	-2.11438e-10	-3.08589e-10	-3.23603e-10	-3.14065e-10	-3.34271e-10
1442	1.56791e-07	1.95618e-09	-3.05667e-10	-2.10449e-10	-3.18636e-10	2.56673e-10	3.3558e-07	1.35969e-09	-6.24066e-11	-1.63533e-10	-3.09826e-10	-3.13964e-10	-2.86867e-10	-3.27578e-10
1449	1.56819e-07	1.96211e-09	-3.12501e-10	-2.08689e-10	-3.04635e-10	2.96676e-10	3.35402e-07	1.39354e-09	-4.02748e-11	-1.81666e-10	-3.14505e-10	-2.85925e-10	-3.14385e-10	-3.02873e-10
1456	1.56776e-07	1.94418e-09	-3.17848e-10	-2.35305e-10	-2.95089e-10	2.61386e-10	3.35254e-07	1.36203e-09	-4.69757e-11	-1.93764e-10	-3.11567e-10	-2.82983e-10	-3.0137e-10	-3.04107e-10
1463	1.56733e-07	1.96212e-09	-3.05071e-10	-2.22467e-10	-2.89326e-10	2.85052e-10	3.34981e-07	1.35186e-09	-7.48403e-11	-1.76524e-10	-3.0829e-10	-3.18979e-10	-3.09165e-10	-3.03538e-10
1470	1.56712e-07	1.98159e-09	-2.98213e-10	-2.4025e-10	-2.93623e-10	2.87861e-10	3.35113e-07	1.34242e-09	-7.41284e-11	-1.76622e-10	-3.06105e-10	-3.213e-10	-3.13034e-10	-3.03437e-10
1477	1.56764e-07	1.95299e-09	-2.95881e-10	-2.41112e-10	-3.01506e-10	2.85518e-10	3.35009e-07	1.35394e-09	-6.95321e-11	-1.90552e-10	-3.16263e-10	-3.04188e-10	-3.06258e-10	-3.08532e-10
1484	1.56776e-07	1.96239e-09	-2.98984e-10	-1.93147e-10	-3.06376e-10	2.68231e-10	3.3505e-07	1.32112e-09	-8.04004e-11	-1.95079e-10	-3.10477e-10	-3.09542e-10	-3.10353e-10	-3.12764e-10
1491	1.56784e-07	1.96126e-09	-3.14238e-10	-2.23078e-10	-2.79922e-10	2.44335e-10	3.35182e-07	1.35573e-09	-8.83064e-11	-2.06065e-10	-3.07414e-10	-3.19947e-10	-3.25444e-10	-3.30441e-10
1498	1.56711e-07	1.94879e-09	-3.12813e-10	-2.35279e-10	-2.98678e-10	2.61869e-10	3.35018e-07	1.34486e-09	-5.5481e-11	-2.00023e-10	-3.22058e-10	-3.19727e-10	-2.91155e-10	-3.14429e-10
1505	1.56777e-07	1.94624e-09	-2.96353e-10	-2.42982e-10	-3.11188e-10	3.06443e-10	3.35092e-07	1.31988e-09	-8.83484e-11	-1.66509e-10	-3.02739e-10	-3.11093e-10	-3.10853e-10	-3.08861e-10
1512	1.5674e-07	1.93527e-09	-3.1253e-10	-2.46561e-10	-2.62652e-10	2.74218e-10	3.35442e-07	1.37916e-09	-4.82578e-11	-1.84646e-10	-3.12664e-10	-3.04565e-10	-3.057e-10	-3.25461e-10
1519	1.56732e-07	1.94766e-09	-3.04528e-10	-2.3104e-10	-3.04006e-10	2.9526e-10	3.3488e-07	1.33778e-09	-2.95825e-11	-1.80219e-10	-3.0658e-10	-2.9918e-10	-3.06744e-10	-3.07256e-10
1526	1.56732e-07	1.92661e-09	-3.2767e-10	-2.38471e-10	-3.0035e-10	2.59645e-10	3.35033e-07	1.34294e-09	-7.96391e-11	-1.68203e-10	-2.9582e-10	-3.18225e-10	-2.98373e-10	-3.18412e-10
1533	1.56719e-07	1.91328e-09	-2.94932e-10	-2.41598e-10	-2.98238e-10	2.62271e-10	3.35126e-07	1.35373e-09	-5.91608e-11	-1.86181e-10	-2.87246e-10	-3.08613e-10	-3.08785e-10	-3.03639e-10
1540	1.56716e-07	1.9537e-09	-3.24455e-10	-2.4613e-10	-3.06629e-10	2.56746e-10	3.34676e-07	1.37503e-09	-5.22444e-11	-1.94893e-10	-3.19289e-10	-3.10655e-10	-3.08021e-10	-3.13483e-10
1547	1.56719e-07	1.91835e-09	-2.97419e-10	-2.26097e-10	-2.80923e-10	2.48759e-10	3.34674e-07	1.37447e-09	-6.8227e-11	-1.83244e-10	-3.02028e-10	-3.07073e-10	-3.10634e-10	-3.13042e-10
1554	1.56734e-07	1.95877e-09	-3.1137e-10	-2.29853e-10	-3.1218e-10	2.61919e-10	3.34656e-07	1.33464e-09	-7.51214e-11	-1.92528e-10	-2.93003e-10	-3.08373e-10	-3.16008e-10	-3.06112e-10
Blank
Time (s)	Total signal intesity	m/z 2	m/z 12	m/z 14	m/z 15	m/z 18	m/z 40	m/z 28	m/z 32	m/z 44	m/z 33	m/z 34	m/z 48	m/z 64
0	1.55321e-07	1.30871e-09	-1.4601e-10	-8.86865e-11	-1.5548e-10	3.29479e-10	3.06898e-07	9.73933e-10	4.23048e-11	-1.13013e-10	-1.53948e-10	-1.56878e-10	-1.58025e-10	-1.58427e-10
7	1.54719e-07	1.31362e-09	-1.66924e-10	-9.874e-11	-1.47633e-10	3.54755e-10	3.07053e-07	9.89122e-10	4.34868e-11	-1.05662e-10	-1.55156e-10	-1.48298e-10	-1.48895e-10	-1.65581e-10
14	1.5466e-07	1.29687e-09	-1.66235e-10	-9.12752e-11	-1.56143e-10	3.01885e-10	3.06423e-07	9.87477e-10	5.88195e-11	-9.58469e-11	-1.62489e-10	-1.52481e-10	-1.76019e-10	-1.66814e-10
21	1.54626e-07	1.32032e-09	-1.67874e-10	-1.05775e-10	-1.62614e-10	3.27135e-10	3.07074e-07	9.80013e-10	9.33254e-11	-1.08517e-10	-1.7355e-10	-1.45608e-10	-1.67977e-10	-1.61498e-10
28	1.5465e-07	1.30303e-09	-1.63919e-10	-1.07485e-10	-1.52221e-10	3.33645e-10	3.06514e-07	9.74446e-10	6.65993e-11	-9.8853e-11	-1.68114e-10	-1.58131e-10	-1.68302e-10	-1.59162e-10
35	1.54571e-07	1.3462e-09	-1.49417e-10	-1.10285e-10	-1.65179e-10	3.24402e-10	3.06673e-07	9.53268e-10	8.17911e-11	-1.04102e-10	-1.691e-10	-1.55565e-10	-1.53501e-10	-1.58411e-10
42	1.54614e-07	1.35325e-09	-1.58509e-10	-1.13442e-10	-1.67063e-10	3.18436e-10	3.06483e-07	1.00742e-09	4.49428e-11	-9.60371e-11	-1.58147e-10	-1.68391e-10	-1.58179e-10	-1.71429e-10
49	1.54611e-07	1.30102e-09	-1.5573e-10	-9.70609e-11	-1.64076e-10	3.17321e-10	3.06643e-07	1.03231e-09	5.70886e-11	-8.49715e-11	-1.59784e-10	-1.72638e-10	-1.59359e-10	-1.68764e-10
56	1.54664e-07	1.31966e-09	-1.6825e-10	-8.04095e-11	-1.59387e-10	3.10465e-10	3.06234e-07	1.42843e-09	1.10505e-10	-1.00436e-10	-1.72477e-10	-1.67251e-10	-1.67171e-10	-1.70009e-10
63	1.54555e-07	1.31141e-09	-1.64905e-10	-6.29129e-11	-1.67872e-10	3.23725e-10	3.05826e-07	1.91893e-09	1.89017e-10	-1.03221e-10	-1.59514e-10	-1.48719e-10	-1.74033e-10	-1.59989e-10
70	1.54461e-07	1.29884e-09	-1.56379e-10	-1.91101e-11	-1.44112e-10	3.33992e-10	3.05534e-07	2.31595e-09	2.26831e-10	-1.1058e-10	-1.5582e-10	-1.67632e-10	-1.60794e-10	-1.47652e-10
77	1.54456e-07	1.30677e-09	-1.63813e-10	6.85791e-12	-1.64957e-10	3.29004e-10	3.05115e-07	2.49493e-09	2.74075e-10	-1.08955e-10	-1.43566e-10	-1.39939e-10	-1.68562e-10	-1.64179e-10
84	1.54378e-07	1.29109e-09	-1.5868e-10	1.08353e-11	-1.38621e-10	3.50459e-10	3.05489e-07	2.53441e-09	2.90873e-10	-8.16201e-11	-1.41835e-10	-1.5304e-10	-1.59297e-10	-1.6554e-10
91	1.54381e-07	1.27743e-09	-1.51122e-10	8.15222e-14	-1.50231e-10	3.38703e-10	3.05019e-07	2.56642e-09	2.83668e-10	-9.09585e-11	-1.6206e-10	-1.65544e-10	-1.68687e-10	-1.25615e-10
98	1.54349e-07	1.28465e-09	-1.58218e-10	-2.78574e-11	-1.61445e-10	3.1795e-10	3.05261e-07	2.42817e-09	2.62216e-10	-9.40812e-11	-1.63982e-10	-1.46731e-10	-1.59636e-10	-1.66884e-10
105	1.54411e-07	1.3188e-09	-1.64167e-10	-1.69231e-11	-1.62024e-10	3.36472e-10	3.05454e-07	2.37987e-09	2.41031e-10	-8.82223e-11	-1.63088e-10	-1.53614e-10	-1.58974e-10	-1.41602e-10
112	1.54433e-07	1.30567e-09	-1.53305e-10	-3.0003e-11	-1.5009e-10	3.3669e-10	3.05801e-07	2.26692e-09	2.44175e-10	-1.11219e-10	-1.6799e-10	-1.63749e-10	-1.58551e-10	-1.51939e-10
119	1.54448e-07	1.29691e-09	-1.52336e-10	-3.23536e-11	-1.60134e-10	3.48011e-10	3.06258e-07	2.18245e-09	2.44525e-10	-9.57385e-11	-1.66943e-10	-1.45976e-10	-1.57922e-10	-1.53516e-10
126	1.55337e-07	1.28759e-09	-1.51978e-10	-3.59487e-11	-1.57764e-10	3.28572e-10	3.08119e-07	2.1297e-09	2.2948e-10	-1.07822e-10	-1.60641e-10	-1.44542e-10	-1.6099e-10	-1.61199e-10
133	1.55782e-07	1.31941e-09	-1.68058e-10	-1.17072e-11	-1.44397e-10	3.47337e-10	3.08793e-07	2.03164e-09	2.22441e-10	-8.20703e-11	-1.7233e-10	-1.74406e-10	-1.65725e-10	-1.57073e-10
140	1.55972e-07	1.31195e-09	-1.56596e-10	-1.36805e-11	-1.39996e-10	3.31041e-10	3.08786e-07	1.96549e-09	2.05857e-10	-9.91255e-11	-1.59204e-10	-1.6111e-10	-1.5086e-10	-1.75915e-10
147	1.56095e-07	1.33721e-09	-1.68105e-10	-3.14463e-11	-1.61341e-10	3.30353e-10	3.09187e-07	1.89398e-09	2.23247e-10	-9.93029e-11	-1.50576e-10	-1.72703e-10	-1.6854e-10	-1.63968e-10
154	1.56187e-07	1.31402e-09	-1.54847e-10	-3.20997e-11	-1.35764e-10	3.60496e-10	3.09056e-07	1.8382e-09	1.91129e-10	-8.11404e-11	-1.64187e-10	-1.75046e-10	-1.57942e-10	-1.62785e-10
161	1.56207e-07	1.33173e-09	-1.56087e-10	-6.79282e-11	-1.53851e-10	3.43174e-10	3.09445e-07	1.8086e-09	1.7115e-10	-1.05299e-10	-1.71968e-10	-1.74929e-10	-1.44509e-10	-1.74796e-10
168	1.56225e-07	1.31493e-09	-1.50572e-10	-6.52312e-11	-1.45926e-10	3.45281e-10	3.09476e-07	1.72766e-09	1.61017e-10	-1.02113e-10	-1.71023e-10	-1.62544e-10	-1.63784e-10	-1.67857e-10
175	1.56307e-07	1.29634e-09	-1.58647e-10	-6.61567e-11	-1.53561e-10	3.55098e-10	3.09209e-07	1.68206e-09	1.69035e-10	-1.0124e-10	-1.54277e-10	-1.51525e-10	-1.53581e-10	-1.68009e-10
182	1.56359e-07	1.31977e-09	-1.63653e-10	-7.37818e-11	-1.54865e-10	3.37021e-10	3.09698e-07	1.61727e-09	1.44707e-10	-1.00844e-10	-1.58071e-10	-1.45572e-10	-1.55094e-10	-1.76143e-10
189	1.56419e-07	1.30153e-09	-1.62063e-10	-5.43303e-11	-1.52158e-10	3.51142e-10	3.09476e-07	1.59601e-09	1.57353e-10	-1.03274e-10	-1.58599e-10	-1.36197e-10	-1.60626e-10	-1.60225e-10
196	1.56339e-07	1.29998e-09	-1.63648e-10	-7.68452e-11	-1.50267e-10	3.61159e-10	3.08958e-07	1.52575e-09	1.51391e-10	-1.02532e-10	-1.65045e-10	-1.70534e-10	-1.75575e-10	-1.65434e-10
203	1.5526e-07	1.31652e-09	-1.71809e-10	-6.59782e-11	-1.56818e-10	3.34262e-10	3.06446e-07	1.51121e-09	1.47738e-10	-1.18556e-10	-1.49898e-10	-1.60029e-10	-1.65904e-10	-1.73401e-10
210	1.54683e-07	1.3148e-09	-1.28586e-10	-7.4323e-11	-1.54572e-10	3.22273e-10	3.06204e-07	1.44583e-09	1.16404e-10	-8.84675e-11	-1.64126e-10	-1.69292e-10	-1.53182e-10	-1.5715e-10
217	1.54525e-07	1.31187e-09	-1.70338e-10	-8.08629e-11	-1.66017e-10	3.50631e-10	3.06004e-07	1.43689e-09	1.39961e-10	-8.46339e-11	-1.70688e-10	-1.69001e-10	-1.49495e-10	-1.58011e-10
224	1.54455e-07	1.31678e-09	-1.4457e-10	-8.08097e-11	-1.53193e-10	3.18107e-10	3.06088e-07	1.40251e-09	1.13992e-10	-1.08939e-10	-1.6148e-10	-1.59965e-10	-1.69393e-10	-1.5272e-10
231	1.5447e-07	1.28824e-09	-1.59623e-10	-8.60231e-11	-1.63466e-10	3.35399e-10	3.06135e-07	1.38342e-09	1.33291e-10	-1.0539e-10	-1.6063e-10	-1.52013e-10	-1.63894e-10	-1.52507e-10
238	1.54522e-07	1.31255e-09	-1.68125e-10	-6.11429e-11	-1.69344e-10	3.28809e-10	3.06016e-07	1.36149e-09	1.13636e-10	-9.00972e-11	-1.67377e-10	-1.58893e-10	-1.69891e-10	-1.73669e-10
245	1.54512e-07	1.33322e-09	-1.73735e-10	-1.06508e-10	-1.44539e-10	3.42961e-10	3.06617e-07	1.32636e-09	1.17787e-10	-1.0983e-10	-1.5738e-10	-1.60936e-10	-1.56593e-10	-1.70335e-10
252	1.54461e-07	1.29694e-09	-1.6243e-10	-8.27332e-11	-1.47879e-10	3.29735e-10	3.06166e-07	1.32257e-09	9.41788e-11	-9.7588e-11	-1.6716e-10	-1.65811e-10	-1.40782e-10	-1.64684e-10
259	1.54517e-07	1.326e-09	-1.38881e-10	-7.30861e-11	-1.47653e-10	3.19769e-10	3.06868e-07	1.2931e-09	1.37835e-10	-1.02211e-10	-1.63099e-10	-1.65254e-10	-1.63274e-10	-1.64281e-10
266	1.54507e-07	1.29955e-09	-1.46733e-10	-7.00475e-11	-1.48837e-10	3.20385e-10	3.05963e-07	1.29957e-09	1.08995e-10	-9.35105e-11	-1.53414e-10	-1.69849e-10	-1.62735e-10	-1.73388e-10
273	1.54499e-07	1.33727e-09	-1.59074e-10	-8.82135e-11	-1.62829e-10	2.97505e-10	3.06358e-07	1.27289e-09	8.73047e-11	-7.23778e-11	-1.59821e-10	-1.56254e-10	-1.72961e-10	-1.77266e-10
280	1.54581e-07	1.30667e-09	-1.54661e-10	-7.75907e-11	-1.56208e-10	3.58525e-10	3.06578e-07	1.21966e-09	1.02814e-10	-1.10769e-10	-1.55625e-10	-1.64698e-10	-1.66457e-10	-1.43499e-10
287	1.54516e-07	1.30226e-09	-1.51113e-10	-9.05748e-11	-1.60103e-10	3.46691e-10	3.05881e-07	1.22038e-09	1.07177e-10	-1.0414e-10	-1.75808e-10	-1.56255e-10	-1.59786e-10	-1.68778e-10
294	1.54503e-07	1.31791e-09	-1.59214e-10	-9.20181e-11	-1.6278e-10	3.13688e-10	3.06878e-07	1.20884e-09	9.28096e-11	-1.1e-10	-1.62254e-10	-1.6713e-10	-1.48972e-10	-1.6275e-10
301	1.54538e-07	1.35883e-09	-1.59535e-10	-8.51604e-11	-1.52566e-10	3.09416e-10	3.06185e-07	1.21157e-09	9.88109e-11	-1.04805e-10	-1.56651e-10	-1.56135e-10	-1.72746e-10	-1.6313e-10
308	1.54564e-07	1.31027e-09	-1.3782e-10	-9.83564e-11	-1.57013e-10	3.59503e-10	3.06149e-07	1.18383e-09	1.19082e-10	-1.08633e-10	-1.58336e-10	-1.575e-10	-1.6499e-10	-1.71303e-10
315	1.54528e-07	1.32876e-09	-1.71208e-10	-8.98072e-11	-1.63776e-10	3.51231e-10	3.06297e-07	1.17812e-09	1.03155e-10	-9.61184e-11	-1.69083e-10	-1.55712e-10	-1.60993e-10	-1.61305e-10
322	1.54614e-07	1.32071e-09	-1.5996e-10	-1.00583e-10	-1.54042e-10	3.40215e-10	3.05988e-07	1.17919e-09	8.26528e-11	-1.02082e-10	-1.60962e-10	-1.62432e-10	-1.62513e-10	-1.36632e-10
329	1.54564e-07	1.30907e-09	-1.52713e-10	-8.74824e-11	-1.47905e-10	3.40588e-10	3.06524e-07	1.17703e-09	1.01981e-10	-8.84556e-11	-1.51794e-10	-1.37852e-10	-1.53544e-10	-1.72191e-10
336	1.54622e-07	1.32424e-09	-1.5134e-10	-8.07018e-11	-1.57347e-10	3.38547e-10	3.06188e-07	1.16456e-09	8.11719e-11	-9.31083e-11	-1.57549e-10	-1.58517e-10	-1.66468e-10	-1.55027e-10
343	1.54598e-07	1.30702e-09	-1.61053e-10	-8.68663e-11	-1.44263e-10	3.25676e-10	3.06744e-07	1.1169e-09	8.84607e-11	-8.59049e-11	-1.52933e-10	-1.63509e-10	-1.76426e-10	-1.69855e-10
350	1.54579e-07	1.3035e-09	-1.71943e-10	-7.99371e-11	-1.33708e-10	3.34256e-10	3.06599e-07	1.14924e-09	5.61454e-11	-1.04781e-10	-1.62215e-10	-1.68095e-10	-1.75138e-10	-1.72065e-10
357	1.54557e-07	1.30288e-09	-1.4828e-10	-1.05865e-10	-1.50779e-10	3.24846e-10	3.06157e-07	1.09544e-09	9.60057e-11	-1.07716e-10	-1.51218e-10	-1.50631e-10	-1.67471e-10	-1.58719e-10
364	1.54532e-07	1.33107e-09	-1.42325e-10	-9.29989e-11	-1.51434e-10	3.59612e-10	3.06608e-07	1.11388e-09	9.2133e-11	-9.51672e-11	-1.57263e-10	-1.56626e-10	-1.65057e-10	-1.628e-10
371	1.54621e-07	1.29673e-09	-1.69546e-10	-1.00166e-10	-1.83035e-10	3.21801e-10	3.06201e-07	1.14819e-09	8.05805e-11	-9.8631e-11	-1.64794e-10	-1.61821e-10	-1.58648e-10	-1.73048e-10
378	1.54548e-07	1.31005e-09	-1.63343e-10	-9.57376e-11	-1.46924e-10	3.38128e-10	3.06069e-07	1.12123e-09	9.69336e-11	-1.21593e-10	-1.68426e-10	-1.64495e-10	-1.69054e-10	-1.70542e-10
385	1.54536e-07	1.30163e-09	-1.61281e-10	-9.10612e-11	-1.50842e-10	3.49363e-10	3.0607e-07	1.14309e-09	7.11773e-11	-8.91989e-11	-1.73815e-10	-1.67581e-10	-1.69412e-10	-1.59876e-10
392	1.54561e-07	1.30192e-09	-1.46782e-10	-1.02864e-10	-1.39109e-10	3.21349e-10	3.06173e-07	1.16919e-09	8.44527e-11	-1.07767e-10	-1.64011e-10	-1.65559e-10	-1.61868e-10	-1.65353e-10
399	1.54473e-07	1.30665e-09	-1.55407e-10	-1.11148e-10	-1.45326e-10	3.10786e-10	3.06654e-07	1.07191e-09	7.46853e-11	-1.09899e-10	-1.67336e-10	-1.54146e-10	-1.74429e-10	-1.59183e-10
406	1.5456e-07	1.31612e-09	-1.76618e-10	-1.03404e-10	-1.58164e-10	3.53265e-10	3.06475e-07	1.10625e-09	8.76618e-11	-1.02898e-10	-1.4931e-10	-1.55478e-10	-1.8239e-10	-1.59367e-10
413	1.54569e-07	1.30706e-09	-1.66518e-10	-8.94839e-11	-1.54744e-10	3.2108e-10	3.06537e-07	1.11707e-09	7.34503e-11	-1.02824e-10	-1.65161e-10	-1.61216e-10	-1.46525e-10	-1.59948e-10
420	1.54565e-07	1.30602e-09	-1.60385e-10	-1.2605e-10	-1.69878e-10	3.3117e-10	3.06409e-07	1.12006e-09	9.03256e-11	-9.52622e-11	-1.62175e-10	-1.67385e-10	-1.69258e-10	-1.59392e-10
427	1.54617e-07	1.31017e-09	-1.42163e-10	-1.03863e-10	-1.52403e-10	3.34572e-10	3.06667e-07	1.07791e-09	6.16288e-11	-8.23519e-11	-1.63326e-10	-1.58045e-10	-1.5727e-10	-1.56093e-10
434	1.54534e-07	1.30987e-09	-1.53195e-10	-1.08697e-10	-1.55179e-10	3.47229e-10	3.06663e-07	1.10778e-09	9.44017e-11	-9.70243e-11	-1.62443e-10	-1.49335e-10	-1.48807e-10	-1.76102e-10
441	1.54602e-07	1.28189e-09	-1.51202e-10	-7.72378e-11	-1.4287e-10	3.42783e-10	3.06152e-07	1.07142e-09	6.47903e-11	-1.13208e-10	-1.73931e-10	-1.62763e-10	-1.56369e-10	-1.57805e-10
448	1.54536e-07	1.30879e-09	-1.4788e-10	-9.85201e-11	-1.42648e-10	3.25794e-10	3.068e-07	1.09024e-09	8.00953e-11	-1.0398e-10	-1.63225e-10	-1.69168e-10	-1.63103e-10	-1.62225e-10
455	1.54563e-07	1.33287e-09	-1.49356e-10	-9.19915e-11	-1.51384e-10	3.43474e-10	3.06292e-07	1.1299e-09	6.51283e-11	-1.05362e-10	-1.54044e-10	-1.74487e-10	-1.70753e-10	-1.71599e-10
462	1.54537e-07	1.26574e-09	-1.59939e-10	-8.68121e-11	-1.55119e-10	3.38306e-10	3.06476e-07	1.07998e-09	1.01916e-10	-1.08258e-10	-1.72108e-10	-1.59286e-10	-1.64665e-10	-1.63132e-10
469	1.5459e-07	1.28456e-09	-1.58069e-10	-9.01541e-11	-1.3424e-10	3.28111e-10	3.06483e-07	1.0798e-09	7.58742e-11	-9.97675e-11	-1.63683e-10	-1.66947e-10	-1.70211e-10	-1.79652e-10
476	1.54535e-07	1.32786e-09	-1.69819e-10	-1.04732e-10	-1.58259e-10	3.0927e-10	3.06135e-07	1.08811e-09	6.8001e-11	-9.67871e-11	-1.68871e-10	-1.56752e-10	-1.5778e-10	-1.64488e-10
483	1.54586e-07	1.34081e-09	-1.58446e-10	-1.06426e-10	-1.59665e-10	3.49124e-10	3.06486e-07	1.07053e-09	8.52163e-11	-9.86597e-11	-1.67958e-10	-1.67838e-10	-1.53288e-10	-1.38756e-10
490	1.54502e-07	1.35853e-09	-1.65841e-10	-8.66415e-11	-1.58258e-10	3.27814e-10	3.05944e-07	1.08706e-09	6.0086e-11	-1.12544e-10	-1.70633e-10	-1.57765e-10	-1.64857e-10	-1.50954e-10
497	1.5453e-07	1.30426e-09	-1.67263e-10	-8.75144e-11	-1.59624e-10	3.20575e-10	3.06528e-07	1.05467e-09	7.46109e-11	-1.00661e-10	-1.7471e-10	-1.65502e-10	-1.83872e-10	-1.70989e-10
504	1.54618e-07	1.31792e-09	-1.60258e-10	-1.1089e-10	-1.56728e-10	3.36602e-10	3.06479e-07	1.07299e-09	9.12746e-11	-9.95756e-11	-1.4535e-10	-1.65687e-10	-1.688e-10	-1.42972e-10
511	1.54593e-07	1.34139e-09	-1.58419e-10	-1.08173e-10	-1.54651e-10	3.20707e-10	3.06393e-07	1.07003e-09	7.60224e-11	-1.10881e-10	-1.58693e-10	-1.65958e-10	-1.61803e-10	-1.72367e-10
518	1.5457e-07	1.31467e-09	-1.4408e-10	-9.66132e-11	-1.53355e-10	3.08285e-10	3.06587e-07	1.05778e-09	7.37017e-11	-1.02941e-10	-1.68364e-10	-1.63984e-10	-1.66374e-10	-1.57438e-10
525	1.54544e-07	1.27819e-09	-1.56475e-10	-1.0811e-10	-1.49556e-10	3.445e-10	3.06151e-07	1.04908e-09	6.25019e-11	-1.06916e-10	-1.65572e-10	-1.55939e-10	-1.58057e-10	-1.56056e-10
532	1.54578e-07	1.3412e-09	-1.65769e-10	-1.07002e-10	-1.57159e-10	3.19493e-10	3.06673e-07	1.04839e-09	7.10911e-11	-1.0711e-10	-1.65478e-10	-1.58581e-10	-1.63785e-10	-1.64321e-10
539	1.54533e-07	1.32218e-09	-1.58708e-10	-9.7426e-11	-1.5276e-10	3.09733e-10	3.06373e-07	1.08878e-09	6.75233e-11	-1.07397e-10	-1.58121e-10	-1.55952e-10	-1.51539e-10	-1.51113e-10
546	1.54643e-07	1.30599e-09	-1.65325e-10	-9.81986e-11	-1.64489e-10	3.22726e-10	3.06054e-07	1.07265e-09	8.07629e-11	-9.36858e-11	-1.5419e-10	-1.49492e-10	-1.64061e-10	-1.66795e-10
553	1.54661e-07	1.34429e-09	-1.66979e-10	-9.45127e-11	-1.67424e-10	3.38549e-10	3.06704e-07	1.07024e-09	8.35119e-11	-1.05563e-10	-1.58303e-10	-1.4022e-10	-1.61825e-10	-1.58258e-10
560	1.54574e-07	1.30478e-09	-1.76153e-10	-9.6561e-11	-1.45185e-10	3.11326e-10	3.06251e-07	1.03888e-09	7.27038e-11	-1.01604e-10	-1.54644e-10	-1.82192e-10	-1.61711e-10	-1.57795e-10
567	1.54619e-07	1.31423e-09	-1.62013e-10	-9.61875e-11	-1.62239e-10	3.33875e-10	3.06483e-07	1.06027e-09	7.54903e-11	-9.68658e-11	-1.50044e-10	-1.57433e-10	-1.6943e-10	-1.59867e-10
574	1.54589e-07	1.29563e-09	-1.37372e-10	-1.0676e-10	-1.59622e-10	2.9912e-10	3.06723e-07	1.06729e-09	6.90925e-11	-1.05117e-10	-1.69268e-10	-1.64174e-10	-1.64704e-10	-1.66873e-10
581	1.54658e-07	1.31876e-09	-1.61078e-10	-1.05842e-10	-1.65318e-10	3.19502e-10	3.06323e-07	1.04207e-09	8.2583e-11	-1.01488e-10	-1.45074e-10	-1.50142e-10	-1.57672e-10	-1.68449e-10
588	1.54628e-07	1.29006e-09	-1.60567e-10	-9.59693e-11	-1.62053e-10	3.4268e-10	3.06354e-07	1.06555e-09	5.44342e-11	-1.19851e-10	-1.5399e-10	-1.57181e-10	-1.63851e-10	-1.7062e-10
595	1.54671e-07	1.3232e-09	-1.60321e-10	-1.04441e-10	-1.5959e-10	3.38206e-10	3.06861e-07	1.06849e-09	4.91905e-11	-1.1028e-10	-1.61066e-10	-1.62088e-10	-1.6248e-10	-1.61195e-10
602	1.54674e-07	1.32626e-09	-1.72956e-10	-8.48454e-11	-1.6973e-10	3.18461e-10	3.06225e-07	1.06514e-09	7.0881e-11	-1.05727e-10	-1.59835e-10	-1.53332e-10	-1.72765e-10	-1.62147e-10
609	1.54815e-07	1.31716e-09	-1.58021e-10	-9.29147e-11	-1.60348e-10	3.26653e-10	3.06907e-07	1.05117e-09	4.56439e-11	-1.1224e-10	-1.70606e-10	-1.40289e-10	-1.65136e-10	-1.71254e-10
616	1.54672e-07	1.31198e-09	-1.56796e-10	-1.04507e-10	-1.70659e-10	3.3297e-10	3.06646e-07	1.06282e-09	9.41654e-11	-1.1202e-10	-1.58099e-10	-1.56257e-10	-1.44414e-10	-1.6718e-10
623	1.54718e-07	1.31102e-09	-1.46122e-10	-8.88438e-11	-1.58542e-10	3.47593e-10	3.06279e-07	1.09007e-09	4.59401e-11	-1.0126e-10	-1.65157e-10	-1.57175e-10	-1.7187e-10	-1.48447e-10
630	1.54707e-07	1.32913e-09	-1.72095e-10	-1.09727e-10	-1.66225e-10	3.38801e-10	3.06654e-07	1.07181e-09	8.48187e-11	-1.07509e-10	-1.6783e-10	-1.6706e-10	-1.4926e-10	-1.62995e-10
637	1.54694e-07	1.31256e-09	-1.56333e-10	-1.19175e-10	-1.70123e-10	3.44633e-10	3.06523e-07	1.06586e-09	6.85988e-11	-9.9462e-11	-1.73079e-10	-1.65988e-10	-1.69755e-10	-1.62112e-10
644	1.54732e-07	1.33397e-09	-1.75349e-10	-7.52579e-11	-1.62431e-10	3.16216e-10	3.06247e-07	1.08343e-09	5.63034e-11	-8.7638e-11	-1.68362e-10	-1.6913e-10	-1.46315e-10	-1.47492e-10
651	1.54684e-07	1.30178e-09	-1.56443e-10	-9.6739e-11	-1.52239e-10	3.35552e-10	3.06955e-07	1.06436e-09	6.66387e-11	-1.02508e-10	-1.54828e-10	-1.65029e-10	-1.73335e-10	-1.67096e-10
658	1.5466e-07	1.33732e-09	-1.64546e-10	-1.05738e-10	-1.53028e-10	3.36701e-10	3.06021e-07	1.05421e-09	8.10735e-11	-1.01455e-10	-1.55604e-10	-1.58759e-10	-1.75716e-10	-1.54926e-10
665	1.5466e-07	1.30287e-09	-1.67618e-10	-8.39888e-11	-1.55296e-10	3.43473e-10	3.06239e-07	1.06641e-09	7.91557e-11	-8.84624e-11	-1.71478e-10	-1.61075e-10	-1.7071e-10	-1.70162e-10
672	1.54617e-07	1.31795e-09	-1.49229e-10	-9.28717e-11	-1.41799e-10	3.30368e-10	3.06835e-07	1.05553e-09	8.07788e-11	-1.12177e-10	-1.46972e-10	-1.72404e-10	-1.71253e-10	-1.67916e-10
679	1.54666e-07	1.31497e-09	-1.62623e-10	-9.34249e-11	-1.49439e-10	3.07158e-10	3.06437e-07	1.03901e-09	5.65895e-11	-1.00615e-10	-1.70896e-10	-1.42373e-10	-1.67782e-10	-1.71516e-10
686	1.54566e-07	1.30822e-09	-1.5402e-10	-1.02121e-10	-1.55951e-10	3.42935e-10	3.06263e-07	1.06029e-09	5.94355e-11	-9.89416e-11	-1.62019e-10	-1.62143e-10	-1.73956e-10	-1.42047e-10
693	1.54611e-07	1.31938e-09	-1.5619e-10	-1.12732e-10	-1.62627e-10	3.45827e-10	3.06444e-07	1.05788e-09	7.49322e-11	-1.00435e-10	-1.68401e-10	-1.6547e-10	-1.62138e-10	-1.66025e-10
700	1.54687e-07	1.33033e-09	-1.71703e-10	-1.04709e-10	-1.64435e-10	3.55249e-10	3.06468e-07	1.02363e-09	5.70847e-11	-8.42835e-11	-1.53577e-10	-1.70576e-10	-1.61756e-10	-1.6965e-10
707	1.54652e-07	1.31372e-09	-1.59577e-10	-8.14388e-11	-1.66283e-10	3.20934e-10	3.06783e-07	1.06563e-09	6.7601e-11	-1.17858e-10	-1.72882e-10	-1.51938e-10	-1.56008e-10	-1.77181e-10
714	1.54614e-07	1.3357e-09	-1.51385e-10	-8.97462e-11	-1.46217e-10	3.47017e-10	3.06503e-07	1.02833e-09	6.22262e-11	-1.14386e-10	-1.66933e-10	-1.68805e-10	-1.50518e-10	-1.68676e-10
721	1.54633e-07	1.30228e-09	-1.64046e-10	-9.52749e-11	-1.63611e-10	3.34609e-10	3.06179e-07	1.02932e-09	7.48564e-11	-9.91011e-11	-1.60787e-10	-1.7146e-10	-1.64339e-10	-1.66488e-10
728	1.54654e-07	1.31629e-09	-1.5135e-10	-9.12613e-11	-1.45673e-10	3.1705e-10	3.06879e-07	1.04583e-09	8.85357e-11	-1.07335e-10	-1.57353e-10	-1.66416e-10	-1.75442e-10	-1.63321e-10
735	1.54623e-07	1.3269e-09	-1.60421e-10	-1.07364e-10	-1.48374e-10	3.03383e-10	3.06483e-07	1.06182e-09	6.84975e-11	-9.93716e-11	-1.66251e-10	-1.65802e-10	-1.75751e-10	-1.80047e-10
742	1.54578e-07	1.31566e-09	-1.55915e-10	-9.7901e-11	-1.54489e-10	3.11472e-10	3.06324e-07	1.04806e-09	8.95119e-11	-1.12862e-10	-1.72245e-10	-1.68255e-10	-1.51552e-10	-1.65338e-10
749	1.54594e-07	1.29853e-09	-1.6508e-10	-1.15564e-10	-1.54667e-10	3.10749e-10	3.06658e-07	1.06462e-09	6.92372e-11	-1.03662e-10	-1.71391e-10	-1.70923e-10	-1.668e-10	-1.60016e-10
756	1.54574e-07	1.31662e-09	-1.55821e-10	-1.06014e-10	-1.64871e-10	3.42666e-10	3.06148e-07	1.05351e-09	7.34292e-11	-1.02745e-10	-1.61921e-10	-1.59857e-10	-1.6876e-10	-1.56177e-10
763	1.54595e-07	1.34005e-09	-1.54197e-10	-1.15773e-10	-1.57995e-10	3.22569e-10	3.06594e-07	1.03883e-09	6.06849e-11	-9.80333e-11	-1.6885e-10	-1.67268e-10	-1.66367e-10	-1.6167e-10
770	1.5456e-07	1.34223e-09	-1.50867e-10	-1.1e-10	-1.53606e-10	3.35103e-10	3.06417e-07	1.02974e-09	5.60551e-11	-1.20136e-10	-1.5832e-10	-1.74541e-10	-1.62447e-10	-1.63715e-10
777	1.54586e-07	1.33503e-09	-1.58874e-10	-1.0978e-10	-1.5683e-10	3.27703e-10	3.06e-07	1.06752e-09	7.68236e-11	-1.12406e-10	-1.68468e-10	-1.49777e-10	-1.56339e-10	-1.83123e-10
784	1.54582e-07	1.31752e-09	-1.48206e-10	-1.05056e-10	-1.44377e-10	3.13321e-10	3.06595e-07	1.0439e-09	6.1385e-11	-8.50727e-11	-1.74503e-10	-1.73471e-10	-1.52123e-10	-1.5794e-10
791	1.54561e-07	1.30747e-09	-1.516e-10	-8.89037e-11	-1.63961e-10	3.38232e-10	3.05782e-07	1.06009e-09	4.70228e-11	-1.17072e-10	-1.64284e-10	-1.7089e-10	-1.58513e-10	-1.71979e-10
798	1.54524e-07	1.32068e-09	-1.55399e-10	-1.05243e-10	-1.58597e-10	3.25715e-10	3.06502e-07	1.06813e-09	7.14808e-11	-9.67034e-11	-1.57995e-10	-1.79003e-10	-1.7576e-10	-1.74358e-10
805	1.5462e-07	1.29674e-09	-1.64706e-10	-1.00418e-10	-1.69752e-10	3.28358e-10	3.06654e-07	1.04316e-09	6.09663e-11	-1.01914e-10	-1.5197e-10	-1.58686e-10	-1.57675e-10	-1.70039e-10
812	1.54562e-07	1.3264e-09	-1.61546e-10	-9.95791e-11	-1.5618e-10	3.39466e-10	3.06306e-07	1.1002e-09	6.48336e-11	-1.05105e-10	-1.65244e-10	-1.64082e-10	-1.59384e-10	-1.72211e-10
819	1.54574e-07	1.32567e-09	-1.59099e-10	-8.48256e-11	-1.74656e-10	3.31766e-10	3.06466e-07	1.04812e-09	6.97314e-11	-1.18868e-10	-1.7283e-10	-1.71254e-10	-1.63583e-10	-1.78516e-10
826	1.54574e-07	1.33975e-09	-1.63368e-10	-9.72823e-11	-1.53242e-10	3.29593e-10	3.06098e-07	1.07318e-09	8.50916e-11	-1.02454e-10	-1.56091e-10	-1.56888e-10	-1.7234e-10	-1.61304e-10
833	1.54511e-07	1.34244e-09	-1.68071e-10	-1.06699e-10	-1.66766e-10	3.24025e-10	3.06132e-07	1.05178e-09	7.99317e-11	-1.00546e-10	-1.65788e-10	-1.77692e-10	-1.66603e-10	-1.54462e-10
840	1.54563e-07	1.30541e-09	-1.57864e-10	-1.1171e-10	-1.66404e-10	3.15306e-10	3.06746e-07	1.06714e-09	7.66789e-11	-1.10629e-10	-1.66989e-10	-1.6235e-10	-1.70974e-10	-1.71667e-10
847	1.54598e-07	1.32038e-09	-1.61353e-10	-1.1957e-10	-1.60796e-10	3.21607e-10	3.06092e-07	1.03511e-09	4.40043e-11	-8.05424e-11	-1.50889e-10	-1.67196e-10	-1.61829e-10	-1.51628e-10
854	1.54592e-07	1.33828e-09	-1.66459e-10	-9.76526e-11	-1.61965e-10	3.36373e-10	3.06583e-07	1.06619e-09	6.4331e-11	-1.01588e-10	-1.56954e-10	-1.74584e-10	-1.57719e-10	-1.5479e-10
861	1.54569e-07	1.32612e-09	-1.503e-10	-1.02905e-10	-1.72718e-10	3.13121e-10	3.06362e-07	1.06728e-09	4.74968e-11	-9.85914e-11	-1.59513e-10	-1.57146e-10	-1.63809e-10	-1.51325e-10
868	1.54599e-07	1.33151e-09	-1.60893e-10	-9.90671e-11	-1.42999e-10	3.08506e-10	3.06166e-07	1.07641e-09	7.11661e-11	-9.65654e-11	-1.68844e-10	-1.60546e-10	-1.66719e-10	-1.74676e-10
875	1.54538e-07	1.34812e-09	-1.86688e-10	-9.84502e-11	-1.42412e-10	3.05411e-10	3.06362e-07	1.06687e-09	5.24693e-11	-1.09745e-10	-1.66199e-10	-1.69434e-10	-1.55694e-10	-1.66897e-10
882	1.54554e-07	1.32997e-09	-1.69954e-10	-1.04242e-10	-1.54949e-10	3.43696e-10	3.05876e-07	1.07791e-09	7.97996e-11	-1.01944e-10	-1.65396e-10	-1.50101e-10	-1.49664e-10	-1.70759e-10
889	1.54511e-07	1.3418e-09	-1.74184e-10	-1.0228e-10	-1.50002e-10	3.22192e-10	3.06202e-07	1.07788e-09	5.3617e-11	-1.12899e-10	-1.69061e-10	-1.62301e-10	-1.51682e-10	-1.73302e-10
896	1.54516e-07	1.31066e-09	-1.62425e-10	-1.01123e-10	-1.55184e-10	3.30869e-10	3.06323e-07	1.05838e-09	7.72183e-11	-1.07637e-10	-1.69464e-10	-1.60169e-10	-1.71979e-10	-1.62486e-10
903	1.54567e-07	1.33225e-09	-1.72063e-10	-1.03774e-10	-1.61304e-10	3.20918e-10	3.05767e-07	1.02718e-09	7.14328e-11	-9.41097e-11	-1.64317e-10	-1.72023e-10	-1.65799e-10	-1.65886e-10
910	1.54506e-07	1.3209e-09	-1.66521e-10	-9.25305e-11	-1.61548e-10	3.39745e-10	3.06668e-07	1.06147e-09	5.93548e-11	-1.14901e-10	-1.71623e-10	-1.63724e-10	-1.65831e-10	-1.7263e-10
917	1.54562e-07	1.30199e-09	-1.54202e-10	-1.02849e-10	-1.73468e-10	3.20989e-10	3.06571e-07	1.04695e-09	9.62874e-11	-1.20618e-10	-1.63974e-10	-1.71777e-10	-1.52988e-10	-1.52766e-10
924	1.54633e-07	1.32785e-09	-1.53728e-10	-9.38508e-11	-1.56318e-10	3.26162e-10	3.07058e-07	1.04261e-09	7.38151e-11	-1.19782e-10	-1.63999e-10	-1.61928e-10	-1.59504e-10	-1.60843e-10
931	1.54585e-07	1.32585e-09	-1.6744e-10	-1.01284e-10	-1.6322e-10	3.23983e-10	3.06616e-07	1.05929e-09	6.80089e-11	-1.17178e-10	-1.60593e-10	-1.5906e-10	-1.61429e-10	-1.67675e-10
938	1.54574e-07	1.33187e-09	-1.49588e-10	-1.01568e-10	-1.63128e-10	3.23469e-10	3.06252e-07	1.03156e-09	4.68353e-11	-1.10077e-10	-1.75657e-10	-1.63485e-10	-1.63363e-10	-1.70914e-10
945	1.54616e-07	1.32558e-09	-1.6387e-10	-1.12145e-10	-1.6995e-10	3.10839e-10	3.06553e-07	1.03254e-09	6.05742e-11	-9.47399e-11	-1.78424e-10	-1.60017e-10	-1.64601e-10	-1.79464e-10
952	1.54567e-07	1.33124e-09	-1.64321e-10	-1.01827e-10	-1.53906e-10	3.16408e-10	3.06296e-07	1.06272e-09	6.2388e-11	-1.06906e-10	-1.6717e-10	-1.56611e-10	-1.6262e-10	-1.6919e-10
959	1.54595e-07	1.31835e-09	-1.52388e-10	-1.09656e-10	-1.42273e-10	3.16818e-10	3.06456e-07	1.05585e-09	8.17025e-11	-1.18524e-10	-1.76646e-10	-1.70729e-10	-1.62147e-10	-1.57728e-10
966	1.54604e-07	1.31712e-09	-1.64522e-10	-9.92823e-11	-1.58557e-10	3.29444e-10	3.06363e-07	1.04775e-09	6.57626e-11	-9.71695e-11	-1.63399e-10	-1.51887e-10	-1.67435e-10	-1.57846e-10
973	1.54619e-07	1.32716e-09	-1.67136e-10	-9.82351e-11	-1.39147e-10	3.12965e-10	3.06318e-07	1.06668e-09	5.85393e-11	-1.16256e-10	-1.64052e-10	-1.69297e-10	-1.59984e-10	-1.55707e-10
980	1.54595e-07	1.32846e-09	-1.61304e-10	-9.1269e-11	-1.50921e-10	3.2931e-10	3.06596e-07	1.06355e-09	6.45706e-11	-9.75957e-11	-1.48259e-10	-1.66759e-10	-1.58248e-10	-1.72485e-10
987	1.54617e-07	1.31119e-09	-1.73792e-10	-1.12337e-10	-1.63321e-10	3.12446e-10	3.06446e-07	1.0332e-09	6.72441e-11	-9.96039e-11	-1.67617e-10	-1.76396e-10	-1.73507e-10	-1.60288e-10
994	1.54563e-07	1.35948e-09	-1.60184e-10	-8.84458e-11	-1.54013e-10	3.01645e-10	3.0654e-07	1.04226e-09	8.67058e-11	-9.94384e-11	-1.64796e-10	-1.61024e-10	-1.64843e-10	-1.73066e-10
1001	1.5456e-07	1.33248e-09	-1.58434e-10	-1.16095e-10	-1.48462e-10	3.35526e-10	3.06889e-07	1.03596e-09	7.03726e-11	-1.08308e-10	-1.63595e-10	-1.8352e-10	-1.80621e-10	-1.60672e-10
1008	1.54616e-07	1.32909e-09	-1.58757e-10	-9.91526e-11	-1.42791e-10	3.22875e-10	3.06398e-07	1.06856e-09	4.59398e-11	-1.11867e-10	-1.6559e-10	-1.69548e-10	-1.59069e-10	-1.58912e-10
1015	1.54656e-07	1.33221e-09	-1.53846e-10	-1.01234e-10	-1.66028e-10	3.43475e-10	3.06728e-07	1.03464e-09	6.59615e-11	-1.08436e-10	-1.62159e-10	-1.64379e-10	-1.58419e-10	-1.63523e-10
1022	1.54618e-07	1.31257e-09	-1.64752e-10	-1.0514e-10	-1.50802e-10	3.18209e-10	3.0656e-07	1.05446e-09	7.61181e-11	-1.06931e-10	-1.44129e-10	-1.68812e-10	-1.63522e-10	-1.48243e-10
1029	1.54664e-07	1.32347e-09	-1.7089e-10	-1.04847e-10	-1.68227e-10	3.28555e-10	3.06557e-07	1.03994e-09	8.03384e-11	-1.01573e-10	-1.59797e-10	-1.62755e-10	-1.5477e-10	-1.6378e-10
1036	1.54604e-07	1.35378e-09	-1.68703e-10	-1.12222e-10	-1.58374e-10	3.40615e-10	3.06552e-07	1.05448e-09	4.67079e-11	-1.06853e-10	-1.63038e-10	-1.82772e-10	-1.55572e-10	-1.66106e-10
1043	1.54635e-07	1.30112e-09	-1.73418e-10	-9.55985e-11	-1.57264e-10	3.26813e-10	3.05997e-07	1.04268e-09	7.67948e-11	-1.19621e-10	-1.67822e-10	-1.71661e-10	-1.60639e-10	-1.75045e-10
1050	1.54638e-07	1.35607e-09	-1.76815e-10	-8.55557e-11	-1.54748e-10	3.37471e-10	3.06625e-07	1.05815e-09	5.49198e-11	-1.04331e-10	-1.61881e-10	-1.52194e-10	-1.81625e-10	-1.6611e-10
1057	1.54605e-07	1.32486e-09	-1.60916e-10	-1.01913e-10	-1.60798e-10	3.17668e-10	3.06074e-07	1.05806e-09	8.85465e-11	-1.09283e-10	-1.57318e-10	-1.6097e-10	-1.58642e-10	-1.65511e-10
1064	1.54591e-07	1.31622e-09	-1.65266e-10	-1.18254e-10	-1.53364e-10	3.27425e-10	3.06243e-07	1.06189e-09	6.6842e-11	-1.14666e-10	-1.58613e-10	-1.55398e-10	-1.5844e-10	-1.66102e-10
1071	1.54623e-07	1.29756e-09	-1.59722e-10	-1.15914e-10	-1.36011e-10	3.32565e-10	3.0673e-07	1.03942e-09	7.98192e-11	-9.10311e-11	-1.65058e-10	-1.71874e-10	-1.56119e-10	-1.61841e-10
1078	1.54607e-07	1.29965e-09	-1.60542e-10	-9.51774e-11	-1.6202e-10	3.2185e-10	3.06404e-07	1.03596e-09	5.29444e-11	-1.14426e-10	-1.78963e-10	-1.56009e-10	-1.73296e-10	-1.88738e-10
1085	1.54598e-07	1.34926e-09	-1.52698e-10	-1.14674e-10	-1.4764e-10	3.39527e-10	3.06522e-07	1.06772e-09	8.70346e-11	-1.04795e-10	-1.64965e-10	-1.89674e-10	-1.66354e-10	-1.61561e-10
1092	1.5456e-07	1.33007e-09	-1.66603e-10	-1.10663e-10	-1.51444e-10	3.02316e-10	3.06336e-07	1.07905e-09	7.34533e-11	-1.10521e-10	-1.7212e-10	-1.59811e-10	-1.73556e-10	-1.75971e-10
1099	1.54585e-07	1.33835e-09	-1.633e-10	-1.12267e-10	-1.55139e-10	3.35484e-10	3.06382e-07	1.06622e-09	7.03219e-11	-1.08626e-10	-1.50251e-10	-1.62899e-10	-1.5522e-10	-1.70361e-10
1106	1.54608e-07	1.32458e-09	-1.70724e-10	-9.87816e-11	-1.68209e-10	3.30733e-10	3.06457e-07	1.07083e-09	6.81942e-11	-1.12993e-10	-1.64215e-10	-1.58581e-10	-1.72535e-10	-1.70955e-10
1113	1.5457e-07	1.34377e-09	-1.53489e-10	-9.18082e-11	-1.49712e-10	3.23089e-10	3.06033e-07	1.06224e-09	8.86576e-11	-9.21931e-11	-1.6632e-10	-1.66813e-10	-1.53536e-10	-1.65837e-10
1120	1.54569e-07	1.32215e-09	-1.67556e-10	-9.57573e-11	-1.63759e-10	3.35029e-10	3.06394e-07	1.02592e-09	5.89005e-11	-9.58046e-11	-1.57496e-10	-1.73425e-10	-1.68004e-10	-1.73944e-10
1127	1.5457e-07	1.33072e-09	-1.68095e-10	-1.0938e-10	-1.48726e-10	3.33268e-10	3.06215e-07	1.04201e-09	5.32866e-11	-9.80582e-11	-1.61076e-10	-1.66339e-10	-1.64536e-10	-1.66324e-10
1134	1.54547e-07	1.32834e-09	-1.72943e-10	-1.04864e-10	-1.65822e-10	3.14274e-10	3.06225e-07	1.03613e-09	8.35627e-11	-1.05028e-10	-1.53089e-10	-1.71757e-10	-1.63141e-10	-1.78931e-10
1141	1.54509e-07	1.33179e-09	-1.64108e-10	-1.10877e-10	-1.53229e-10	3.14834e-10	3.06574e-07	1.07501e-09	5.7262e-11	-9.93592e-11	-1.60282e-10	-1.64411e-10	-1.65513e-10	-1.73123e-10
1148	1.54576e-07	1.33428e-09	-1.6113e-10	-1.01887e-10	-1.65321e-10	3.22872e-10	3.05766e-07	1.0709e-09	5.40954e-11	-1.14504e-10	-1.59211e-10	-1.65196e-10	-1.67474e-10	-1.75888e-10
1155	1.54568e-07	1.32008e-09	-1.65475e-10	-9.83722e-11	-1.56435e-10	3.25783e-10	3.06012e-07	1.0354e-09	6.17332e-11	-9.24135e-11	-1.78992e-10	-1.68252e-10	-1.82288e-10	-1.55571e-10
1162	1.54523e-07	1.32215e-09	-1.72372e-10	-1.0824e-10	-1.75782e-10	3.26508e-10	3.06261e-07	1.04612e-09	5.33424e-11	-9.5121e-11	-1.64963e-10	-1.50363e-10	-1.59104e-10	-1.60747e-10
1169	1.54605e-07	1.32523e-09	-1.55853e-10	-1.0838e-10	-1.60983e-10	3.02646e-10	3.06382e-07	1.07183e-09	8.03307e-11	-1.13444e-10	-1.88935e-10	-1.85147e-10	-1.56116e-10	-1.76526e-10
1176	1.54595e-07	1.32085e-09	-1.5446e-10	-9.62904e-11	-1.62489e-10	3.31357e-10	3.06846e-07	1.05761e-09	7.01344e-11	-9.42266e-11	-1.67406e-10	-1.63502e-10	-1.68582e-10	-1.82372e-10
1183	1.54558e-07	1.33559e-09	-1.59232e-10	-1.12809e-10	-1.65012e-10	3.49639e-10	3.05863e-07	1.05384e-09	5.80364e-11	-1.14377e-10	-1.74547e-10	-1.73829e-10	-1.61498e-10	-1.53628e-10
1190	1.54598e-07	1.31495e-09	-1.6946e-10	-1.06981e-10	-1.49247e-10	3.21909e-10	3.06571e-07	1.05669e-09	5.85359e-11	-1.18031e-10	-1.46957e-10	-1.66993e-10	-1.5896e-10	-1.52444e-10
1197	1.54629e-07	1.33483e-09	-1.69841e-10	-1.25555e-10	-1.50857e-10	3.15677e-10	3.06271e-07	1.0677e-09	5.90864e-11	-1.00797e-10	-1.77545e-10	-1.72239e-10	-1.70007e-10	-1.73341e-10
1204	1.54599e-07	1.3206e-09	-1.62382e-10	-1.21017e-10	-1.65771e-10	3.41773e-10	3.06454e-07	1.06358e-09	5.11287e-11	-1.08677e-10	-1.63679e-10	-1.72998e-10	-1.56248e-10	-1.61262e-10
1211	1.54575e-07	1.35335e-09	-1.73256e-10	-9.82769e-11	-1.6163e-10	3.28274e-10	3.06146e-07	1.06576e-09	5.37854e-11	-1.02765e-10	-1.56964e-10	-1.6846e-10	-1.77447e-10	-1.58484e-10
1218	1.54602e-07	1.3707e-09	-1.55933e-10	-1.02986e-10	-1.75915e-10	3.07434e-10	3.06066e-07	1.05586e-09	7.31097e-11	-1.10018e-10	-1.63648e-10	-1.75545e-10	-1.67175e-10	-1.41232e-10
1225	1.54609e-07	1.31747e-09	-1.59602e-10	-8.85984e-11	-1.62478e-10	3.08976e-10	3.06546e-07	1.06846e-09	6.11452e-11	-1.12633e-10	-1.5362e-10	-1.64873e-10	-1.58759e-10	-1.5611e-10
1232	1.54561e-07	1.31676e-09	-1.65431e-10	-1.03471e-10	-1.65499e-10	3.39478e-10	3.06094e-07	1.04753e-09	5.45366e-11	-7.16402e-11	-1.56294e-10	-1.58411e-10	-1.72132e-10	-1.81284e-10
1239	1.54579e-07	1.35972e-09	-1.62423e-10	-1.15864e-10	-1.55867e-10	3.28653e-10	3.06309e-07	1.04786e-09	5.53691e-11	-1.09003e-10	-1.73583e-10	-1.67277e-10	-1.67443e-10	-1.62857e-10
1246	1.54609e-07	1.34857e-09	-1.79639e-10	-1.01084e-10	-1.69944e-10	3.2269e-10	3.06223e-07	1.05454e-09	8.23691e-11	-1.29795e-10	-1.61455e-10	-1.59484e-10	-1.65242e-10	-1.78291e-10
1253	1.54584e-07	1.34834e-09	-1.62879e-10	-1.022e-10	-1.38839e-10	3.11589e-10	3.06325e-07	1.05549e-09	5.83341e-11	-1.10196e-10	-1.67451e-10	-1.72185e-10	-1.49432e-10	-1.74197e-10
1260	1.54608e-07	1.30562e-09	-1.58421e-10	-1.18563e-10	-1.50996e-10	3.07675e-10	3.06164e-07	1.08656e-09	6.9469e-11	-1.10481e-10	-1.69634e-10	-1.62398e-10	-1.72116e-10	-1.59412e-10
1267	1.54607e-07	1.31888e-09	-1.49046e-10	-1.07477e-10	-1.53777e-10	3.19634e-10	3.06689e-07	1.06984e-09	6.12186e-11	-1.12696e-10	-1.6187e-10	-1.61214e-10	-1.73662e-10	-1.59658e-10
1274	1.54626e-07	1.35656e-09	-1.46278e-10	-7.12759e-11	-1.64209e-10	3.31088e-10	3.0683e-07	1.06241e-09	4.89497e-11	-1.23757e-10	-1.63291e-10	-1.68372e-10	-1.71387e-10	-1.7062e-10
1281	1.5465e-07	1.3576e-09	-1.69543e-10	-1.00083e-10	-1.65535e-10	3.28247e-10	3.0634e-07	1.06408e-09	7.78338e-11	-1.16925e-10	-1.62415e-10	-1.63385e-10	-1.75647e-10	-1.75014e-10
1288	1.5461e-07	1.32855e-09	-1.59931e-10	-1.14787e-10	-1.59982e-10	3.12038e-10	3.06715e-07	1.04962e-09	6.64194e-11	-1.10865e-10	-1.58876e-10	-1.55272e-10	-1.77806e-10	-1.74276e-10
1295	1.5458e-07	1.34055e-09	-1.64149e-10	-1.09283e-10	-1.70243e-10	3.01453e-10	3.06316e-07	1.04136e-09	7.17199e-11	-1.12889e-10	-1.58202e-10	-1.79624e-10	-1.76464e-10	-1.61651e-10
1302	1.54658e-07	1.32024e-09	-1.65074e-10	-1.13977e-10	-1.66576e-10	3.28676e-10	3.06472e-07	1.04431e-09	6.06627e-11	-1.08226e-10	-1.62021e-10	-1.7717e-10	-1.70784e-10	-1.82624e-10
1309	1.54549e-07	1.3372e-09	-1.63132e-10	-1.02988e-10	-1.62486e-10	3.05677e-10	3.05924e-07	1.04709e-09	8.38806e-11	-9.79581e-11	-1.56721e-10	-1.74685e-10	-1.67318e-10	-1.58572e-10
1316	1.54502e-07	1.33277e-09	-1.55134e-10	-1.0778e-10	-1.64705e-10	3.12137e-10	3.0571e-07	1.06732e-09	6.65945e-11	-1.1351e-10	-1.45832e-10	-1.46888e-10	-1.79725e-10	-1.70557e-10
1323	1.54528e-07	1.34931e-09	-1.59997e-10	-1.15242e-10	-1.66035e-10	3.20686e-10	3.06009e-07	1.06067e-09	4.96825e-11	-9.77373e-11	-1.78561e-10	-1.81653e-10	-1.65755e-10	-1.69347e-10
1330	1.5452e-07	1.30858e-09	-1.55063e-10	-1.01293e-10	-1.53509e-10	3.39616e-10	3.05833e-07	1.03478e-09	7.11202e-11	-1.12672e-10	-1.51313e-10	-1.59039e-10	-1.63985e-10	-1.49136e-10
1337	1.54534e-07	1.32027e-09	-1.79426e-10	-9.05921e-11	-1.68764e-10	3.25227e-10	3.06262e-07	1.09316e-09	8.39835e-11	-1.26815e-10	-1.8134e-10	-1.69929e-10	-1.66726e-10	-1.57622e-10
1344	1.54545e-07	1.33874e-09	-1.52221e-10	-9.76222e-11	-1.67112e-10	3.2198e-10	3.05967e-07	1.06536e-09	8.66674e-11	-1.02076e-10	-1.7249e-10	-1.76714e-10	-1.71977e-10	-1.62567e-10
1351	1.54521e-07	1.34536e-09	-1.64191e-10	-1.05668e-10	-1.60874e-10	3.19272e-10	3.05877e-07	1.06551e-09	5.90933e-11	-1.11164e-10	-1.59636e-10	-1.7572e-10	-1.71201e-10	-1.61869e-10
1358	1.54515e-07	1.33165e-09	-1.56068e-10	-1.06559e-10	-1.64711e-10	3.15382e-10	3.06239e-07	1.08188e-09	7.43757e-11	-1.11696e-10	-1.66016e-10	-1.77739e-10	-1.64897e-10	-1.75199e-10
1365	1.54507e-07	1.36979e-09	-1.65205e-10	-9.78071e-11	-1.64242e-10	3.38263e-10	3.05779e-07	1.02821e-09	6.34775e-11	-1.06097e-10	-1.71864e-10	-1.73091e-10	-1.72731e-10	-1.76495e-10
1372	1.54508e-07	1.34107e-09	-1.62803e-10	-1.1848e-10	-1.56568e-10	3.38235e-10	3.06586e-07	1.04919e-09	5.12638e-11	-1.14791e-10	-1.71041e-10	-1.73428e-10	-1.54717e-10	-1.62742e-10
1379	1.54535e-07	1.33605e-09	-1.42195e-10	-1.11125e-10	-1.57661e-10	3.09671e-10	3.05839e-07	1.02586e-09	5.30632e-11	-1.04049e-10	-1.65585e-10	-1.63826e-10	-1.70461e-10	-1.82473e-10
1386	1.54663e-07	1.33458e-09	-1.64232e-10	-1.10068e-10	-1.51203e-10	3.44062e-10	3.06383e-07	1.05681e-09	8.68492e-11	-1.07257e-10	-1.7457e-10	-1.81673e-10	-1.77778e-10	-1.67615e-10
1393	1.54556e-07	1.3134e-09	-1.65318e-10	-8.7893e-11	-1.51591e-10	3.08684e-10	3.06051e-07	1.06521e-09	6.3604e-11	-1.0754e-10	-1.65603e-10	-1.66966e-10	-1.75379e-10	-1.71117e-10
1400	1.54525e-07	1.32886e-09	-1.70989e-10	-1.0236e-10	-1.55711e-10	2.95906e-10	3.06173e-07	1.05257e-09	6.17439e-11	-1.03004e-10	-1.76243e-10	-1.55673e-10	-1.75471e-10	-1.72175e-10
1407	1.54511e-07	1.35214e-09	-1.69889e-10	-1.13916e-10	-1.66794e-10	3.01391e-10	3.06298e-07	1.03855e-09	8.29017e-11	-1.0838e-10	-1.71243e-10	-1.61653e-10	-1.70204e-10	-1.66717e-10
1414	1.54563e-07	1.3268e-09	-1.71074e-10	-1.06877e-10	-1.65552e-10	3.24019e-10	3.05898e-07	1.04929e-09	6.77494e-11	-9.82007e-11	-1.59198e-10	-1.58491e-10	-1.69598e-10	-1.71712e-10
1421	1.54593e-07	1.35869e-09	-1.57037e-10	-1.11522e-10	-1.52084e-10	2.97409e-10	3.06395e-07	1.04369e-09	3.20111e-11	-1.05029e-10	-1.57691e-10	-1.69501e-10	-1.54799e-10	-1.68717e-10
1428	1.54563e-07	1.32837e-09	-1.67835e-10	-1.03179e-10	-1.49305e-10	3.52581e-10	3.06352e-07	1.07757e-09	7.15419e-11	-1.09531e-10	-1.61873e-10	-1.60246e-10	-1.62121e-10	-1.79803e-10
1435	1.54569e-07	1.31475e-09	-1.64226e-10	-9.87913e-11	-1.57522e-10	3.19013e-10	3.05942e-07	1.0416e-09	6.54762e-11	-9.27037e-11	-1.659e-10	-1.51899e-10	-1.71431e-10	-1.77785e-10
1442	1.54561e-07	1.36905e-09	-1.69475e-10	-1.19151e-10	-1.64654e-10	3.27513e-10	3.0675e-07	1.0609e-09	6.07566e-11	-1.1289e-10	-1.70789e-10	-1.69137e-10	-1.6461e-10	-1.66802e-10
1449	1.54551e-07	1.34157e-09	-1.68584e-10	-9.13957e-11	-1.50158e-10	3.348e-10	3.059e-07	1.0505e-09	6.28203e-11	-1.0802e-10	-1.73011e-10	-1.75363e-10	-1.77047e-10	-1.74784e-10
1456	1.54535e-07	1.3698e-09	-1.77333e-10	-9.53982e-11	-1.73393e-10	3.15289e-10	3.0625e-07	1.04072e-09	6.95148e-11	-1.18489e-10	-1.59369e-10	-1.46711e-10	-1.68474e-10	-1.66602e-10
1463	1.54553e-07	1.3361e-09	-1.76995e-10	-9.34821e-11	-1.77193e-10	3.31449e-10	3.05955e-07	1.04762e-09	5.80225e-11	-9.67522e-11	-1.66479e-10	-1.61004e-10	-1.76292e-10	-1.73423e-10
1470	1.54534e-07	1.33499e-09	-1.63985e-10	-9.20526e-11	-1.74241e-10	3.31288e-10	3.0592e-07	1.06303e-09	5.87572e-11	-1.16238e-10	-1.76316e-10	-1.60382e-10	-1.72796e-10	-1.66068e-10
1477	1.54522e-07	1.32721e-09	-1.70902e-10	-9.84388e-11	-1.78961e-10	3.09835e-10	3.06272e-07	1.06843e-09	5.5686e-11	-1.05006e-10	-1.62688e-10	-1.73815e-10	-1.78638e-10	-1.61693e-10
1484	1.54535e-07	1.33128e-09	-1.59278e-10	-1.00148e-10	-1.53937e-10	3.31319e-10	3.06027e-07	1.06166e-09	5.36187e-11	-1.27469e-10	-1.66815e-10	-1.588e-10	-1.70801e-10	-1.76153e-10
1491	1.54498e-07	1.33514e-09	-1.66766e-10	-1.13905e-10	-1.50668e-10	3.01824e-10	3.06548e-07	1.0638e-09	8.49367e-11	-1.25155e-10	-1.7458e-10	-1.64663e-10	-1.81145e-10	-1.49472e-10
1498	1.54474e-07	1.30746e-09	-1.74477e-10	-1.15822e-10	-1.41199e-10	3.06413e-10	3.06094e-07	1.06903e-09	4.46503e-11	-1.08171e-10	-1.58679e-10	-1.81945e-10	-1.73144e-10	-1.65629e-10
1505	1.54554e-07	1.31912e-09	-1.37874e-10	-8.52966e-11	-1.72171e-10	3.17754e-10	3.06294e-07	1.07183e-09	5.7088e-11	-9.89305e-11	-1.71596e-10	-1.57699e-10	-1.70563e-10	-1.71425e-10
1512	1.54537e-07	1.33947e-09	-1.60837e-10	-1.01589e-10	-1.65209e-10	2.92922e-10	3.06208e-07	1.04989e-09	4.711e-11	-9.26562e-11	-1.53189e-10	-1.6809e-10	-1.80587e-10	-1.65185e-10
1519	1.54485e-07	1.3456e-09	-1.58549e-10	-9.73301e-11	-1.70198e-10	3.17798e-10	3.06054e-07	1.05495e-09	5.44303e-11	-1.16373e-10	-1.61851e-10	-1.62904e-10	-1.71215e-10	-1.67611e-10
1526	1.54492e-07	1.35959e-09	-1.68762e-10	-1.15737e-10	-1.58193e-10	3.50211e-10	3.06338e-07	1.03227e-09	4.04722e-11	-9.85504e-11	-1.69071e-10	-1.59118e-10	-1.86631e-10	-1.86005e-10
1533	1.54578e-07	1.34872e-09	-1.43637e-10	-1.18569e-10	-1.68709e-10	3.40435e-10	3.06088e-07	1.07933e-09	4.79367e-11	-9.03273e-11	-1.7328e-10	-1.49506e-10	-1.82317e-10	-1.70049e-10
1540	1.54713e-07	1.31414e-09	-1.4424e-10	-1.05838e-10	-1.60425e-10	3.24187e-10	3.06659e-07	1.0441e-09	8.02269e-11	-1.11137e-10	-1.39242e-10	-1.70297e-10	-1.64933e-10	-1.75753e-10
1547	1.54646e-07	1.32051e-09	-1.57043e-10	-1.01747e-10	-1.64987e-10	3.36364e-10	3.06077e-07	1.0778e-09	5.81622e-11	-1.02821e-10	-1.74209e-10	-1.74663e-10	-1.70359e-10	-1.83207e-10
1554	1.54648e-07	1.36366e-09	-1.71543e-10	-9.711e-11	-1.57146e-10	3.14843e-10	3.06004e-07	1.06436e-09	6.75833e-11	-1.03568e-10	-1.65933e-10	-1.81882e-10	-1.80624e-10	-1.59884e-10

## Sheet: Table S3
Table S3. IRMS δ13C determination of CO2 in OAA decomposition experiments
OAA_1
Sample	δ13C
QMS_OAA_1_1	-20.182
QMS_OAA_1_2	-20.201
QMS_OAA_1_3	-20.249
QMS_OAA_1_4	-20.348
QMS_OAA_1_5	-20.413
QMS_OAA_1_6	-20.454
QMS_OAA_1_7	-20.557
QMS_OAA_1_8	-20.553
Average (1σ)	-20.37(15)
OAA_2
Sample	δ13C
QMS_OAA_2_1	-20.084
QMS_OAA_2_2	-19.937
QMS_OAA_2_3	-19.991
QMS_OAA_2_4	-20.023
QMS_OAA_2_5	-19.906
QMS_OAA_2_6	-19.983
QMS_OAA_2_7	-19.986
QMS_OAA_2_8	-19.984
QMS_OAA_2_9	-19.992
QMS_OAA_2_10	-20.443
Average (1σ)	-20.03(15)
OAA_3
Sample	δ13C
QMS_OAA_3_1	-19.854
QMS_OAA_3_2	-19.844
QMS_OAA_3_3	-19.867
QMS_OAA_3_4	-19.902
QMS_OAA_3_5	-19.883
QMS_OAA_3_6	-19.895
QMS_OAA_3_7	-19.934
QMS_OAA_3_8	-19.934
Average (1σ)	-19.89(3)
OAA_4
Sample	δ13C
QMS_OAA_4_1	-25.68
QMS_OAA_4_2	-25.637
QMS_OAA_4_3	-25.621
QMS_OAA_4_4	-25.603
QMS_OAA_4_5	-25.586
QMS_OAA_4_6	-25.639
QMS_OAA_4_7	-25.657
Average(1σ)	-25.63(3)
OAA_5
Sample	δ13C
QMS_OAA_5_1	-26.466
QMS_OAA_5_2	-26.518
QMS_OAA_5_3	-26.489
QMS_OAA_5_4	-26.495
QMS_OAA_5_5	-26.503
QMS_OAA_5_6	-26.333
QMS_OAA_5_7	-26.363
Average(1σ)	-26.45(7)

## Sheet: Table S4
Table S4. Raw data from QMS for organic matter pyrolysis experiments at 3 GPa, 700 °C, ΔFMQ = +0.8. Signal intensities are expressed in arbitrary units.
COH210 (total pressure = 0.011 bar, furnace T = 89.0 °C, initial reactor position = 6 mm)
Time (s)	Total signal intensity	m/z 2	m/z 64	m/z 12	m/z 13	m/z 14	m/z 15	m/z 18	m/z 43	m/z 28	m/z 29	m/z 32	m/z 44	m/z 45
0	1.04486e-07	3.24183e-09	-1.07905e-10	-8.39875e-11	-3.86698e-11	-5.62173e-11	-8.50498e-11	7.25551e-09	-1.07446e-10	2.04218e-09	-1.03973e-10	6.89974e-10	4.69802e-10	-1.08338e-10
7	1.03983e-07	3.0593e-09	-1.23162e-10	-6.46981e-11	-2.94946e-11	-4.68791e-11	-8.36463e-11	7.25269e-09	-1.09237e-10	2.06093e-09	-1.01156e-10	6.76482e-10	4.94989e-10	-1.07263e-10
14	1.04011e-07	3.04722e-09	-1.25674e-10	-7.24496e-11	-2.40533e-11	-5.24745e-11	-8.60228e-11	7.18775e-09	-1.08681e-10	2.05681e-09	-1.17031e-10	6.82542e-10	4.71152e-10	-1.16147e-10
21	1.03903e-07	3.0165e-09	-1.13468e-10	-8.19675e-11	-2.83143e-11	-6.16761e-11	-8.11012e-11	7.25604e-09	-1.19262e-10	2.04345e-09	-9.85656e-11	6.6258e-10	5.06987e-10	-1.15526e-10
28	1.03339e-07	3.06014e-09	-1.18797e-10	-6.91239e-11	-3.08988e-11	-8.75896e-11	-7.55128e-11	7.01379e-09	-1.14343e-10	1.81244e-09	-1.03092e-10	6.19899e-10	4.85177e-10	-1.1945e-10
35	1.03534e-07	2.96112e-09	-1.16307e-10	-7.28361e-11	-3.09222e-11	-7.35412e-11	-8.77792e-11	7.03208e-09	-1.03054e-10	1.80502e-09	-9.56803e-11	6.30288e-10	4.93869e-10	-1.12325e-10
42	1.03487e-07	3.02478e-09	-1.14355e-10	-6.96205e-11	-3.06398e-11	-7.31369e-11	-8.17311e-11	6.96979e-09	-1.11442e-10	1.82227e-09	-1.05358e-10	6.27722e-10	4.9092e-10	-1.11692e-10
49	1.03556e-07	2.94728e-09	-1.12348e-10	-6.24541e-11	-3.78349e-11	-7.17961e-11	-7.72563e-11	7.0539e-09	-1.072e-10	1.81143e-09	-1.17285e-10	6.23473e-10	4.97091e-10	-1.06354e-10
56	1.03574e-07	3.00682e-09	-1.14025e-10	-7.05344e-11	-3.12525e-11	-5.77378e-11	-7.51689e-11	7.01188e-09	-1.30515e-10	2.05409e-09	-8.74361e-11	6.8385e-10	5.55824e-10	-9.51053e-11
63	1.03715e-07	3.1208e-09	-1.2321e-10	-5.38428e-11	-1.25858e-11	1.86346e-12	-7.41564e-11	7.08568e-09	-1.12658e-10	4.08387e-09	-7.35613e-11	9.35402e-10	1.85958e-09	-1.03415e-10
70	1.03657e-07	3.0402e-09	-1.21133e-10	2.91909e-11	-6.69633e-12	1.81951e-10	-8.67916e-11	7.62356e-09	-1.01305e-10	7.36205e-09	-5.23202e-11	1.10168e-09	6.35483e-09	-3.25117e-11
77	1.03399e-07	2.97559e-09	-1.18269e-10	2.18294e-10	-1.88138e-11	3.04019e-10	-7.35882e-11	8.57625e-09	-9.46192e-11	9.63757e-09	-4.31524e-11	1.1793e-09	1.05231e-08	8.30457e-12
84	1.03156e-07	3.04476e-09	-1.13447e-10	3.31432e-10	-2.51459e-11	3.64669e-10	-7.0466e-11	9.50857e-09	-9.90094e-11	1.05562e-08	-2.80734e-11	1.1803e-09	1.22699e-08	2.05047e-11
91	1.03184e-07	3.0673e-09	-1.16438e-10	3.60895e-10	-2.56046e-11	3.45335e-10	-7.87487e-11	1.02327e-08	-1.01501e-10	1.0569e-08	-3.81289e-11	1.2281e-09	1.23874e-08	4.00388e-11
98	1.0287e-07	3.09191e-09	-1.3184e-10	3.91959e-10	-5.33096e-12	3.37265e-10	-8.73401e-11	1.05978e-08	-8.93895e-11	1.0206e-08	-4.4753e-11	1.16682e-09	1.18803e-08	1.39796e-11
105	1.03085e-07	3.17933e-09	-1.14029e-10	3.64652e-10	1.47366e-12	3.15392e-10	-7.87858e-11	1.08867e-08	-1.08444e-10	9.72594e-09	-3.76914e-11	1.18593e-09	1.11502e-08	1.71236e-11
112	1.02988e-07	3.21587e-09	-1.19382e-10	3.18938e-10	-2.56748e-11	2.9653e-10	-8.96155e-11	1.09617e-08	-9.41516e-11	9.16255e-09	-4.00989e-11	1.15786e-09	1.03465e-08	-4.39304e-12
119	1.03158e-07	3.1541e-09	-1.17976e-10	2.85321e-10	-3.23335e-11	2.78364e-10	-8.68318e-11	1.09949e-08	-1.06303e-10	8.6233e-09	-4.92155e-11	1.12459e-09	9.59451e-09	8.64212e-12
126	1.03398e-07	3.22349e-09	-1.09126e-10	2.58122e-10	-1.11802e-11	2.50296e-10	-8.95019e-11	1.09782e-08	-1.10472e-10	8.16545e-09	-6.79435e-11	1.13674e-09	8.96153e-09	-2.12504e-11
133	1.036e-07	3.13516e-09	-1.13519e-10	2.53744e-10	-2.65544e-11	2.3972e-10	-7.62175e-11	1.09571e-08	-1.11499e-10	7.72093e-09	-4.45316e-11	1.09022e-09	8.34208e-09	-1.31891e-11
140	1.04277e-07	3.35519e-09	-1.22147e-10	2.40695e-10	-1.10274e-11	1.92279e-10	-8.96321e-11	1.08922e-08	-9.84956e-11	7.3111e-09	-7.36951e-11	1.05934e-09	7.76021e-09	-2.38354e-11
147	1.04525e-07	3.15229e-09	-1.20721e-10	2.01574e-10	1.11293e-11	1.77788e-10	-7.27008e-11	1.07984e-08	-1.06109e-10	6.94818e-09	-6.45911e-11	1.04436e-09	7.27605e-09	-4.32287e-11
154	1.04688e-07	3.10533e-09	-1.19445e-10	1.77803e-10	-2.35363e-11	1.79143e-10	-7.37846e-11	1.06583e-08	-1.02129e-10	6.58799e-09	-6.55661e-11	1.06642e-09	6.77336e-09	-3.68439e-11
161	1.04829e-07	3.14137e-09	-1.23726e-10	1.49714e-10	-2.48836e-11	1.50763e-10	-7.80939e-11	1.05702e-08	-1.18236e-10	6.26314e-09	-6.22616e-11	1.0068e-09	6.31213e-09	-4.26309e-11
168	1.0488e-07	3.13638e-09	-1.19449e-10	1.46669e-10	-1.45726e-11	1.45631e-10	-8.38348e-11	1.04454e-08	-1.04648e-10	5.97134e-09	-6.25534e-11	1.01915e-09	5.88359e-09	-4.95444e-11
175	1.04954e-07	3.13352e-09	-9.62199e-11	1.52499e-10	-2.58323e-11	1.27183e-10	-6.74941e-11	1.03551e-08	-1.15886e-10	5.68587e-09	-5.8126e-11	9.7631e-10	5.4994e-09	-5.42507e-11
182	1.05066e-07	3.10604e-09	-1.17178e-10	1.17242e-10	-2.76877e-11	1.16138e-10	-9.22667e-11	1.02079e-08	-1.0531e-10	5.40992e-09	-7.04917e-11	9.87437e-10	5.13894e-09	-5.0738e-11
189	1.05148e-07	3.10883e-09	-9.82398e-11	1.08662e-10	-1.76591e-11	7.81885e-11	-6.35377e-11	1.01143e-08	-1.0612e-10	5.14126e-09	-7.16395e-11	9.59892e-10	4.75145e-09	-5.78609e-11
196	1.05152e-07	3.12941e-09	-1.37982e-10	7.99573e-11	-3.15707e-11	7.62054e-11	-9.21731e-11	1.00059e-08	-1.26867e-10	4.9259e-09	-7.67776e-11	9.26851e-10	4.43878e-09	-7.57218e-11
203	1.05152e-07	3.07992e-09	-1.21567e-10	6.59307e-11	-2.23545e-11	6.43683e-11	-7.54689e-11	9.9195e-09	-1.0884e-10	4.72222e-09	-6.28104e-11	9.35683e-10	4.12507e-09	-8.20588e-11
210	1.04406e-07	3.11898e-09	-1.18188e-10	7.32744e-11	-2.79928e-11	4.58489e-11	-7.69683e-11	9.80694e-09	-1.04562e-10	4.52115e-09	-7.984e-11	8.91579e-10	3.89443e-09	-7.47405e-11
217	1.04235e-07	3.1302e-09	-1.18196e-10	6.38981e-11	-2.36369e-11	6.00346e-11	-6.73192e-11	9.68909e-09	-1.08629e-10	4.32914e-09	-7.73789e-11	8.95277e-10	3.62461e-09	-7.3675e-11
224	1.04301e-07	3.10805e-09	-1.15125e-10	6.39515e-11	-2.87708e-11	5.15632e-11	-9.11715e-11	9.61752e-09	-1.21006e-10	4.18896e-09	-9.17594e-11	8.83466e-10	3.36078e-09	-9.11789e-11
231	1.04246e-07	3.14096e-09	-1.08315e-10	2.56353e-11	-2.25305e-11	3.08595e-11	-8.13578e-11	9.49047e-09	-1.08459e-10	4.00736e-09	-8.35914e-11	8.82435e-10	3.14553e-09	-8.31471e-11
238	1.04279e-07	3.10777e-09	-1.22256e-10	4.80298e-11	-2.34372e-11	3.2848e-11	-7.72866e-11	9.43318e-09	-1.15429e-10	3.86512e-09	-9.27656e-11	8.5446e-10	2.95703e-09	-7.6624e-11
245	1.04232e-07	3.07123e-09	-1.11935e-10	7.70931e-12	-2.76591e-11	2.07354e-11	-9.6025e-11	9.30127e-09	-1.1378e-10	3.72785e-09	-7.86222e-11	8.64278e-10	2.77771e-09	-8.27081e-11
252	1.04238e-07	3.16627e-09	-1.17542e-10	1.55886e-11	-5.2711e-11	1.11266e-11	-6.82905e-11	9.2471e-09	-1.10946e-10	3.59446e-09	-1.01891e-10	8.47241e-10	2.61667e-09	-7.53533e-11
259	1.04239e-07	3.09587e-09	-1.01658e-10	-1.60276e-12	-3.34818e-13	1.2856e-11	-7.97912e-11	9.1097e-09	-1.22964e-10	3.485e-09	-9.05945e-11	8.37643e-10	2.45476e-09	-8.76469e-11
266	1.04285e-07	3.08473e-09	-1.23252e-10	1.18959e-11	-1.64117e-11	4.50205e-12	-7.05918e-11	9.04736e-09	-9.16464e-11	3.40818e-09	-8.00845e-11	8.16797e-10	2.32811e-09	-9.89973e-11
273	1.04311e-07	3.02725e-09	-1.06039e-10	-9.93409e-12	-1.33869e-11	-5.25058e-12	-6.82349e-11	9.01788e-09	-1.27417e-10	3.27018e-09	-8.74877e-11	8.22991e-10	2.20525e-09	-8.81382e-11
280	1.04274e-07	3.25445e-09	-1.12018e-10	1.42046e-12	3.9711e-12	1.23368e-11	-9.37046e-11	8.92403e-09	-1.01447e-10	3.2014e-09	-7.55875e-11	8.23115e-10	2.05478e-09	-9.06653e-11
287	1.04291e-07	3.06695e-09	-1.17043e-10	5.93949e-13	4.75731e-13	-1.80317e-11	-8.81771e-11	8.82998e-09	-1.12317e-10	3.11332e-09	-7.4186e-11	8.41039e-10	1.94437e-09	-9.86794e-11
294	1.04316e-07	3.04485e-09	-1.17291e-10	-2.77085e-11	-2.4357e-11	-1.67914e-11	-8.08761e-11	8.81215e-09	-1.23384e-10	3.06697e-09	-9.32883e-11	8.0332e-10	1.82697e-09	-8.22409e-11
301	1.04319e-07	3.01121e-09	-1.22311e-10	-1.30967e-11	2.71401e-12	-2.01357e-11	-8.54148e-11	8.71546e-09	-1.27396e-10	2.96948e-09	-7.61817e-11	8.07487e-10	1.75391e-09	-8.15117e-11
308	1.0429e-07	3.16927e-09	-1.13183e-10	-2.96684e-11	-3.13717e-11	-2.33121e-12	-8.25308e-11	8.67243e-09	-1.19647e-10	2.89695e-09	-8.08046e-11	7.81852e-10	1.65866e-09	-8.12334e-11
315	1.04293e-07	3.24786e-09	-1.24273e-10	-2.29496e-11	-2.02204e-11	-2.62077e-11	-8.07044e-11	8.61739e-09	-1.03214e-10	2.85084e-09	-1.0557e-10	7.86664e-10	1.59453e-09	-9.58773e-11
322	1.04285e-07	3.13553e-09	-1.08416e-10	-3.87241e-11	-3.4542e-11	-1.00873e-11	-8.94751e-11	8.53487e-09	-1.05932e-10	2.79078e-09	-8.18241e-11	7.9484e-10	1.49164e-09	-9.49472e-11
329	1.0428e-07	3.06111e-09	-1.03847e-10	-3.5411e-11	-3.25885e-11	-8.40379e-12	-7.37949e-11	8.49693e-09	-1.30735e-10	2.73652e-09	-7.93936e-11	8.04196e-10	1.42271e-09	-1.01599e-10
336	1.04308e-07	3.06161e-09	-1.22748e-10	-5.2931e-11	-9.78299e-12	-1.23762e-11	-9.1187e-11	8.47343e-09	-9.83976e-11	2.66056e-09	-7.99459e-11	7.76604e-10	1.34071e-09	-1.00456e-10
343	1.04285e-07	3.06677e-09	-1.06631e-10	-4.60646e-11	-2.96103e-11	-3.21269e-11	-9.39999e-11	8.39663e-09	-1.20732e-10	2.65958e-09	-9.92643e-11	7.79363e-10	1.30004e-09	-8.95757e-11
350	1.04267e-07	3.05692e-09	-1.06985e-10	-4.44428e-11	-8.5468e-12	-4.87736e-11	-8.36854e-11	8.34576e-09	-1.11039e-10	2.60946e-09	-8.77892e-11	7.7466e-10	1.24478e-09	-1.13507e-10
357	1.04264e-07	3.07195e-09	-1.25982e-10	-4.43862e-11	-4.49701e-11	-1.36757e-11	-7.70723e-11	8.28511e-09	-1.26082e-10	2.5552e-09	-8.44776e-11	7.4879e-10	1.16903e-09	-8.91241e-11
364	1.04207e-07	3.08416e-09	-1.1546e-10	-4.46056e-11	-1.02057e-11	-3.71987e-11	-7.02795e-11	8.27029e-09	-1.12993e-10	2.54289e-09	-8.02598e-11	7.6063e-10	1.1214e-09	-9.94602e-11
371	1.04293e-07	3.06934e-09	-9.10254e-11	-5.12125e-11	-2.25775e-11	-4.81721e-11	-8.96397e-11	8.23914e-09	-1.08724e-10	2.47639e-09	-7.48572e-11	7.61984e-10	1.07753e-09	-1.13522e-10
378	1.04297e-07	3.14825e-09	-1.27813e-10	-5.52241e-11	-2.33457e-11	-5.04656e-11	-8.55679e-11	8.21219e-09	-9.65327e-11	2.47356e-09	-9.52874e-11	7.48287e-10	1.07544e-09	-1.06542e-10
385	1.04272e-07	3.13904e-09	-1.16602e-10	-5.68363e-11	-8.42523e-12	-4.22553e-11	-9.21083e-11	8.15902e-09	-1.12e-10	2.43917e-09	-1.01736e-10	7.51432e-10	1.02086e-09	-1.09857e-10
392	1.04219e-07	3.18461e-09	-1.18109e-10	-5.38206e-11	-1.57471e-11	-4.23845e-11	-8.7484e-11	8.10973e-09	-1.11744e-10	2.39035e-09	-8.6426e-11	7.44794e-10	9.83233e-10	-9.44791e-11
399	1.04279e-07	3.01486e-09	-1.11278e-10	-5.34789e-11	-1.71547e-11	-3.33803e-11	-8.13982e-11	8.09375e-09	-1.09917e-10	2.35182e-09	-1.08566e-10	7.5364e-10	9.44666e-10	-1.12414e-10
406	1.04241e-07	3.08822e-09	-1.04358e-10	-6.27542e-11	-1.79936e-11	-4.31461e-11	-6.4881e-11	7.98439e-09	-1.06971e-10	2.34923e-09	-1.05056e-10	7.58821e-10	9.06334e-10	-1.11607e-10
413	1.04255e-07	3.08595e-09	-9.95487e-11	-4.18217e-11	-3.15341e-11	-4.89013e-11	-6.98627e-11	8.0015e-09	-1.14753e-10	2.34432e-09	-9.79106e-11	7.38451e-10	8.91551e-10	-9.23791e-11
420	1.04288e-07	3.12717e-09	-1.0872e-10	-6.228e-11	-2.6147e-11	-4.99231e-11	-8.7666e-11	8.00939e-09	-1.18629e-10	2.34442e-09	-9.88043e-11	7.41746e-10	8.45251e-10	-1.06934e-10
427	1.0427e-07	3.04966e-09	-1.05935e-10	-5.81796e-11	-1.21268e-11	-4.26508e-11	-6.70298e-11	7.9267e-09	-1.07755e-10	2.28951e-09	-8.07798e-11	7.44327e-10	8.20991e-10	-1.01686e-10
434	1.04276e-07	3.06742e-09	-1.16826e-10	-7.64713e-11	-1.36253e-11	-4.63794e-11	-7.57141e-11	7.95021e-09	-1.08432e-10	2.27813e-09	-9.90541e-11	7.37493e-10	8.08079e-10	-1.01531e-10
441	1.04294e-07	3.02728e-09	-1.21384e-10	-5.03367e-11	-2.09351e-11	-4.66695e-11	-1.0012e-10	7.8504e-09	-1.0579e-10	2.27777e-09	-9.32552e-11	7.41338e-10	7.63591e-10	-1.01476e-10
448	1.04237e-07	3.05689e-09	-1.19227e-10	-5.19698e-11	-2.8704e-11	-5.30255e-11	-7.81504e-11	7.88056e-09	-1.17546e-10	2.28827e-09	-8.28412e-11	7.50257e-10	7.7472e-10	-1.06236e-10
455	1.04248e-07	3.11375e-09	-1.13958e-10	-5.12416e-11	-3.1993e-11	-4.51252e-11	-6.00864e-11	7.86613e-09	-1.09585e-10	2.22661e-09	-1.014e-10	7.50968e-10	7.4274e-10	-1.20063e-10
462	1.04267e-07	3.33001e-09	-1.2198e-10	-5.02782e-11	-2.23572e-11	-5.64777e-11	-8.36721e-11	7.83405e-09	-1.10188e-10	2.21278e-09	-9.98305e-11	7.22581e-10	7.13467e-10	-1.13978e-10
469	1.04284e-07	3.04034e-09	-1.21113e-10	-4.68702e-11	-1.21619e-11	-4.80428e-11	-8.49226e-11	7.83474e-09	-1.15362e-10	2.19286e-09	-8.91371e-11	7.24478e-10	7.06661e-10	-1.11221e-10
476	1.04241e-07	3.13295e-09	-1.23415e-10	-5.45108e-11	-9.94819e-12	-6.75393e-11	-8.32622e-11	7.7695e-09	-1.14006e-10	2.22755e-09	-8.79202e-11	7.17663e-10	6.89759e-10	-1.06548e-10
483	1.04217e-07	3.00404e-09	-1.18725e-10	-6.36134e-11	-2.28606e-11	-4.23928e-11	-8.51391e-11	7.75472e-09	-1.20164e-10	2.16413e-09	-7.85453e-11	7.31458e-10	6.67808e-10	-1.04251e-10
490	1.04233e-07	3.16342e-09	-1.20292e-10	-5.66224e-11	5.4751e-13	-6.51619e-11	-9.50387e-11	7.7557e-09	-1.13801e-10	2.18226e-09	-8.94931e-11	7.09683e-10	6.66283e-10	-1.09853e-10
497	1.04225e-07	3.0466e-09	-1.06514e-10	-5.56944e-11	-3.11853e-11	-4.90651e-11	-8.80998e-11	7.75938e-09	-1.20446e-10	2.16394e-09	-9.98235e-11	7.21384e-10	6.58902e-10	-9.94447e-11
504	1.04256e-07	3.21384e-09	-1.13412e-10	-6.70889e-11	-3.96427e-11	-6.72633e-11	-8.94622e-11	7.6892e-09	-1.26417e-10	2.17798e-09	-9.74677e-11	7.10714e-10	6.8005e-10	-1.15518e-10
511	1.04244e-07	3.22622e-09	-1.12545e-10	-7.39796e-11	-1.90679e-11	-5.59466e-11	-8.04235e-11	7.69653e-09	-1.10698e-10	2.14799e-09	-8.61031e-11	7.05998e-10	6.18353e-10	-1.03654e-10
518	1.04168e-07	3.09419e-09	-1.23022e-10	-6.43944e-11	-1.75386e-11	-3.58582e-11	-9.02763e-11	7.69022e-09	-1.09948e-10	2.14763e-09	-1.04561e-10	7.24788e-10	6.09293e-10	-1.05597e-10
525	1.04188e-07	3.03977e-09	-1.17212e-10	-7.73631e-11	-2.46813e-11	-5.58212e-11	-9.06226e-11	7.64653e-09	-1.11792e-10	2.13771e-09	-9.07652e-11	7.01673e-10	6.29178e-10	-1.12127e-10
532	1.042e-07	3.09788e-09	-1.20763e-10	-6.84018e-11	-2.98078e-11	-6.77588e-11	-8.71135e-11	7.64614e-09	-1.14067e-10	2.15444e-09	-1.07728e-10	7.31238e-10	6.17326e-10	-9.99539e-11
539	1.04189e-07	3.11732e-09	-1.21765e-10	-6.80605e-11	4.69101e-13	-3.89268e-11	-7.90703e-11	7.6431e-09	-1.00069e-10	2.10104e-09	-8.00143e-11	7.15569e-10	6.30467e-10	-1.13502e-10
546	1.04184e-07	3.1541e-09	-1.15432e-10	-5.57398e-11	-1.10725e-11	-6.90363e-11	-7.58432e-11	7.6464e-09	-1.23662e-10	2.12348e-09	-8.32083e-11	7.18855e-10	5.85898e-10	-1.10012e-10
553	1.04167e-07	3.13912e-09	-1.07249e-10	-7.42038e-11	-3.83437e-11	-5.19962e-11	-6.42831e-11	7.65738e-09	-1.09293e-10	2.08439e-09	-9.87939e-11	7.0453e-10	5.94361e-10	-9.84379e-11
560	1.04135e-07	3.11022e-09	-1.15043e-10	-6.52671e-11	-1.88122e-11	-6.4521e-11	-7.79305e-11	7.60298e-09	-1.15147e-10	2.12231e-09	-8.66432e-11	7.43045e-10	6.01756e-10	-1.14346e-10
567	1.04156e-07	3.02648e-09	-1.12688e-10	-5.98712e-11	6.06187e-12	-6.92956e-11	-7.41917e-11	7.6167e-09	-1.0526e-10	2.14119e-09	-9.61465e-11	7.15304e-10	5.69421e-10	-1.0955e-10
574	1.04187e-07	3.07317e-09	-9.85776e-11	-5.94043e-11	-3.63741e-11	-5.68659e-11	-8.3971e-11	7.56878e-09	-1.08261e-10	2.0999e-09	-9.6183e-11	6.88937e-10	5.80929e-10	-1.1958e-10
581	1.04115e-07	3.1186e-09	-1.02684e-10	-6.20982e-11	-3.68423e-11	-4.67912e-11	-6.56507e-11	7.55563e-09	-1.2178e-10	2.12103e-09	-1.00832e-10	7.00743e-10	5.59969e-10	-8.97678e-11
588	1.04099e-07	3.17923e-09	-1.07281e-10	-7.02881e-11	-2.47989e-11	-5.58509e-11	-7.8908e-11	7.57788e-09	-1.03989e-10	2.11746e-09	-9.59389e-11	6.87276e-10	5.72406e-10	-9.72869e-11
595	1.04132e-07	3.06135e-09	-1.11138e-10	-6.6404e-11	-2.9342e-11	-7.41483e-11	-7.33018e-11	7.55592e-09	-1.02776e-10	2.12611e-09	-9.5477e-11	6.99309e-10	5.5852e-10	-1.19861e-10
602	1.04131e-07	2.99256e-09	-1.21624e-10	-5.40291e-11	-1.62049e-11	-6.53019e-11	-7.30609e-11	7.5581e-09	-1.12828e-10	2.09372e-09	-8.17922e-11	6.97942e-10	5.59935e-10	-1.0113e-10
609	1.04092e-07	3.0464e-09	-1.16231e-10	-6.71447e-11	-3.1128e-11	-6.06505e-11	-7.61034e-11	7.51453e-09	-1.14261e-10	2.10689e-09	-9.64793e-11	6.98513e-10	5.71058e-10	-1.02772e-10
616	1.0408e-07	3.21321e-09	-1.13818e-10	-5.34794e-11	-4.17222e-11	-5.67851e-11	-8.05418e-11	7.54892e-09	-1.21926e-10	2.10713e-09	-8.94601e-11	7.05311e-10	5.47123e-10	-1.08046e-10
623	1.04136e-07	3.03856e-09	-1.19751e-10	-6.61848e-11	-2.69727e-11	-4.69387e-11	-7.97257e-11	7.52964e-09	-1.14196e-10	2.09807e-09	-9.19753e-11	6.94363e-10	5.5262e-10	-1.063e-10
630	1.04187e-07	3.06682e-09	-1.00025e-10	-7.20167e-11	-3.60968e-11	-6.09445e-11	-7.94302e-11	7.52232e-09	-1.04638e-10	2.09134e-09	-1.01259e-10	7.02781e-10	5.55578e-10	-1.19208e-10
637	1.04176e-07	3.01139e-09	-1.0755e-10	-6.8074e-11	-2.66333e-11	-4.59833e-11	-9.83435e-11	7.51877e-09	-9.93146e-11	2.08069e-09	-1.12183e-10	7.24968e-10	5.42691e-10	-1.03474e-10
644	1.04155e-07	3.08192e-09	-1.17358e-10	-7.46993e-11	-6.61411e-13	-4.50248e-11	-8.00282e-11	7.48636e-09	-1.18322e-10	2.0628e-09	-9.04669e-11	6.87956e-10	5.43412e-10	-1.17115e-10
651	1.04125e-07	3.20337e-09	-1.16258e-10	-5.94889e-11	-2.86974e-11	-6.17402e-11	-7.4264e-11	7.52916e-09	-1.17425e-10	2.0699e-09	-8.00017e-11	6.92776e-10	5.34297e-10	-1.11932e-10
658	1.04126e-07	3.06312e-09	-1.14574e-10	-6.01627e-11	-2.26466e-11	-5.61949e-11	-7.83201e-11	7.46367e-09	-1.21593e-10	2.05427e-09	-7.9075e-11	7.00751e-10	5.43383e-10	-9.88086e-11
665	1.04076e-07	3.18074e-09	-1.17337e-10	-7.35774e-11	-3.72592e-11	-6.5156e-11	-8.41853e-11	7.50449e-09	-1.21445e-10	2.06696e-09	-1.02708e-10	6.76209e-10	5.39969e-10	-1.18995e-10
672	1.04052e-07	3.07252e-09	-1.14629e-10	-6.06591e-11	2.72254e-12	-6.96929e-11	-8.96833e-11	7.45854e-09	-1.20682e-10	2.05163e-09	-8.91229e-11	6.82487e-10	5.24654e-10	-1.06864e-10
679	1.04018e-07	3.10782e-09	-1.27643e-10	-7.47029e-11	-2.59687e-11	-6.48327e-11	-5.00906e-11	7.50236e-09	-1.04558e-10	2.08646e-09	-9.54358e-11	7.10399e-10	5.27604e-10	-1.12697e-10
686	1.04002e-07	3.09395e-09	-1.13623e-10	-6.28508e-11	-3.49134e-11	-4.00816e-11	-7.85718e-11	7.44974e-09	-1.1478e-10	2.08094e-09	-1.01589e-10	6.92615e-10	5.31614e-10	-1.04548e-10
693	1.04051e-07	3.00763e-09	-1.09559e-10	-7.47644e-11	-3.80087e-11	-6.32285e-11	-7.77312e-11	7.44452e-09	-1.18318e-10	2.08817e-09	-9.40623e-11	7.00552e-10	5.26925e-10	-1.20269e-10
700	1.04139e-07	3.34904e-09	-1.17851e-10	-7.32464e-11	-3.69167e-11	-6.16393e-11	-7.0951e-11	7.41404e-09	-1.12243e-10	2.08559e-09	-9.51791e-11	6.86055e-10	5.00883e-10	-1.20987e-10
707	1.04126e-07	3.06544e-09	-1.11855e-10	-7.52746e-11	-2.52272e-12	-7.2202e-11	-4.25379e-11	7.44446e-09	-9.88442e-11	2.08394e-09	-1.01843e-10	6.99581e-10	5.43181e-10	-1.14459e-10
714	1.04138e-07	3.15026e-09	-1.15418e-10	-7.34487e-11	-1.74236e-11	-5.17862e-11	-7.73273e-11	7.45567e-09	-1.10576e-10	2.06593e-09	-9.59389e-11	6.89612e-10	5.12057e-10	-1.06648e-10
721	1.04118e-07	3.0961e-09	-1.11717e-10	-6.46235e-11	-1.30261e-11	-6.35143e-11	-8.16631e-11	7.42337e-09	-1.06925e-10	2.06624e-09	-1.03218e-10	7.04934e-10	5.21042e-10	-1.14638e-10
728	1.04122e-07	3.05301e-09	-1.17755e-10	-6.19164e-11	-1.79114e-11	-6.39192e-11	-8.99254e-11	7.38691e-09	-1.08634e-10	2.06108e-09	-9.40147e-11	6.85503e-10	5.26651e-10	-1.10422e-10
735	1.04153e-07	3.01268e-09	-1.25097e-10	-6.23893e-11	-3.0243e-11	-4.19032e-11	-8.70167e-11	7.37935e-09	-1.0576e-10	2.05826e-09	-8.63148e-11	6.93402e-10	5.27504e-10	-1.1426e-10
742	1.04152e-07	2.98558e-09	-1.10516e-10	-6.771e-11	-2.61209e-11	-6.12836e-11	-8.3437e-11	7.40731e-09	-1.18017e-10	2.05539e-09	-9.42618e-11	6.85397e-10	5.29465e-10	-1.11159e-10
749	1.04222e-07	3.02881e-09	-1.04491e-10	-7.67558e-11	-2.50965e-11	-5.18589e-11	-7.20666e-11	7.37961e-09	-1.15548e-10	2.06009e-09	-9.30406e-11	6.93401e-10	5.2035e-10	-1.08648e-10
756	1.04185e-07	3.1394e-09	-1.13723e-10	-7.53112e-11	-2.98124e-11	-5.62946e-11	-9.54152e-11	7.36846e-09	-1.20875e-10	2.04117e-09	-9.16107e-11	6.81607e-10	5.14182e-10	-1.08752e-10
763	1.04135e-07	3.06984e-09	-1.07152e-10	-5.64958e-11	-7.69064e-12	-5.14875e-11	-7.80254e-11	7.37702e-09	-1.01213e-10	2.04714e-09	-1.06425e-10	6.9015e-10	4.93122e-10	-1.16922e-10
770	1.04158e-07	3.02218e-09	-1.22415e-10	-6.86315e-11	-4.01832e-11	-4.18726e-11	-7.76117e-11	7.37763e-09	-9.96901e-11	2.05575e-09	-8.90803e-11	7.03341e-10	5.0188e-10	-1.05384e-10
777	1.04205e-07	3.1737e-09	-1.13939e-10	-6.67315e-11	-3.37696e-11	-6.15148e-11	-8.32999e-11	7.33811e-09	-9.79455e-11	2.08078e-09	-9.30768e-11	7.22814e-10	4.90295e-10	-1.05378e-10
784	1.04156e-07	3.15881e-09	-1.21499e-10	-6.58103e-11	-3.76497e-11	-6.23514e-11	-8.39849e-11	7.35634e-09	-1.19649e-10	2.09164e-09	-8.87675e-11	6.7921e-10	4.96934e-10	-1.05785e-10
791	1.04125e-07	3.01896e-09	-1.22624e-10	-7.18882e-11	-9.53747e-12	-6.43083e-11	-7.17905e-11	7.31714e-09	-1.29045e-10	2.08643e-09	-9.33873e-11	6.97592e-10	5.35544e-10	-1.09389e-10
798	1.04097e-07	3.06635e-09	-1.11294e-10	-6.92564e-11	-2.69753e-11	-5.76317e-11	-7.87995e-11	7.36707e-09	-1.2204e-10	2.06057e-09	-1.02026e-10	6.69442e-10	5.11875e-10	-8.94513e-11
805	1.04038e-07	3.12283e-09	-1.20436e-10	-6.8348e-11	-1.53618e-11	-5.54483e-11	-9.62258e-11	7.33148e-09	-1.15011e-10	2.06389e-09	-9.13222e-11	7.0424e-10	5.17197e-10	-1.22309e-10
812	1.0406e-07	3.04594e-09	-1.12854e-10	-6.26896e-11	-1.86209e-11	-4.41011e-11	-8.12718e-11	7.32322e-09	-1.137e-10	2.06377e-09	-9.28731e-11	6.75953e-10	5.2838e-10	-1.05231e-10
819	1.04067e-07	3.04631e-09	-1.13613e-10	-4.77907e-11	-2.41788e-11	-5.77565e-11	-7.74757e-11	7.35623e-09	-1.22218e-10	2.06962e-09	-9.5412e-11	6.84682e-10	5.03135e-10	-1.04663e-10
826	1.04027e-07	3.03458e-09	-1.08951e-10	-5.98066e-11	-2.425e-11	-6.61796e-11	-6.90534e-11	7.33407e-09	-1.18625e-10	2.07477e-09	-9.18121e-11	6.88446e-10	5.11989e-10	-1.09397e-10
833	1.03951e-07	3.11256e-09	-1.14558e-10	-7.36631e-11	-4.73962e-11	-5.49041e-11	-7.99345e-11	7.30302e-09	-1.14432e-10	2.05267e-09	-1.02113e-10	6.77384e-10	4.96903e-10	-1.12757e-10
840	1.0401e-07	3.2494e-09	-9.32061e-11	-5.51362e-11	-1.48169e-11	-7.38859e-11	-7.15379e-11	7.31718e-09	-1.23943e-10	2.07745e-09	-1.03277e-10	6.73015e-10	4.98827e-10	-1.04428e-10
847	1.04e-07	3.05538e-09	-1.15718e-10	-6.85806e-11	-3.79548e-11	-6.74803e-11	-8.59866e-11	7.29669e-09	-1.28141e-10	2.05595e-09	-9.68009e-11	6.98233e-10	5.11113e-10	-9.48343e-11
854	1.03983e-07	3.06711e-09	-1.06831e-10	-5.32554e-11	-2.53094e-11	-6.73447e-11	-8.83371e-11	7.30744e-09	-1.12758e-10	2.06908e-09	-9.54478e-11	6.91503e-10	5.06937e-10	-1.10022e-10
861	1.04034e-07	3.02563e-09	-1.12737e-10	-5.71821e-11	-2.52083e-11	-7.80095e-11	-8.95414e-11	7.34445e-09	-1.05819e-10	2.03343e-09	-9.33028e-11	6.96269e-10	5.17215e-10	-1.11934e-10
868	1.03987e-07	3.03113e-09	-1.22932e-10	-8.26393e-11	-1.46713e-11	-5.91155e-11	-9.2368e-11	7.36251e-09	-1.2157e-10	2.05467e-09	-9.82238e-11	7.08859e-10	5.07632e-10	-1.08231e-10
875	1.03999e-07	3.05473e-09	-1.09889e-10	-7.83964e-11	-2.89966e-11	-4.17057e-11	-8.97666e-11	7.29924e-09	-1.08221e-10	2.06211e-09	-1.0624e-10	6.98388e-10	5.16073e-10	-1.13142e-10
882	1.04048e-07	3.17249e-09	-1.17919e-10	-6.59101e-11	-1.45618e-11	-5.66414e-11	-8.82642e-11	7.32744e-09	-1.12321e-10	2.02854e-09	-8.05148e-11	6.65026e-10	5.08201e-10	-1.28771e-10
889	1.04044e-07	3.23054e-09	-1.14313e-10	-5.92637e-11	-2.95866e-11	-5.33811e-11	-8.8855e-11	7.28502e-09	-1.14705e-10	2.06767e-09	-1.03484e-10	6.99785e-10	5.10395e-10	-1.11802e-10
896	1.04035e-07	3.06587e-09	-1.17429e-10	-7.263e-11	-2.05096e-11	-6.74359e-11	-8.79893e-11	7.32327e-09	-1.04247e-10	2.07682e-09	-1.03388e-10	6.7869e-10	4.90818e-10	-9.41398e-11
903	1.04021e-07	3.02848e-09	-1.14554e-10	-6.10667e-11	-3.31948e-11	-5.49539e-11	-8.81473e-11	7.30539e-09	-1.09003e-10	2.08193e-09	-9.62611e-11	7.07281e-10	4.87727e-10	-1.06373e-10
910	1.04071e-07	3.05472e-09	-1.07389e-10	-9.26594e-11	-7.39455e-12	-5.38625e-11	-7.70796e-11	7.302e-09	-1.18751e-10	2.06235e-09	-1.11926e-10	6.76675e-10	5.20488e-10	-1.20271e-10
917	1.04043e-07	3.12823e-09	-1.1462e-10	-8.03457e-11	-2.50672e-11	-4.83202e-11	-8.41829e-11	7.26596e-09	-1.10639e-10	2.0547e-09	-8.47842e-11	6.80865e-10	5.15601e-10	-1.12524e-10
924	1.04054e-07	3.05262e-09	-1.07688e-10	-8.51679e-11	-8.9329e-13	-7.22611e-11	-9.61215e-11	7.2903e-09	-1.07712e-10	2.0293e-09	-9.29594e-11	6.96793e-10	4.97681e-10	-1.10058e-10
931	1.04038e-07	2.99725e-09	-1.02752e-10	-5.35735e-11	-3.73114e-11	-6.91064e-11	-6.87893e-11	7.28877e-09	-1.14368e-10	2.04557e-09	-9.68427e-11	6.83878e-10	4.92422e-10	-1.03138e-10
938	1.03986e-07	3.02999e-09	-1.088e-10	-6.91393e-11	-2.52801e-11	-5.56261e-11	-8.3689e-11	7.3226e-09	-1.08689e-10	2.05381e-09	-9.82342e-11	6.93338e-10	4.79104e-10	-1.0013e-10
945	1.04011e-07	3.20264e-09	-1.13744e-10	-6.70423e-11	-2.52838e-11	-7.49651e-11	-7.45965e-11	7.27322e-09	-1.16653e-10	2.10068e-09	-9.74026e-11	7.02902e-10	4.88867e-10	-1.03705e-10
952	1.0405e-07	3.13661e-09	-1.22025e-10	-7.08295e-11	-2.95935e-11	-6.16211e-11	-8.49746e-11	7.30609e-09	-1.15164e-10	2.03574e-09	-9.53889e-11	6.95369e-10	5.28175e-10	-1.20068e-10
959	1.04126e-07	3.01841e-09	-1.15021e-10	-6.80154e-11	-1.4588e-11	-6.71413e-11	-9.34649e-11	7.23538e-09	-1.06294e-10	2.04586e-09	-8.70592e-11	7.08428e-10	4.97206e-10	-1.18324e-10
966	1.04137e-07	3.03593e-09	-1.21303e-10	-7.3743e-11	-7.93847e-12	-5.25427e-11	-9.231e-11	7.24705e-09	-1.0416e-10	2.06748e-09	-1.05644e-10	6.93139e-10	5.2662e-10	-9.59879e-11
973	1.04118e-07	3.03863e-09	-1.12461e-10	-6.4839e-11	-3.43014e-11	-6.5775e-11	-8.13435e-11	7.25855e-09	-1.13291e-10	2.0488e-09	-7.73653e-11	7.10778e-10	4.95146e-10	-9.65182e-11
980	1.04123e-07	3.00264e-09	-1.15665e-10	-5.16534e-11	-3.59995e-11	-6.56608e-11	-6.94145e-11	7.29394e-09	-1.24161e-10	2.04675e-09	-9.63807e-11	6.92014e-10	4.93657e-10	-1.10926e-10
987	1.0411e-07	3.13327e-09	-1.17971e-10	-7.08755e-11	-1.46715e-11	-6.65117e-11	-6.96234e-11	7.29249e-09	-1.13177e-10	2.06079e-09	-1.03054e-10	7.03341e-10	5.02938e-10	-1.13999e-10
994	1.04033e-07	3.08382e-09	-1.27425e-10	-8.29227e-11	-1.42618e-11	-6.49493e-11	-7.96073e-11	7.23434e-09	-1.09278e-10	2.05587e-09	-8.90514e-11	6.91148e-10	4.77703e-10	-9.75411e-11
1001	1.04028e-07	3.09487e-09	-9.89378e-11	-7.21023e-11	-1.3313e-11	-5.63565e-11	-9.65206e-11	7.24758e-09	-1.27938e-10	2.03492e-09	-9.54168e-11	6.80325e-10	4.92333e-10	-1.04828e-10
1008	1.03979e-07	3.02813e-09	-1.15964e-10	-7.49413e-11	-7.4006e-12	-7.58203e-11	-7.7096e-11	7.25001e-09	-1.16337e-10	2.03389e-09	-9.67453e-11	6.63451e-10	4.98683e-10	-1.09619e-10
1015	1.04043e-07	3.16134e-09	-1.19674e-10	-6.43999e-11	-2.30447e-11	-4.35909e-11	-7.49872e-11	7.24732e-09	-1.18294e-10	2.05006e-09	-1.00229e-10	6.74166e-10	5.016e-10	-1.21153e-10
1022	1.04097e-07	3.10632e-09	-1.05449e-10	-6.16548e-11	-3.19283e-11	-8.2891e-11	-1.00236e-10	7.24099e-09	-1.12393e-10	2.09046e-09	-9.93494e-11	6.64088e-10	5.00004e-10	-1.02692e-10
1029	1.04088e-07	3.02967e-09	-9.8096e-11	-7.98983e-11	-9.80308e-12	-6.48977e-11	-8.31167e-11	7.29977e-09	-1.20608e-10	2.07966e-09	-9.61836e-11	6.88803e-10	5.01039e-10	-1.09113e-10
1036	1.04043e-07	3.00435e-09	-1.2657e-10	-5.38337e-11	-1.9963e-11	-5.58191e-11	-8.35169e-11	7.23434e-09	-1.15296e-10	2.0468e-09	-9.81918e-11	6.7855e-10	5.091e-10	-1.06876e-10
1043	1.0403e-07	3.15993e-09	-1.13497e-10	-7.16662e-11	-1.28515e-12	-5.36516e-11	-7.06872e-11	7.25322e-09	-1.18736e-10	2.07295e-09	-8.76437e-11	6.8431e-10	5.0159e-10	-1.14746e-10
1050	1.04011e-07	3.1229e-09	-1.115e-10	-5.77243e-11	-5.01204e-11	-5.58314e-11	-9.26954e-11	7.28278e-09	-1.02428e-10	2.084e-09	-8.48442e-11	6.91178e-10	5.01889e-10	-1.00616e-10
1057	1.04006e-07	3.10086e-09	-1.12002e-10	-7.34602e-11	-3.27458e-11	-3.91305e-11	-6.97033e-11	7.26908e-09	-1.19505e-10	2.06193e-09	-9.38211e-11	6.84383e-10	4.91574e-10	-1.17092e-10
1064	1.04001e-07	3.03271e-09	-9.40146e-11	-8.49222e-11	-3.11247e-11	-6.37827e-11	-6.75743e-11	7.22602e-09	-1.16174e-10	2.0435e-09	-9.88871e-11	7.02696e-10	4.98774e-10	-1.11431e-10
1071	1.04041e-07	3.04237e-09	-1.34828e-10	-7.35236e-11	-2.25314e-11	-5.78449e-11	-7.16878e-11	7.28912e-09	-1.07631e-10	2.04252e-09	-9.59221e-11	6.64404e-10	5.01491e-10	-1.18823e-10
1078	1.04093e-07	3.16996e-09	-1.20045e-10	-5.53805e-11	-1.41019e-11	-7.05468e-11	-8.17036e-11	7.22498e-09	-1.18102e-10	2.0341e-09	-6.95495e-11	6.79079e-10	4.92112e-10	-9.27835e-11
1085	1.04027e-07	3.1291e-09	-1.00645e-10	-7.45563e-11	-3.47658e-11	-6.7396e-11	-8.88447e-11	7.23409e-09	-1.0656e-10	2.05808e-09	-9.34178e-11	6.76309e-10	4.92967e-10	-1.21536e-10
1092	1.04056e-07	3.09004e-09	-9.59685e-11	-7.18961e-11	-3.93099e-11	-5.86556e-11	-8.52458e-11	7.31338e-09	-1.31596e-10	2.041e-09	-8.40066e-11	6.93685e-10	4.8645e-10	-1.03356e-10
1099	1.04025e-07	3.08558e-09	-9.46362e-11	-6.52103e-11	-5.31522e-11	-6.14384e-11	-6.79038e-11	7.21771e-09	-1.20963e-10	2.06584e-09	-9.82422e-11	7.01266e-10	4.8287e-10	-1.12241e-10
1106	1.04105e-07	3.06384e-09	-1.28422e-10	-5.62295e-11	-2.49355e-11	-7.17234e-11	-8.52402e-11	7.25979e-09	-1.06945e-10	2.02953e-09	-8.11439e-11	6.8434e-10	5.06605e-10	-1.21353e-10
1113	1.04061e-07	3.04012e-09	-1.1869e-10	-7.29463e-11	-1.15103e-11	-5.83039e-11	-8.39115e-11	7.24758e-09	-1.10489e-10	2.06563e-09	-8.9014e-11	7.04202e-10	4.7623e-10	-1.20475e-10
1120	1.03983e-07	3.02493e-09	-1.09733e-10	-7.77765e-11	-1.75806e-11	-7.30513e-11	-9.62736e-11	7.21157e-09	-9.95995e-11	2.06105e-09	-9.58446e-11	6.97009e-10	5.0439e-10	-1.16426e-10
1127	1.04022e-07	3.18512e-09	-9.69953e-11	-6.17902e-11	-3.31501e-11	-5.80685e-11	-9.46433e-11	7.23197e-09	-1.21189e-10	2.09021e-09	-1.04056e-10	6.75007e-10	4.83051e-10	-9.33931e-11
1134	1.03985e-07	3.02463e-09	-1.1419e-10	-6.55874e-11	-3.24258e-11	-6.6298e-11	-9.65425e-11	7.25047e-09	-1.11069e-10	2.06938e-09	-9.44352e-11	7.02775e-10	4.86954e-10	-1.07745e-10
1141	1.03933e-07	2.96845e-09	-1.07704e-10	-7.0527e-11	-1.33285e-11	-6.32604e-11	-9.53076e-11	7.19698e-09	-1.05549e-10	2.05163e-09	-1.04115e-10	6.81361e-10	5.0208e-10	-1.13394e-10
1148	1.04048e-07	3.13031e-09	-1.28712e-10	-7.7035e-11	-9.01909e-12	-7.45533e-11	-8.09214e-11	7.24715e-09	-1.1963e-10	2.06916e-09	-1.00783e-10	6.79239e-10	5.0069e-10	-9.8273e-11
1155	1.04004e-07	3.03637e-09	-1.20463e-10	-7.29998e-11	-2.63113e-11	-7.64661e-11	-6.95133e-11	7.2721e-09	-1.06639e-10	2.03492e-09	-9.49804e-11	6.79856e-10	4.82067e-10	-9.79921e-11
1162	1.04026e-07	3.11594e-09	-1.1361e-10	-5.98636e-11	-1.87406e-11	-5.90663e-11	-7.78809e-11	7.2131e-09	-1.12885e-10	2.03853e-09	-9.08448e-11	6.78207e-10	5.00532e-10	-1.08804e-10
1169	1.0408e-07	3.06716e-09	-1.00462e-10	-6.36169e-11	-2.13789e-11	-6.09295e-11	-7.37467e-11	7.23703e-09	-1.22512e-10	2.06011e-09	-9.39371e-11	6.85464e-10	4.7731e-10	-1.09966e-10
1176	1.04102e-07	3.135e-09	-1.28922e-10	-5.93617e-11	-2.20849e-11	-5.99666e-11	-8.81486e-11	7.25604e-09	-1.00971e-10	2.04139e-09	-8.42704e-11	6.74763e-10	4.74347e-10	-1.12296e-10
1183	1.04049e-07	3.13681e-09	-1.0688e-10	-8.64854e-11	-2.41349e-11	-5.0729e-11	-7.462e-11	7.26524e-09	-1.16646e-10	2.03882e-09	-9.63522e-11	6.9017e-10	4.80533e-10	-1.04959e-10
1190	1.04097e-07	3.24289e-09	-1.23459e-10	-5.67856e-11	-2.9178e-11	-5.80909e-11	-6.05974e-11	7.29549e-09	-1.23653e-10	2.07879e-09	-1.00515e-10	6.85473e-10	5.01172e-10	-1.18691e-10
1197	1.04048e-07	3.02645e-09	-1.19274e-10	-6.79124e-11	-7.75507e-12	-5.28134e-11	-8.82041e-11	7.24714e-09	-1.09884e-10	2.07363e-09	-9.84441e-11	6.65177e-10	4.92594e-10	-1.17687e-10
1204	1.04044e-07	3.0439e-09	-1.16613e-10	-7.65849e-11	-1.58877e-11	-6.39115e-11	-9.12649e-11	7.22829e-09	-1.23165e-10	2.06033e-09	-1.07168e-10	7.02729e-10	4.95933e-10	-1.02382e-10
1211	1.0398e-07	3.07622e-09	-1.17175e-10	-7.86852e-11	-2.99262e-11	-7.07437e-11	-7.46152e-11	7.23323e-09	-1.16914e-10	2.05128e-09	-1.01692e-10	6.80272e-10	4.84236e-10	-1.01966e-10
1218	1.04052e-07	3.08738e-09	-1.10606e-10	-7.60371e-11	-3.34462e-11	-3.69995e-11	-7.87561e-11	7.21602e-09	-1.15566e-10	2.04731e-09	-9.23795e-11	6.8101e-10	5.12052e-10	-1.14852e-10
1225	1.04099e-07	3.03238e-09	-1.14487e-10	-7.19912e-11	-2.55554e-11	-6.77837e-11	-7.84356e-11	7.25003e-09	-1.30618e-10	2.06529e-09	-9.87217e-11	6.84771e-10	4.96707e-10	-1.13389e-10
1232	1.0414e-07	3.0599e-09	-1.02563e-10	-7.16521e-11	-3.72139e-11	-5.91612e-11	-7.85039e-11	7.20883e-09	-1.17407e-10	2.06381e-09	-1.03105e-10	6.96205e-10	4.83832e-10	-9.96708e-11
1239	1.04167e-07	3.08696e-09	-1.11635e-10	-6.11208e-11	-2.17885e-11	-6.26419e-11	-6.69391e-11	7.25106e-09	-1.07222e-10	2.04917e-09	-9.07452e-11	6.8636e-10	5.0087e-10	-1.06084e-10
1246	1.04097e-07	3.08016e-09	-1.1844e-10	-7.93991e-11	-3.54065e-11	-5.37427e-11	-7.85933e-11	7.23739e-09	-1.09499e-10	2.0452e-09	-9.35523e-11	6.89025e-10	5.03336e-10	-1.17315e-10
1253	1.04081e-07	3.09714e-09	-1.06797e-10	-5.96604e-11	-2.46352e-11	-7.20405e-11	-7.84024e-11	7.23131e-09	-1.00723e-10	2.05863e-09	-8.34343e-11	6.995e-10	5.02565e-10	-1.11787e-10
1260	1.04047e-07	3.06425e-09	-1.16694e-10	-6.81463e-11	-2.6552e-11	-5.90628e-11	-9.89702e-11	7.21406e-09	-1.03037e-10	2.06373e-09	-1.01658e-10	6.98559e-10	5.02855e-10	-1.14162e-10
1267	1.04062e-07	3.15045e-09	-1.19697e-10	-6.23964e-11	-2.19746e-11	-6.41417e-11	-8.28744e-11	7.24009e-09	-1.19008e-10	2.06124e-09	-7.72757e-11	7.01249e-10	4.92425e-10	-1.18504e-10
1274	1.04125e-07	3.01112e-09	-1.13061e-10	-7.75121e-11	-3.5146e-11	-4.86822e-11	-8.1462e-11	7.26677e-09	-1.09768e-10	2.04802e-09	-1.12941e-10	6.89635e-10	4.90168e-10	-1.11819e-10
1281	1.04076e-07	3.0147e-09	-1.039e-10	-7.79395e-11	-2.31656e-11	-5.96708e-11	-7.28176e-11	7.2152e-09	-1.15383e-10	2.05046e-09	-1.04228e-10	6.85941e-10	4.90316e-10	-8.3052e-11
1288	1.04094e-07	3.06974e-09	-1.20755e-10	-5.6232e-11	-1.61851e-11	-5.69642e-11	-8.66857e-11	7.23503e-09	-1.03228e-10	2.02369e-09	-9.75214e-11	6.71178e-10	4.76616e-10	-1.20207e-10
1295	1.04081e-07	3.0756e-09	-1.15568e-10	-6.91907e-11	-3.67854e-11	-6.44797e-11	-7.46369e-11	7.2085e-09	-1.16093e-10	2.05235e-09	-8.69039e-11	6.73603e-10	4.87366e-10	-1.08191e-10
1302	1.04054e-07	3.05593e-09	-1.21928e-10	-5.69061e-11	-3.27401e-11	-5.38622e-11	-8.79787e-11	7.23664e-09	-1.13912e-10	2.05503e-09	-8.40899e-11	6.89138e-10	4.99429e-10	-1.14033e-10
1309	1.04018e-07	3.0177e-09	-1.15934e-10	-6.29317e-11	-2.46297e-11	-7.11909e-11	-9.52474e-11	7.23364e-09	-1.15323e-10	2.04932e-09	-1.03048e-10	6.90498e-10	5.04468e-10	-1.27207e-10
1316	1.04028e-07	3.02692e-09	-1.28153e-10	-8.23345e-11	-2.36307e-11	-7.55498e-11	-6.39632e-11	7.27043e-09	-1.20217e-10	2.0244e-09	-7.68936e-11	6.95582e-10	4.9085e-10	-1.08649e-10
1323	1.04053e-07	3.03597e-09	-1.19216e-10	-7.13503e-11	-2.20456e-11	-6.33938e-11	-7.62079e-11	7.23306e-09	-1.08835e-10	2.05448e-09	-9.94402e-11	6.84914e-10	4.96414e-10	-9.51226e-11
1330	1.04022e-07	3.04675e-09	-1.06157e-10	-7.3236e-11	-3.10426e-11	-3.31374e-11	-7.26021e-11	7.18379e-09	-1.20962e-10	2.05354e-09	-9.42953e-11	6.90525e-10	4.81406e-10	-1.13451e-10
1337	1.04056e-07	3.03924e-09	-1.14595e-10	-7.35016e-11	-3.73758e-11	-6.53129e-11	-6.80718e-11	7.24853e-09	-1.17254e-10	2.06012e-09	-1.02232e-10	6.99188e-10	4.66422e-10	-1.12026e-10
1344	1.03959e-07	3.10085e-09	-1.07995e-10	-8.92114e-11	-1.71874e-11	-5.05935e-11	-8.96069e-11	7.21448e-09	-1.09048e-10	2.05336e-09	-9.72636e-11	6.94645e-10	4.92289e-10	-1.17339e-10
1351	1.03974e-07	3.00521e-09	-1.11412e-10	-6.03969e-11	-3.33175e-11	-6.59573e-11	-9.25285e-11	7.24884e-09	-1.04148e-10	2.09786e-09	-1.00874e-10	6.90806e-10	4.94026e-10	-1.20461e-10
1358	1.03976e-07	3.07639e-09	-1.07159e-10	-6.38522e-11	-2.0732e-11	-4.91724e-11	-6.85863e-11	7.21212e-09	-9.57556e-11	2.03441e-09	-9.50154e-11	6.94878e-10	4.87029e-10	-1.14916e-10
1365	1.03949e-07	2.99921e-09	-1.11535e-10	-7.55869e-11	-1.85868e-11	-5.16054e-11	-6.86594e-11	7.22907e-09	-1.12005e-10	2.0721e-09	-8.53964e-11	6.86953e-10	4.98907e-10	-1.06589e-10
1372	1.0396e-07	3.05952e-09	-1.22622e-10	-7.17428e-11	-3.17567e-11	-6.43842e-11	-8.31551e-11	7.24427e-09	-1.00039e-10	2.02784e-09	-8.87393e-11	6.73326e-10	5.08327e-10	-9.77494e-11
1379	1.03959e-07	3.03539e-09	-1.11621e-10	-8.04206e-11	-1.59224e-11	-6.00907e-11	-8.9663e-11	7.20481e-09	-1.25903e-10	2.04295e-09	-1.02415e-10	6.74876e-10	4.86416e-10	-1.17446e-10
1386	1.0396e-07	2.98877e-09	-1.11173e-10	-8.2566e-11	-1.13681e-11	-6.27572e-11	-7.42045e-11	7.23175e-09	-1.11983e-10	2.04571e-09	-9.65544e-11	7.01583e-10	4.8883e-10	-1.09064e-10
1393	1.03944e-07	3.02716e-09	-1.1628e-10	-6.00167e-11	-1.93975e-11	-4.58569e-11	-8.78453e-11	7.24088e-09	-1.19504e-10	2.05701e-09	-1.06335e-10	6.87502e-10	5.18684e-10	-1.06486e-10
1400	1.03915e-07	3.0364e-09	-1.18674e-10	-7.70236e-11	-2.15082e-11	-5.27942e-11	-9.14116e-11	7.19408e-09	-1.07527e-10	2.0686e-09	-1.09909e-10	6.74123e-10	4.751e-10	-1.11046e-10
1407	1.03898e-07	3.00146e-09	-1.16323e-10	-6.05601e-11	-2.70549e-11	-6.6952e-11	-7.78688e-11	7.19432e-09	-1.1008e-10	2.065e-09	-8.67438e-11	6.83373e-10	4.82314e-10	-1.1302e-10
1414	1.03963e-07	3.01777e-09	-1.17738e-10	-6.29536e-11	-2.30604e-11	-6.28722e-11	-7.37835e-11	7.22532e-09	-9.98929e-11	2.05528e-09	-1.06397e-10	6.7986e-10	4.82106e-10	-1.10909e-10
1421	1.03942e-07	3.07369e-09	-1.3155e-10	-7.95258e-11	-1.07095e-11	-5.84569e-11	-9.91136e-11	7.23671e-09	-1.07233e-10	2.04922e-09	-1.11319e-10	6.98994e-10	5.09217e-10	-1.15608e-10
1428	1.04033e-07	3.0506e-09	-1.23426e-10	-7.82241e-11	-8.80413e-13	-6.96744e-11	-8.33489e-11	7.2378e-09	-1.14312e-10	2.08232e-09	-9.67634e-11	6.81376e-10	4.88788e-10	-1.04215e-10
1435	1.041e-07	3.27448e-09	-1.08398e-10	-5.10744e-11	-4.36256e-11	-7.65094e-11	-9.04744e-11	7.26118e-09	-1.11212e-10	2.03019e-09	-1.05201e-10	6.75764e-10	4.83307e-10	-1.02183e-10
1442	1.03981e-07	3.09446e-09	-1.16033e-10	-5.26189e-11	-2.7483e-11	-5.7676e-11	-7.86082e-11	7.20802e-09	-1.09572e-10	2.06447e-09	-9.02413e-11	6.86914e-10	4.84468e-10	-1.00918e-10
1449	1.03899e-07	3.06542e-09	-1.10099e-10	-8.44374e-11	-3.07293e-11	-5.87694e-11	-8.04694e-11	7.22677e-09	-1.1479e-10	2.07198e-09	-8.50834e-11	6.76478e-10	4.904e-10	-1.03434e-10
1456	1.03874e-07	3.08962e-09	-1.16317e-10	-7.82963e-11	-2.80687e-11	-5.69825e-11	-9.93125e-11	7.19372e-09	-1.14742e-10	2.04646e-09	-1.06881e-10	7.09274e-10	5.01158e-10	-1.16292e-10
1463	1.0396e-07	3.14339e-09	-1.11468e-10	-6.78748e-11	-1.65061e-11	-6.53932e-11	-7.92488e-11	7.22507e-09	-1.18099e-10	2.04106e-09	-1.1283e-10	6.81206e-10	4.87428e-10	-1.13103e-10
1470	1.03968e-07	3.08341e-09	-1.11177e-10	-7.12641e-11	-8.72599e-12	-5.78606e-11	-8.43667e-11	7.22685e-09	-1.13107e-10	2.06829e-09	-1.05678e-10	6.77617e-10	4.86039e-10	-1.13814e-10
1477	1.04016e-07	3.00439e-09	-1.07779e-10	-6.74433e-11	-2.44025e-11	-7.18742e-11	-8.37337e-11	7.24277e-09	-1.24726e-10	2.06524e-09	-8.54545e-11	7.02739e-10	4.8344e-10	-1.17696e-10
1484	1.04096e-07	3.13227e-09	-1.30389e-10	-6.05268e-11	-2.02651e-11	-4.63926e-11	-8.1177e-11	7.29312e-09	-1.22963e-10	2.0715e-09	-8.98163e-11	6.99295e-10	5.09128e-10	-1.07318e-10
1491	1.04006e-07	3.02311e-09	-1.0551e-10	-7.63538e-11	-9.40538e-12	-5.73821e-11	-8.77487e-11	7.20091e-09	-1.05554e-10	2.06911e-09	-9.80412e-11	6.7083e-10	5.12295e-10	-1.06051e-10
1498	1.03996e-07	3.03416e-09	-1.13216e-10	-7.76102e-11	-4.43698e-11	-5.73064e-11	-9.27684e-11	7.22524e-09	-1.13363e-10	2.0473e-09	-9.10817e-11	6.75893e-10	4.9644e-10	-1.15839e-10
1505	1.03961e-07	3.0309e-09	-1.16348e-10	-5.25961e-11	-2.74026e-11	-5.86679e-11	-8.41535e-11	7.21211e-09	-1.22195e-10	2.05056e-09	-7.91715e-11	6.91442e-10	4.79771e-10	-1.15048e-10
1512	1.03919e-07	3.12386e-09	-1.17641e-10	-7.06475e-11	-3.9281e-11	-7.26081e-11	-7.3254e-11	7.24987e-09	-1.09485e-10	2.06143e-09	-9.92614e-11	6.82299e-10	4.99529e-10	-1.15372e-10
1519	1.03977e-07	3.07489e-09	-1.15181e-10	-7.30022e-11	-1.73767e-11	-6.59373e-11	-8.57246e-11	7.19824e-09	-9.06769e-11	2.07127e-09	-1.0055e-10	6.94453e-10	4.90037e-10	-1.1312e-10
1526	1.03916e-07	3.11651e-09	-1.15321e-10	-7.72863e-11	-5.01183e-12	-5.42072e-11	-7.57448e-11	7.22116e-09	-1.22641e-10	2.06747e-09	-9.13892e-11	7.02218e-10	4.91897e-10	-1.1318e-10
1533	1.03975e-07	3.02983e-09	-1.16165e-10	-8.25071e-11	-4.68658e-11	-5.35465e-11	-8.94337e-11	7.24023e-09	-1.20222e-10	2.08685e-09	-9.93719e-11	6.91691e-10	4.68055e-10	-1.09014e-10
1540	1.03887e-07	3.14718e-09	-1.22011e-10	-5.02525e-11	-2.10824e-11	-6.14159e-11	-7.86374e-11	7.21325e-09	-1.17611e-10	2.05218e-09	-9.69956e-11	6.74128e-10	4.88235e-10	-1.14005e-10
1547	1.03936e-07	3.19077e-09	-1.11804e-10	-6.71634e-11	-3.8871e-11	-5.78201e-11	-8.30478e-11	7.246e-09	-1.21575e-10	2.0618e-09	-8.50635e-11	7.04621e-10	4.8228e-10	-9.29192e-11
1554	1.0396e-07	3.1133e-09	-1.1755e-10	-6.98526e-11	2.79773e-12	-4.1567e-11	-7.65818e-11	7.22347e-09	-1.06782e-10	2.07564e-09	-9.56799e-11	7.07237e-10	4.67126e-10	-1.25885e-10
COH245 (total pressure = 0.026 bar, furnace T = 82.2 °C, initial reactor position = 6 mm)
Time (s)	Total signal intesity	m/z 2	m/z 12	m/z 14	m/z 15	m/z 18	m/z 40	m/z 28	m/z 32	m/z 44	m/z 33	m/z 34	m/z 48	m/z 64
0	1.62883e-07	1.81531e-09	-1.62065e-10	2.91731e-11	-1.41157e-10	9.78476e-10	4.56112e-07	3.08602e-09	5.37898e-10	1.05426e-10	-1.77611e-10	-1.7183e-10	-1.69984e-10	-1.47926e-10
7	1.62485e-07	1.80593e-09	-1.61097e-10	2.01982e-11	-1.3166e-10	1.00309e-09	4.56713e-07	3.05981e-09	5.28794e-10	7.68914e-11	-1.70901e-10	-1.59536e-10	-1.54343e-10	-1.76715e-10
14	1.62581e-07	1.83733e-09	-1.56963e-10	2.40141e-11	-1.51617e-10	9.77221e-10	4.57507e-07	3.05288e-09	5.45008e-10	8.38084e-11	-1.49895e-10	-1.63405e-10	-1.65428e-10	-1.56699e-10
21	1.62525e-07	1.82568e-09	-1.5756e-10	9.64219e-12	-1.34264e-10	9.62023e-10	4.57427e-07	3.04781e-09	5.26393e-10	7.85076e-11	-1.69035e-10	-1.51177e-10	-1.63573e-10	-1.73103e-10
28	1.62531e-07	1.77916e-09	-1.46206e-10	7.79808e-12	-1.44427e-10	9.87503e-10	4.56785e-07	3.07044e-09	5.67751e-10	1.0296e-10	-1.73528e-10	-1.63781e-10	-1.69866e-10	-1.72045e-10
35	1.62493e-07	1.81264e-09	-1.45694e-10	2.40432e-11	-1.56304e-10	9.88594e-10	4.56669e-07	3.07679e-09	5.4449e-10	9.81176e-11	-1.54032e-10	-1.59194e-10	-1.67286e-10	-1.64157e-10
42	1.62493e-07	1.80257e-09	-1.53042e-10	8.6599e-14	-1.43491e-10	9.77426e-10	4.57296e-07	3.06016e-09	5.38843e-10	9.06809e-11	-1.6146e-10	-1.74514e-10	-1.56888e-10	-1.67496e-10
49	1.62714e-07	1.81617e-09	-1.53834e-10	4.25349e-11	-1.34653e-10	9.79576e-10	4.57413e-07	3.46875e-09	6.03005e-10	2.22779e-10	-1.86806e-10	-1.4784e-10	-1.69571e-10	-1.65426e-10
56	1.62766e-07	1.82766e-09	-1.32738e-10	7.10802e-11	-1.44728e-10	1.0041e-09	4.55286e-07	4.61725e-09	7.41932e-10	1.50505e-09	-1.60371e-10	-1.65007e-10	-1.5997e-10	-1.58546e-10
63	1.62442e-07	1.84854e-09	-3.21637e-11	1.38893e-10	-1.48765e-10	1.1762e-09	4.51524e-07	5.71706e-09	7.6677e-10	4.10342e-09	-1.6527e-10	-1.50929e-10	-1.60039e-10	-1.6086e-10
70	1.62107e-07	1.83828e-09	6.03582e-11	2.00281e-10	-1.44493e-10	1.3646e-09	4.48934e-07	6.47296e-09	7.73294e-10	6.42507e-09	-1.58815e-10	-1.6625e-10	-1.59282e-10	-1.78781e-10
77	1.6178e-07	1.8807e-09	1.33944e-10	1.95105e-10	-1.33392e-10	1.51263e-09	4.46559e-07	6.79497e-09	7.69232e-10	7.66825e-09	-1.68512e-10	-1.60296e-10	-1.66069e-10	-1.5604e-10
84	1.61662e-07	1.87337e-09	1.85235e-10	2.13518e-10	-1.3765e-10	1.57197e-09	4.45733e-07	6.85478e-09	7.78977e-10	8.06639e-09	-1.64997e-10	-1.67161e-10	-1.50722e-10	-1.6521e-10
91	1.61653e-07	1.81524e-09	1.86244e-10	1.9999e-10	-1.38438e-10	1.65785e-09	4.45605e-07	6.80514e-09	7.65016e-10	8.00618e-09	-1.66414e-10	-1.60007e-10	-1.5375e-10	-1.69335e-10
98	1.61741e-07	1.82656e-09	1.66224e-10	2.02402e-10	-1.36809e-10	1.67236e-09	4.46847e-07	6.65269e-09	7.47339e-10	7.63074e-09	-1.75416e-10	-1.57636e-10	-1.77997e-10	-1.67039e-10
105	1.6174e-07	1.8557e-09	1.6405e-10	1.97445e-10	-1.49407e-10	1.72314e-09	4.47259e-07	6.4233e-09	7.49454e-10	7.23909e-09	-1.53077e-10	-1.67203e-10	-1.61305e-10	-1.82808e-10
112	1.61827e-07	1.8826e-09	1.27971e-10	1.96528e-10	-1.32141e-10	1.73747e-09	4.47246e-07	6.29775e-09	7.48831e-10	6.77987e-09	-1.48492e-10	-1.57167e-10	-1.58962e-10	-1.68889e-10
119	1.61855e-07	1.85596e-09	1.22521e-10	1.62516e-10	-1.10797e-10	1.71766e-09	4.48457e-07	6.10539e-09	7.1921e-10	6.38835e-09	-1.77545e-10	-1.59725e-10	-1.56398e-10	-1.67986e-10
126	1.62604e-07	1.88832e-09	1.17121e-10	1.69475e-10	-1.53e-10	1.73462e-09	4.51952e-07	5.84285e-09	7.46443e-10	6.01057e-09	-1.68073e-10	-1.65986e-10	-1.67202e-10	-1.65397e-10
133	1.63205e-07	1.85745e-09	8.21367e-11	1.75e-10	-1.28243e-10	1.7095e-09	4.533e-07	5.76234e-09	7.20545e-10	5.60593e-09	-1.6885e-10	-1.54678e-10	-1.62147e-10	-1.64793e-10
140	1.63473e-07	1.85298e-09	5.49917e-11	1.52723e-10	-1.37173e-10	1.72481e-09	4.54205e-07	5.5614e-09	7.17117e-10	5.21642e-09	-1.47578e-10	-1.6893e-10	-1.67494e-10	-1.62057e-10
147	1.63617e-07	1.89227e-09	5.27036e-11	1.43874e-10	-1.44795e-10	1.70642e-09	4.53968e-07	5.42851e-09	6.94486e-10	4.90243e-09	-1.65232e-10	-1.70709e-10	-1.71763e-10	-1.652e-10
154	1.6373e-07	1.88458e-09	3.95287e-11	1.30129e-10	-1.43742e-10	1.68003e-09	4.55471e-07	5.32346e-09	7.00485e-10	4.58556e-09	-1.66643e-10	-1.63547e-10	-1.72322e-10	-1.86888e-10
161	1.63781e-07	1.90895e-09	1.56095e-11	9.93809e-11	-1.32812e-10	1.67262e-09	4.56704e-07	5.15658e-09	6.71675e-10	4.28047e-09	-1.71491e-10	-1.72977e-10	-1.60507e-10	-1.85076e-10
168	1.63806e-07	1.91385e-09	3.16769e-11	8.8305e-11	-1.43286e-10	1.68929e-09	4.57092e-07	5.01803e-09	7.19752e-10	4.00357e-09	-1.79366e-10	-1.60118e-10	-1.6523e-10	-1.79937e-10
175	1.63874e-07	1.8771e-09	1.18276e-11	1.0333e-10	-1.19756e-10	1.64379e-09	4.57112e-07	4.8618e-09	6.8425e-10	3.71665e-09	-1.59561e-10	-1.598e-10	-1.7573e-10	-1.63589e-10
182	1.63904e-07	1.89496e-09	-1.42508e-11	1.02903e-10	-1.40562e-10	1.66233e-09	4.57368e-07	4.80541e-09	6.89427e-10	3.46898e-09	-1.78126e-10	-1.50173e-10	-1.6739e-10	-1.64698e-10
189	1.63923e-07	1.86563e-09	-2.15948e-11	1.00271e-10	-1.37104e-10	1.63555e-09	4.57871e-07	4.6806e-09	6.60241e-10	3.24117e-09	-1.64943e-10	-1.46066e-10	-1.76261e-10	-1.6091e-10
196	1.63548e-07	1.91513e-09	-2.45421e-11	8.76753e-11	-1.35541e-10	1.59585e-09	4.56109e-07	4.54088e-09	7.02147e-10	3.02785e-09	-1.5573e-10	-1.60805e-10	-1.66477e-10	-1.77396e-10
203	1.62625e-07	1.86801e-09	-3.86094e-11	9.12449e-11	-1.38369e-10	1.59514e-09	4.53584e-07	4.44426e-09	6.60763e-10	2.85026e-09	-1.77629e-10	-1.72679e-10	-1.6556e-10	-1.72594e-10
210	1.62351e-07	1.90518e-09	-3.2146e-11	7.18145e-11	-1.36403e-10	1.56281e-09	4.53049e-07	4.34895e-09	6.66795e-10	2.63787e-09	-1.50848e-10	-1.72085e-10	-1.7011e-10	-1.69087e-10
217	1.62295e-07	1.88157e-09	-4.34854e-11	1.01958e-10	-1.48222e-10	1.5374e-09	4.54016e-07	4.31337e-09	6.74007e-10	2.47414e-09	-1.58607e-10	-1.65261e-10	-1.6871e-10	-1.88263e-10
224	1.62257e-07	1.86187e-09	-4.57695e-11	7.481e-11	-1.25305e-10	1.53392e-09	4.5484e-07	4.18588e-09	6.98806e-10	2.30955e-09	-1.42094e-10	-1.49726e-10	-1.56836e-10	-1.66176e-10
231	1.62275e-07	1.85553e-09	-6.82389e-11	4.08973e-11	-1.21146e-10	1.52263e-09	4.54408e-07	4.15259e-09	6.58136e-10	2.15757e-09	-1.85781e-10	-1.72288e-10	-1.70314e-10	-1.73849e-10
238	1.62292e-07	1.86701e-09	-6.85509e-11	7.75066e-11	-1.5258e-10	1.54388e-09	4.5401e-07	4.08035e-09	6.533e-10	2.02944e-09	-1.66084e-10	-1.55578e-10	-1.58934e-10	-1.64202e-10
245	1.62313e-07	1.87757e-09	-6.2781e-11	6.43574e-11	-1.4696e-10	1.49737e-09	4.54825e-07	4.04333e-09	6.32868e-10	1.89786e-09	-1.78943e-10	-1.57088e-10	-1.65386e-10	-1.73552e-10
252	1.62265e-07	1.85413e-09	-6.84263e-11	6.18649e-11	-1.20547e-10	1.49339e-09	4.55228e-07	4.01118e-09	6.50834e-10	1.79675e-09	-1.73414e-10	-1.64105e-10	-1.75214e-10	-1.60044e-10
259	1.62253e-07	1.88409e-09	-9.84328e-11	5.39711e-11	-1.29705e-10	1.48787e-09	4.55163e-07	3.98463e-09	6.28753e-10	1.69163e-09	-1.59841e-10	-1.72327e-10	-1.71999e-10	-1.61722e-10
266	1.62297e-07	1.84562e-09	-9.55086e-11	6.54064e-11	-1.25119e-10	1.49615e-09	4.55093e-07	3.90613e-09	6.3624e-10	1.58169e-09	-1.6868e-10	-1.71192e-10	-1.72691e-10	-1.7254e-10
273	1.62352e-07	1.81674e-09	-8.35285e-11	7.53467e-11	-1.36503e-10	1.4719e-09	4.55085e-07	3.86561e-09	6.28161e-10	1.48299e-09	-1.64674e-10	-1.68106e-10	-1.54465e-10	-1.79065e-10
280	1.62303e-07	1.89814e-09	-1.022e-10	4.69348e-11	-1.36943e-10	1.47019e-09	4.55317e-07	3.8144e-09	6.2762e-10	1.44343e-09	-1.47628e-10	-1.62643e-10	-1.7273e-10	-1.60558e-10
287	1.62354e-07	1.85929e-09	-1.13693e-10	3.13147e-11	-1.3933e-10	1.46254e-09	4.55717e-07	3.77189e-09	6.41849e-10	1.33272e-09	-1.60885e-10	-1.68857e-10	-1.66377e-10	-1.72785e-10
294	1.62328e-07	1.87162e-09	-1.00624e-10	4.83539e-11	-1.54888e-10	1.45704e-09	4.56531e-07	3.70065e-09	5.96393e-10	1.22232e-09	-1.603e-10	-1.59604e-10	-1.67708e-10	-1.61932e-10
301	1.62375e-07	1.86182e-09	-1.11143e-10	3.81019e-11	-1.4286e-10	1.42196e-09	4.56427e-07	3.7101e-09	6.30966e-10	1.16408e-09	-1.58828e-10	-1.57057e-10	-1.7032e-10	-1.71414e-10
308	1.62333e-07	1.84568e-09	-9.07953e-11	4.63316e-11	-1.51844e-10	1.45924e-09	4.55546e-07	3.66971e-09	6.31632e-10	1.12284e-09	-1.6656e-10	-1.6067e-10	-1.66129e-10	-1.65267e-10
315	1.62384e-07	1.86307e-09	-1.32997e-10	5.25258e-11	-1.40207e-10	1.47605e-09	4.55722e-07	3.66834e-09	6.21329e-10	1.04794e-09	-1.71845e-10	-1.71819e-10	-1.75708e-10	-1.70595e-10
322	1.6236e-07	1.8699e-09	-1.07911e-10	5.04608e-11	-1.3194e-10	1.42329e-09	4.5644e-07	3.64817e-09	6.00157e-10	1.00606e-09	-1.70748e-10	-1.76926e-10	-1.72497e-10	-1.75769e-10
329	1.62403e-07	1.8499e-09	-1.10643e-10	2.31365e-11	-1.48917e-10	1.42291e-09	4.56622e-07	3.62186e-09	6.1542e-10	9.40634e-10	-1.58551e-10	-1.77839e-10	-1.76724e-10	-1.58171e-10
336	1.62357e-07	1.86629e-09	-1.13426e-10	4.94301e-11	-1.44801e-10	1.41307e-09	4.5686e-07	3.54295e-09	6.30533e-10	9.09183e-10	-1.65569e-10	-1.64605e-10	-1.65429e-10	-1.62807e-10
343	1.62359e-07	1.88945e-09	-1.37422e-10	2.32405e-11	-1.42959e-10	1.40408e-09	4.56992e-07	3.54947e-09	6.01401e-10	8.87467e-10	-1.56652e-10	-1.54751e-10	-1.55899e-10	-1.64237e-10
350	1.62378e-07	1.8332e-09	-1.22508e-10	4.99711e-11	-1.31539e-10	1.42516e-09	4.55686e-07	3.55403e-09	6.16462e-10	8.03874e-10	-1.72701e-10	-1.68557e-10	-1.54351e-10	-1.61683e-10
357	1.62365e-07	1.82824e-09	-1.32849e-10	3.16405e-11	-1.44344e-10	1.41033e-09	4.56321e-07	3.50245e-09	6.08166e-10	7.99638e-10	-1.64104e-10	-1.65087e-10	-1.62021e-10	-1.64503e-10
364	1.62319e-07	1.87254e-09	-1.33539e-10	3.2062e-11	-1.49663e-10	1.37287e-09	4.57085e-07	3.498e-09	6.03227e-10	7.58945e-10	-1.69214e-10	-1.60919e-10	-1.68209e-10	-1.6347e-10
371	1.62356e-07	1.87203e-09	-1.2904e-10	4.67031e-11	-1.50336e-10	1.36611e-09	4.56549e-07	3.47101e-09	6.1879e-10	7.48539e-10	-1.51712e-10	-1.71451e-10	-1.75525e-10	-1.7046e-10
378	1.62316e-07	1.84817e-09	-1.24534e-10	6.59781e-11	-1.41733e-10	1.33429e-09	4.57182e-07	3.42164e-09	6.26181e-10	7.13421e-10	-1.79683e-10	-1.65436e-10	-1.73838e-10	-1.53559e-10
385	1.62324e-07	1.87883e-09	-1.24918e-10	3.89316e-11	-1.35649e-10	1.38772e-09	4.56499e-07	3.44321e-09	6.07177e-10	6.52722e-10	-1.63964e-10	-1.57594e-10	-1.66286e-10	-1.54014e-10
392	1.62349e-07	1.86632e-09	-1.44177e-10	3.77836e-11	-1.38491e-10	1.34806e-09	4.55887e-07	3.44498e-09	5.96898e-10	6.46102e-10	-1.72393e-10	-1.49571e-10	-1.64201e-10	-1.79321e-10
399	1.62344e-07	1.83399e-09	-1.29027e-10	5.05509e-11	-1.54312e-10	1.34553e-09	4.56765e-07	3.42831e-09	5.73821e-10	6.08318e-10	-1.64153e-10	-1.50924e-10	-1.70899e-10	-1.58255e-10
406	1.62403e-07	1.8075e-09	-1.43795e-10	2.68656e-11	-1.47344e-10	1.33147e-09	4.56804e-07	3.35687e-09	5.87515e-10	5.8789e-10	-1.78177e-10	-1.4708e-10	-1.69972e-10	-1.60131e-10
413	1.62399e-07	1.87748e-09	-1.40313e-10	3.27522e-11	-1.35228e-10	1.34457e-09	4.57697e-07	3.38482e-09	6.13853e-10	5.72123e-10	-1.61334e-10	-1.75044e-10	-1.51664e-10	-1.53853e-10
420	1.62341e-07	1.85878e-09	-1.29848e-10	3.82497e-11	-1.44457e-10	1.3496e-09	4.56642e-07	3.3774e-09	5.95577e-10	5.36852e-10	-1.6631e-10	-1.59855e-10	-1.80104e-10	-1.62796e-10
427	1.6233e-07	1.88592e-09	-1.39373e-10	3.77308e-11	-1.48564e-10	1.355e-09	4.55963e-07	3.3741e-09	5.71443e-10	5.23039e-10	-1.56716e-10	-1.5106e-10	-1.6724e-10	-1.67867e-10
434	1.62349e-07	1.85533e-09	-1.40706e-10	3.33306e-11	-1.26153e-10	1.34341e-09	4.56657e-07	3.34136e-09	5.94298e-10	4.95682e-10	-1.65379e-10	-1.49725e-10	-1.65345e-10	-1.78986e-10
441	1.62344e-07	1.82414e-09	-1.50569e-10	3.296e-11	-1.39088e-10	1.31742e-09	4.57295e-07	3.31066e-09	5.80976e-10	4.77978e-10	-1.68081e-10	-1.71767e-10	-1.7434e-10	-1.4695e-10
448	1.62345e-07	1.83154e-09	-1.45965e-10	3.02465e-11	-1.3781e-10	1.35145e-09	4.57122e-07	3.36573e-09	6.0519e-10	4.7585e-10	-1.65909e-10	-1.72891e-10	-1.46209e-10	-1.5056e-10
455	1.62372e-07	1.87563e-09	-1.37316e-10	2.01066e-12	-1.35257e-10	1.33015e-09	4.57488e-07	3.31976e-09	5.97949e-10	4.60836e-10	-1.68774e-10	-1.47631e-10	-1.63034e-10	-1.51979e-10
462	1.62429e-07	1.83157e-09	-1.43101e-10	5.22906e-11	-1.5355e-10	1.3249e-09	4.55933e-07	3.30546e-09	5.87681e-10	4.35484e-10	-1.64732e-10	-1.65261e-10	-1.60015e-10	-1.4313e-10
469	1.62362e-07	1.8205e-09	-1.40233e-10	3.09574e-11	-1.45078e-10	1.32008e-09	4.56649e-07	3.3116e-09	6.01673e-10	4.45774e-10	-1.66819e-10	-1.79833e-10	-1.66757e-10	-1.43693e-10
476	1.6237e-07	1.86753e-09	-1.46493e-10	1.08496e-11	-1.37805e-10	1.31307e-09	4.57299e-07	3.30209e-09	5.89583e-10	4.17545e-10	-1.48019e-10	-1.59202e-10	-1.64816e-10	-1.66459e-10
483	1.62288e-07	1.86375e-09	-1.45163e-10	4.13136e-11	-1.40212e-10	1.31516e-09	4.57678e-07	3.27421e-09	5.74431e-10	3.84877e-10	-1.51488e-10	-1.67423e-10	-1.65125e-10	-1.56056e-10
490	1.62353e-07	1.84877e-09	-1.33221e-10	3.66402e-11	-1.45016e-10	1.32094e-09	4.5638e-07	3.25683e-09	6.03815e-10	4.18352e-10	-1.69363e-10	-1.50463e-10	-1.70712e-10	-1.66752e-10
497	1.62323e-07	1.84709e-09	-1.55788e-10	4.22355e-11	-1.52281e-10	1.31525e-09	4.56863e-07	3.26961e-09	5.87849e-10	4.05601e-10	-1.58778e-10	-1.50979e-10	-1.67262e-10	-1.75874e-10
504	1.62311e-07	1.88398e-09	-1.48027e-10	3.07289e-11	-1.29907e-10	1.3017e-09	4.57336e-07	3.28492e-09	5.65009e-10	3.59147e-10	-1.79662e-10	-1.57005e-10	-1.59898e-10	-1.59756e-10
511	1.6226e-07	1.86624e-09	-1.32629e-10	1.53743e-11	-1.26831e-10	1.30346e-09	4.57127e-07	3.28837e-09	5.93484e-10	3.53329e-10	-1.62091e-10	-1.68943e-10	-1.63175e-10	-1.75888e-10
518	1.62262e-07	1.8565e-09	-1.37514e-10	4.59331e-11	-1.45198e-10	1.30201e-09	4.56289e-07	3.25945e-09	5.7948e-10	3.20681e-10	-1.65397e-10	-1.65368e-10	-1.56318e-10	-1.64709e-10
525	1.62308e-07	1.85512e-09	-1.51246e-10	4.19314e-11	-1.36712e-10	1.28073e-09	4.56489e-07	3.264e-09	6.00469e-10	3.6451e-10	-1.62634e-10	-1.79145e-10	-1.62819e-10	-1.61236e-10
532	1.62238e-07	1.81606e-09	-1.40144e-10	4.28934e-11	-1.29805e-10	1.3076e-09	4.56437e-07	3.23665e-09	5.83628e-10	3.49114e-10	-1.69288e-10	-1.77792e-10	-1.77119e-10	-1.48927e-10
539	1.62274e-07	1.85794e-09	-1.58923e-10	3.48471e-12	-1.38968e-10	1.29184e-09	4.57148e-07	3.24873e-09	5.84056e-10	3.18404e-10	-1.57984e-10	-1.70529e-10	-1.63629e-10	-1.5911e-10
546	1.62238e-07	1.84241e-09	-1.38792e-10	4.74656e-11	-1.20356e-10	1.29175e-09	4.56689e-07	3.22728e-09	5.70402e-10	3.21835e-10	-1.63151e-10	-1.64359e-10	-1.75022e-10	-1.69085e-10
553	1.62218e-07	1.83511e-09	-1.5316e-10	2.8885e-11	-1.53966e-10	1.28319e-09	4.56606e-07	3.2289e-09	5.76142e-10	2.92194e-10	-1.5943e-10	-1.61395e-10	-1.77101e-10	-1.70329e-10
560	1.6231e-07	1.84379e-09	-1.54881e-10	2.41571e-11	-1.46952e-10	1.28587e-09	4.56181e-07	3.23287e-09	5.97532e-10	3.00751e-10	-1.66953e-10	-1.68252e-10	-1.76801e-10	-1.63302e-10
567	1.62303e-07	1.85582e-09	-1.32927e-10	1.98266e-11	-1.32192e-10	1.31146e-09	4.56629e-07	3.21193e-09	5.72635e-10	3.15702e-10	-1.51167e-10	-1.49126e-10	-1.75998e-10	-1.806e-10
574	1.62247e-07	1.85665e-09	-1.56068e-10	2.9289e-11	-1.47005e-10	1.29557e-09	4.5698e-07	3.23832e-09	5.94022e-10	2.98535e-10	-1.56726e-10	-1.69697e-10	-1.6311e-10	-1.71791e-10
581	1.6224e-07	1.85896e-09	-1.36413e-10	2.3434e-11	-1.35123e-10	1.27577e-09	4.57053e-07	3.20169e-09	5.95729e-10	2.95464e-10	-1.58589e-10	-1.6738e-10	-1.50671e-10	-1.64973e-10
588	1.62282e-07	1.85655e-09	-1.44299e-10	1.24596e-11	-1.32387e-10	1.27163e-09	4.5617e-07	3.1733e-09	5.79346e-10	2.66954e-10	-1.65241e-10	-1.52799e-10	-1.66138e-10	-1.56837e-10
595	1.62263e-07	1.80755e-09	-1.34242e-10	3.44578e-11	-1.45138e-10	1.28162e-09	4.56763e-07	3.21931e-09	5.83639e-10	2.5049e-10	-1.46823e-10	-1.7736e-10	-1.74798e-10	-1.68509e-10
602	1.6224e-07	1.8684e-09	-1.47709e-10	1.54864e-11	-1.2687e-10	1.27297e-09	4.56911e-07	3.20614e-09	5.92173e-10	2.65402e-10	-1.7052e-10	-1.62386e-10	-1.59215e-10	-1.63961e-10
609	1.62243e-07	1.83614e-09	-1.36464e-10	2.76365e-11	-1.29417e-10	1.27762e-09	4.58045e-07	3.20019e-09	5.97629e-10	2.73078e-10	-1.69042e-10	-1.6555e-10	-1.62163e-10	-1.58477e-10
616	1.62258e-07	1.8529e-09	-1.50862e-10	2.30613e-11	-1.31052e-10	1.2848e-09	4.57458e-07	3.17341e-09	5.64148e-10	2.42584e-10	-1.41161e-10	-1.71091e-10	-1.53177e-10	-1.71597e-10
623	1.6224e-07	1.87045e-09	-1.43059e-10	3.58138e-11	-1.47529e-10	1.26884e-09	4.56831e-07	3.18631e-09	5.58515e-10	2.53985e-10	-1.74057e-10	-1.70711e-10	-1.71536e-10	-1.60205e-10
630	1.6222e-07	1.88483e-09	-1.61529e-10	6.6449e-12	-1.4395e-10	1.25739e-09	4.56898e-07	3.22408e-09	5.94239e-10	2.5305e-10	-1.73418e-10	-1.65959e-10	-1.69945e-10	-1.74606e-10
637	1.62269e-07	1.84815e-09	-1.41768e-10	2.11015e-11	-1.44112e-10	1.25157e-09	4.56266e-07	3.2293e-09	5.59752e-10	2.31463e-10	-1.68956e-10	-1.4645e-10	-1.63715e-10	-1.64569e-10
644	1.62294e-07	1.8508e-09	-1.53769e-10	1.46909e-11	-1.43795e-10	1.29167e-09	4.57202e-07	3.22774e-09	5.80464e-10	2.17495e-10	-1.75327e-10	-1.58949e-10	-1.61202e-10	-1.46384e-10
651	1.62237e-07	1.85106e-09	-1.50343e-10	2.86563e-11	-1.3601e-10	1.25833e-09	4.56857e-07	3.18658e-09	5.63694e-10	2.49485e-10	-1.6704e-10	-1.66964e-10	-1.76832e-10	-1.68933e-10
658	1.62262e-07	1.82585e-09	-1.43727e-10	1.49535e-11	-1.5366e-10	1.25118e-09	4.57194e-07	3.22383e-09	5.55599e-10	2.2116e-10	-1.60639e-10	-1.58881e-10	-1.68985e-10	-1.68475e-10
665	1.62252e-07	1.82183e-09	-1.52224e-10	8.49249e-12	-1.33025e-10	1.25059e-09	4.56675e-07	3.14022e-09	5.94219e-10	2.29409e-10	-1.51403e-10	-1.50616e-10	-1.72247e-10	-1.72584e-10
672	1.62223e-07	1.85195e-09	-1.49163e-10	3.58618e-11	-1.38314e-10	1.22432e-09	4.56169e-07	3.16416e-09	5.81794e-10	1.94774e-10	-1.80965e-10	-1.81052e-10	-1.62905e-10	-1.7395e-10
679	1.62256e-07	1.83852e-09	-1.46452e-10	4.67342e-11	-1.33238e-10	1.25965e-09	4.55828e-07	3.18113e-09	5.72755e-10	1.93722e-10	-1.5755e-10	-1.69426e-10	-1.71337e-10	-1.62249e-10
686	1.62276e-07	1.79777e-09	-1.41683e-10	1.67648e-11	-1.49607e-10	1.25902e-09	4.56273e-07	3.17978e-09	6.04558e-10	2.21813e-10	-1.65723e-10	-1.77537e-10	-1.53511e-10	-1.62426e-10
693	1.62309e-07	1.85552e-09	-1.35818e-10	1.03799e-11	-1.4512e-10	1.24346e-09	4.57239e-07	3.18532e-09	5.83857e-10	2.01667e-10	-1.60447e-10	-1.58909e-10	-1.64125e-10	-1.51745e-10
700	1.62264e-07	1.86079e-09	-1.36581e-10	2.20757e-11	-1.53838e-10	1.25272e-09	4.56454e-07	3.13851e-09	5.72711e-10	2.08102e-10	-1.64314e-10	-1.61886e-10	-1.72176e-10	-1.64248e-10
707	1.62245e-07	1.83704e-09	-1.47277e-10	1.66988e-11	-1.39748e-10	1.25119e-09	4.57123e-07	3.16084e-09	6.03465e-10	1.94147e-10	-1.73842e-10	-1.55856e-10	-1.66705e-10	-1.69885e-10
714	1.62259e-07	1.85677e-09	-1.55644e-10	2.61722e-11	-1.4065e-10	1.25051e-09	4.57417e-07	3.18231e-09	5.89945e-10	1.96329e-10	-1.54345e-10	-1.69041e-10	-1.7441e-10	-1.66718e-10
721	1.62263e-07	1.85018e-09	-1.51229e-10	2.83823e-11	-1.31166e-10	1.2642e-09	4.57054e-07	3.13948e-09	5.56674e-10	2.16276e-10	-1.76167e-10	-1.52033e-10	-1.64776e-10	-1.72347e-10
728	1.62312e-07	1.84581e-09	-1.57125e-10	9.18587e-12	-1.38802e-10	1.23192e-09	4.55711e-07	3.14992e-09	5.74148e-10	2.21066e-10	-1.74125e-10	-1.67965e-10	-1.58104e-10	-1.68549e-10
735	1.6231e-07	1.85044e-09	-1.4878e-10	2.16386e-11	-1.51111e-10	1.24063e-09	4.56492e-07	3.15636e-09	5.52686e-10	1.84012e-10	-1.51031e-10	-1.60242e-10	-1.66994e-10	-1.45825e-10
742	1.62376e-07	1.86889e-09	-1.45723e-10	3.73782e-11	-1.29041e-10	1.25701e-09	4.57049e-07	3.15203e-09	5.70349e-10	1.99163e-10	-1.58982e-10	-1.60625e-10	-1.56367e-10	-1.68967e-10
749	1.62384e-07	1.81681e-09	-1.60075e-10	1.50453e-11	-1.40337e-10	1.23122e-09	4.57356e-07	3.16973e-09	5.57873e-10	1.95789e-10	-1.54393e-10	-1.54184e-10	-1.55839e-10	-1.67528e-10
756	1.62344e-07	1.84011e-09	-1.53552e-10	2.95491e-11	-1.42764e-10	1.24347e-09	4.56714e-07	3.13513e-09	5.72247e-10	1.93075e-10	-1.67707e-10	-1.55964e-10	-1.57256e-10	-1.67112e-10
763	1.62313e-07	1.85501e-09	-1.55288e-10	1.46085e-11	-1.49078e-10	1.26402e-09	4.56381e-07	3.14779e-09	5.56912e-10	2.10871e-10	-1.66529e-10	-1.59186e-10	-1.56623e-10	-1.53425e-10
770	1.62328e-07	1.81924e-09	-1.50487e-10	3.06501e-11	-1.40599e-10	1.20824e-09	4.5623e-07	3.1274e-09	5.41203e-10	1.87762e-10	-1.86169e-10	-1.64946e-10	-1.70351e-10	-1.71773e-10
777	1.62348e-07	1.80297e-09	-1.46228e-10	3.64386e-11	-1.36905e-10	1.22765e-09	4.57205e-07	3.12265e-09	5.51342e-10	1.95471e-10	-1.47909e-10	-1.55517e-10	-1.6931e-10	-1.71496e-10
784	1.62292e-07	1.82335e-09	-1.43042e-10	2.31855e-11	-1.40512e-10	1.21593e-09	4.56993e-07	3.12507e-09	5.86643e-10	2.0805e-10	-1.72256e-10	-1.62536e-10	-1.57329e-10	-1.5952e-10
791	1.62279e-07	1.87503e-09	-1.41251e-10	-1.82435e-12	-1.49312e-10	1.23426e-09	4.56549e-07	3.09285e-09	5.75671e-10	1.82149e-10	-1.68834e-10	-1.48403e-10	-1.67997e-10	-1.65691e-10
798	1.6226e-07	1.83631e-09	-1.65624e-10	2.48045e-11	-1.44257e-10	1.23576e-09	4.55777e-07	3.14633e-09	5.6552e-10	2.07652e-10	-1.6026e-10	-1.64355e-10	-1.70125e-10	-1.764e-10
805	1.6229e-07	1.83434e-09	-1.51284e-10	4.58493e-11	-1.66567e-10	1.23951e-09	4.56736e-07	3.15978e-09	5.71807e-10	1.77968e-10	-1.60976e-10	-1.62213e-10	-1.69824e-10	-1.67795e-10
812	1.62311e-07	1.84109e-09	-1.49528e-10	-7.22411e-12	-1.17309e-10	1.24559e-09	4.5729e-07	3.11442e-09	5.68638e-10	1.61017e-10	-1.50942e-10	-1.56516e-10	-1.66066e-10	-1.59229e-10
819	1.6225e-07	1.85841e-09	-1.49999e-10	3.62289e-11	-1.28227e-10	1.18819e-09	4.56846e-07	3.11314e-09	5.5236e-10	1.70733e-10	-1.65928e-10	-1.77858e-10	-1.68113e-10	-1.52339e-10
826	1.62304e-07	1.81917e-09	-1.47889e-10	1.8487e-11	-1.57763e-10	1.21975e-09	4.56309e-07	3.13956e-09	5.48684e-10	1.55681e-10	-1.65028e-10	-1.58752e-10	-1.64228e-10	-1.66764e-10
833	1.6231e-07	1.82626e-09	-1.41373e-10	1.39336e-11	-1.2426e-10	1.19713e-09	4.5683e-07	3.12892e-09	5.7343e-10	1.84898e-10	-1.58873e-10	-1.78407e-10	-1.55249e-10	-1.56095e-10
840	1.62294e-07	1.80637e-09	-1.54968e-10	2.05642e-11	-1.28595e-10	1.24445e-09	4.57654e-07	3.12104e-09	5.58667e-10	1.81802e-10	-1.64599e-10	-1.59536e-10	-1.66853e-10	-1.65016e-10
847	1.62343e-07	1.7943e-09	-1.5964e-10	2.86856e-11	-1.38066e-10	1.22332e-09	4.5737e-07	3.13819e-09	5.9354e-10	1.80282e-10	-1.6603e-10	-1.67035e-10	-1.54682e-10	-1.77266e-10
854	1.62316e-07	1.83271e-09	-1.36175e-10	3.42232e-11	-1.41794e-10	1.2007e-09	4.56107e-07	3.10593e-09	5.57493e-10	1.79835e-10	-1.36983e-10	-1.77162e-10	-1.48486e-10	-1.72307e-10
861	1.62399e-07	1.83182e-09	-1.39072e-10	2.35836e-11	-1.4067e-10	1.2141e-09	4.56757e-07	3.10481e-09	5.705e-10	1.56542e-10	-1.72963e-10	-1.54733e-10	-1.57272e-10	-1.58502e-10
868	1.62366e-07	1.80928e-09	-1.56927e-10	2.10038e-11	-1.35735e-10	1.23561e-09	4.57515e-07	3.13392e-09	5.68219e-10	1.97343e-10	-1.53005e-10	-1.60882e-10	-1.59313e-10	-1.73794e-10
875	1.62326e-07	1.8395e-09	-1.366e-10	2.42941e-11	-1.44069e-10	1.22919e-09	4.57554e-07	3.12335e-09	5.68719e-10	1.4286e-10	-1.72637e-10	-1.68412e-10	-1.79372e-10	-1.50134e-10
882	1.62399e-07	1.8496e-09	-1.53434e-10	6.54261e-12	-1.39666e-10	1.2252e-09	4.56676e-07	3.12838e-09	5.52859e-10	1.6e-10	-1.6634e-10	-1.66928e-10	-1.81845e-10	-1.79057e-10
889	1.62399e-07	1.86566e-09	-1.38182e-10	1.49074e-11	-1.42206e-10	1.19673e-09	4.57273e-07	3.12839e-09	5.20876e-10	1.53799e-10	-1.509e-10	-1.62691e-10	-1.68185e-10	-1.68583e-10
896	1.62405e-07	1.83045e-09	-1.49393e-10	4.44748e-12	-1.45187e-10	1.1983e-09	4.57695e-07	3.12189e-09	5.77433e-10	1.87264e-10	-1.72407e-10	-1.58148e-10	-1.67374e-10	-1.7034e-10
903	1.62364e-07	1.85255e-09	-1.63531e-10	1.80206e-11	-1.41887e-10	1.21433e-09	4.57371e-07	3.10011e-09	5.52059e-10	1.66526e-10	-1.74095e-10	-1.58919e-10	-1.62284e-10	-1.66782e-10
910	1.62373e-07	1.83634e-09	-1.52085e-10	1.07473e-11	-1.58291e-10	1.18826e-09	4.57302e-07	3.12152e-09	5.51615e-10	1.71078e-10	-1.66736e-10	-1.50516e-10	-1.61662e-10	-1.3979e-10
917	1.62335e-07	1.84074e-09	-1.6593e-10	2.47855e-12	-1.5427e-10	1.23919e-09	4.56705e-07	3.07595e-09	5.71481e-10	1.66743e-10	-1.65274e-10	-1.70864e-10	-1.74539e-10	-1.67999e-10
924	1.62305e-07	1.82442e-09	-1.37008e-10	3.56367e-11	-1.27006e-10	1.19703e-09	4.5682e-07	3.10242e-09	5.79577e-10	1.68782e-10	-1.65792e-10	-1.60284e-10	-1.39854e-10	-1.86817e-10
931	1.623e-07	1.85484e-09	-1.42468e-10	3.16226e-11	-1.42413e-10	1.19999e-09	4.57587e-07	3.1393e-09	5.63179e-10	1.68807e-10	-1.58231e-10	-1.64204e-10	-1.52239e-10	-1.64717e-10
938	1.62264e-07	1.80173e-09	-1.46747e-10	8.47665e-13	-1.40209e-10	1.20043e-09	4.56816e-07	3.11988e-09	5.46845e-10	1.87708e-10	-1.59945e-10	-1.5813e-10	-1.6753e-10	-1.74054e-10
945	1.62259e-07	1.82534e-09	-1.60872e-10	-8.3547e-12	-1.31857e-10	1.22484e-09	4.56063e-07	3.07268e-09	5.53948e-10	1.79768e-10	-1.712e-10	-1.79957e-10	-1.67283e-10	-1.71824e-10
952	1.62325e-07	1.81181e-09	-1.51208e-10	5.05036e-12	-1.59226e-10	1.20687e-09	4.56577e-07	3.10937e-09	5.62131e-10	1.64592e-10	-1.63183e-10	-1.7637e-10	-1.43572e-10	-1.6694e-10
959	1.62317e-07	1.837e-09	-1.56911e-10	2.82153e-11	-1.37503e-10	1.20441e-09	4.56983e-07	3.09404e-09	5.77566e-10	1.74113e-10	-1.58882e-10	-1.58808e-10	-1.5438e-10	-1.6872e-10
966	1.62287e-07	1.81341e-09	-1.35797e-10	1.93223e-11	-1.47096e-10	1.21754e-09	4.57849e-07	3.10009e-09	5.71711e-10	1.72619e-10	-1.63962e-10	-1.38359e-10	-1.71769e-10	-1.64768e-10
973	1.62259e-07	1.82869e-09	-1.5181e-10	3.23462e-11	-1.47564e-10	1.21037e-09	4.56923e-07	3.03158e-09	5.5649e-10	1.58597e-10	-1.53229e-10	-1.74012e-10	-1.81561e-10	-1.68552e-10
980	1.62302e-07	1.84435e-09	-1.67203e-10	4.09223e-11	-1.39209e-10	1.21156e-09	4.56856e-07	3.1253e-09	5.54365e-10	1.45215e-10	-1.70529e-10	-1.69636e-10	-1.49298e-10	-1.43592e-10
987	1.62305e-07	1.80251e-09	-1.57835e-10	-1.65571e-12	-1.42812e-10	1.23358e-09	4.56529e-07	3.03642e-09	5.52676e-10	1.52963e-10	-1.69296e-10	-1.59157e-10	-1.64756e-10	-1.57541e-10
994	1.62244e-07	1.83053e-09	-1.55581e-10	2.07091e-11	-1.49137e-10	1.22025e-09	4.57095e-07	3.11013e-09	5.60526e-10	1.63871e-10	-1.73129e-10	-1.59188e-10	-1.68597e-10	-1.71323e-10
1001	1.62236e-07	1.86065e-09	-1.57938e-10	1.51429e-11	-1.60767e-10	1.19586e-09	4.57255e-07	3.06902e-09	5.71358e-10	1.58561e-10	-1.60104e-10	-1.64276e-10	-1.80587e-10	-1.54542e-10
1008	1.62213e-07	1.81795e-09	-1.53097e-10	4.33943e-11	-1.44926e-10	1.18917e-09	4.56684e-07	3.08364e-09	5.67263e-10	1.62904e-10	-1.62919e-10	-1.59848e-10	-1.79822e-10	-1.7268e-10
1015	1.62288e-07	1.85113e-09	-1.50136e-10	2.75896e-12	-1.37755e-10	1.22409e-09	4.56469e-07	3.09614e-09	5.59799e-10	1.4968e-10	-1.59395e-10	-1.71494e-10	-1.70531e-10	-1.61929e-10
1022	1.62298e-07	1.84063e-09	-1.52938e-10	3.0233e-11	-1.5181e-10	1.20454e-09	4.56065e-07	3.03847e-09	5.61571e-10	1.44524e-10	-1.72551e-10	-1.75539e-10	-1.67536e-10	-1.45175e-10
1029	1.62249e-07	1.82807e-09	-1.46131e-10	2.47318e-11	-1.30576e-10	1.17336e-09	4.56633e-07	3.04479e-09	5.48361e-10	1.70918e-10	-1.71747e-10	-1.5079e-10	-1.66598e-10	-1.59946e-10
1036	1.62218e-07	1.84805e-09	-1.43157e-10	2.46737e-11	-1.27577e-10	1.17263e-09	4.569e-07	3.08925e-09	5.38742e-10	1.42477e-10	-1.70945e-10	-1.6294e-10	-1.49344e-10	-1.52683e-10
1043	1.62229e-07	1.86115e-09	-1.38877e-10	3.89407e-11	-1.27987e-10	1.2084e-09	4.56696e-07	3.03911e-09	5.77475e-10	1.59371e-10	-1.59943e-10	-1.67659e-10	-1.7482e-10	-1.71403e-10
1050	1.62282e-07	1.83614e-09	-1.54422e-10	4.30742e-12	-1.26803e-10	1.20149e-09	4.56404e-07	3.06233e-09	5.50003e-10	1.59819e-10	-1.6266e-10	-1.47322e-10	-1.70415e-10	-1.42661e-10
1057	1.623e-07	1.83265e-09	-1.51479e-10	2.28465e-11	-1.38635e-10	1.20432e-09	4.56623e-07	3.06571e-09	5.58386e-10	1.38707e-10	-1.64223e-10	-1.64208e-10	-1.58532e-10	-1.74808e-10
1064	1.62286e-07	1.80394e-09	-1.58753e-10	3.43231e-12	-1.29277e-10	1.18908e-09	4.56985e-07	3.07951e-09	5.38815e-10	1.43521e-10	-1.63754e-10	-1.5433e-10	-1.62922e-10	-1.66337e-10
1071	1.6229e-07	1.81315e-09	-1.42575e-10	2.4248e-11	-1.45141e-10	1.18704e-09	4.57111e-07	3.06655e-09	5.59474e-10	1.46582e-10	-1.67951e-10	-1.60774e-10	-1.68211e-10	-1.74352e-10
1078	1.62328e-07	1.81601e-09	-1.40535e-10	1.73211e-11	-1.35621e-10	1.18494e-09	4.57412e-07	3.07295e-09	5.4523e-10	1.393e-10	-1.61669e-10	-1.62801e-10	-1.73321e-10	-1.73869e-10
1085	1.62288e-07	1.84021e-09	-1.52504e-10	4.19761e-11	-1.42497e-10	1.1981e-09	4.5638e-07	3.08186e-09	5.5975e-10	1.56219e-10	-1.58865e-10	-1.69492e-10	-1.70882e-10	-1.56704e-10
1092	1.6223e-07	1.83537e-09	-1.49747e-10	1.33486e-11	-1.4761e-10	1.18861e-09	4.56457e-07	3.07033e-09	5.30448e-10	1.60635e-10	-1.67969e-10	-1.48969e-10	-1.52937e-10	-1.53992e-10
1099	1.62286e-07	1.81455e-09	-1.48035e-10	1.91839e-11	-1.38343e-10	1.18856e-09	4.57123e-07	3.03352e-09	5.41583e-10	1.52864e-10	-1.63865e-10	-1.584e-10	-1.80846e-10	-1.71177e-10
1106	1.62234e-07	1.8465e-09	-1.43718e-10	3.68034e-11	-1.58087e-10	1.20837e-09	4.57875e-07	3.09374e-09	5.45637e-10	1.30472e-10	-1.56838e-10	-1.52101e-10	-1.70684e-10	-1.6334e-10
1113	1.6226e-07	1.84876e-09	-1.51143e-10	1.2378e-11	-1.26664e-10	1.20533e-09	4.57181e-07	3.0652e-09	5.58131e-10	1.61706e-10	-1.47942e-10	-1.52145e-10	-1.62681e-10	-1.49957e-10
1120	1.62262e-07	1.85707e-09	-1.62284e-10	-1.65805e-12	-1.38291e-10	1.21776e-09	4.55943e-07	3.06733e-09	5.22211e-10	1.63344e-10	-1.76026e-10	-1.66791e-10	-1.64044e-10	-1.69904e-10
1127	1.62259e-07	1.79362e-09	-1.61607e-10	4.10709e-11	-1.48253e-10	1.18874e-09	4.55836e-07	3.0653e-09	5.26743e-10	1.493e-10	-1.78926e-10	-1.75635e-10	-1.62205e-10	-1.63723e-10
1134	1.62402e-07	1.85726e-09	-1.56108e-10	1.37879e-11	-1.40406e-10	1.18189e-09	4.57034e-07	3.0496e-09	5.59117e-10	1.27902e-10	-1.53939e-10	-1.61943e-10	-1.65542e-10	-1.5836e-10
1141	1.62287e-07	1.83083e-09	-1.44954e-10	2.41634e-11	-1.43852e-10	1.21035e-09	4.56763e-07	3.00017e-09	5.21782e-10	1.46988e-10	-1.72957e-10	-1.6197e-10	-1.65288e-10	-1.55493e-10
1148	1.62295e-07	1.84931e-09	-1.51098e-10	1.97425e-11	-1.21626e-10	1.18872e-09	4.57155e-07	3.01467e-09	5.29754e-10	1.34209e-10	-1.61338e-10	-1.71181e-10	-1.593e-10	-1.60304e-10
1155	1.62271e-07	1.78923e-09	-1.46292e-10	1.57462e-11	-1.40304e-10	1.1624e-09	4.56801e-07	3.00499e-09	5.62509e-10	1.42254e-10	-1.70676e-10	-1.60511e-10	-1.51124e-10	-1.651e-10
1162	1.62283e-07	1.78758e-09	-1.56468e-10	-2.50453e-12	-1.48057e-10	1.17405e-09	4.56471e-07	3.02883e-09	5.40005e-10	1.40123e-10	-1.51932e-10	-1.43324e-10	-1.6489e-10	-1.68108e-10
1169	1.62258e-07	1.82595e-09	-1.4406e-10	1.0703e-11	-1.38612e-10	1.19978e-09	4.5638e-07	3.01662e-09	5.73216e-10	1.56905e-10	-1.62536e-10	-1.71105e-10	-1.59047e-10	-1.67723e-10
1176	1.62228e-07	1.81119e-09	-1.47634e-10	1.18246e-11	-1.39597e-10	1.23843e-09	4.56714e-07	3.00406e-09	5.33561e-10	1.27824e-10	-1.65539e-10	-1.55644e-10	-1.68988e-10	-1.63227e-10
1183	1.62243e-07	1.79658e-09	-1.70202e-10	2.12602e-11	-1.18528e-10	1.17382e-09	4.57496e-07	3.083e-09	5.53147e-10	1.5691e-10	-1.70051e-10	-1.60838e-10	-1.5086e-10	-1.72103e-10
1190	1.62363e-07	1.79522e-09	-1.32745e-10	2.21653e-11	-1.49331e-10	1.19019e-09	4.57458e-07	3.03384e-09	5.53246e-10	1.40176e-10	-1.67533e-10	-1.65236e-10	-1.80645e-10	-1.67351e-10
1197	1.62334e-07	1.84228e-09	-1.45522e-10	1.45933e-11	-1.35153e-10	1.19919e-09	4.56818e-07	3.02677e-09	5.46433e-10	1.30942e-10	-1.64386e-10	-1.49626e-10	-1.63317e-10	-1.63127e-10
1204	1.62253e-07	1.80725e-09	-1.45664e-10	3.0487e-11	-1.55027e-10	1.20693e-09	4.55747e-07	3.02798e-09	5.50644e-10	1.58497e-10	-1.45065e-10	-1.70843e-10	-1.70389e-10	-1.77669e-10
1211	1.62265e-07	1.80751e-09	-1.5173e-10	-9.649e-12	-1.43711e-10	1.15723e-09	4.56645e-07	3.01156e-09	5.30589e-10	1.35034e-10	-1.62354e-10	-1.72758e-10	-1.79017e-10	-1.69953e-10
1218	1.62263e-07	1.83771e-09	-1.63357e-10	2.67245e-11	-1.44966e-10	1.18427e-09	4.57359e-07	3.02281e-09	5.58048e-10	1.57827e-10	-1.53969e-10	-1.64481e-10	-1.76544e-10	-1.53885e-10
1225	1.62229e-07	1.831e-09	-1.48624e-10	1.17261e-11	-1.47566e-10	1.19013e-09	4.57507e-07	3.03495e-09	5.26662e-10	1.30368e-10	-1.78205e-10	-1.62338e-10	-1.60019e-10	-1.65689e-10
1232	1.62201e-07	1.81436e-09	-1.35493e-10	1.3594e-11	-1.39087e-10	1.19653e-09	4.56542e-07	3.02802e-09	5.28542e-10	1.5793e-10	-1.61707e-10	-1.55058e-10	-1.84491e-10	-1.68174e-10
1239	1.62218e-07	1.81169e-09	-1.62155e-10	6.90121e-12	-1.31438e-10	1.19309e-09	4.55469e-07	2.992e-09	5.46742e-10	1.31131e-10	-1.62926e-10	-1.6714e-10	-1.55368e-10	-1.60768e-10
1246	1.62182e-07	1.83754e-09	-1.48589e-10	1.70838e-11	-1.46056e-10	1.18422e-09	4.55784e-07	3.06194e-09	5.08132e-10	1.55886e-10	-1.54826e-10	-1.58107e-10	-1.58284e-10	-1.80575e-10
1253	1.62245e-07	1.85038e-09	-1.39086e-10	-3.40213e-12	-1.4311e-10	1.19478e-09	4.56577e-07	3.02078e-09	5.56973e-10	1.326e-10	-1.65827e-10	-1.67427e-10	-1.60792e-10	-1.67406e-10
1260	1.62213e-07	1.80858e-09	-1.62384e-10	3.13408e-11	-1.40978e-10	1.19438e-09	4.56974e-07	3.0405e-09	5.36678e-10	1.28954e-10	-1.58992e-10	-1.77364e-10	-1.8199e-10	-1.73706e-10
1267	1.62163e-07	1.80049e-09	-1.46645e-10	1.38624e-11	-1.44328e-10	1.18227e-09	4.57472e-07	2.99516e-09	5.37503e-10	1.39825e-10	-1.79298e-10	-1.60261e-10	-1.89374e-10	-1.56659e-10
1274	1.62238e-07	1.82988e-09	-1.45362e-10	1.60173e-11	-1.46863e-10	1.19376e-09	4.57004e-07	2.99359e-09	5.51866e-10	1.25327e-10	-1.6385e-10	-1.66019e-10	-1.58395e-10	-1.57892e-10
1281	1.62272e-07	1.8263e-09	-1.58313e-10	3.1839e-11	-1.29093e-10	1.19159e-09	4.56484e-07	3.01119e-09	5.28863e-10	1.26779e-10	-1.62879e-10	-1.75917e-10	-1.69593e-10	-1.56872e-10
1288	1.62238e-07	1.8112e-09	-1.49305e-10	3.54352e-11	-1.48394e-10	1.18249e-09	4.56349e-07	3.00946e-09	5.39418e-10	1.41787e-10	-1.67336e-10	-1.70226e-10	-1.55746e-10	-1.7162e-10
1295	1.62278e-07	1.87792e-09	-1.59902e-10	3.38835e-11	-1.31453e-10	1.13098e-09	4.56648e-07	3.03237e-09	5.3564e-10	1.44549e-10	-1.54899e-10	-1.66487e-10	-1.83238e-10	-1.56298e-10
1302	1.62206e-07	1.82109e-09	-1.48988e-10	2.58348e-11	-1.47933e-10	1.18041e-09	4.57328e-07	2.98944e-09	5.28149e-10	1.33007e-10	-1.64885e-10	-1.69862e-10	-1.73554e-10	-1.61064e-10
1309	1.62174e-07	1.8475e-09	-1.56648e-10	2.12335e-11	-1.41802e-10	1.20897e-09	4.56943e-07	3.02187e-09	5.52697e-10	1.15855e-10	-1.60924e-10	-1.68416e-10	-1.79228e-10	-1.72871e-10
1316	1.62251e-07	1.85363e-09	-1.55639e-10	1.10185e-11	-1.55579e-10	1.18858e-09	4.56192e-07	2.98461e-09	5.48437e-10	1.3137e-10	-1.51631e-10	-1.7635e-10	-1.54698e-10	-1.51051e-10
1323	1.62221e-07	1.80729e-09	-1.52592e-10	1.99985e-11	-1.45871e-10	1.17562e-09	4.56393e-07	3.02788e-09	5.18508e-10	1.4099e-10	-1.65258e-10	-1.62399e-10	-1.55583e-10	-1.68457e-10
1330	1.62219e-07	1.84747e-09	-1.41075e-10	2.31964e-11	-1.53862e-10	1.17785e-09	4.56964e-07	2.99657e-09	5.38868e-10	1.4171e-10	-1.67512e-10	-1.65492e-10	-1.65719e-10	-1.82109e-10
1337	1.62198e-07	1.8155e-09	-1.57076e-10	1.26726e-11	-1.44193e-10	1.16617e-09	4.57098e-07	2.98671e-09	5.6104e-10	1.12401e-10	-1.69892e-10	-1.49816e-10	-1.68566e-10	-1.70676e-10
1344	1.6219e-07	1.82765e-09	-1.48173e-10	5.00935e-12	-1.38062e-10	1.17559e-09	4.56942e-07	3.00984e-09	5.40822e-10	1.13049e-10	-1.62791e-10	-1.6278e-10	-1.71096e-10	-1.74544e-10
1351	1.62252e-07	1.79839e-09	-1.53077e-10	4.17548e-12	-1.41967e-10	1.15565e-09	4.55957e-07	3.01493e-09	5.2632e-10	1.32977e-10	-1.56561e-10	-1.4968e-10	-1.75157e-10	-1.736e-10
1358	1.62214e-07	1.84829e-09	-1.52133e-10	1.95517e-11	-1.23853e-10	1.17239e-09	4.56162e-07	2.9947e-09	5.26296e-10	1.32878e-10	-1.66879e-10	-1.4702e-10	-1.6036e-10	-1.70164e-10
1365	1.62219e-07	1.82068e-09	-1.57775e-10	1.76143e-11	-1.44251e-10	1.17264e-09	4.56564e-07	3.00369e-09	5.39666e-10	1.44307e-10	-1.66957e-10	-1.64066e-10	-1.68058e-10	-1.57902e-10
1372	1.62259e-07	1.81028e-09	-1.40729e-10	2.94579e-11	-1.32089e-10	1.18193e-09	4.57014e-07	3.00922e-09	5.55104e-10	1.29516e-10	-1.70078e-10	-1.54761e-10	-1.6629e-10	-1.67089e-10
1379	1.62238e-07	1.8135e-09	-1.44663e-10	3.02602e-11	-1.25063e-10	1.20303e-09	4.56232e-07	2.97288e-09	5.22441e-10	1.15137e-10	-1.73177e-10	-1.52814e-10	-1.65748e-10	-1.76692e-10
1386	1.62242e-07	1.83227e-09	-1.60871e-10	5.25174e-12	-1.35669e-10	1.20154e-09	4.56286e-07	3.01831e-09	5.59247e-10	1.13287e-10	-1.67773e-10	-1.51394e-10	-1.6252e-10	-1.67454e-10
1393	1.62216e-07	1.79795e-09	-1.46871e-10	1.14757e-11	-1.5894e-10	1.17381e-09	4.56763e-07	3.00427e-09	5.40579e-10	1.40693e-10	-1.4636e-10	-1.61514e-10	-1.76711e-10	-1.69137e-10
1400	1.62239e-07	1.82241e-09	-1.47129e-10	-2.69255e-12	-1.44083e-10	1.19301e-09	4.56963e-07	2.95246e-09	5.47674e-10	1.2697e-10	-1.55671e-10	-1.5863e-10	-1.73606e-10	-1.42445e-10
1407	1.6222e-07	1.80794e-09	-1.43593e-10	1.0166e-11	-1.58184e-10	1.16394e-09	4.57173e-07	2.98824e-09	5.50553e-10	1.08633e-10	-1.67434e-10	-1.70641e-10	-1.61939e-10	-1.74348e-10
1414	1.62209e-07	1.81764e-09	-1.62707e-10	2.00416e-11	-1.34251e-10	1.15466e-09	4.55849e-07	3.00578e-09	5.48037e-10	1.49355e-10	-1.5894e-10	-1.77135e-10	-1.52272e-10	-1.66883e-10
1421	1.62173e-07	1.83132e-09	-1.53288e-10	2.66161e-11	-1.28602e-10	1.19139e-09	4.55538e-07	2.95933e-09	5.54147e-10	1.21736e-10	-1.44345e-10	-1.56075e-10	-1.61772e-10	-1.68624e-10
1428	1.62195e-07	1.8336e-09	-1.39803e-10	1.33424e-11	-1.38961e-10	1.1961e-09	4.56558e-07	2.98747e-09	5.45475e-10	1.29162e-10	-1.61782e-10	-1.64108e-10	-1.78049e-10	-1.70715e-10
1435	1.62193e-07	1.83198e-09	-1.5829e-10	8.24397e-12	-1.47785e-10	1.17571e-09	4.57965e-07	2.97486e-09	5.12215e-10	1.1974e-10	-1.70775e-10	-1.44849e-10	-1.73649e-10	-1.69221e-10
1442	1.62131e-07	1.82142e-09	-1.54722e-10	4.02715e-12	-1.44504e-10	1.17611e-09	4.56615e-07	2.98924e-09	5.32399e-10	1.34292e-10	-1.65099e-10	-1.68416e-10	-1.65501e-10	-1.65658e-10
1449	1.62143e-07	1.82816e-09	-1.38964e-10	1.15974e-11	-1.40004e-10	1.19254e-09	4.56206e-07	2.96858e-09	5.42461e-10	1.08734e-10	-1.48049e-10	-1.48214e-10	-1.70257e-10	-1.67941e-10
1456	1.62188e-07	1.84755e-09	-1.54573e-10	8.21841e-12	-1.30641e-10	1.17722e-09	4.56656e-07	3.00924e-09	4.90358e-10	1.15579e-10	-1.66964e-10	-1.50033e-10	-1.68296e-10	-1.79897e-10
1463	1.62177e-07	1.8517e-09	-1.39089e-10	2.90919e-11	-1.6375e-10	1.19041e-09	4.56519e-07	2.95354e-09	5.34389e-10	1.31279e-10	-1.6068e-10	-1.60538e-10	-1.62324e-10	-1.72333e-10
1470	1.62234e-07	1.78931e-09	-1.38578e-10	2.32923e-11	-1.29712e-10	1.1562e-09	4.57187e-07	2.97715e-09	5.47283e-10	1.44598e-10	-1.59188e-10	-1.64904e-10	-1.67945e-10	-1.66728e-10
1477	1.62199e-07	1.8316e-09	-1.52574e-10	1.43175e-11	-1.4116e-10	1.20891e-09	4.56169e-07	2.9843e-09	5.07274e-10	1.19824e-10	-1.65963e-10	-1.66219e-10	-1.68503e-10	-1.51908e-10
1484	1.62198e-07	1.82497e-09	-1.4777e-10	2.22518e-11	-1.40468e-10	1.14812e-09	4.55843e-07	2.93519e-09	5.29731e-10	1.18511e-10	-1.6616e-10	-1.66259e-10	-1.52475e-10	-1.70371e-10
1491	1.62141e-07	1.81504e-09	-1.40845e-10	-5.37313e-12	-1.37429e-10	1.18223e-09	4.56537e-07	2.95876e-09	5.11742e-10	1.4264e-10	-1.7181e-10	-1.63784e-10	-1.67818e-10	-1.61496e-10
1498	1.62184e-07	1.83036e-09	-1.51118e-10	5.09011e-12	-1.50511e-10	1.15521e-09	4.57145e-07	3.00464e-09	5.31517e-10	1.44439e-10	-1.45978e-10	-1.5424e-10	-1.71128e-10	-1.78196e-10
1505	1.62208e-07	1.85235e-09	-1.55086e-10	2.07505e-11	-1.45225e-10	1.18823e-09	4.56927e-07	2.98291e-09	5.44672e-10	9.72172e-11	-1.52966e-10	-1.46565e-10	-1.69251e-10	-1.86405e-10
1512	1.62188e-07	1.80735e-09	-1.67548e-10	2.25976e-11	-1.44467e-10	1.17478e-09	4.55924e-07	2.93917e-09	5.28951e-10	1.36286e-10	-1.62424e-10	-1.73468e-10	-1.72841e-10	-1.69432e-10
1519	1.62146e-07	1.79326e-09	-1.29122e-10	2.36353e-11	-1.59226e-10	1.17912e-09	4.56028e-07	2.93272e-09	5.1594e-10	1.23187e-10	-1.60096e-10	-1.66053e-10	-1.67746e-10	-1.59175e-10
1526	1.62105e-07	1.85743e-09	-1.60929e-10	7.37956e-15	-1.49859e-10	1.18738e-09	4.56505e-07	2.95658e-09	5.54584e-10	1.36207e-10	-1.73507e-10	-1.68334e-10	-1.5954e-10	-1.57047e-10
1533	1.62138e-07	1.82664e-09	-1.48381e-10	2.02017e-11	-1.52755e-10	1.16296e-09	4.56815e-07	2.96118e-09	5.17827e-10	1.28572e-10	-1.56928e-10	-1.67938e-10	-1.77666e-10	-1.64211e-10
1540	1.62166e-07	1.82181e-09	-1.45442e-10	1.28425e-11	-1.35004e-10	1.19529e-09	4.55543e-07	2.95446e-09	5.28714e-10	1.34277e-10	-1.61395e-10	-1.61125e-10	-1.64564e-10	-1.606e-10
1547	1.6213e-07	1.82171e-09	-1.58328e-10	6.54416e-14	-1.63732e-10	1.19024e-09	4.55734e-07	2.9638e-09	5.3332e-10	1.27087e-10	-1.64623e-10	-1.65396e-10	-1.67312e-10	-1.631e-10
1554	1.62154e-07	1.81127e-09	-1.54696e-10	3.54447e-11	-1.4451e-10	1.18244e-09	4.56683e-07	2.95407e-09	5.28467e-10	1.19184e-10	-1.47174e-10	-1.61815e-10	-1.6652e-10	-1.64409e-10

## Sheet: Table S5
Table S5. IRMS δ13C determination of CO2 in organic matter pyrolysis experiment at 3 GPa, 700 °C, ΔFMQ = +0.8.
COH210
Sample	δ13C
QMS_COH245_1	-15.406
QMS_COH245_2	-15.461
QMS_COH245_3	-15.407
QMS_COH245_4	-15.416
QMS_COH245_5	-15.399
QMS_COH245_6	-15.421
QMS_COH245_7	-15.316
Average (1σ)	-15.40(4)
COH245
Sample	δ13C
QMS_COH245_1	-16.339
QMS_COH245_2	-16.237
QMS_COH245_3	-16.207
QMS_COH245_4	-16.224
QMS_COH245_5	-16.186
QMS_COH245_6	-16.228
Average (1σ)	-16.24(5)
