# Supplementary material for: A reliable analytical procedure to determine the carbon isotopic signature of CO2-bearing COH fluids generated in petrological experiments
Source: Copernicus journal article supplement (doi:10.5194/ejm-37-25-2025), 2025-01-17
Supplement: Supplementary file 1 [file ejm-37-25-2025-supplement.zip]

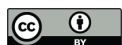

*Supplement of*

**A reliable analytical procedure to determine the carbon isotopic signature of CO<sub>2</sub>-bearing COH fluids generated in petrological experiments**

**Luca Toffolo et al.**

*Correspondence to:* Luca Toffolo ([luca.toffolo@unimi.it](mailto:luca.toffolo@unimi.it))

- [ejm-37-25-2025-supplement-title-page.pdf](#)
- Supplementary information
  - [FigureS1.tif](#)
  - [FigureS2.tif](#)
  - [Supplementary Tables.xlsx](#)

The copyright of individual parts of the supplement might differ from the article licence.
